# Supplementary material for: Continued Circulation of Highly Pathogenic H5 Influenza Viruses in Vietnamese Live Bird Markets in 2018–2021
Source: MDPI journal article supplement (doi:10.3390/v15071596), 2023-07-21
Supplement: s1 [file s1]

**Supplemental Figure S1. Phylogenetic analysis of the HA genes of highly pathogenic H5N6 influenza viruses isolated in Vietnam from 2018 to 2021.** The HA genes were rooted to A/goose/Guangdong/1/1996 (Gs/GD; H5N1). Viruses isolated in this study are shown in red. All other viruses are color-coded based on the HA clade. Bootstrap values greater than 70% are indicated by open diamonds. The scale bar represents the nucleotide substitution rate at each site.

**Supplemental Figure S2. Phylogenetic analysis of the NA genes of highly pathogenic H5N6 influenza viruses isolated in Vietnam from 2018 to 2021.** Viruses isolated in this study are shown in red. All other viruses are color-coded based on the HA subtype. Bootstrap values greater than 70% are indicated by open diamonds. The scale bar represents the nucleotide substitution rate at each site.

**Supplemental Figure S3. Phylogenetic analysis of the PB2 genes of highly pathogenic H5N6 influenza viruses isolated in Vietnam from 2018 to 2021.** Viruses isolated in this study are shown in red. All other viruses are color-coded based on the HA subtype. Bootstrap values greater than 70% are indicated by open diamonds. The scale bar represents the nucleotide substitution rate at each site.

**Supplemental Figure S4. Phylogenetic analysis of the PB1 genes of highly pathogenic H5N6 influenza viruses isolated in Vietnam from 2018 to 2021.** Viruses isolated in this study are shown in red. All other viruses are color-coded based on the HA subtype. Bootstrap values greater than 70% are indicated by open diamonds. The scale bar represents the nucleotide substitution rate at each site.

**Supplemental Figure S5. Phylogenetic analysis of the PA genes of highly pathogenic H5N6 influenza viruses isolated in Vietnam from 2018 to 2021.** Viruses isolated in this study are shown in red. All other viruses are color-coded based on the HA subtype. Bootstrap values greater than 70% are indicated by open diamonds. The scale bar represents the nucleotide substitution rate at each site.

**Supplemental Figure S6. Phylogenetic analysis of the NS1 genes of highly pathogenic H5N6 influenza viruses isolated in Vietnam from 2018 to 2021.** Viruses isolated in this study are shown in red. All other viruses are color-coded based on the HA subtype. Bootstrap values greater than 70% are indicated by open diamonds. The scale bar represents the nucleotide substitution rate at each site.
