# Supplementary material for: Continued Circulation of Highly Pathogenic H5 Influenza Viruses in Vietnamese Live Bird Markets in 2018–2021
Source: Viruses. 2023 Jul 21;15(7):1596. doi: 10.3390/v15071596 (PMC10384249; doi:10.3390/v15071596)
Supplement: Supplementary file 1 [file viruses-15-01596-s001.zip]

Archive with 10 entries (10 files):
- Guan - Supplemental Figure 1 - Submitted.pdf
- Guan - Supplemental Figure 2 - Submitted.pdf
- Guan - Supplemental Figure 3 - Submitted.pdf
- Guan - Supplemental Figure 4 - Submitted.pdf
- Guan - Supplemental Figure 5 - Submitted.pdf
- Guan - Supplemental Figure 6 - Submitted.pdf
- Guan - Supplemental Table 1_071823.xlsx
- Guan - Supplemental Table 2_071823.xlsx
- Guan - Supplemental Table 3_071823.xlsx
- Supplementary Figures_Titles and Legends.pdf
