# Supplementary material for: Continued Circulation of Highly Pathogenic H5 Influenza Viruses in Vietnamese Live Bird Markets in 2018–2021
Source: Viruses. 2023 Jul 21;15(7):1596. doi: 10.3390/v15071596 (PMC10384249; doi:10.3390/v15071596)
Supplement: Supplementary file 1 [file viruses-15-01596-s001.zip › Guan - Supplemental Table 1_071823.xlsx]

## Sheet: HA
We gratefully acknowledge the following authors and the originating and submitting laboratories of the sequences obtained from the GISAID’s EpiFlu™ Database on which this research is based.
All submitters of data may be contacted directly via www.gisaid.org
Supplemental Table 1: List of sequences obtained from the GISAID’s EpiFlu™ Database.
Add titles to tables.	Segment	Country	Collection date	Isolate-ID	Isolate name	Originating Lab	Submitting Lab	Authors
EPI568474	HA	Korea, Republic of	2015-Jan-22	EPI_ISL_173568	A/green-winged teal/Korea/KU-12/2015	Avian diaseases laboratory, College of Veterinary Medicine, Konkuk University	Konkuk University	Jung-Hoon,Kwon; Seong-Su,Yuk; Erdene-Ochir,TO; Jin-Yong,Noh; Jae-Keun,Park; Dong-Hun,Lee; Chang-Seon,Song
EPI595055	HA	Korea, Republic of	2015-Jan-22	EPI_ISL_181080	A/common teal/Korea/KU-12/2015	Avian diaseases laboratory, College of Veterinary Medicine, Konkuk University	Konkuk University	Kwon,Jung-Hoon; Yuk,Seong-Su; Erdene-Ochir,TO; Noh,Jin-Yong; Hong,Woo-Tack; Jeong,Jei-Hyun; Jeong,Sol; Song,Chang-Seon
EPI595066	HA	Korea, Republic of	2015-Jan-29	EPI_ISL_181081	A/mallard/Korea/KU3-2/2015	Avian diaseases laboratory, College of Veterinary Medicine, Konkuk University	Konkuk University	Kwon,Jung-Hoon; Yuk,Seong-Su; Erdene-Ochir,TO; Noh,Jin-Yong; Hong,Woo-Tack; Jeong,Jei-Hyun; Jeong,Sol; Song,Chang-Seon
EPI595079	HA	Korea, Republic of	2015-Feb-06	EPI_ISL_181082	A/mallard/Korea/N15-99/2015	Avian diaseases laboratory, College of Veterinary Medicine, Konkuk University	Konkuk University	Kwon,Jung-Hoon; Yuk,Seong-Su; Erdene-Ochir,TO; Noh,Jin-Yong; Hong,Woo-Tack; Jeong,Jei-Hyun; Jeong,Sol; Song,Chang-Seon
EPI653111	HA	Bhutan	2015-Apr-01	EPI_ISL_198209	A/chicken/Bhutan/04TI01/2015		Import from public-domain	Tosh,C.; Tenzin,D.; Tenzin,S.; Nagarajan,S.; Kumar,M.; Murugkar,H.V.; Tripathi,S.; Wangdi,C.; Dukpa,K.; Gurung,R.B.; Kulkarni,D.D.
EPI668743	HA	China	2015-Feb-09	EPI_ISL_200819	A/chicken/Yunnan/02.09 DQXY008L/2015(H5N6)		Institute of Microbiology, Chinese Academy of Sciences
EPI668751	HA	China	2015-Jul-14	EPI_ISL_200820	A/goose/Yunnan/07.14 DQWCK119/2015(H5N6)		Institute of Microbiology, Chinese Academy of Sciences
EPI668754	HA	China	2015-Jul-14	EPI_ISL_200821	A/goose/Yunnan/07.14 DQWCK122/2015(H5N6)		Institute of Microbiology, Chinese Academy of Sciences
EPI668767	HA	China	2015-Jul-15	EPI_ISL_200822	A/duck/Yunnan/07.15 DQNPH124/2015(H5N6)		Institute of Microbiology, Chinese Academy of Sciences
EPI668768	HA	China	2015-Jul-15	EPI_ISL_200823	A/duck/Yunnan/07.15 DQNPH125/2015(H5N6)		Institute of Microbiology, Chinese Academy of Sciences
EPI668783	HA	China	2015-Jul-15	EPI_ISL_200824	A/duck/Yunnan/07.15 DQNPH127/2015(H5N6)		Institute of Microbiology, Chinese Academy of Sciences
EPI668791	HA	China	2015-Jul-15	EPI_ISL_200825	A/duck/Yunnan/07.15 DQNPH129/2015(H5N6)		Institute of Microbiology, Chinese Academy of Sciences
EPI668823	HA	China	2015-Jul-11	EPI_ISL_200829	A/chicken/Yunnan/07.11 DQENM005/2015(H5N6)		Institute of Microbiology, Chinese Academy of Sciences
EPI669119	HA	Israel	2015-Jun-29	EPI_ISL_200942	A/chicken/Gaza/876/2015		Import from public-domain	Shkoda,I.; Lapin,K.; Simanov,L.; Alnakhal,R.; Lublin,A.
EPI669120	HA	Israel	2015-Jun-24	EPI_ISL_200943	A/chicken/Gaza/870/2015		Import from public-domain	Shkoda,I.; Lapin,K.; Simanov,L.; Alnakhal,R.; Lublin,A.
EPI669121	HA	Israel	2015-Jun-27	EPI_ISL_200944	A/chicken/Gaza/869/2015		Import from public-domain	Shkoda,I.; Lapin,K.; Simanov,L.; Alnakhal,R.; Lublin,A.
EPI669122	HA	Israel	2015-Jun-21	EPI_ISL_200945	A/duck/Gaza/829/2015		Import from public-domain	Shkoda,I.; Lapin,K.; Simanov,L.; Alnakhal,R.; Lublin,A.
EPI669123	HA	Israel	2015-Jun-01	EPI_ISL_200946	A/chicken/Gaza/803/2015		Import from public-domain	Shkoda,I.; Lapin,K.; Simanov,L.; Alnakhal,R.; Lublin,A.
EPI669124	HA	Israel	2015-Jun-15	EPI_ISL_200947	A/chicken/Gaza/799/2015		Import from public-domain	Shkoda,I.; Lapin,K.; Simanov,L.; Alnakhal,R.; Lublin,A.
EPI669125	HA	Israel	2015-Jun-10	EPI_ISL_200948	A/chicken/Gaza/797/2015		Import from public-domain	Shkoda,I.; Lapin,K.; Simanov,L.; Alnakhal,R.; Lublin,A.
EPI669126	HA	Israel	2015-Jun-28	EPI_ISL_200949	A/duck/Gaza/872/2015		Import from public-domain	Shkoda,I.; Lapin,K.; Simanov,L.; Alnakhal,R.; Lublin,A.
EPI669127	HA	Israel	2015-Apr-12	EPI_ISL_200950	A/duck/Gaza/552/2015		Import from public-domain	Shkoda,I.; Lapin,K.; Simanov,L.; Alnakhal,R.; Lublin,A.
EPI669128	HA	Israel	2015-May-18	EPI_ISL_200951	A/turkey/Israel/658/2015		Import from public-domain	Shkoda,I.; Lapin,K.; Simanov,L.; Lublin,A.
EPI669129	HA	Israel	2015-Mar-22	EPI_ISL_200952	A/chicken/Qatanna/468/2015		Import from public-domain	Shkoda,I.; Lapin,K.; Simanov,L.; Lublin,A.
EPI669130	HA	Israel	2015-May-11	EPI_ISL_200953	A/turkey/Israel/633/2015		Import from public-domain	Shkoda,I.; Lapin,K.; Simanov,L.; Lublin,A.
EPI669131	HA	Israel	2015-Jan-16	EPI_ISL_200954	A/turkey/Israel/14/2015		Import from public-domain	Shkoda,I.; Lapin,K.; Simanov,L.; Lublin,A.
EPI669760	HA	China	2015-Jul-14	EPI_ISL_200998	A/Bar-headed Goose/Qinghai/BTY2/2015_H5N1	State Key Laboratory of Virology and Wuhan Institute of Virology, Chinese Academy of Sciences	Institute of Microbiology, Chinese Academy of Sciences	Jianjun, Chen
EPI669768	HA	China	2015-Jul-14	EPI_ISL_200999	A/Great black-headed Gull/Qinghai/YO1/2015_H5N1	State Key Laboratory of Virology and Wuhan Institute of Virology, Chinese Academy of Sciences	Institute of Microbiology, Chinese Academy of Sciences	Jianjun, Chen
EPI669776	HA	China	2015-Jul-14	EPI_ISL_201000	A/Great black-headed Gull/Qinghai/YO6/2015_H5N1	State Key Laboratory of Virology and Wuhan Institute of Virology, Chinese Academy of Sciences	Institute of Microbiology, Chinese Academy of Sciences	Jianjun, Chen
EPI669784	HA	China	2015-May-12	EPI_ISL_201001	A/Black-necked Grebe/Inner Mongolia/Brain1/2015_H5N1	Institute of Pathogen Biology, Taishan Medical College	Institute of Microbiology, Chinese Academy of Sciences	Weifeng, Shi
EPI669792	HA	China	2015-May-12	EPI_ISL_201002	A/Black-necked Grebe/Inner Mongolia/Brain2/2015_H5N1	Institute of Pathogen Biology, Taishan Medical College	Institute of Microbiology, Chinese Academy of Sciences	Weifeng, Shi
EPI669800	HA	China	2015-May-12	EPI_ISL_201003	A/Black-necked Grebe/Inner Mongolia/Lung2/2015_H5N1	Institute of Pathogen Biology, Taishan Medical College	Institute of Microbiology, Chinese Academy of Sciences	Weifeng, Shi
EPI669808	HA	China	2015-May-12	EPI_ISL_201004	A/Black-necked Grebe/Inner Mongolia/Lung3/2015_H5N1	Institute of Pathogen Biology, Taishan Medical College	Institute of Microbiology, Chinese Academy of Sciences	Weifeng, Shi
EPI669816	HA	China	2015-May-12	EPI_ISL_201005	A/Black-necked Grebe/Inner Mongolia/Liver3/2015_H5N1	Institute of Pathogen Biology, Taishan Medical College	Institute of Microbiology, Chinese Academy of Sciences	Weifeng, Shi
EPI669824	HA	China	2015-May-12	EPI_ISL_201006	A/Black-necked Grebe/Inner Mongolia/Brain3/2015_H5N1	CAS Key Laboratory of Pathogenic Microbiology and Immunology, Institute of Microbiology, Chinese Academy of Sciences	Institute of Microbiology, Chinese Academy of Sciences	Yuhai, Bi
EPI669832	HA	China	2015-May-12	EPI_ISL_201007	A/Black-necked Grebe/Inner Mongolia/Lung3-2/2015 H5N1	CAS Key Laboratory of Pathogenic Microbiology and Immunology, Institute of Microbiology, Chinese Academy of Sciences	Institute of Microbiology, Chinese Academy of Sciences	Yuhai, Bi
EPI669840	HA	China	2015-May-12	EPI_ISL_201008	A/Black-necked Grebe/Inner Mongolia/Oropharynx swab3/2015_H5N1	CAS Key Laboratory of Pathogenic Microbiology and Immunology, Institute of Microbiology, Chinese Academy of Sciences	Institute of Microbiology, Chinese Academy of Sciences	Yuhai, Bi
EPI669848	HA	China	2015-May-12	EPI_ISL_201009	A/Black-necked Grebe/Inner Mongolia/Trachea3/2015_H5N1	CAS Key Laboratory of Pathogenic Microbiology and Immunology, Institute of Microbiology, Chinese Academy of Sciences	Institute of Microbiology, Chinese Academy of Sciences	Yuhai, Bi
EPI669856	HA	China	2015-May-12	EPI_ISL_201010	A/Black-necked Grebe/Inner Mongolia/Anal swab4/2015 H5N1	CAS Key Laboratory of Pathogenic Microbiology and Immunology, Institute of Microbiology, Chinese Academy of Sciences	Institute of Microbiology, Chinese Academy of Sciences	Yuhai, Bi
EPI671533	HA	China	2015-May-07	EPI_ISL_201355	A/duck/Fujian/05.07 FZHMDK14-O/2015(H5N6)		Institute of Microbiology, Chinese Academy of Sciences
EPI671541	HA	China	2015-May-07	EPI_ISL_201356	A/duck/Fujian/05.07 FZHMD4K-O/2015(Mixed)		Institute of Microbiology, Chinese Academy of Sciences
EPI671549	HA	China	2015-May-07	EPI_ISL_201357	A/duck/Fujian/05.07 FZHMD7K-O/2015(Mixed)		Institute of Microbiology, Chinese Academy of Sciences
EPI671557	HA	China	2015-May-07	EPI_ISL_201358	A/duck/Fujian/05.07 FZHMD12AK-O/2015(Mixed)		Institute of Microbiology, Chinese Academy of Sciences
EPI671605	HA	China	2015-May-07	EPI_ISL_201364	A/chicken/Fujian/05.07 FZHC11K-O/2015(Mixed)		Institute of Microbiology, Chinese Academy of Sciences
EPI671661	HA	China	2015-Mar-11	EPI_ISL_201371	A/duck/Jiangxi/03.11 NCHJX-15-06/2015(Mixed)	CAS Key Laboratory of Pathogenic Microbiology and Immunology, Institute of Microbiology, Chinese Academy of Sciences	Institute of Microbiology, Chinese Academy of Sciences	Bi, Yuhai
EPI671669	HA	China	2015-Mar-18	EPI_ISL_201372	A/duck/Fujian/03.18 GTFJ-15-10/2015(Mixed)	CAS Key Laboratory of Pathogenic Microbiology and Immunology, Institute of Microbiology, Chinese Academy of Sciences	Institute of Microbiology, Chinese Academy of Sciences	Bi, Yuhai
EPI671677	HA	China	2015-Feb-28	EPI_ISL_201373	A/duck/Zhejiang/02.28 JHZJ-15-04/2015(Mixed)	CAS Key Laboratory of Pathogenic Microbiology and Immunology, Institute of Microbiology, Chinese Academy of Sciences	Institute of Microbiology, Chinese Academy of Sciences	Bi, Yuhai
EPI671685	HA	China	2015-Jan-09	EPI_ISL_201374	A/goose/Jiangxi/01.09 NFJX-15-01/2015(Mixed)	CAS Key Laboratory of Pathogenic Microbiology and Immunology, Institute of Microbiology, Chinese Academy of Sciences	Institute of Microbiology, Chinese Academy of Sciences	Bi, Yuhai
EPI682904	HA	China	2015-Jan-01	EPI_ISL_205108	A/chicken/Wenzhou/HAYXLG01/2015		Import from public-domain	Chen,L.-J.; Lin,X.-D.; Guo,W.-P.; Tian,J.-H.; Zhang,Y.-Z.
EPI682905	HA	China	2015-Jan-01	EPI_ISL_205109	A/chicken/Wenzhou/HAYXLG03/2015		Import from public-domain	Chen,L.-J.; Lin,X.-D.; Guo,W.-P.; Tian,J.-H.; Zhang,Y.-Z.
EPI682909	HA	China	2015-Jan-01	EPI_ISL_205113	A/duck/Wenzhou/HAYXLG10/2015		Import from public-domain	Chen,L.-J.; Lin,X.-D.; Guo,W.-P.; Tian,J.-H.; Zhang,Y.-Z.
EPI682910	HA	China	2015-Jan-01	EPI_ISL_205114	A/duck/Wenzhou/YJYF33/2015		Import from public-domain	Chen,L.-J.; Lin,X.-D.; Guo,W.-P.; Tian,J.-H.; Zhang,Y.-Z.
EPI682911	HA	China	2015-Jan-01	EPI_ISL_205115	A/duck/Wuhan/WHYF02/2015		Import from public-domain	Chen,L.-J.; Lin,X.-D.; Guo,W.-P.; Tian,J.-H.; Zhang,Y.-Z.
EPI682912	HA	China	2015-Jan-01	EPI_ISL_205116	A/duck/Wuhan/WHYF03/2015		Import from public-domain	Chen,L.-J.; Lin,X.-D.; Guo,W.-P.; Tian,J.-H.; Zhang,Y.-Z.
EPI682913	HA	China	2015-Jan-01	EPI_ISL_205117	A/chicken/Wuhan/WHYJ01/2015		Import from public-domain	Chen,L.-J.; Lin,X.-D.; Guo,W.-P.; Tian,J.-H.; Zhang,Y.-Z.
EPI682914	HA	China	2015-Jan-01	EPI_ISL_205118	A/chicken/Wuhan/WHYJ02/2015		Import from public-domain	Chen,L.-J.; Lin,X.-D.; Guo,W.-P.; Tian,J.-H.; Zhang,Y.-Z.
EPI682916	HA	China	2015-Jan-01	EPI_ISL_205120	A/duck/Wuhan/JXYFB22/2015		Import from public-domain	Chen,L.-J.; Lin,X.-D.; Guo,W.-P.; Tian,J.-H.; Zhang,Y.-Z.
EPI682917	HA	China	2015-Jan-01	EPI_ISL_205121	A/duck/Taizhou/TZYG12/2015		Import from public-domain	Chen,L.-J.; Lin,X.-D.; Guo,W.-P.; Tian,J.-H.; Zhang,Y.-Z.
EPI682936	HA	China	2015-Jan-01	EPI_ISL_205139	A/turtledove/Wuhan/HKBJ27/2015		Import from public-domain	Chen,L.-J.; Lin,X.-D.; Guo,W.-P.; Tian,J.-H.; Zhang,Y.-Z.
EPI682937	HA	China	2015-Jan-01	EPI_ISL_205140	A/turtledove/Wuhan/HKBJ43/2015		Import from public-domain	Chen,L.-J.; Lin,X.-D.; Guo,W.-P.; Tian,J.-H.; Zhang,Y.-Z.
EPI682939	HA	China	2015-Jan-01	EPI_ISL_205142	A/turtledove/Wuhan/HKBJ07/2015		Import from public-domain	Chen,L.-J.; Lin,X.-D.; Guo,W.-P.; Tian,J.-H.; Zhang,Y.-Z.
EPI687144	HA	Hong Kong (SAR)	2015-Apr-10	EPI_ISL_205821	A/peregrine_falcon/Hong_Kong/04955/2015	Agriculture, Fisheries and Conservation Department	Agriculture, Fisheries and Conservation Department	LUK, Geraldine SM; LEE, Frances E; IP, Sin-Ming; WAI, Chris KL
EPI687152	HA	Hong Kong (SAR)	2015-Apr-30	EPI_ISL_205823	A/Oriental_magpie_robin/Hong_Kong/06154/2015	Agriculture, Fisheries and Conservation Department	Agriculture, Fisheries and Conservation Department	LUK, Geraldine SM; LEE, Frances E; IP, Sin-Ming; WAI, Chris KL
EPI687154	HA	Hong Kong (SAR)	2015-Nov-18	EPI_ISL_205824	A/Oriental_magpie_robin/Hong_Kong/16759/2015	Agriculture, Fisheries and Conservation Department	Agriculture, Fisheries and Conservation Department	LUK, Geraldine SM; LEE, Frances E; IP, Sin-Ming; WAI, Chris KL
EPI687156	HA	Hong Kong (SAR)	2016-Jan-02	EPI_ISL_205825	A/great_egret/Hong_Kong/00032/2016	Agriculture, Fisheries and Conservation Department	Agriculture, Fisheries and Conservation Department	LUK, Geraldine SM; LEE, Frances E; IP, Sin-Ming; WAI, Chris KL
EPI687431	HA	Iraq	2015-Apr-28	EPI_ISL_205920	A/chicken/Slemani/1/2015		Import from public-domain	Rashid,P.M.A.; Babashekh,M.O.; Marouf,A.S.; Raheem,Z.H.
EPI687523	HA	China	2015-Aug-06	EPI_ISL_205964	A/Chicken/Guangdong/FG594/2015（H5N6）	South China Agricultural University	South China Agricultural University	Wenbao,Qi;Qian,Li;Lihong,Huang;Bo,Li;Weixin,Jia;Chenggang,Xu;Ming,Liao
EPI687539	HA	China	2015-Jan-03	EPI_ISL_205966	A/Goose/ Guangdong /SSLBY/2015（H5N6）	South China Agricultural University	South China Agricultural University	Wenbao,Qi;Qian,Li;Lihong,Huang;Bo,Li;Weixin,Jia;Chenggang,Xu;Ming,Liao
EPI690520	HA	Taiwan	2015-Jan-17	EPI_ISL_206456	A/goose/Taiwan/TNC1/2015		Import from public-domain	Huang,P.Y.; Lee,C.D.; Yip,C.H.; Cheung,C.L.; Yu,G.; Lam,T.T.; Smith,D.K.; Zhu,H.; Guan,Y.; Lee,C.C.; Lam,T.Y.
EPI690528	HA	Taiwan	2015-Jan-17	EPI_ISL_206457	A/goose/Taiwan/TNC2/2015		Import from public-domain	Huang,P.Y.; Lee,C.D.; Yip,C.H.; Cheung,C.L.; Yu,G.; Lam,T.T.; Smith,D.K.; Zhu,H.; Guan,Y.; Lee,C.C.; Lam,T.Y.
EPI690536	HA	Taiwan	2015-Jan-17	EPI_ISL_206458	A/goose/Taiwan/TNC3/2015		Import from public-domain	Huang,P.Y.; Lee,C.D.; Yip,C.H.; Cheung,C.L.; Yu,G.; Lam,T.T.; Smith,D.K.; Zhu,H.; Guan,Y.; Lee,C.C.; Lam,T.Y.
EPI690544	HA	Taiwan	2015-Jan-17	EPI_ISL_206459	A/goose/Taiwan/TNC4/2015		Import from public-domain	Huang,P.Y.; Lee,C.D.; Yip,C.H.; Cheung,C.L.; Yu,G.; Lam,T.T.; Smith,D.K.; Zhu,H.; Guan,Y.; Lee,C.C.; Lam,T.Y.
EPI690552	HA	Taiwan	2015-Jan-17	EPI_ISL_206460	A/goose/Taiwan/TNC5/2015		Import from public-domain	Huang,P.Y.; Lee,C.D.; Yip,C.H.; Cheung,C.L.; Yu,G.; Lam,T.T.; Smith,D.K.; Zhu,H.; Guan,Y.; Lee,C.C.; Lam,T.Y.
EPI690560	HA	Taiwan	2015-Jan-17	EPI_ISL_206461	A/goose/Taiwan/TNC6/2015		Import from public-domain	Huang,P.Y.; Lee,C.D.; Yip,C.H.; Cheung,C.L.; Yu,G.; Lam,T.T.; Smith,D.K.; Zhu,H.; Guan,Y.; Lee,C.C.; Lam,T.Y.
EPI690568	HA	Taiwan	2015-Jan-17	EPI_ISL_206462	A/goose/Taiwan/TNC7/2015		Import from public-domain	Huang,P.Y.; Lee,C.D.; Yip,C.H.; Cheung,C.L.; Yu,G.; Lam,T.T.; Smith,D.K.; Zhu,H.; Guan,Y.; Lee,C.C.; Lam,T.Y.
EPI690576	HA	Taiwan	2015-Jan-17	EPI_ISL_206463	A/goose/Taiwan/TNC8/2015		Import from public-domain	Huang,P.Y.; Lee,C.D.; Yip,C.H.; Cheung,C.L.; Yu,G.; Lam,T.T.; Smith,D.K.; Zhu,H.; Guan,Y.; Lee,C.C.; Lam,T.Y.
EPI690584	HA	Taiwan	2015-Jan-17	EPI_ISL_206464	A/goose/Taiwan/TNC9/2015		Import from public-domain	Huang,P.Y.; Lee,C.D.; Yip,C.H.; Cheung,C.L.; Yu,G.; Lam,T.T.; Smith,D.K.; Zhu,H.; Guan,Y.; Lee,C.C.; Lam,T.Y.
EPI690592	HA	Taiwan	2015-Jan-17	EPI_ISL_206465	A/goose/Taiwan/TNC10/2015		Import from public-domain	Huang,P.Y.; Lee,C.D.; Yip,C.H.; Cheung,C.L.; Yu,G.; Lam,T.T.; Smith,D.K.; Zhu,H.; Guan,Y.; Lee,C.C.; Lam,T.Y.
EPI690600	HA	Taiwan	2015-Jan-17	EPI_ISL_206466	A/goose/Taiwan/TNC11/2015		Import from public-domain	Huang,P.Y.; Lee,C.D.; Yip,C.H.; Cheung,C.L.; Yu,G.; Lam,T.T.; Smith,D.K.; Zhu,H.; Guan,Y.; Lee,C.C.; Lam,T.Y.
EPI690608	HA	Taiwan	2015-Jan-17	EPI_ISL_206467	A/goose/Taiwan/TNC12/2015		Import from public-domain	Huang,P.Y.; Lee,C.D.; Yip,C.H.; Cheung,C.L.; Yu,G.; Lam,T.T.; Smith,D.K.; Zhu,H.; Guan,Y.; Lee,C.C.; Lam,T.Y.
EPI690616	HA	Taiwan	2015-Jan-17	EPI_ISL_206468	A/goose/Taiwan/TNC13/2015		Import from public-domain	Huang,P.Y.; Lee,C.D.; Yip,C.H.; Cheung,C.L.; Yu,G.; Lam,T.T.; Smith,D.K.; Zhu,H.; Guan,Y.; Lee,C.C.; Lam,T.Y.
EPI690624	HA	Taiwan	2015-Jan-17	EPI_ISL_206469	A/goose/Taiwan/TNC14/2015		Import from public-domain	Huang,P.Y.; Lee,C.D.; Yip,C.H.; Cheung,C.L.; Yu,G.; Lam,T.T.; Smith,D.K.; Zhu,H.; Guan,Y.; Lee,C.C.; Lam,T.Y.
EPI690632	HA	Taiwan	2015-Jan-17	EPI_ISL_206470	A/goose/Taiwan/TNO1/2015		Import from public-domain	Huang,P.Y.; Lee,C.D.; Yip,C.H.; Cheung,C.L.; Yu,G.; Lam,T.T.; Smith,D.K.; Zhu,H.; Guan,Y.; Lee,C.C.; Lam,T.Y.
EPI690640	HA	Taiwan	2015-Jan-17	EPI_ISL_206471	A/goose/Taiwan/TNO2/2015		Import from public-domain	Huang,P.Y.; Lee,C.D.; Yip,C.H.; Cheung,C.L.; Yu,G.; Lam,T.T.; Smith,D.K.; Zhu,H.; Guan,Y.; Lee,C.C.; Lam,T.Y.
EPI690648	HA	Taiwan	2015-Jan-17	EPI_ISL_206472	A/goose/Taiwan/TNO3/2015		Import from public-domain	Huang,P.Y.; Lee,C.D.; Yip,C.H.; Cheung,C.L.; Yu,G.; Lam,T.T.; Smith,D.K.; Zhu,H.; Guan,Y.; Lee,C.C.; Lam,T.Y.
EPI690656	HA	Taiwan	2015-Jan-17	EPI_ISL_206473	A/goose/Taiwan/TNO4/2015		Import from public-domain	Huang,P.Y.; Lee,C.D.; Yip,C.H.; Cheung,C.L.; Yu,G.; Lam,T.T.; Smith,D.K.; Zhu,H.; Guan,Y.; Lee,C.C.; Lam,T.Y.
EPI690664	HA	Taiwan	2015-Jan-17	EPI_ISL_206474	A/goose/Taiwan/TNO5/2015		Import from public-domain	Huang,P.Y.; Lee,C.C.; Yip,C.H.; Cheung,C.L.; Yu,G.; Lam,T.Y.; Smith,D.K.; Zhu,H.; Guan,Y.
EPI690672	HA	Taiwan	2015-Jan-17	EPI_ISL_206475	A/goose/Taiwan/TNO6/2015		Import from public-domain	Huang,P.Y.; Lee,C.C.; Yip,C.H.; Cheung,C.L.; Yu,G.; Lam,T.Y.; Smith,D.K.; Zhu,H.; Guan,Y.
EPI690680	HA	Taiwan	2015-Jan-17	EPI_ISL_206476	A/goose/Taiwan/TNO7/2015		Import from public-domain	Huang,P.Y.; Lee,C.D.; Yip,C.H.; Cheung,C.L.; Yu,G.; Lam,T.T.; Smith,D.K.; Zhu,H.; Guan,Y.; Lee,C.C.; Lam,T.Y.
EPI690688	HA	Taiwan	2015-Jan-17	EPI_ISL_206477	A/goose/Taiwan/TNO8/2015		Import from public-domain	Huang,P.Y.; Lee,C.D.; Yip,C.H.; Cheung,C.L.; Yu,G.; Lam,T.T.; Smith,D.K.; Zhu,H.; Guan,Y.; Lee,C.C.; Lam,T.Y.
EPI690696	HA	Taiwan	2015-Jan-17	EPI_ISL_206478	A/goose/Taiwan/TNO9/2015		Import from public-domain	Huang,P.Y.; Lee,C.D.; Yip,C.H.; Cheung,C.L.; Yu,G.; Lam,T.T.; Smith,D.K.; Zhu,H.; Guan,Y.; Lee,C.C.; Lam,T.Y.
EPI690704	HA	Taiwan	2015-Jan-17	EPI_ISL_206479	A/goose/Taiwan/TNO10/2015		Import from public-domain	Huang,P.Y.; Lee,C.D.; Yip,C.H.; Cheung,C.L.; Yu,G.; Lam,T.T.; Smith,D.K.; Zhu,H.; Guan,Y.; Lee,C.C.; Lam,T.Y.
EPI690712	HA	Taiwan	2015-Jan-17	EPI_ISL_206480	A/goose/Taiwan/TNO11/2015		Import from public-domain	Huang,P.Y.; Lee,C.D.; Yip,C.H.; Cheung,C.L.; Yu,G.; Lam,T.T.; Smith,D.K.; Zhu,H.; Guan,Y.; Lee,C.C.; Lam,T.Y.
EPI690720	HA	Taiwan	2015-Jan-17	EPI_ISL_206481	A/goose/Taiwan/TNO12/2015		Import from public-domain	Huang,P.Y.; Lee,C.D.; Yip,C.H.; Cheung,C.L.; Yu,G.; Lam,T.T.; Smith,D.K.; Zhu,H.; Guan,Y.; Lee,C.C.; Lam,T.Y.
EPI690728	HA	Taiwan	2015-Jan-17	EPI_ISL_206482	A/goose/Taiwan/TNO13/2015		Import from public-domain	Huang,P.Y.; Lee,C.D.; Yip,C.H.; Cheung,C.L.; Yu,G.; Lam,T.T.; Smith,D.K.; Zhu,H.; Guan,Y.; Lee,C.C.; Lam,T.Y.
EPI690736	HA	Taiwan	2015-Jan-17	EPI_ISL_206483	A/goose/Taiwan/TNO14/2015		Import from public-domain	Huang,P.Y.; Lee,C.D.; Yip,C.H.; Cheung,C.L.; Yu,G.; Lam,T.T.; Smith,D.K.; Zhu,H.; Guan,Y.; Lee,C.C.; Lam,T.Y.
EPI690744	HA	Taiwan	2015-Jan-17	EPI_ISL_206484	A/goose/Taiwan/TNO15/2015		Import from public-domain	Huang,P.Y.; Lee,C.D.; Yip,C.H.; Cheung,C.L.; Yu,G.; Lam,T.T.; Smith,D.K.; Zhu,H.; Guan,Y.; Lee,C.C.; Lam,T.Y.
EPI690752	HA	Taiwan	2015-Jan-17	EPI_ISL_206485	A/goose/Taiwan/TNO16/2015		Import from public-domain	Huang,P.Y.; Lee,C.D.; Yip,C.H.; Cheung,C.L.; Yu,G.; Lam,T.T.; Smith,D.K.; Zhu,H.; Guan,Y.; Lee,C.C.; Lam,T.Y.
EPI690760	HA	Taiwan	2015-Jan-17	EPI_ISL_206486	A/goose/Taiwan/TNO17/2015		Import from public-domain	Huang,P.Y.; Lee,C.D.; Yip,C.H.; Cheung,C.L.; Yu,G.; Lam,T.T.; Smith,D.K.; Zhu,H.; Guan,Y.; Lee,C.C.; Lam,T.Y.
EPI690768	HA	Taiwan	2015-Jan-17	EPI_ISL_206487	A/goose/Taiwan/TNO18/2015		Import from public-domain	Huang,P.Y.; Lee,C.D.; Yip,C.H.; Cheung,C.L.; Yu,G.; Lam,T.T.; Smith,D.K.; Zhu,H.; Guan,Y.; Lee,C.C.; Lam,T.Y.
EPI690776	HA	Taiwan	2015-Jan-17	EPI_ISL_206488	A/goose/Taiwan/TNO19/2015		Import from public-domain	Huang,P.Y.; Lee,C.D.; Yip,C.H.; Cheung,C.L.; Yu,G.; Lam,T.T.; Smith,D.K.; Zhu,H.; Guan,Y.; Lee,C.C.; Lam,T.Y.
EPI690784	HA	Taiwan	2015-Jan-17	EPI_ISL_206489	A/goose/Taiwan/TNO20/2015		Import from public-domain	Huang,P.Y.; Lee,C.D.; Yip,C.H.; Cheung,C.L.; Yu,G.; Lam,T.T.; Smith,D.K.; Zhu,H.; Guan,Y.; Lee,C.C.; Lam,T.Y.
EPI703985	HA	Vietnam	2015-Nov-11	EPI_ISL_208992	A/muscovy duck/Vietnam/HU3-21/2015		Import from public-domain	Nguyen,T.L.; Okamatsu,M.; Kida,H.; Sakoda,Y.; Hatamachi,J.
EPI703986	HA	Vietnam	2015-Nov-11	EPI_ISL_208993	A/muscovy duck/Vietnam/HU3-159/2015		Import from public-domain	Nguyen,T.L.; Okamatsu,M.; Kida,H.; Sakoda,Y.; Hatamachi,J.
EPI703987	HA	Vietnam	2015-Nov-12	EPI_ISL_208994	A/muscovy duck/Vietnam/HU3-355/2015		Import from public-domain	Nguyen,T.L.; Okamatsu,M.; Kida,H.; Sakoda,Y.; Hatamachi,J.
EPI703988	HA	Vietnam	2015-Nov-26	EPI_ISL_208995	A/duck/Vietnam/HU3-562/2015		Import from public-domain	Nguyen,T.L.; Okamatsu,M.; Kida,H.; Sakoda,Y.; Hatamachi,J.
EPI703989	HA	Vietnam	2015-Nov-12	EPI_ISL_208996	A/chicken/Vietnam/HU3-881/2015		Import from public-domain	Nguyen,T.L.; Okamatsu,M.; Kida,H.; Sakoda,Y.; Hatamachi,J.
EPI703990	HA	Vietnam	2015-Nov-11	EPI_ISL_208997	A/chicken/Vietnam/HU3-1055/2015		Import from public-domain	Nguyen,T.L.; Okamatsu,M.; Kida,H.; Sakoda,Y.; Hatamachi,J.
EPI2580009	HA	China	2015-Jan-06	EPI_ISL_208999	A/whooper swan/Shanxi/17L/2015		Import from public-domain	Su,W.; Xing,C.; Zhao,N.; Luo,J.; Li,Q.; Wu,Y.; Li,M.; Wang,C.; Ding,H.; He,H.
EPI2580010	HA	China	2015-Jan-06	EPI_ISL_209000	A/common pochard/Shanxi/16B/2015		Import from public-domain	Su,W.; Xing,C.; Zhao,N.; Luo,J.; Li,Q.; Wu,Y.; Li,M.; Wang,C.; Ding,H.; He,H.
EPI2580012	HA	China	2015-Jan-06	EPI_ISL_209001	A/whooper swan/Henan/01B/2015		Import from public-domain	Su,W.; Xing,C.; Zhao,N.; Luo,J.; Li,Q.; Wu,Y.; Li,M.; Wang,C.; Ding,H.; He,H.
EPI704002	HA	China	2015-Jan-06	EPI_ISL_209002	A/common pochard/Shanxi/16L/2015		Import from public-domain	Su,W.; Xing,C.; Zhao,N.; Luo,J.; Li,Q.; Wu,Y.; Li,M.; Wang,C.; Ding,H.; He,H.
EPI723077	HA	Vietnam	2015-Jan-20	EPI_ISL_214606	A/chicken/Tien Giang/AI335/2015	National Institute of Animal Health	National Institute of Animal Health	Uchida,Y
EPI723085	HA	Vietnam	2015-Feb-16	EPI_ISL_214607	A/chicken/Tien Giang/AI336/2015	National Institute of Animal Health	National Institute of Animal Health	Uchida,Y
EPI723413	HA	Vietnam	2015-Feb-26	EPI_ISL_214648	A/quail/Tien Giang/AI337/2015	National Institute of Animal Health	National Institute of Animal Health	Uchida,Y
EPI740809	HA	China	2016-Feb-26	EPI_ISL_217879	A/Bean Goose/Hubei/chenhu XVI311-2 /2016_H5N8	State Key Laboratory of Virology and Wuhan Institute of Virology, Chinese Academy of Sciences	Wuhan Institute of Virology
EPI742542	HA	China	2015-Jun-25	EPI_ISL_218200	A/Bar-headed_goose/Qinghai/X402/2015_H5N6	State Key Laboratory of Virology and Wuhan Institute of Virology, Chinese Academy of Sciences	Wuhan Institute of Virology
EPI742550	HA	China	2015-Jun-25	EPI_ISL_218201	A/Bar-headed_goose/Qinghai/X417/2015_H5N6	State Key Laboratory of Virology and Wuhan Institute of Virology, Chinese Academy of Sciences	Wuhan Institute of Virology
EPI742558	HA	China	2015-Jun-25	EPI_ISL_218202	A/Bar-headed_goose/Qinghai/X418-1/2015_H5N6	State Key Laboratory of Virology and Wuhan Institute of Virology, Chinese Academy of Sciences	Wuhan Institute of Virology
EPI742566	HA	China	2015-Jun-25	EPI_ISL_218203	A/Bar-headed_goose/Qinghai/X418-2/2015_H5N6	State Key Laboratory of Virology and Wuhan Institute of Virology, Chinese Academy of Sciences	Wuhan Institute of Virology
EPI742574	HA	China	2015-Jun-25	EPI_ISL_218204	A/Bar-headed_goose/Qinghai/X424/2015_H5N6	State Key Laboratory of Virology and Wuhan Institute of Virology, Chinese Academy of Sciences	Wuhan Institute of Virology
EPI742582	HA	China	2015-Jun-25	EPI_ISL_218205	A/Bar-headed_goose/Qinghai/X428/2015_H5N6	State Key Laboratory of Virology and Wuhan Institute of Virology, Chinese Academy of Sciences	Wuhan Institute of Virology
EPI742590	HA	China	2015-Jun-25	EPI_ISL_218206	A/Bar-headed_goose/Qinghai/X430/2015_H5N6	State Key Laboratory of Virology and Wuhan Institute of Virology, Chinese Academy of Sciences	Wuhan Institute of Virology
EPI742598	HA	China	2015-Jun-25	EPI_ISL_218207	A/Bar-headed_goose/Qinghai/X437/2015_H5N6	State Key Laboratory of Virology and Wuhan Institute of Virology, Chinese Academy of Sciences	Wuhan Institute of Virology
EPI758745	HA	India	2015-Jan-01	EPI_ISL_221346	A/turkey/India/01CA01/2015		Import from public-domain	Tosh,C.; Nagarajan,S.; Kumar,M.; Murugkar,H.V.; Venkatesh,G.; Shukla,S.; Mishra,A.; Mishra,P.; Agarwal,S.; Singh,B.; Dubey,P.; Tripathi,S.; Kulkarni,D.D.
EPI758785	HA	India	2015-Mar-01	EPI_ISL_221351	A/duck/India/03CA01/2015		Import from public-domain	Tosh,C.; Nagarajan,S.; Kumar,M.; Murugkar,H.V.; Venkatesh,G.; Shukla,S.; Mishra,A.; Mishra,P.; Agarwal,S.; Singh,B.; Dubey,P.; Tripathi,S.; Kulkarni,D.D.
EPI758793	HA	India	2015-Apr-01	EPI_ISL_221352	A/chicken/India/04CA17/2015		Import from public-domain	Tosh,C.; Nagarajan,S.; Kumar,M.; Murugkar,H.V.; Venkatesh,G.; Shukla,S.; Mishra,A.; Mishra,P.; Agarwal,S.; Singh,B.; Dubey,P.; Tripathi,S.; Kulkarni,D.D.
EPI759966	HA	China	2016-Jan-01	EPI_ISL_221705	A/duck/Guangdong/01.01 SZSGXJK001-Y /2016	Institute of Microbiology, Chinese Academy of Sciences	Institute of Microbiology, Chinese Academy of Sciences
EPI759974	HA	China	2016-Jan-01	EPI_ISL_221706	A/duck/Guangdong/01.01 SZSGXJK001-G/2016	Institute of Microbiology, Chinese Academy of Sciences	Institute of Microbiology, Chinese Academy of Sciences
EPI759982	HA	China	2016-Jan-01	EPI_ISL_221707	A/duck/Guangdong/01.01 SZSGXJK002-Y/2016	Institute of Microbiology, Chinese Academy of Sciences	Institute of Microbiology, Chinese Academy of Sciences
EPI759991	HA	China	2016-Jan-01	EPI_ISL_221708	A/duck/Guangdong/01.01 SZSGXJK002-G/2016	Institute of Microbiology, Chinese Academy of Sciences	Institute of Microbiology, Chinese Academy of Sciences
EPI760002	HA	China	2016-Jan-01	EPI_ISL_221709	A/duck/Guangdong/01.01 SZSGXJK003-G/2016	Institute of Microbiology, Chinese Academy of Sciences	Institute of Microbiology, Chinese Academy of Sciences
EPI760007	HA	China	2016-Jan-01	EPI_ISL_221710	A/duck/Guangdong/01.01 SZSGXJK004-Y/2016	Institute of Microbiology, Chinese Academy of Sciences	Institute of Microbiology, Chinese Academy of Sciences
EPI760026	HA	China	2016-Jan-01	EPI_ISL_221712	A/duck/Guangdong/01.01 SZSGXJK005-Y/2016	Institute of Microbiology, Chinese Academy of Sciences	Institute of Microbiology, Chinese Academy of Sciences
EPI760034	HA	China	2016-Jan-01	EPI_ISL_221713	A/duck/Guangdong/01.01 SZSGXJK005-G /2016	Institute of Microbiology, Chinese Academy of Sciences	Institute of Microbiology, Chinese Academy of Sciences
EPI760042	HA	China	2016-Jan-01	EPI_ISL_221714	A/duck/Guangdong/01.01 SZSGXJK006-Y/2016	Institute of Microbiology, Chinese Academy of Sciences	Institute of Microbiology, Chinese Academy of Sciences
EPI760050	HA	China	2016-Jan-01	EPI_ISL_221715	A/duck/Guangdong/01.01 SZSGXJK006-G/2016	Institute of Microbiology, Chinese Academy of Sciences	Institute of Microbiology, Chinese Academy of Sciences
EPI760055	HA	China	2016-Jan-01	EPI_ISL_221716	A/duck/Guangdong/01.01 SZSGXJK007-G/2016	Institute of Microbiology, Chinese Academy of Sciences	Institute of Microbiology, Chinese Academy of Sciences
EPI760123	HA	China	2015-Jun-02	EPI_ISL_221724	A/peacock/Yunnan/1/2015		Import from public-domain	Hu,T.; Zhao,H.; Zhang,Y.; Zhang,W.; Kong,Q.; Zhang,Z.; Cui,Q.; Qiu,W.; Deng,B.; Fan,Q.; Zhang,F.
EPI760130	HA	China	2015-Jun-02	EPI_ISL_221725	A/peacock/Yunnan/3/2015		Import from public-domain	Hu,T.; Zhao,H.; Zhang,Y.; Zhang,W.; Kong,Q.; Zhang,Z.; Cui,Q.; Qiu,W.; Deng,B.; Fan,Q.; Zhang,F.
EPI760823	HA	China	2015-Oct-16	EPI_ISL_221885	A/chicken/Guangdong/10.16 SZLGKQHY-072/2015		Institute of Microbiology, Chinese Academy of Sciences
EPI813325	HA	Vietnam	2015-Nov-10	EPI_ISL_230158	A/muscovy duck/LBM803/2015		Import from public-domain	Soda,K.; Nguyen,K.H.; Le,Q.M.; Ito,T.; Maegaki,S.
EPI817157	HA	Vietnam	2015-Nov-10	EPI_ISL_230754	A/muscovy duck/LBM806/2015		Import from public-domain	Soda,K.; Nguyen,K.H.; Le,Q.M.; Ito,T.; Maegaki,S.
EPI817159	HA	Vietnam	2015-Nov-10	EPI_ISL_230755	A/duck/Vietnam/LBM809/2015		Import from public-domain	Soda,K.; Nguyen,K.H.; Le,Q.M.; Ito,T.; Maegaki,S.
EPI2580276	HA	Vietnam	2015-Nov-10	EPI_ISL_230755	A/duck/Vietnam/LBM809/2015		Import from public-domain	Soda,K.; Nguyen,K.H.; Le,Q.M.; Ito,T.; Maegaki,S.
EPI817161	HA	Vietnam	2015-Nov-10	EPI_ISL_230756	A/muscovy duck/Vietnam/LBM810/2015		Import from public-domain	Soda,K.; Nguyen,K.H.; Le,Q.M.; Ito,T.; Maegaki,S.
EPI817163	HA	Vietnam	2015-Nov-10	EPI_ISL_230757	A/muscovy duck/Vietnam/LBM817/2015		Import from public-domain	Soda,K.; Nguyen,K.H.; Le,Q.M.; Ito,T.; Maegaki,S.
EPI817165	HA	Vietnam	2015-Nov-10	EPI_ISL_230758	A/muscovy duck/Vietnam/LBM818/2015		Import from public-domain	Soda,K.; Nguyen,K.H.; Le,Q.M.; Ito,T.; Maegaki,S.
EPI817167	HA	Vietnam	2015-Jan-01	EPI_ISL_230759	A/muscovy duck/Vietnam/LBM823/2015		Import from public-domain	Soda,K.; Nguyen,K.H.; Le,Q.M.; Ito,T.; Maegaki,S.
EPI817169	HA	Vietnam	2015-Nov-10	EPI_ISL_230760	A/duck/Vietnam/LBM812/2015		Import from public-domain	Soda,K.; Nguyen,K.H.; Le,Q.M.; Ito,T.; Maegaki,S.
EPI837297	HA	Lebanon	2016-Jun-01	EPI_ISL_234280	A/chicken/Lebanon/157/2016		Import from public-domain	Ibrahim,E.; Sirawan,A.; El-Bazzal,B.; Kandeil,A.; Ali,M.; Kayali,G.
EPI837306	HA	China	2015-Aug-18	EPI_ISL_234282	A/chicken/Hubei/XG18/2015		Import from public-domain	Zou,Z.
EPI837307	HA	China	2015-Aug-18	EPI_ISL_234283	A/duck/Hubei/XG18/2015		Import from public-domain	Zou,Z.
EPI837308	HA	China	2015-Oct-02	EPI_ISL_234284	A/duck/Hubei/WH18/2015		Import from public-domain	Zou,Z.
EPI837541	HA	Korea, Republic of	2015-Jan-11	EPI_ISL_234329	A/breeder duck/Korea/H2086/2015		Animal and Plant Quarantine Agency (APQA)
EPI837542	HA	Korea, Republic of	2015-Jan-14	EPI_ISL_234330	A/mallard/Korea/H2102/2015		Animal and Plant Quarantine Agency (APQA)
EPI837543	HA	Korea, Republic of	2015-Jan-17	EPI_ISL_234331	A/broiler duck/Korea/H2116/2015		Animal and Plant Quarantine Agency (APQA)
EPI837544	HA	Korea, Republic of	2015-Jan-22	EPI_ISL_234332	A/broiler duck/Korea/H2194/2015		Animal and Plant Quarantine Agency (APQA)
EPI837545	HA	Korea, Republic of	2015-Jan-28	EPI_ISL_234333	A/broiler duck/Korea/H2266/2015		Animal and Plant Quarantine Agency (APQA)
EPI837546	HA	Korea, Republic of	2015-Jan-30	EPI_ISL_234334	A/broiler duck/Korea/H2278/2015		Animal and Plant Quarantine Agency (APQA)
EPI837549	HA	Korea, Republic of	2015-Feb-02	EPI_ISL_234337	A/mallard/Korea/H2304/2015		Animal and Plant Quarantine Agency (APQA)
EPI837550	HA	Korea, Republic of	2015-Feb-05	EPI_ISL_234338	A/mallard/Korea/H2321/2015		Animal and Plant Quarantine Agency (APQA)
EPI837551	HA	Korea, Republic of	2015-Feb-17	EPI_ISL_234339	A/broiler duck/Korea/H2385/2015		Animal and Plant Quarantine Agency (APQA)
EPI837552	HA	Korea, Republic of	2015-Feb-23	EPI_ISL_234340	A/broiler duck/Korea/H2393/2015		Animal and Plant Quarantine Agency (APQA)
EPI837553	HA	Korea, Republic of	2015-Feb-23	EPI_ISL_234341	A/broiler duck/Korea/H2400/2015		Animal and Plant Quarantine Agency (APQA)
EPI837554	HA	Korea, Republic of	2015-Feb-24	EPI_ISL_234342	A/broiler duck/Korea/H2405/2015		Animal and Plant Quarantine Agency (APQA)
EPI837555	HA	Korea, Republic of	2015-Mar-10	EPI_ISL_234343	A/breeder chicken/Korea/H2496/2015		Animal and Plant Quarantine Agency (APQA)
EPI837556	HA	Korea, Republic of	2015-Mar-13	EPI_ISL_234344	A/broiler duck/Korea/H2517/2015		Animal and Plant Quarantine Agency (APQA)
EPI837557	HA	Korea, Republic of	2015-Mar-20	EPI_ISL_234345	A/broiler duck/Korea/H2531/2015		Animal and Plant Quarantine Agency (APQA)
EPI837558	HA	Korea, Republic of	2015-Mar-31	EPI_ISL_234346	A/chicken/Korea/H2553/2015		Animal and Plant Quarantine Agency (APQA)
EPI837559	HA	Korea, Republic of	2015-Apr-03	EPI_ISL_234347	A/chicken/Korea/H2565/2015		Animal and Plant Quarantine Agency (APQA)
EPI837560	HA	Korea, Republic of	2015-Apr-16	EPI_ISL_234348	A/chicken/Korea/H2590/2015		Animal and Plant Quarantine Agency (APQA)
EPI837561	HA	Korea, Republic of	2015-Apr-22	EPI_ISL_234349	A/korean native chicken/Korea/H2598/2015		Animal and Plant Quarantine Agency (APQA)
EPI837562	HA	Korea, Republic of	2015-Apr-30	EPI_ISL_234350	A/broiler duck/Korea/H2606/2015		Animal and Plant Quarantine Agency (APQA)
EPI837563	HA	Korea, Republic of	2015-May-13	EPI_ISL_234351	A/broiler duck/Korea/H2618/2015		Animal and Plant Quarantine Agency (APQA)
EPI837564	HA	Korea, Republic of	2015-May-21	EPI_ISL_234352	A/duck/Korea/H2627/2015		Animal and Plant Quarantine Agency (APQA)
EPI837565	HA	Korea, Republic of	2015-May-22	EPI_ISL_234353	A/duck/Korea/H2628/2015		Animal and Plant Quarantine Agency (APQA)
EPI837566	HA	Korea, Republic of	2015-May-28	EPI_ISL_234354	A/broildr duck/Korea/H2637/2015		Animal and Plant Quarantine Agency (APQA)
EPI837567	HA	Korea, Republic of	2015-May-29	EPI_ISL_234355	A/broiler duck/Korea/H2641/2015		Animal and Plant Quarantine Agency (APQA)
EPI837568	HA	Korea, Republic of	2015-Jun-05	EPI_ISL_234356	A/broiler duck/Korea/H2649/2015		Animal and Plant Quarantine Agency (APQA)
EPI837569	HA	Korea, Republic of	2015-Jun-11	EPI_ISL_234357	A/breeder duck/Korea/H2675/2015		Animal and Plant Quarantine Agency (APQA)
EPI837570	HA	Korea, Republic of	2015-Sep-14	EPI_ISL_234358	A/broiler duck/Korea/H2826/2015		Animal and Plant Quarantine Agency (APQA)
EPI837571	HA	Korea, Republic of	2015-Sep-14	EPI_ISL_234359	A/broiler duck/Korea/H2827/2015		Animal and Plant Quarantine Agency (APQA)
EPI837572	HA	Korea, Republic of	2015-Sep-17	EPI_ISL_234360	A/broiler duck/Korea/LBM334/2015		Animal and Plant Quarantine Agency (APQA)
EPI837573	HA	Korea, Republic of	2015-Sep-20	EPI_ISL_234361	A/mallard/Korea/H2891/2015		Animal and Plant Quarantine Agency (APQA)
EPI837574	HA	Korea, Republic of	2015-Sep-26	EPI_ISL_234362	A/broiler duck/Korea/H2910/2015		Animal and Plant Quarantine Agency (APQA)
EPI837575	HA	Korea, Republic of	2015-Oct-19	EPI_ISL_234363	A/broiler duck/Korea/H3078/2015		Animal and Plant Quarantine Agency (APQA)
EPI837576	HA	Korea, Republic of	2015-Oct-20	EPI_ISL_234364	A/broiler duck/Korea/H3092/2015		Animal and Plant Quarantine Agency (APQA)
EPI837577	HA	Korea, Republic of	2015-Oct-23	EPI_ISL_234365	A/broiler duck/Korea/H3093/2015		Animal and Plant Quarantine Agency (APQA)
EPI837578	HA	Korea, Republic of	2015-Oct-26	EPI_ISL_234366	A/broiler duck/Korea/H3098/2015		Animal and Plant Quarantine Agency (APQA)
EPI837579	HA	Korea, Republic of	2015-Oct-28	EPI_ISL_234367	A/broiler duck/Korea/H3104/2015		Animal and Plant Quarantine Agency (APQA)
EPI837580	HA	Korea, Republic of	2015-Nov-13	EPI_ISL_234368	A/broiler duck/Korea/H3298/2015		Animal and Plant Quarantine Agency (APQA)
EPI837581	HA	Korea, Republic of	2015-Nov-15	EPI_ISL_234369	A/broiler duck/Korea/H3301/2015		Animal and Plant Quarantine Agency (APQA)
EPI837582	HA	Korea, Republic of	2015-Nov-15	EPI_ISL_234370	A/broiler duck/Korea/H3302/2015		Animal and Plant Quarantine Agency (APQA)
EPI837583	HA	Korea, Republic of	2016-Mar-23	EPI_ISL_234371	A/breeder duck/Korea/16AQ17/2016		Animal and Plant Quarantine Agency (APQA)
EPI837584	HA	Korea, Republic of	2016-Apr-05	EPI_ISL_234372	A/duck/Korea/16A02/2016		Animal and Plant Quarantine Agency (APQA)
EPI839170	HA	China	2015-Feb-20	EPI_ISL_234679	A/Syrrhaptes paradoxus/Guangdong/ZH283/2015		Import from public-domain	Kang,Y.; Feng,M.; Ren,T.
EPI860421	HA	Japan	2015-Jul-30	EPI_ISL_237947	A/duck/Japan/AnimalQuarantine-HE72/2015	National Institute of Animal Health	National Institute of Animal Health	Uchida,Y.
EPI860461	HA	Japan	2015-Dec-03	EPI_ISL_237952	A/chicken/Japan/AnimalQuarantine-HE144/2016	National Institute of Animal Health	National Institute of Animal Health	Uchida,Y.
EPI860824	HA	Japan	2015-Jan-01	EPI_ISL_238009	A/chicken/Japan/AnimalQuarantine-HE79/2015	National Institute of Animal Health	National Institute of Animal Health	Uchida,Y.
EPI861484	HA	Korea, Republic of	2016-Oct-28	EPI_ISL_238148	A/Mandarin_duck/Korea/K16-187-3/2016	Avian diaseases laboratory, College of Veterinary Medicine, Konkuk University	Konkuk University	Jung-Hoon, Kwon; Jin-Yong, Noh; Seong-Su, Yuk; Tseren-Ochir, Erdene-Ochir; Woo-Tack, Hong; Jei-Hyun, Jeong; Sol, Jeong; Gyeong-Bin, Gwon; Jiho, Lee; Yujin, Kim; Kyujik, Kim; Junbeom, Kim; Chang-Seon, Song
EPI866077	HA	Korea, Republic of	2016-Nov-20	EPI_ISL_239260	A/chicken/Korea/H23/2016(H5N6)	Animal and Plant Quarantine Agency (O-2015)	Animal and Plant Quarantine Agency (APQA)
EPI866085	HA	Korea, Republic of	2016-Nov-16	EPI_ISL_239261	A/chicken/Korea/HN1/2016(H5N6)		Animal and Plant Quarantine Agency (APQA)
EPI866093	HA	Korea, Republic of	2016-Nov-16	EPI_ISL_239262	A/duck/Korea/ES2/2016(H5N6)		Animal and Plant Quarantine Agency (APQA)
EPI866101	HA	Korea, Republic of	2016-Nov-20	EPI_ISL_239263	A/duck/Korea/H15/2016(H5N6)		Animal and Plant Quarantine Agency (APQA)
EPI866114	HA	Korea, Republic of	2016-Nov-05	EPI_ISL_239266	A/Eurasian eagle owl/Korea/960/2016(H5N6)		Animal and Plant Quarantine Agency (APQA)
EPI866132	HA	Korea, Republic of	2016-Nov-17	EPI_ISL_239269	A/mandarin duck/Korea/WB246/2016(H5N6)		Animal and Plant Quarantine Agency (APQA)
EPI866144	HA	Korea, Republic of	2016-Nov-10	EPI_ISL_239271	A/spot_billed_duck/Korea/WB141/2016(H5N6)		Animal and Plant Quarantine Agency (APQA)
EPI880949	HA	Japan	2016-Dec-27	EPI_ISL_241745	A/chicken/Kumamoto/1-7T/2016		National Institute of Animal Health	Saito, T; Takemae, N
EPI880957	HA	Japan	2016-Dec-22	EPI_ISL_241746	A/black headed gull/Ibaraki/282T/2016		National Institute of Animal Health	Saito, T; Takemae, N
EPI880965	HA	Japan	2016-Dec-20	EPI_ISL_241747	A/black-headed-gull/Ibaraki/267T/2016		National Institute of Animal Health	Saito, T; Takemae, N
EPI880973	HA	Japan	2016-Dec-27	EPI_ISL_241748	A/chicken/Kumamoto/1-1T/2016		National Institute of Animal Health	Saito, T; Takemae, N
EPI880981	HA	Japan	2016-Dec-20	EPI_ISL_241749	A/mute swan/Ibaraki/263T/2016		National Institute of Animal Health	Saito, T; Takemae, N
EPI880989	HA	Japan	2016-Dec-20	EPI_ISL_241750	A/mute swan/Ibaraki/262C/2016		National Institute of Animal Health	Saito, T; Takemae, N
EPI880997	HA	Japan	2016-Dec-27	EPI_ISL_241751	A/chicken/Kumamoto/1-4C/2016		National Institute of Animal Health	Saito, T; Takemae, N
EPI881005	HA	Japan	2016-Dec-28	EPI_ISL_241752	A/whooper swan/Ibaraki/301T/2016		National Institute of Animal Health	Saito, T; Takemae, N
EPI881013	HA	Japan	2016-Dec-26	EPI_ISL_241753	A/black swan/Ibaraki/290C/2016		National Institute of Animal Health	Saito, T; Takemae, N
EPI881021	HA	Japan	2016-Dec-25	EPI_ISL_241754	A/great crested grebe/Ibaraki/286T/2016		National Institute of Animal Health	Saito, T; Takemae, N
EPI881029	HA	Japan	2016-Dec-25	EPI_ISL_241755	A/great crested grebe/Ibaraki/287T/2016		National Institute of Animal Health	Saito, T; Takemae, N
EPI881037	HA	Japan	2016-Dec-18	EPI_ISL_241756	A/mute swan/Ibaraki/252T/2016		National Institute of Animal Health	Saito, T; Takemae, N
EPI881045	HA	Japan	2016-Dec-19	EPI_ISL_241757	A/black swan/Ibaraki/256C/2016		National Institute of Animal Health	Saito, T; Takemae, N
EPI881053	HA	Japan	2016-Dec-19	EPI_ISL_241758	A/chicken/Miyazaki/1-5C/2016		National Institute of Animal Health	Saito, T; Takemae, N
EPI881061	HA	Japan	2016-Dec-26	EPI_ISL_241759	A/black headed gull/Ibaraki/291T/2016		National Institute of Animal Health	Saito, T; Takemae, N
EPI881069	HA	Japan	2016-Dec-27	EPI_ISL_241760	A/chicken/Kumamoto/1-2C/2016		National Institute of Animal Health	Saito, T; Takemae, N
EPI881077	HA	Japan	2016-Dec-27	EPI_ISL_241761	A/chicken/Kumamoto/1-3T/2016		National Institute of Animal Health	Saito, T; Takemae, N
EPI881085	HA	Japan	2016-Dec-30	EPI_ISL_241762	A/black swan/Ibaraki/302C/2016		National Institute of Animal Health	Saito, T; Takemae, N
EPI881093	HA	Japan	2016-Dec-27	EPI_ISL_241763	A/chicken/Kumamoto/1-6T/2016		National Institute of Animal Health	Saito, T; Takemae, N
EPI881101	HA	Japan	2016-Dec-27	EPI_ISL_241764	A/chicken/Kumamoto/1-7C/2016		National Institute of Animal Health	Saito, T; Takemae, N
EPI881109	HA	Japan	2016-Dec-27	EPI_ISL_241765	A/chicken/Kumamoto/1-4T/2016		National Institute of Animal Health	Saito, T; Takemae, N
EPI881117	HA	Japan	2016-Dec-27	EPI_ISL_241766	A/chicken/Kumamoto/1-5C/2016		National Institute of Animal Health	Saito, T; Takemae, N
EPI881125	HA	Japan	2016-Dec-24	EPI_ISL_241767	A/black headed gull/Ibaraki/284T/2016		National Institute of Animal Health	Saito, T; Takemae, N
EPI881133	HA	Japan	2016-Dec-21	EPI_ISL_241768	A/mute swan/Ibaraki/270T/2016		National Institute of Animal Health	Saito, T; Takemae, N
EPI881141	HA	Japan	2016-Dec-17	EPI_ISL_241769	A/mute swan/Ibaraki/248C/2016		National Institute of Animal Health	Saito, T; Takemae, N
EPI881149	HA	Japan	2016-Dec-27	EPI_ISL_241770	A/chicken/Kumamoto/1-3C/2016		National Institute of Animal Health	Saito, T; Takemae, N
EPI881157	HA	Japan	2016-Dec-21	EPI_ISL_241771	A/black swan/Ibaraki/271C/2016		National Institute of Animal Health	Saito, T; Takemae, N
EPI881165	HA	Japan	2017-Jan-04	EPI_ISL_241772	A/black swan/Ibaraki/310C/2017		National Institute of Animal Health	Saito, T; Takemae, N
EPI881173	HA	Japan	2016-Dec-21	EPI_ISL_241773	A/pochard/Ibaraki/268T/2016		National Institute of Animal Health	Saito, T; Takemae, N
EPI881181	HA	Japan	2016-Dec-27	EPI_ISL_241774	A/chicken/Kumamoto/1-1C/2016		National Institute of Animal Health	Saito, T; Takemae, N
EPI881189	HA	Japan	2016-Dec-27	EPI_ISL_241775	A/chicken/Kumamoto/1-2T/2016		National Institute of Animal Health	Saito, T; Takemae, N
EPI881197	HA	Japan	2016-Dec-26	EPI_ISL_241776	A/black headed gull/Ibaraki/289T/2016		National Institute of Animal Health	Saito, T; Takemae, N
EPI881205	HA	Japan	2016-Dec-28	EPI_ISL_241777	A/great crested grebe/Ibaraki/298C/2016		National Institute of Animal Health	Saito, T; Takemae, N
EPI881213	HA	Japan	2016-Dec-22	EPI_ISL_241778	A/muteswan/Ibaraki/277T/2016		National Institute of Animal Health	Saito, T; Takemae, N
EPI881221	HA	Japan	2016-Dec-27	EPI_ISL_241779	A/chicken/Kumamoto/1-5T/2016		National Institute of Animal Health	Saito, T.; Takemae, N.
EPI885284	HA	Japan	2017-Jan-14	EPI_ISL_242401	A/chicken/Gifu/1-1T/2017		National Institute of Animal Health	Saito, T; Uchida, Y
EPI885300	HA	Japan	2017-Jan-14	EPI_ISL_242403	A/chicken/Gifu/1-1C/2017		National Institute of Animal Health	Saito, T; Uchida, Y
EPI885308	HA	Japan	2017-Jan-14	EPI_ISL_242404	A/chicken/Gifu/1-10C/2017		National Institute of Animal Health	Saito, T; Uchida, Y
EPI885316	HA	Japan	2017-Jan-11	EPI_ISL_242405	A/whooper swan/Ibaraki/331C/2017		National Institute of Animal Health	Saito, T; Uchida, Y
EPI885324	HA	Japan	2017-Jan-16	EPI_ISL_242406	A/black swan/Ibaraki/341C/2017		National Institute of Animal Health	Saito, T; Uchida, Y
EPI885332	HA	Japan	2017-Jan-14	EPI_ISL_242407	A/chicken/Gifu/1-2T/2017		National Institute of Animal Health	Saito, T; Uchida, Y
EPI885340	HA	Japan	2017-Jan-14	EPI_ISL_242408	A/chicken/Gifu/1-10T/2017		National Institute of Animal Health	Saito, T; Uchida, Y
EPI885348	HA	Japan	2017-Jan-14	EPI_ISL_242409	A/chicken/Gifu/1-6C/2017		National Institute of Animal Health	Saito, T; Uchida, Y
EPI885364	HA	Japan	2017-Jan-14	EPI_ISL_242411	A/chicken/Gifu/1-6T/2017		National Institute of Animal Health	Saito, T; Uchida, Y
EPI885372	HA	Japan	2017-Jan-14	EPI_ISL_242412	A/chicken/Gifu/1-9C/2017		National Institute of Animal Health	Saito, T; Uchida, Y
EPI885380	HA	Japan	2017-Jan-14	EPI_ISL_242413	A/chicken/Gifu/1-8C/2017		National Institute of Animal Health	Saito, T; Uchida, Y
EPI885388	HA	Japan	2017-Jan-14	EPI_ISL_242414	A/chicken/Gifu/1-2C/2017		National Institute of Animal Health	Saito, T; Uchida, Y
EPI885396	HA	Japan	2017-Jan-16	EPI_ISL_242415	A/black swan/Ibaraki/341T/2017		National Institute of Animal Health	Saito, T; Uchida, Y
EPI886593	HA	Japan	2016-Dec-27	EPI_ISL_242666	A/chicken/Kumamoto/1-6C/2016		National Institute of Animal Health	Saito, T.; Takemae, N.
EPI888441	HA	Japan	2016-Nov-06	EPI_ISL_242903	A/Northern Pintail/Tottori/b37/2016		Import from public-domain	Takakuwa,H.
EPI888450	HA	Japan	2016-Nov-19	EPI_ISL_243058	A/black swan/Akita/1/2016		Import from public-domain	Okamatsu,M.; Hiono,T.; Matsuno,K.; Kida,H.; Sakoda,Y.
EPI888458	HA	Japan	2016-Nov-19	EPI_ISL_243059	A/black swan/Akita/2/2016		Import from public-domain	Okamatsu,M.; Hiono,T.; Matsuno,K.; Kida,H.; Sakoda,Y.
EPI888466	HA	Japan	2016-Nov-15	EPI_ISL_243060	A/teal/Tottori/1/2016		Import from public-domain	Soda,K.; Usui,T.; Ito,H.; Ozaki,H.; Murase,T.; Yamaguchi,T.; Ito,T.
EPI888474	HA	Japan	2016-Nov-15	EPI_ISL_243061	A/teal/Tottori/2/2016		Import from public-domain	Soda,K.; Ito,H.; Usui,T.; Ozaki,H.; Murase,T.; Yamaguchi,T.; Ito,T.
EPI907034	HA	Japan	2016-Dec-14	EPI_ISL_247371	A/mute swan/Ibaraki/219T/2016	National Institute of Animal Health	National Institute of Animal Health	Takehiko, S
EPI907042	HA	Japan	2016-Dec-14	EPI_ISL_247372	A/mute swan/Ibaraki/220C/2016	National Institute of Animal Health	National Institute of Animal Health	Takehiko, S
EPI907050	HA	Japan	2016-Dec-14	EPI_ISL_247373	A/black headed gull/Ibaraki/194C/2016	National Institute of Animal Health	National Institute of Animal Health	Takehiko, S
EPI907058	HA	Japan	2016-Dec-13	EPI_ISL_247374	A/mute swan/Ibaraki/214C/2016	National Institute of Animal Health	National Institute of Animal Health	Takehiko, S
EPI907066	HA	Japan	2016-Dec-14	EPI_ISL_247375	A/mute swan/Ibaraki/222C/2016	National Institute of Animal Health	National Institute of Animal Health	Takehiko, S
EPI907074	HA	Japan	2016-Dec-10	EPI_ISL_247376	A/mute swan/Ibaraki/208T/2016	National Institute of Animal Health	National Institute of Animal Health	Takehiko, S
EPI907082	HA	Japan	2016-Dec-14	EPI_ISL_247377	A/mute swan/Ibaraki/223C/2016	National Institute of Animal Health	National Institute of Animal Health	Takehiko, S
EPI907114	HA	Japan	2016-Dec-13	EPI_ISL_247381	A/mute swan/Ibaraki/217C/2016	National Institute of Animal Health	National Institute of Animal Health	Takehiko, S
EPI907130	HA	Japan	2016-Dec-08	EPI_ISL_247383	A/mute swan/Ibaraki/202C/2016	National Institute of Animal Health	National Institute of Animal Health	Takehiko, S
EPI907154	HA	Japan	2016-Dec-13	EPI_ISL_247386	A/mute swan/Ibaraki/214T/2016	National Institute of Animal Health	National Institute of Animal Health	Takehiko, S
EPI907162	HA	Japan	2016-Dec-08	EPI_ISL_247387	A/mute swan/Ibaraki/202T/2016	National Institute of Animal Health	National Institute of Animal Health	Takehiko, S
EPI907170	HA	Japan	2016-Dec-14	EPI_ISL_247388	A/mute swan/Ibaraki/222T/2016	National Institute of Animal Health	National Institute of Animal Health	Takehiko, S
EPI907178	HA	Japan	2016-Dec-14	EPI_ISL_247389	A/mute swan/Ibaraki/223T/2016	National Institute of Animal Health	National Institute of Animal Health	Takehiko, S
EPI907186	HA	Japan	2016-Dec-14	EPI_ISL_247390	A/mute swan/Ibaraki/218T/2016	National Institute of Animal Health	National Institute of Animal Health	Takehiko, S
EPI907194	HA	Japan	2016-Dec-13	EPI_ISL_247391	A/mute swan/Ibaraki/217T/2016	National Institute of Animal Health	National Institute of Animal Health	Takehiko, S
EPI907218	HA	Japan	2016-Nov-29	EPI_ISL_247394	A/whooper swan/Ibaraki/188C/2016	National Institute of Animal Health	National Institute of Animal Health	Takehiko, S
EPI907266	HA	Japan	2016-Dec-10	EPI_ISL_247400	A/mute swan/Ibaraki/210T/2016	National Institute of Animal Health	National Institute of Animal Health	Takehiko, S
EPI907274	HA	Japan	2016-Dec-14	EPI_ISL_247401	A/mute swan/Ibaraki/221C/2016	National Institute of Animal Health	National Institute of Animal Health	Takehiko, S
EPI907282	HA	Japan	2016-Dec-14	EPI_ISL_247402	A/mute swan/Ibaraki/219C/2016	National Institute of Animal Health	National Institute of Animal Health	Takehiko, S
EPI907298	HA	Japan	2016-Dec-11	EPI_ISL_247404	A/mute swan/Ibaraki/210C/2016	National Institute of Animal Health	National Institute of Animal Health	Takehiko, S
EPI907306	HA	Japan	2016-Dec-14	EPI_ISL_247405	A/mute swan/Ibaraki/220T/2016	National Institute of Animal Health	National Institute of Animal Health	Takehiko, S
EPI907314	HA	Japan	2016-Dec-06	EPI_ISL_247406	A/black headed gull/Ibaraki/194T/2016	National Institute of Animal Health	National Institute of Animal Health	Takehiko, S
EPI907322	HA	Japan	2016-Dec-14	EPI_ISL_247407	A/mute swan/Ibaraki/218C/2016	National Institute of Animal Health	National Institute of Animal Health	Takehiko, S
EPI956143	HA	China	2015-Dec-19	EPI_ISL_255389	A/chicken/Anhui/AH325/2015		Wuhan Institute of Virology
EPI959114	HA	China	2015-Dec-19	EPI_ISL_255412	A/chicken/Hunan/HN158/2015		Wuhan Institute of Virology
EPI956202	HA	China	2015-Sep-13	EPI_ISL_255413	A/chicken/Hunan/HN244/2015		Wuhan Institute of Virology
EPI956210	HA	China	2015-Sep-13	EPI_ISL_255414	A/chicken/Hunan/HN245/2015		Wuhan Institute of Virology
EPI956218	HA	China	2015-Sep-13	EPI_ISL_255415	A/chicken/Hunan/HN247/2015		Wuhan Institute of Virology
EPI956238	HA	China	2015-Sep-13	EPI_ISL_255416	A/chicken/Hunan/HN248/2015		Wuhan Institute of Virology
EPI956246	HA	China	2015-Sep-13	EPI_ISL_255417	A/chicken/Hunan/HN249/2015		Wuhan Institute of Virology
EPI956254	HA	China	2015-Sep-13	EPI_ISL_255418	A/chicken/Hunan/HN250/2015		Wuhan Institute of Virology
EPI956262	HA	China	2015-Sep-13	EPI_ISL_255419	A/chicken/Hunan/HN251/2015		Wuhan Institute of Virology
EPI956270	HA	China	2015-Sep-13	EPI_ISL_255420	A/chicken/Hunan/HN252/2015		Wuhan Institute of Virology
EPI956290	HA	China	2015-Sep-13	EPI_ISL_255421	A/chicken/Hunan/HN254/2015		Wuhan Institute of Virology
EPI956298	HA	China	2015-Dec-16	EPI_ISL_255422	A/chicken/Hunan/HN263/2015		Wuhan Institute of Virology
EPI956306	HA	China	2015-Sep-13	EPI_ISL_255423	A/chicken/Hunan/HN255/2015		Wuhan Institute of Virology
EPI956314	HA	China	2015-Dec-17	EPI_ISL_255424	A/chicken/Hunan/HN264/2015		Wuhan Institute of Virology
EPI956322	HA	China	2015-Dec-17	EPI_ISL_255425	A/chicken/Hunan/HN265/2015		Wuhan Institute of Virology
EPI956330	HA	China	2015-Dec-17	EPI_ISL_255426	A/chicken/Hunan/HN266/2015		Wuhan Institute of Virology
EPI956338	HA	China	2015-Dec-17	EPI_ISL_255427	A/chicken/Hunan/HN301/2015		Wuhan Institute of Virology
EPI956346	HA	China	2015-Dec-17	EPI_ISL_255428	A/chicken/Hunan/HN302/2015		Wuhan Institute of Virology
EPI956354	HA	China	2015-Dec-17	EPI_ISL_255429	A/chicken/Hunan/HN303/2015		Wuhan Institute of Virology
EPI956362	HA	China	2015-Dec-17	EPI_ISL_255430	A/chicken/Hunan/HN304/2015		Wuhan Institute of Virology
EPI956413	HA	China	2015-Dec-17	EPI_ISL_255433	A/chicken/Hunan/HN305/2015		Wuhan Institute of Virology
EPI956472	HA	China	2015-Dec-17	EPI_ISL_255466	A/chicken/Hunan/HN306/2015		Wuhan Institute of Virology
EPI956480	HA	China	2015-Dec-17	EPI_ISL_255467	A/chicken/Hunan/HN307/2015		Wuhan Institute of Virology
EPI956488	HA	China	2015-Dec-17	EPI_ISL_255468	A/chicken/Hunan/HN308/2015		Wuhan Institute of Virology
EPI956496	HA	China	2015-Apr-06	EPI_ISL_255469	A/chicken/Hunan/HN40/2015		Wuhan Institute of Virology
EPI956648	HA	China	2015-Apr-06	EPI_ISL_255470	A/chicken/Hunan/HN58/2015		Wuhan Institute of Virology
EPI956656	HA	China	2015-Sep-11	EPI_ISL_255489	A/chicken/Hunan/HN75/2015		Wuhan Institute of Virology
EPI956672	HA	China	2015-Dec-19	EPI_ISL_255491	A/duck/Anhui/AH328/2015		Wuhan Institute of Virology
EPI956982	HA	China	2015-Apr-06	EPI_ISL_255529	A/duck/Hunan/HN13/2015		Wuhan Institute of Virology
EPI956990	HA	China	2015-Apr-06	EPI_ISL_255530	A/duck/Hunan/HN16/2015		Wuhan Institute of Virology
EPI957075	HA	China	2015-Sep-11	EPI_ISL_255534	A/duck/Hunan/HN162/2015		Wuhan Institute of Virology
EPI957118	HA	China	2015-Sep-11	EPI_ISL_255559	A/duck/Hunan/HN163/2015		Wuhan Institute of Virology
EPI957126	HA	China	2015-Sep-11	EPI_ISL_255561	A/duck/Hunan/HN167/2015		Wuhan Institute of Virology
EPI957134	HA	China	2015-Sep-11	EPI_ISL_255562	A/duck/Hunan/HN171/2015		Wuhan Institute of Virology
EPI957142	HA	China	2015-Sep-11	EPI_ISL_255563	A/duck/Hunan/HN172/2015		Wuhan Institute of Virology
EPI957181	HA	China	2015-Sep-11	EPI_ISL_255564	A/duck/Hunan/HN174/2015		Wuhan Institute of Virology
EPI957366	HA	China	2015-Sep-11	EPI_ISL_255587	A/duck/Hunan/HN176/2015		Wuhan Institute of Virology
EPI957374	HA	China	2015-Sep-11	EPI_ISL_255592	A/duck/Hunan/HN177/2015		Wuhan Institute of Virology
EPI957396	HA	China	2015-Sep-11	EPI_ISL_255597	A/duck/Hunan/HN178/2015		Wuhan Institute of Virology
EPI957406	HA	China	2015-Sep-12	EPI_ISL_255599	A/duck/Hunan/HN182/2015		Wuhan Institute of Virology
EPI957414	HA	China	2015-Sep-12	EPI_ISL_255600	A/duck/Hunan/HN183/2015		Wuhan Institute of Virology
EPI957424	HA	China	2015-Sep-12	EPI_ISL_255603	A/duck/Hunan/HN186/2015		Wuhan Institute of Virology
EPI957435	HA	China	2015-Sep-12	EPI_ISL_255605	A/duck/Hunan/HN190/2015		Wuhan Institute of Virology
EPI957448	HA	China	2015-Sep-12	EPI_ISL_255607	A/duck/Hunan/HN191/2015		Wuhan Institute of Virology
EPI957459	HA	China	2015-Sep-12	EPI_ISL_255609	A/duck/Hunan/HN192/2015		Wuhan Institute of Virology
EPI957468	HA	China	2015-Sep-12	EPI_ISL_255610	A/duck/Hunan/HN194/2015		Wuhan Institute of Virology
EPI957478	HA	China	2015-Sep-12	EPI_ISL_255612	A/duck/Hunan/HN195/2015		Wuhan Institute of Virology
EPI957486	HA	China	2015-Sep-12	EPI_ISL_255613	A/duck/Hunan/HN197/2015		Wuhan Institute of Virology
EPI957494	HA	China	2015-Sep-12	EPI_ISL_255614	A/duck/Hunan/HN201/2015		Wuhan Institute of Virology
EPI957502	HA	China	2015-Sep-12	EPI_ISL_255615	A/duck/Hunan/HN204/2015		Wuhan Institute of Virology
EPI957510	HA	China	2015-Sep-12	EPI_ISL_255616	A/duck/Hunan/HN205/2015		Wuhan Institute of Virology
EPI957518	HA	China	2015-Sep-12	EPI_ISL_255617	A/duck/Hunan/HN206/2015		Wuhan Institute of Virology
EPI957526	HA	China	2015-Sep-12	EPI_ISL_255618	A/duck/Hunan/HN207/2015		Wuhan Institute of Virology
EPI957534	HA	China	2015-Sep-12	EPI_ISL_255619	A/duck/Hunan/HN208/2015		Wuhan Institute of Virology
EPI957542	HA	China	2015-Sep-13	EPI_ISL_255620	A/duck/Hunan/HN209/2015		Wuhan Institute of Virology
EPI957561	HA	China	2015-Sep-13	EPI_ISL_255621	A/duck/Hunan/HN210/2015		Wuhan Institute of Virology
EPI957569	HA	China	2015-Sep-13	EPI_ISL_255624	A/duck/Hunan/HN212/2015		Wuhan Institute of Virology
EPI974363	HA	Iran, Islamic Republic of	2016-Nov-21	EPI_ISL_258595	A/chicken/Iran/Tehran-F-1/2016		Import from public-domain	Ghalyanchilangeroudi,A.; Ghafouri,S.A.; Maghsoudloo,H.; Khaltabadifarahani,R.; Abdolahi,H.; Tehrani,F.; Fallah,M.H.
EPI974364	HA	Iran, Islamic Republic of	2016-Nov-21	EPI_ISL_258596	A/chicken/Iran/Tehran-F-2/2016		Import from public-domain	Ghalyanchilangeroudi,A.; Ghafouri,S.A.; Maghsoudloo,H.; Khaltabadifarahani,R.; Abdolahi,H.; Tehrani,F.; Fallah,M.H.
EPI974645	HA	Vietnam	2016-Feb-11	EPI_ISL_258752	A/chicken/TP.Can Tho/AI422/2016	National Institute of Animal Health	National Institute of Animal Health	Uchida,Y.
EPI974653	HA	Vietnam	2015-Sep-12	EPI_ISL_258753	A/quail/Quang Nam/AI440/2015	National Institute of Animal Health	National Institute of Animal Health	Uchida,Y.
EPI974661	HA	Vietnam	2015-Nov-16	EPI_ISL_258754	A/duck/Quang Ngai/AI437/2015	National Institute of Animal Health	National Institute of Animal Health	Uchida,Y.
EPI974669	HA	Vietnam	2015-Aug-21	EPI_ISL_258755	A/quail/Quang Ngai/AI/431/2015	National Institute of Animal Health	National Institute of Animal Health	Uchida,Y.
EPI974677	HA	Vietnam	2016-Dec-12	EPI_ISL_258756	A/chicken/Dak Lak/AI428/2016	National Institute of Animal Health	National Institute of Animal Health	Uchida,Y.
EPI974685	HA	Vietnam	2016-Aug-01	EPI_ISL_258757	A/chicken/Tien Giang/AI429/2016	National Institute of Animal Health	National Institute of Animal Health	Uchida,Y.
EPI974693	HA	Vietnam	2015-Aug-21	EPI_ISL_258758	A/duck/Quang Ngai/AI432/2015	National Institute of Animal Health	National Institute of Animal Health	Uchida,Y.
EPI974701	HA	Vietnam	2015-Nov-11	EPI_ISL_258759	A/duck/Quang Ngai/AI436/2015	National Institute of Animal Health	National Institute of Animal Health	Uchida,Y.
EPI974709	HA	Vietnam	2016-Apr-26	EPI_ISL_258760	A/chicken/TP.Can Tho/AI423/2016	National Institute of Animal Health	National Institute of Animal Health	Uchida,Y.
EPI974717	HA	Vietnam	2015-Sep-21	EPI_ISL_258761	A/duck/Quang Ngai/AI435/2015	National Institute of Animal Health	National Institute of Animal Health	Uchida,Y.
EPI974725	HA	Vietnam	2015-Sep-12	EPI_ISL_258762	A/quail/Quang Nam/AI439/2015	National Institute of Animal Health	National Institute of Animal Health	Uchida,Y.
EPI974733	HA	Vietnam	2016-Nov-09	EPI_ISL_258763	A/chicken/Dak Lak/AI427/2016	National Institute of Animal Health	National Institute of Animal Health	Uchida,Y.
EPI974741	HA	Vietnam	2015-Sep-12	EPI_ISL_258764	A/quail/Quang Nam/AI441/2015	National Institute of Animal Health	National Institute of Animal Health	Uchida,Y.
EPI974749	HA	Vietnam	2015-Aug-30	EPI_ISL_258765	A/duck/Khanh Hoa/AI433/2015	National Institute of Animal Health	National Institute of Animal Health	Uchida,Y.
EPI974757	HA	Vietnam	2015-Jul-27	EPI_ISL_258766	A/duck/Quang Ngai/AI430/2015	National Institute of Animal Health	National Institute of Animal Health	Uchida,Y.
EPI974765	HA	Vietnam	2016-Sep-22	EPI_ISL_258767	A/duck/Ca Mau/AI424/2016	National Institute of Animal Health	National Institute of Animal Health	Uchida,Y.
EPI974773	HA	Vietnam	2016-Jan-05	EPI_ISL_258768	A/chicken/Quang Ngai/AI442/2016	National Institute of Animal Health	National Institute of Animal Health	Uchida,Y.
EPI974781	HA	Vietnam	2016-Jun-17	EPI_ISL_258769	A/chicken/Quang Ngai/AI445/2016	National Institute of Animal Health	National Institute of Animal Health	Uchida,Y.
EPI974789	HA	Vietnam	2016-Jun-30	EPI_ISL_258770	A/duck/Quang Ngai/AI446/2016	National Institute of Animal Health	National Institute of Animal Health	Uchida,Y.
EPI974797	HA	Vietnam	2016-Aug-24	EPI_ISL_258771	A/chicken/Quang Ngai/AI449/2016	National Institute of Animal Health	National Institute of Animal Health	Uchida,Y.
EPI974805	HA	Vietnam	2016-Sep-26	EPI_ISL_258772	A/chicken/Quang Ngai/AI451/2016	National Institute of Animal Health	National Institute of Animal Health	Uchida,Y.
EPI974813	HA	Vietnam	2016-Jul-19	EPI_ISL_258773	A/chicken/Quang Ngai/AI447/2016	National Institute of Animal Health	National Institute of Animal Health	Uchida,Y.
EPI974821	HA	Vietnam	2016-Jan-18	EPI_ISL_258774	A/chicken/Quang Ngai/AI443/2016	National Institute of Animal Health	National Institute of Animal Health	Uchida,Y.
EPI974829	HA	Vietnam	2016-Jan-21	EPI_ISL_258775	A/duck/Quang Ngai/AI444/2016	National Institute of Animal Health	National Institute of Animal Health	Uchida,Y.
EPI974837	HA	Vietnam	2016-Jul-09	EPI_ISL_258776	A/chicken/Quang Ngai/AI450/2016	National Institute of Animal Health	National Institute of Animal Health	Uchida,Y.
EPI974845	HA	Vietnam	2016-Jul-27	EPI_ISL_258777	A/chicken/Quang Ngai/AI448/2016	National Institute of Animal Health	National Institute of Animal Health	Uchida,Y.
EPI1006680	HA	Korea, Republic of	2016-Dec-15	EPI_ISL_266417	A/common teal/Korea/W547/2016		Import from public-domain	Kim,Y.-I.; Park,S.-J.; Kwon,H.-I.; Kim,E.-H.; Si,Y.-J.; Jeong,J.H.; Lee,I.-W.; Hiep,D.N.; Kwon,J.-J.; Choi,W.S.; Song,M.-S.; Kim,C.-J.; Choi,Y.-K.
EPI1006681	HA	Korea, Republic of	2016-Dec-15	EPI_ISL_266418	A/common teal/Korea/W549/2016		Import from public-domain	Kim,Y.-I.; Park,S.-J.; Kwon,H.-I.; Kim,E.-H.; Si,Y.-J.; Jeong,J.H.; Lee,I.-W.; Hiep,D.N.; Kwon,J.-J.; Choi,W.S.; Song,M.-S.; Kim,C.-J.; Choi,Y.-K.
EPI1006703	HA	Korea, Republic of	2016-Dec-15	EPI_ISL_266419	A/common teal/Korea/W548/2016		Import from public-domain	Kim,Y.-I.; Park,S.-J.; Kwon,H.-I.; Kim,E.-H.; Si,Y.-J.; Jeong,J.H.; Lee,I.-W.; Hiep,D.N.; Kwon,J.-J.; Choi,W.S.; Song,M.-S.; Kim,C.-J.; Choi,Y.-K.
EPI1006704	HA	Korea, Republic of	2016-Dec-15	EPI_ISL_266420	A/common teal/Korea/W550/2016		Import from public-domain	Kim,Y.-I.; Park,S.-J.; Kwon,H.-I.; Kim,E.-H.; Si,Y.-J.; Jeong,J.H.; Lee,I.-W.; Hiep,D.N.; Kwon,J.-J.; Choi,W.S.; Song,M.-S.; Kim,C.-J.; Choi,Y.-K.
EPI1006705	HA	Korea, Republic of	2017-Jan-04	EPI_ISL_266421	A/common teal/Korea/W555/2017		Import from public-domain	Kim,Y.-I.; Park,S.-J.; Kwon,H.-I.; Kim,E.-H.; Si,Y.-J.; Jeong,J.H.; Lee,I.-W.; Hiep,D.N.; Kwon,J.-J.; Choi,W.S.; Song,M.-S.; Kim,C.-J.; Choi,Y.-K.
EPI1006736	HA	Korea, Republic of	2017-Jan-04	EPI_ISL_266424	A/common teal/Korea/W558/2017		Import from public-domain	Kim,Y.-I.; Park,S.-J.; Kwon,H.-I.; Kim,E.-H.; Si,Y.-J.; Jeong,J.H.; Lee,I.-W.; Hiep,D.N.; Kwon,J.-J.; Choi,W.S.; Song,M.-S.; Kim,C.-J.; Choi,Y.-K.
EPI1006737	HA	Korea, Republic of	2017-Jan-04	EPI_ISL_266425	A/common teal/Korea/W559/2017		Import from public-domain	Kim,Y.-I.; Park,S.-J.; Kwon,H.-I.; Kim,E.-H.; Si,Y.-J.; Jeong,J.H.; Lee,I.-W.; Hiep,D.N.; Kwon,J.-J.; Choi,W.S.; Song,M.-S.; Kim,C.-J.; Choi,Y.-K.
EPI1006847	HA	China	2015-Feb-28	EPI_ISL_266437	A/chicken/Jiangsu/YB7/2015		Import from public-domain	Hao,X.; Wang,X.; Liu,K.; Gu,M.; Hu,J.; Liu,X.
EPI1009407	HA	Indonesia	2016-Mar-29	EPI_ISL_266789	A/duck/Lumajang/04160417/2016		Import from public-domain	Wibawa,H.; Poermadjaja,B.; Mulyawan,H.; Dharmawan,R.; Mahawan,T.; Hutagaol,N.M.; Miswati,Y.; Srihanto,E.A.; Hartawan,D.H.W.; Hendrawati,F.; Riyadi,A.; Deswarni; Tri Harsono,A.; Hartaningsih,N.; Azhar,M.; Stegemen,A.; Mc Grane,J.; Rasa,F.S.T.
EPI1009278	HA	Indonesia	2016-Mar-30	EPI_ISL_266790	A/duck/Lamongan/04160434/2016		Import from public-domain	Wibawa,H.; Poermadjaja,B.; Mulyawan,H.; Dharmawan,R.; Mahawan,T.; Hutagaol,N.M.; Miswati,Y.; Srihanto,E.A.; Hartawan,D.H.W.; Hendrawati,F.; Riyadi,A.; Deswarni; Tri Harsono,A.; Hartaningsih,N.; Azhar,M.; Stegemen,A.; Mc Grane,J.; Rasa,F.S.T.
EPI1009286	HA	Indonesia	2016-Apr-05	EPI_ISL_266791	A/chicken/Kediri/04160512/2016		Import from public-domain	Wibawa,H.; Poermadjaja,B.; Mulyawan,H.; Dharmawan,R.; Mahawan,T.; Hutagaol,N.M.; Miswati,Y.; Srihanto,E.A.; Hartawan,D.H.W.; Hendrawati,F.; Riyadi,A.; Deswarni; Tri Harsono,A.; Hartaningsih,N.; Azhar,M.; Stegemen,A.; Mc Grane,J.; Rasa,F.S.T.
EPI1009294	HA	Indonesia	2016-Mar-30	EPI_ISL_266792	A/chicken/Pati/04160433/2016		Import from public-domain	Wibawa,H.; Poermadjaja,B.; Mulyawan,H.; Dharmawan,R.; Mahawan,T.; Hutagaol,N.M.; Miswati,Y.; Srihanto,E.A.; Hartawan,D.H.W.; Hendrawati,F.; Riyadi,A.; Deswarni; Tri Harsono,A.; Hartaningsih,N.; Azhar,M.; Stegemen,A.; Mc Grane,J.; Rasa,F.S.T.
EPI1009302	HA	Indonesia	2016-Mar-30	EPI_ISL_266793	A/chicken/Lamongan/04160418/2016		Import from public-domain	Wibawa,H.; Poermadjaja,B.; Mulyawan,H.; Dharmawan,R.; Mahawan,T.; Hutagaol,N.M.; Miswati,Y.; Srihanto,E.A.; Hartawan,D.H.W.; Hendrawati,F.; Riyadi,A.; Deswarni; Tri Harsono,A.; Hartaningsih,N.; Azhar,M.; Stegemen,A.; Mc Grane,J.; Rasa,F.S.T.
EPI1009310	HA	Indonesia	2016-Apr-01	EPI_ISL_266794	A/chicken/Sukoharjo/04160454/2016		Import from public-domain	Wibawa,H.; Poermadjaja,B.; Mulyawan,H.; Dharmawan,R.; Mahawan,T.; Hutagaol,N.M.; Miswati,Y.; Srihanto,E.A.; Hartawan,D.H.W.; Hendrawati,F.; Riyadi,A.; Deswarni; Tri Harsono,A.; Hartaningsih,N.; Azhar,M.; Stegemen,A.; Mc Grane,J.; Rasa,F.S.T.
EPI1009318	HA	Indonesia	2016-Apr-04	EPI_ISL_266795	A/duck/Sidrap/07160336-3/2016		Import from public-domain	Wibawa,H.; Poermadjaja,B.; Mulyawan,H.; Dharmawan,R.; Mahawan,T.; Hutagaol,N.M.; Miswati,Y.; Srihanto,E.A.; Hartawan,D.H.W.; Hendrawati,F.; Riyadi,A.; Deswarni; Tri Harsono,A.; Hartaningsih,N.; Azhar,M.; Stegemen,A.; Mc Grane,J.; Rasa,F.S.T.
EPI1009326	HA	Indonesia	2016-Feb-01	EPI_ISL_266796	A/chicken/Denpasar/06160095/2016		Import from public-domain	Wibawa,H.; Poermadjaja,B.; Mulyawan,H.; Dharmawan,R.; Mahawan,T.; Hutagaol,N.M.; Miswati,Y.; Srihanto,E.A.; Hartawan,D.H.W.; Hendrawati,F.; Riyadi,A.; Deswarni; Tri Harsono,A.; Hartaningsih,N.; Azhar,M.; Stegemen,A.; Mc Grane,J.; Rasa,F.S.T.
EPI1009335	HA	Indonesia	2016-Apr-04	EPI_ISL_266797	A/muscovy duck/Pekalongan/04160460/2016		Import from public-domain	Wibawa,H.; Poermadjaja,B.; Mulyawan,H.; Dharmawan,R.; Mahawan,T.; Hutagaol,N.M.; Miswati,Y.; Srihanto,E.A.; Hartawan,D.H.W.; Hendrawati,F.; Riyadi,A.; Deswarni; Tri Harsono,A.; Hartaningsih,N.; Azhar,M.; Stegemen,A.; Mc Grane,J.; Rasa,F.S.T.
EPI1009342	HA	Indonesia	2016-Jan-22	EPI_ISL_266798	A/quail/Deliserdang/01160025/2016		Import from public-domain	Wibawa,H.; Poermadjaja,B.; Mulyawan,H.; Dharmawan,R.; Mahawan,T.; Hutagaol,N.M.; Miswati,Y.; Srihanto,E.A.; Hartawan,D.H.W.; Hendrawati,F.; Riyadi,A.; Deswarni; Tri Harsono,A.; Hartaningsih,N.; Azhar,M.; Stegemen,A.; Mc Grane,J.; Rasa,F.S.T.
EPI1009460	HA	Indonesia	2016-Mar-07	EPI_ISL_266799	A/eagle/Jakarta Timur/20616-206-III/2016		Import from public-domain	Wibawa,H.; Poermadjaja,B.; Mulyawan,H.; Dharmawan,R.; Mahawan,T.; Hutagaol,N.M.; Miswati,Y.; Srihanto,E.A.; Hartawan,D.H.W.; Hendrawati,F.; Riyadi,A.; Deswarni; Tri Harsono,A.; Hartaningsih,N.; Azhar,M.; Stegemen,A.; Mc Grane,J.; Rasa,F.S.T.
EPI1009351	HA	Indonesia	2016-Mar-25	EPI_ISL_266800	A/chicken/Majalengka/08160070-001/2016		Import from public-domain	Wibawa,H.; Poermadjaja,B.; Mulyawan,H.; Dharmawan,R.; Mahawan,T.; Hutagaol,N.M.; Miswati,Y.; Srihanto,E.A.; Hartawan,D.H.W.; Hendrawati,F.; Riyadi,A.; Deswarni; Tri Harsono,A.; Hartaningsih,N.; Azhar,M.; Stegemen,A.; Mc Grane,J.; Rasa,F.S.T.
EPI1009359	HA	Indonesia	2016-Mar-18	EPI_ISL_266801	A/chicken/Kuningan/08160178-003/2016		Import from public-domain	Wibawa,H.; Poermadjaja,B.; Mulyawan,H.; Dharmawan,R.; Mahawan,T.; Hutagaol,N.M.; Miswati,Y.; Srihanto,E.A.; Hartawan,D.H.W.; Hendrawati,F.; Riyadi,A.; Deswarni; Tri Harsono,A.; Hartaningsih,N.; Azhar,M.; Stegemen,A.; Mc Grane,J.; Rasa,F.S.T.
EPI1009367	HA	Indonesia	2016-Jan-08	EPI_ISL_266802	A/chicken/Subang/08160018-002/2016		Import from public-domain	Wibawa,H.; Poermadjaja,B.; Mulyawan,H.; Dharmawan,R.; Mahawan,T.; Hutagaol,N.M.; Miswati,Y.; Srihanto,E.A.; Hartawan,D.H.W.; Hendrawati,F.; Riyadi,A.; Deswarni; Tri Harsono,A.; Hartaningsih,N.; Azhar,M.; Stegemen,A.; Mc Grane,J.; Rasa,F.S.T.
EPI1009375	HA	Indonesia	2016-Mar-03	EPI_ISL_266803	A/duck/Sukoharjo/04160290/2016		Import from public-domain	Wibawa,H.; Poermadjaja,B.; Mulyawan,H.; Dharmawan,R.; Mahawan,T.; Hutagaol,N.M.; Miswati,Y.; Srihanto,E.A.; Hartawan,D.H.W.; Hendrawati,F.; Riyadi,A.; Deswarni; Tri Harsono,A.; Hartaningsih,N.; Azhar,M.; Stegemen,A.; Mc Grane,J.; Rasa,F.S.T.
EPI1009383	HA	Indonesia	2016-Mar-08	EPI_ISL_266804	A/chicken/Sleman/04160326/2016		Import from public-domain	Wibawa,H.; Poermadjaja,B.; Mulyawan,H.; Dharmawan,R.; Mahawan,T.; Hutagaol,N.M.; Miswati,Y.; Srihanto,E.A.; Hartawan,D.H.W.; Hendrawati,F.; Riyadi,A.; Deswarni; Tri Harsono,A.; Hartaningsih,N.; Azhar,M.; Stegemen,A.; Mc Grane,J.; Rasa,F.S.T.
EPI1009391	HA	Indonesia	2016-Mar-14	EPI_ISL_266805	A/chicken/Banyuwangi/04160330/2016		Import from public-domain	Wibawa,H.; Poermadjaja,B.; Mulyawan,H.; Dharmawan,R.; Mahawan,T.; Hutagaol,N.M.; Miswati,Y.; Srihanto,E.A.; Hartawan,D.H.W.; Hendrawati,F.; Riyadi,A.; Deswarni; Tri Harsono,A.; Hartaningsih,N.; Azhar,M.; Stegemen,A.; Mc Grane,J.; Rasa,F.S.T.
EPI1009399	HA	Indonesia	2016-Mar-29	EPI_ISL_266806	A/duck/Klaten/04160386/2016		Import from public-domain	Wibawa,H.; Poermadjaja,B.; Mulyawan,H.; Dharmawan,R.; Mahawan,T.; Hutagaol,N.M.; Miswati,Y.; Srihanto,E.A.; Hartawan,D.H.W.; Hendrawati,F.; Riyadi,A.; Deswarni; Tri Harsono,A.; Hartaningsih,N.; Azhar,M.; Stegemen,A.; Mc Grane,J.; Rasa,F.S.T.
EPI1009412	HA	Indonesia	2015-Nov-24	EPI_ISL_266807	A/quail/Sukoharjo/04152003/2015		Import from public-domain	Wibawa,H.; Poermadjaja,B.; Mulyawan,H.; Dharmawan,R.; Mahawan,T.; Hutagaol,N.M.; Miswati,Y.; Srihanto,E.A.; Hartawan,D.H.W.; Hendrawati,F.; Riyadi,A.; Deswarni; Tri Harsono,A.; Hartaningsih,N.; Azhar,M.; Stegemen,A.; Mc Grane,J.; Rasa,F.S.T.
EPI1009444	HA	Indonesia	2016-Feb-03	EPI_ISL_266811	A/chicken/Lampung Utara/03160217/2016		Import from public-domain	Wibawa,H.; Poermadjaja,B.; Mulyawan,H.; Dharmawan,R.; Mahawan,T.; Hutagaol,N.M.; Miswati,Y.; Srihanto,E.A.; Hartawan,D.H.W.; Hendrawati,F.; Riyadi,A.; Deswarni; Tri Harsono,A.; Hartaningsih,N.; Azhar,M.; Stegemen,A.; Mc Grane,J.; Rasa,F.S.T.
EPI1009452	HA	Indonesia	2016-Mar-03	EPI_ISL_266812	A/chicken/Lampung Utara/03160218/2016		Import from public-domain	Wibawa,H.; Poermadjaja,B.; Mulyawan,H.; Dharmawan,R.; Mahawan,T.; Hutagaol,N.M.; Miswati,Y.; Srihanto,E.A.; Hartawan,D.H.W.; Hendrawati,F.; Riyadi,A.; Deswarni; Tri Harsono,A.; Hartaningsih,N.; Azhar,M.; Stegemen,A.; Mc Grane,J.; Rasa,F.S.T.
EPI1010130	HA	Japan	2016-Nov-20	EPI_ISL_266939	A/tundra swan/Tottori/3111S001/2016		Import from public-domain	Soda,K.; Usui,T.; Ito,H.; Ozaki,H.; Yamaguchi,T.; Ito,T.
EPI1010138	HA	Japan	2016-Nov-20	EPI_ISL_266940	A/tundra swan/Tottori/3111S002/2016		Import from public-domain	Soda,K.; Usui,T.; Ito,H.; Ozaki,H.; Yamaguchi,T.; Ito,T.
EPI1010149	HA	Japan	2016-Nov-23	EPI_ISL_266941	A/snowy owl/Akita/0051D007/2016		Import from public-domain	Soda,K.; Usui,T.; Ito,H.; Ozaki,H.; Yamaguchi,T.; Ito,T.
EPI1010155	HA	Japan	2016-Nov-23	EPI_ISL_266942	A/snowy owl/Akita/0051D008/2016		Import from public-domain	Soda,K.; Usui,T.; Ito,H.; Ozaki,H.; Yamaguchi,T.; Ito,T.
EPI1010162	HA	Japan	2016-Nov-23	EPI_ISL_266943	A/snowy owl/Akita/0051D010-4/2016		Import from public-domain	Soda,K.; Usui,T.; Ito,H.; Ozaki,H.; Yamaguchi,T.; Ito,T.
EPI1027807	HA	Indonesia	2016-Apr-01	EPI_ISL_270336	A/Mus_Dk/Purwakarta/S49/2016	Eijkman Institute for Molecular Biology	Utrecht University-Central Veterinary Institute	Karo-karo,D; Bodewes,R; Muljono,D; Sriyani,I.Y; Artika,IM; Wibawa,H; Pribadi,ES;Pratomo,W; Diyantoro,D; Sugama,A; Hendrayani,N; Hidayat,A; Daju,D; Kustiawan,I;Citra,A; Stegeman,JA; Koch, G
EPI1027815	HA	Indonesia	2016-Apr-29	EPI_ISL_270337	A/Qu/Purwakarta/S52/2016	Eijkman Institute for Molecular Biology	Utrecht University-Central Veterinary Institute	Karo-karo,D; Bodewes,R; Muljono,D; Sriyani,I.Y; Artika,IM; Wibawa,H; Pribadi,ES;Pratomo,W; Diyantoro,D; Sugama,A; Hendrayani,N; Hidayat,A; Daju,D; Kustiawan,I;Citra,A; Stegeman,JA; Koch, G
EPI1027823	HA	Indonesia	2016-May-03	EPI_ISL_270338	A/Qu/Indramayu/S53/2016	Eijkman Institute for Molecular Biology	Utrecht University-Central Veterinary Institute	Karo-karo,D; Bodewes,R; Muljono,D; Sriyani,I.Y; Artika,IM; Wibawa,H; Pribadi,ES;Pratomo,W; Diyantoro,D; Sugama,A; Hendrayani,N; Hidayat,A; Daju,D; Kustiawan,I;Citra,A; Stegeman,JA; Koch, G
EPI1027831	HA	Indonesia	2016-Jun-27	EPI_ISL_270339	A/Ch/Tasikmalaya/S58/2016	Eijkman Institute for Molecular Biology	Utrecht University-Central Veterinary Institute	Karo-karo,D; Bodewes,R; Muljono,D; Sriyani,I.Y; Artika,IM; Wibawa,H; Pribadi,ES;Pratomo,W; Diyantoro,D; Sugama,A; Hendrayani,N; Hidayat,A; Daju,D; Kustiawan,I;Citra,A; Stegeman,JA; Koch, G
EPI1027847	HA	Indonesia	2016-Jul-25	EPI_ISL_270341	A/Mus_Dk/Indramayu/S60/2016	Eijkman Institute for Molecular Biology	Utrecht University-Central Veterinary Institute	Karo-karo,D; Bodewes,R; Muljono,D; Sriyani,I.Y; Artika,IM; Wibawa,H; Pribadi,ES;Pratomo,W; Diyantoro,D; Sugama,A; Hendrayani,N; Hidayat,A; Daju,D; Kustiawan,I;Citra,A; Stegeman,JA; Koch, G
EPI1027855	HA	Indonesia	2016-Oct-03	EPI_ISL_270342	A/Qu/Subang/S62/2016	Eijkman Institute for Molecular Biology	Utrecht University-Central Veterinary Institute	Karo-karo,D; Bodewes,R; Muljono,D; Sriyani,I.Y; Artika,IM; Wibawa,H; Pribadi,ES;Pratomo,W; Diyantoro,D; Sugama,A; Hendrayani,N; Hidayat,A; Daju,D; Kustiawan,I;Citra,A; Stegeman,JA; Koch, G
EPI1027861	HA	Indonesia	2016-Feb-18	EPI_ISL_270343	A/Mus_Dk/Subang/S32c/2016	Eijkman Institute for Molecular Biology	Utrecht University-Central Veterinary Institute	Karo-karo,D; Bodewes,R; Muljono,D; Sriyani,I.Y; Artika,IM; Wibawa,H; Pribadi,ES;Pratomo,W; Diyantoro,D; Sugama,A; Hendrayani,N; Hidayat,A; Daju,D; Kustiawan,I;Citra,A; Stegeman,JA; Koch, G
EPI1072953	HA	Japan	2016-Nov-19	EPI_ISL_279010	A/crane/Kagoshima/KU-6/2016		Kagoshima University
EPI1072947	HA	Japan	2016-Nov-20	EPI_ISL_279011	A/crane/Kagoshima/KU-8/2016		Kagoshima University
EPI1072940	HA	Japan	2016-Nov-20	EPI_ISL_279012	A/crane/Kagoshima/KU-9/2016		Kagoshima University
EPI1072933	HA	Japan	2016-Nov-20	EPI_ISL_279013	A/duck/Kagoshima/KU-d35/2016		Kagoshima University
EPI1072926	HA	Japan	2016-Nov-20	EPI_ISL_279014	A/duck/Kagoshima/KU-d42/2016		Kagoshima University
EPI1072919	HA	Japan	2016-Nov-20	EPI_ISL_279015	A/duck/Kagoshima/KU-d66/2016		Kagoshima University
EPI1072912	HA	Japan	2016-Nov-20	EPI_ISL_279016	A/duck/Kagoshima/KU-d79/2016		Kagoshima University
EPI1064622	HA	Japan	2016-Nov-21	EPI_ISL_279017	A/crane/Kagoshima/KU-10/2016		Kagoshima University
EPI1064620	HA	Japan	2016-Nov-21	EPI_ISL_279018	A/crane/Kagoshima/KU-12/2016		Kagoshima University
EPI1064619	HA	Japan	2016-Nov-22	EPI_ISL_279019	A/crane/Kagoshima/KU-15/2016		Kagoshima University
EPI1064618	HA	Japan	2016-Nov-22	EPI_ISL_279020	A/crane/Kagoshima/KU-16/2016		Kagoshima University
EPI1064617	HA	Japan	2016-Nov-22	EPI_ISL_279021	A/northern pintail/Kagoshima/KU-23/2016		Kagoshima University
EPI1064616	HA	Japan	2016-Nov-23	EPI_ISL_279022	A/crane/Kagoshima/KU-14/2016		Kagoshima University
EPI1064769	HA	Japan	2016-Nov-23	EPI_ISL_279023	A/eurasian wigeon/Kagoshima/KU-20/2016		Kagoshima University
EPI1064762	HA	Japan	2016-Nov-23	EPI_ISL_279024	A/eurasian wigeon/Kagoshima/KU-21/2016		Kagoshima University
EPI1064755	HA	Japan	2016-Nov-23	EPI_ISL_279025	A/crane/Kagoshima/KU-25/2016		Kagoshima University
EPI1064748	HA	Japan	2016-Nov-23	EPI_ISL_279026	A/crane/Kagoshima/KU-26/2016		Kagoshima University
EPI1064741	HA	Japan	2016-Nov-23	EPI_ISL_279027	A/crane/Kagoshima/KU-27/2016		Kagoshima University
EPI1064734	HA	Japan	2016-Nov-24	EPI_ISL_279028	A/crane/Kagoshima/KU-28/2016		Kagoshima University
EPI1064727	HA	Japan	2016-Nov-24	EPI_ISL_279029	A/eurasian wigeon/Kagoshima/KU-32/2016		Kagoshima University
EPI1064720	HA	Japan	2016-Nov-25	EPI_ISL_279030	A/crane/Kagoshima/KU-31/2016		Kagoshima University
EPI1064713	HA	Japan	2016-Nov-25	EPI_ISL_279031	A/crane/Kagoshima/KU-34/2016		Kagoshima University
EPI1064707	HA	Japan	2016-Nov-26	EPI_ISL_279032	A/crane/Kagoshima/KU-33/2016		Kagoshima University
EPI1064700	HA	Japan	2016-Nov-28	EPI_ISL_279033	A/crane/Kagoshima/KU-37/2016		Kagoshima University
EPI1064693	HA	Japan	2016-Dec-03	EPI_ISL_279034	A/crane/Kagoshima/KU-43/2016		Kagoshima University
EPI1064686	HA	Japan	2016-Dec-03	EPI_ISL_279035	A/crane/Kagoshima/KU-44/2016		Kagoshima University
EPI1064679	HA	Japan	2016-Dec-05	EPI_ISL_279036	A/crane/Kagoshima/KU-45/2016		Kagoshima University
EPI1064672	HA	Japan	2016-Dec-05	EPI_ISL_279037	A/crane/Kagoshima/KU-46/2016		Kagoshima University
EPI1064665	HA	Japan	2016-Dec-06	EPI_ISL_279038	A/crane/Kagoshima/KU-48/2016		Kagoshima University
EPI1064658	HA	Japan	2016-Dec-11	EPI_ISL_279039	A/crane/Kagoshima/KU-52/2016		Kagoshima University
EPI1064651	HA	Japan	2016-Dec-14	EPI_ISL_279040	A/crane/Kagoshima/KU-53/2016		Kagoshima University
EPI1065935	HA	China	2015-Oct-26	EPI_ISL_279178	A/duck/Zhejiang/1026109/2015		Import from public-domain	Wu,H.; Lu,R.; Peng,X.; Cheng,L.; Liu,F.; Wu,N.
EPI1065936	HA	China	2015-Aug-16	EPI_ISL_279179	A/chicken/Zhejiang/81643/2015		Import from public-domain	Wu,H.; Lu,R.; Peng,X.; Cheng,L.; Liu,F.; Wu,N.
EPI1065937	HA	China	2015-Jul-04	EPI_ISL_279180	A/chicken/Zhejiang/7450/2015		Import from public-domain	Wu,H.; Lu,R.; Peng,X.; Cheng,L.; Liu,F.; Wu,N.
EPI1065938	HA	China	2015-May-14	EPI_ISL_279181	A/chicken/Zhejiang/514135/2015		Import from public-domain	Wu,H.; Lu,R.; Peng,X.; Cheng,L.; Liu,F.; Wu,N.
EPI1067645	HA	China	2015-Jan-01	EPI_ISL_279424	A/wildfowl/Shandong/SD01/2015		Import from public-domain	Meng,K.; Wang,Y.; Yuan,X.; Zhang,Y.; Qi,L.
EPI1070025	HA	China	2015-Dec-01	EPI_ISL_279789	A/wildfowl/Shandong/SD03/2015		Import from public-domain	Meng,K.; Wang,Y.; Yuan,X.; Zhang,Y.; Qi,L.
EPI1070026	HA	China	2016-Jan-01	EPI_ISL_279790	A/wildfowl/Shandong/SD04/2016		Import from public-domain	Meng,K.; Wang,Y.; Yuan,X.; Zhang,Y.; Qi,L.
EPI1070030	HA	China	2015-Jan-01	EPI_ISL_279791	A/wildfowl/Shandong/SD02/2015		Import from public-domain	Meng,K.; Wang,Y.; Yuan,X.; Zhang,Y.; Qi,L.
EPI1090091	HA	Vietnam	2015-Nov-07	EPI_ISL_283459	A/chicken/Vietnam/HU4-1312/2015		Import from public-domain	Sakoda,Y.; Okamatsu,M.; Matsuno,K.; Jizou,M.
EPI1090099	HA	Vietnam	2015-Nov-07	EPI_ISL_283460	A/chicken/Vietnam/HU4-1316/2015		Import from public-domain	Sakoda,Y.; Okamatsu,M.; Matsuno,K.; Jizou,M.
EPI1090107	HA	Vietnam	2015-Nov-07	EPI_ISL_283461	A/chicken/Vietnam/HU4-1326/2015		Import from public-domain	Sakoda,Y.; Okamatsu,M.; Matsuno,K.; Jizou,M.
EPI1090115	HA	Vietnam	2015-Nov-07	EPI_ISL_283462	A/chicken/Vietnam/HU4-1328/2015		Import from public-domain	Sakoda,Y.; Okamatsu,M.; Matsuno,K.; Jizou,M.
EPI1091676	HA	China	2016-Jun-22	EPI_ISL_283702	A/Duck/Yunnan/YN-2/2016 (H5N6)	South China Agricultural University	South China Agricultural University	Jiahao, Zhang; Guangjie, Lao; Ronghua, Zhang; Hexing, Wang; Guanming, Su; Bo, Li; Wenbao, Qi; Ming, Liao
EPI1091684	HA	China	2016-Jun-28	EPI_ISL_283703	A/Chicken/Yunnan/YN-3/2016 (H5N6)	South China Agricultural University	South China Agricultural University	Jiahao, Zhang; Guangjie, Lao; Ronghua, Zhang; Hexing, Wang; Guanming, Su; Bo, Li; Wenbao, Qi; Ming, Liao
EPI1091692	HA	China	2015-Sep-16	EPI_ISL_283704	A/Duck/Yunnan/YN-4/2015 (H5N6)	South China Agricultural University	South China Agricultural University	Jiahao, Zhang; Guangjie, Lao; Ronghua, Zhang; Hexing, Wang; Guanming, Su; Bo, Li; Wenbao, Qi; Ming, Liao
EPI1091700	HA	China	2016-Jul-04	EPI_ISL_283705	A/Chicken/Yunnan/YN-7/2016 (H5N6)	South China Agricultural University	South China Agricultural University	Jiahao, Zhang; Guangjie, Lao; Ronghua, Zhang; Hexing, Wang; Guanming, Su; Bo, Li; Wenbao, Qi; Ming, Liao
EPI1093262	HA	China	2016-Sep-22	EPI_ISL_283965	A/Chicken/Yunnan/YN-8/2016 (H5N6)	South China Agricultural University	South China Agricultural University	Jiahao, Zhang; Guangjie, Lao; Ronghua, Zhang; Hexing, Wang; Guanming, Su; Bo, Li; Wenbao, Qi; Ming, Liao
EPI1093270	HA	China	2016-Jan-12	EPI_ISL_283966	A/Duck/Yunnan/YN-9/2016 (H5N6)	South China Agricultural University	South China Agricultural University	Jiahao, Zhang; Guangjie, Lao; Ronghua, Zhang; Hexing, Wang; Guanming, Su; Bo, Li; Wenbao, Qi; Ming, Liao
EPI1093278	HA	China	2015-Nov-24	EPI_ISL_283967	A/Chicken/Yunnan/YN-10/2015 (H5N6)	South China Agricultural University	South China Agricultural University	Jiahao, Zhang; Guangjie, Lao; Ronghua, Zhang; Hexing, Wang; Guanming, Su; Bo, Li; Wenbao, Qi; Ming, Liao
EPI1093286	HA	China	2016-Mar-21	EPI_ISL_283968	A/Chicken/Yunnan/YN-11/2016 (H5N6)	South China Agricultural University	South China Agricultural University
EPI1093294	HA	China	2016-Jun-21	EPI_ISL_283969	A/Chicken/Yunnan/YN-12/2016 (H5N6)	South China Agricultural University	South China Agricultural University	Jiahao, Zhang; Guangjie, Lao; Ronghua, Zhang; Hexing, Wang; Guanming, Su; Bo, Li; Wenbao, Qi; Ming, Liao
EPI1143205	HA	China	2016-May-15	EPI_ISL_291952	A/Bar-headed Goose/Qinghai/B44/2016		Wuhan Institute of Virology
EPI1144047	HA	China	2016-May-13	EPI_ISL_292170	A/Bar-headed Goose/Qinghai/A22/2016	Wuhan Institute of Virology, CAS	Wuhan Institute of Virology
EPI1144061	HA	China	2016-May-15	EPI_ISL_292172	A/Bar-headed Goose/Qinghai/B7/2016	Wuhan Institute of Virology, CAS	Wuhan Institute of Virology
EPI1144069	HA	China	2016-May-15	EPI_ISL_292173	A/Bar-headed Goose/Qinghai/B54/2016	Wuhan Institute of Virology, CAS	Wuhan Institute of Virology
EPI1144077	HA	China	2016-May-14	EPI_ISL_292174	A/Bar-headed Goose/Qinghai/XX431/2016	Wuhan Institute of Virology, CAS	Wuhan Institute of Virology
EPI1144085	HA	China	2016-May-14	EPI_ISL_292175	A/Bar-headed Goose/Qinghai/XX446/2016	Wuhan Institute of Virology, CAS	Wuhan Institute of Virology
EPI1144093	HA	China	2016-May-13	EPI_ISL_292176	A/Bar-headed Goose/Qinghai/A17/2016	Wuhan Institute of Virology, CAS	Wuhan Institute of Virology
EPI1144101	HA	China	2016-May-14	EPI_ISL_292177	A/Bar-headed Goose/Qinghai/A20/2016	Wuhan Institute of Virology, CAS	Wuhan Institute of Virology
EPI1144109	HA	China	2016-May-14	EPI_ISL_292178	A/Bar-headed Goose/Qinghai/A12/2016	Wuhan Institute of Virology, CAS	Wuhan Institute of Virology
EPI1144117	HA	China	2016-May-12	EPI_ISL_292179	A/Bar-headed Goose/Qinghai/XX13/2016	Wuhan Institute of Virology, CAS	Wuhan Institute of Virology
EPI1144125	HA	China	2016-May-12	EPI_ISL_292180	A/Bar-headed Goose/Qinghai/XX22/2016	Wuhan Institute of Virology, CAS	Wuhan Institute of Virology
EPI1144133	HA	China	2016-May-14	EPI_ISL_292181	A/Bar-headed Goose/Qinghai/A19/2016	Wuhan Institute of Virology, CAS	Wuhan Institute of Virology
EPI1144141	HA	China	2016-May-13	EPI_ISL_292182	A/Bar-headed Goose/Qinghai/A16/2016	Wuhan Institute of Virology, CAS	Wuhan Institute of Virology
EPI1144149	HA	China	2016-May-14	EPI_ISL_292183	A/Bar-headed Goose/Qinghai/A13/2016	Wuhan Institute of Virology, CAS	Wuhan Institute of Virology
EPI1144157	HA	China	2016-May-15	EPI_ISL_292184	A/Bar-headed Goose/Qinghai/B51/2016	Wuhan Institute of Virology, CAS	Wuhan Institute of Virology
EPI1144165	HA	China	2016-Jul-13	EPI_ISL_292185	A/Great Cormorant/Qinghai/Y01/2016	Wuhan Institute of Virology, CAS	Wuhan Institute of Virology
EPI1144173	HA	China	2016-May-15	EPI_ISL_292186	A/Bar-headed Goose/Qinghai/B34/2016	Wuhan Institute of Virology, CAS	Wuhan Institute of Virology
EPI1144181	HA	China	2016-May-14	EPI_ISL_292187	A/Bar-headed Goose/Qinghai/XX782/2016	Wuhan Institute of Virology, CAS	Wuhan Institute of Virology
EPI1144189	HA	China	2016-Jul-13	EPI_ISL_292188	A/Great Cormorant/Qinghai/B82/2016	Wuhan Institute of Virology, CAS	Wuhan Institute of Virology
EPI1144198	HA	China	2016-May-14	EPI_ISL_292189	A/Bar-headed Goose/Qinghai/A21/2016	Wuhan Institute of Virology, CAS	Wuhan Institute of Virology
EPI1144206	HA	China	2016-May-12	EPI_ISL_292190	A/Bar-headed Goose/Qinghai/XX111/2016	Wuhan Institute of Virology, CAS	Wuhan Institute of Virology
EPI1144214	HA	China	2016-May-15	EPI_ISL_292191	A/Bar-headed Goose/Qinghai/B12/2016	Wuhan Institute of Virology, CAS	Wuhan Institute of Virology
EPI1144222	HA	China	2016-May-13	EPI_ISL_292192	A/Bar-headed Goose/Qinghai/A23/2016	Wuhan Institute of Virology, CAS	Wuhan Institute of Virology
EPI1144230	HA	China	2016-May-12	EPI_ISL_292193	A/Bar-headed Goose/Qinghai/XX76/2016	Wuhan Institute of Virology, CAS	Wuhan Institute of Virology
EPI1145830	HA	China	2016-May-12	EPI_ISL_292194	A/Bar-headed Goose/Qinghai/a88/2016	Wuhan Institute of Virology, CAS	Wuhan Institute of Virology
EPI1144246	HA	China	2016-May-12	EPI_ISL_292196	A/Bar-headed Goose/Qinghai/a32/2016	Wuhan Institute of Virology, CAS	Wuhan Institute of Virology
EPI1144254	HA	China	2016-May-14	EPI_ISL_292198	A/Bar-headed Goose/Qinghai/a115/2016	Wuhan Institute of Virology, CAS	Wuhan Institute of Virology
EPI1144361	HA	China	2016-May-14	EPI_ISL_292229	A/Bar-headed Goose/Qinghai/a113/2016	Wuhan Institute of Virology, CAS	Wuhan Institute of Virology
EPI1144369	HA	China	2016-May-15	EPI_ISL_292230	A/Bar-headed Goose/Qinghai/a93/2016	Wuhan Institute of Virology, CAS	Wuhan Institute of Virology
EPI1144377	HA	China	2016-May-15	EPI_ISL_292231	A/Bar-headed Goose/Qinghai/a61/2016	Wuhan Institute of Virology, CAS	Wuhan Institute of Virology
EPI1144385	HA	China	2016-Apr-21	EPI_ISL_292232	A/Bar-headed Goose/Qinghai/HDT001/2016	Wuhan Institute of Virology, CAS	Wuhan Institute of Virology
EPI1144393	HA	China	2016-May-15	EPI_ISL_292233	A/Bar-headed Goose/Qinghai/a91/2016	Wuhan Institute of Virology, CAS	Wuhan Institute of Virology
EPI1144401	HA	China	2016-May-15	EPI_ISL_292234	A/Bar-headed Goose/Qinghai/a92/2016	Wuhan Institute of Virology, CAS	Wuhan Institute of Virology
EPI1144409	HA	China	2016-May-13	EPI_ISL_292235	A/Bar-headed Goose/Qinghai/a43/2016	Wuhan Institute of Virology, CAS	Wuhan Institute of Virology
EPI1144417	HA	China	2016-May-13	EPI_ISL_292236	A/Bar-headed Goose/Qinghai/a24/2016	Wuhan Institute of Virology, CAS	Wuhan Institute of Virology
EPI1144425	HA	China	2016-May-12	EPI_ISL_292237	A/Bar-headed Goose/Qinghai/a15/2016	Wuhan Institute of Virology, CAS	Wuhan Institute of Virology
EPI1144433	HA	China	2016-May-15	EPI_ISL_292238	A/Bar-headed Goose/Qinghai/p18/2016	Wuhan Institute of Virology, CAS	Wuhan Institute of Virology
EPI1144441	HA	China	2016-May-13	EPI_ISL_292239	A/Bar-headed Goose/Qinghai/p9/2016	Wuhan Institute of Virology, CAS	Wuhan Institute of Virology
EPI1144449	HA	China	2016-May-15	EPI_ISL_292240	A/Bar-headed Goose/Qinghai/p23/2016	Wuhan Institute of Virology, CAS	Wuhan Institute of Virology
EPI1145050	HA	China	2016-Jul-13	EPI_ISL_292326	A/Great Cormorant/Qinghai/a51/2016	Wuhan Institute of Virology, CAS	Wuhan Institute of Virology
EPI1145059	HA	China	2016-May-13	EPI_ISL_292327	A/Bar-headed Goose/Qinghai/p2/2016	Wuhan Institute of Virology, CAS	Wuhan Institute of Virology
EPI1145067	HA	China	2016-May-13	EPI_ISL_292328	A/Bar-headed Goose/Qinghai/a45/2016	Wuhan Institute of Virology, CAS	Wuhan Institute of Virology
EPI1145076	HA	China	2016-May-12	EPI_ISL_292329	A/Bar-headed Goose/Qinghai/a27/2016	Wuhan Institute of Virology, CAS	Wuhan Institute of Virology
EPI1145084	HA	China	2016-May-13	EPI_ISL_292330	A/Bar-headed Goose/Qinghai/a26/2016	Wuhan Institute of Virology, CAS	Wuhan Institute of Virology
EPI1145092	HA	China	2016-May-13	EPI_ISL_292331	A/Bar-headed Goose/Qinghai/a114/2016	Wuhan Institute of Virology, CAS	Wuhan Institute of Virology
EPI1145846	HA	China	2016-May-15	EPI_ISL_292495	A/Bar-headed Goose/Qinghai/B11/2016	Wuhan Institute of Virology, CAS	Wuhan Institute of Virology
EPI1145853	HA	China	2016-May-14	EPI_ISL_292496	A/Bar-headed Goose/Qinghai/A11/2016	Wuhan Institute of Virology, CAS	Wuhan Institute of Virology
EPI1149961	HA	China	2016-May-15	EPI_ISL_292497	A/Bar-headed Goose/Qinghai/XXI122/2016	Wuhan Institute of Virology, CAS	Wuhan Institute of Virology
EPI1159809	HA	China	2016-Dec-13	EPI_ISL_295492	A/Anser cygnoides/Hubei/FW44/2016		Import from public-domain	Ma,L.; Zhao,L.; Wang,R.; Chen,Q.
EPI1159817	HA	China	2016-Dec-28	EPI_ISL_295493	A/Cygnus atratus/Hubei/2Z2-O/2016		Import from public-domain	Ma,L.; Zhao,L.; Wang,R.; Chen,Q.
EPI1159825	HA	China	2016-Dec-20	EPI_ISL_295494	A/Cygnus atratus/Hubei/HF-1/2016		Import from public-domain	Ma,L.; Zhao,L.; Wang,R.; Chen,Q.
EPI1159833	HA	China	2016-Dec-28	EPI_ISL_295495	A/Duck/Dongting/D76-1/2016		Import from public-domain	Ma,L.; Wang,R.; Zhang,X.; Chen,Q.
EPI1159841	HA	China	2015-Nov-11	EPI_ISL_295496	A/Commom Teal/Ningxia/474-9/2015		Import from public-domain	Lu,S.; Zhao,Z.; Zhang,J.; Wang,W.; He,X.; Yu,M.; Zhang,C.; Li,X.; Guo,Z.; Yang,X.; Liu,L.; Zhi,M.; Fu,T.; Lv,X.; Ma,W.; Liao,M.; Chai,H.; Qian,J.; Ma,J.; Jin,H.; Hua,Y.
EPI1159849	HA	China	2015-Nov-11	EPI_ISL_295497	A/Shoveller/Ningxia/475-11/2015		Import from public-domain	Lu,S.; Zhao,Z.; Zhang,J.; Wang,W.; He,X.; Yu,M.; Zhang,C.; Li,X.; Guo,Z.; Yang,X.; Liu,L.; Zhi,M.; Fu,T.; Lv,X.; Ma,W.; Liao,M.; Chai,H.; Qian,J.; Ma,J.; Jin,H.; Hua,Y.
EPI1159857	HA	China	2015-Nov-11	EPI_ISL_295498	A/Wigeon/Ningxia/476-12/2015		Import from public-domain	Lu,S.; Zhao,Z.; Zhang,J.; Wang,W.; He,X.; Yu,M.; Zhang,C.; Li,X.; Guo,Z.; Yang,X.; Liu,L.; Zhi,M.; Fu,T.; Lv,X.; Ma,W.; Liao,M.; Chai,H.; Qian,J.; Ma,J.; Jin,H.; Hua,Y.
EPI1159865	HA	China	2015-Nov-11	EPI_ISL_295499	A/Commom Teal/Ningxia/478-15/2015		Import from public-domain	Lu,S.; Zhao,Z.; Zhang,J.; Wang,W.; He,X.; Yu,M.; Zhang,C.; Li,X.; Guo,Z.; Yang,X.; Liu,L.; Zhi,M.; Fu,T.; Lv,X.; Ma,W.; Liao,M.; Chai,H.; Qian,J.; Ma,J.; Jin,H.; Hua,Y.
EPI1159873	HA	China	2015-Nov-11	EPI_ISL_295500	A/Shoveller/Ningxia/481-21/2015		Import from public-domain	Lu,S.; Zhao,Z.; Zhang,J.; Wang,W.; He,X.; Yu,M.; Zhang,C.; Li,X.; Guo,Z.; Yang,X.; Liu,L.; Zhi,M.; Fu,T.; Lv,X.; Ma,W.; Liao,M.; Chai,H.; Qian,J.; Ma,J.; Jin,H.; Hua,Y.
EPI1159881	HA	China	2015-Nov-11	EPI_ISL_295501	A/Great Crested Grebe/Ningxia/482-26/2015		Import from public-domain	Lu,S.; Zhao,Z.; Zhang,J.; Wang,W.; He,X.; Yu,M.; Zhang,C.; Li,X.; Guo,Z.; Yang,X.; Liu,L.; Zhi,M.; Fu,T.; Lv,X.; Ma,W.; Liao,M.; Chai,H.; Qian,J.; Ma,J.; Jin,H.; Hua,Y.
EPI1159893	HA	China	2015-Nov-11	EPI_ISL_295502	A/Shoveller/Ningxia/483-28/2015		Import from public-domain	Lu,S.; Zhao,Z.; Zhang,J.; Wang,W.; He,X.; Yu,M.; Zhang,C.; Li,X.; Guo,Z.; Yang,X.; Liu,L.; Zhi,M.; Fu,T.; Lv,X.; Ma,W.; Liao,M.; Chai,H.; Qian,J.; Ma,J.; Jin,H.; Hua,Y.
EPI1159899	HA	China	2015-Nov-11	EPI_ISL_295503	A/Gadwall/Ningxia/472-7/2015		Import from public-domain	Lu,S.; Zhao,Z.; Zhang,J.; Wang,W.; He,X.; Yu,M.; Zhang,C.; Li,X.; Guo,Z.; Yang,X.; Liu,L.; Zhi,M.; Fu,T.; Lv,X.; Ma,W.; Liao,M.; Chai,H.; Qian,J.; Ma,J.; Jin,H.; Hua,Y.
EPI1159905	HA	China	2015-Nov-11	EPI_ISL_295504	A/Falcated Duck/Ningxia/484-29/2015		Import from public-domain	Lu,S.; Zhao,Z.; Zhang,J.; Wang,W.; He,X.; Yu,M.; Zhang,C.; Li,X.; Guo,Z.; Yang,X.; Liu,L.; Zhi,M.; Fu,T.; Lv,X.; Ma,W.; Liao,M.; Chai,H.; Qian,J.; Ma,J.; Jin,H.; Hua,Y.
EPI1159939	HA	China	2015-Nov-11	EPI_ISL_295505	A/Gadwall/Ningxia/485-31/2015		Import from public-domain	Lu,S.; Zhao,Z.; Zhang,J.; Wang,W.; He,X.; Yu,M.; Zhang,C.; Li,X.; Guo,Z.; Yang,X.; Liu,L.; Zhi,M.; Fu,T.; Lv,X.; Ma,W.; Liao,M.; Chai,H.; Qian,J.; Ma,J.; Jin,H.; Hua,Y.
EPI1159950	HA	China	2015-Nov-11	EPI_ISL_295519	A/Ruddy Shelduck/Ningxia/486-33/2015		Import from public-domain	Lu,S.; Zhao,Z.; Zhang,J.; Wang,W.; He,X.; Yu,M.; Zhang,C.; Li,X.; Guo,Z.; Yang,X.; Liu,L.; Zhi,M.; Fu,T.; Lv,X.; Ma,W.; Liao,M.; Chai,H.; Qian,J.; Ma,J.; Jin,H.; Hua,Y.
EPI1159957	HA	China	2015-Nov-11	EPI_ISL_295520	A/Gadwall/Ningxia/487-38/2015		Import from public-domain	Lu,S.; Zhao,Z.; Zhang,J.; Wang,W.; He,X.; Yu,M.; Zhang,C.; Li,X.; Guo,Z.; Yang,X.; Liu,L.; Zhi,M.; Fu,T.; Lv,X.; Ma,W.; Liao,M.; Chai,H.; Qian,J.; Ma,J.; Jin,H.; Hua,Y.
EPI1159963	HA	China	2015-Nov-16	EPI_ISL_295521	A/Shoveller/Ningxia/488-53/2015		Import from public-domain	Lu,S.; Zhao,Z.; Zhang,J.; Wang,W.; He,X.; Yu,M.; Zhang,C.; Li,X.; Guo,Z.; Yang,X.; Liu,L.; Zhi,M.; Fu,T.; Lv,X.; Ma,W.; Liao,M.; Chai,H.; Qian,J.; Ma,J.; Jin,H.; Hua,Y.
EPI1161000	HA	Japan	2016-Nov-29	EPI_ISL_295701	A/whooper swan/Ibaraki/28-309/2016		Import from public-domain	Soda,K.; Usui,T.; Ito,H.; Ozaki,H.; Yamaguchi,T.; Ito,T.
EPI1161008	HA	Japan	2016-Dec-05	EPI_ISL_295702	A/black-headed gull/Ibaraki/0803-194/2016		Import from public-domain	Soda,K.; Usui,T.; Ito,H.; Ozaki,H.; Yamaguchi,T.; Ito,T.
EPI1161016	HA	Japan	2016-Dec-08	EPI_ISL_295703	A/mute swan/Ibaraki/0803-201/2016		Import from public-domain	Soda,K.; Usui,T.; Ito,H.; Ozaki,H.; Yamaguchi,T.; Ito,T.
EPI1161024	HA	Japan	2016-Dec-10	EPI_ISL_295704	A/mute swan/Ibaraki/0803-208/2016		Import from public-domain	Soda,K.; Usui,T.; Ito,H.; Ozaki,H.; Yamaguchi,T.; Ito,T.
EPI1161032	HA	Japan	2016-Dec-13	EPI_ISL_295705	A/mute swan/Ibaraki/0803-214/2016		Import from public-domain	Soda,K.; Usui,T.; Ito,H.; Ozaki,H.; Yamaguchi,T.; Ito,T.
EPI1161141	HA	Japan	2017-Jan-06	EPI_ISL_295751	A/greater scaup/Aichi/2301N021/2017		Import from public-domain	Soda,K.; Usui,T.; Ito,H.; Ozaki,H.; Yamaguchi,T.; Ito,T.
EPI1161234	HA	Japan	2016-Dec-17	EPI_ISL_295754	A/cackling goose/Aichi/2312T020/2016		Import from public-domain	Soda,K.; Usui,T.; Ito,H.; Ozaki,H.; Yamaguchi,T.; Ito,T.
EPI1161356	HA	Vietnam	2016-Aug-15	EPI_ISL_295813	A/duck/Vietnam/HU5-1571/2016		Import from public-domain	Chu,D.H.; Nguyen,L.T.; Okamatsu,M.; Matsuno,K.; Sakoda,Y.; Jizou,M.
EPI1161364	HA	Vietnam	2016-Aug-15	EPI_ISL_295814	A/duck/Vietnam/HU5-1572/2016		Import from public-domain	Chu,D.H.; Nguyen,L.T.; Okamatsu,M.; Matsuno,K.; Sakoda,Y.; Jizou,M.
EPI1161374	HA	Vietnam	2016-Aug-15	EPI_ISL_295815	A/duck/Vietnam/HU5-1573/2016		Import from public-domain	Chu,D.H.; Nguyen,L.T.; Okamatsu,M.; Matsuno,K.; Sakoda,Y.; Jizou,M.
EPI1161381	HA	Vietnam	2016-Aug-15	EPI_ISL_295816	A/duck/Vietnam/HU5-1574/2016		Import from public-domain	Chu,D.H.; Nguyen,L.T.; Okamatsu,M.; Matsuno,K.; Sakoda,Y.; Jizou,M.
EPI1161420	HA	Vietnam	2016-Aug-15	EPI_ISL_295821	A/duck/Vietnam/HU5-1575/2016		Import from public-domain	Nguyen; LT.; Chu; DH.; Matsuno,K.; Okamatsu,M.; Sakoda,Y.; Jizou,M.
EPI1184338	HA	Japan	2016-Nov-27	EPI_ISL_300660	A/tundra swan/Niigata/1511C003/2016		Import from public-domain	Soda,K.; Usui,T.; Ito,H.; Ozaki,H.; Yamaguchi,T.; Ito,T.
EPI1184346	HA	Japan	2016-Dec-02	EPI_ISL_300661	A/tundra swan/Niigata/5112004/2016		Import from public-domain	Soda,K.; Usui,T.; Ito,H.; Ozaki,H.; Yamaguchi,T.; Ito,T.
EPI1184354	HA	Japan	2016-Dec-04	EPI_ISL_300662	A/tundra swan/Niigata/5112006/2016		Import from public-domain	Soda,K.; Usui,T.; Ito,H.; Ozaki,H.; Yamaguchi,T.; Ito,T.
EPI1184362	HA	Japan	2016-Dec-06	EPI_ISL_300663	A/tundra swan/Niigata/5112007/2016		Import from public-domain	Soda,K.; Usui,T.; Ito,H.; Ozaki,H.; Yamaguchi,T.; Ito,T.
EPI1198832	HA	Vietnam	2017-Jan-16	EPI_ISL_303274	A/chicken/Nghe An/AI461/2017	National Institute of Animal Health	National Institute of Animal Health	Uchida,Y
EPI1198840	HA	Vietnam	2016-Aug-08	EPI_ISL_303275	A/duck/Nghe An/AI466/2016	National Institute of Animal Health	National Institute of Animal Health	Uchida,Y
EPI1198872	HA	Vietnam	2016-Oct-10	EPI_ISL_303279	A/duck/Nghe An/AI464/2016	National Institute of Animal Health	National Institute of Animal Health	Uchida,Y
EPI1198912	HA	Vietnam	2016-Aug-10	EPI_ISL_303284	A/mallardduck/Nghe An/AI467/2016	National Institute of Animal Health	National Institute of Animal Health	Uchida,Y
EPI1198936	HA	Vietnam	2016-Aug-04	EPI_ISL_303287	A/muscovyduck/Nghe An/AI465/2016	National Institute of Animal Health	National Institute of Animal Health	Uchida,Y
EPI1272962	HA	Cambodia	2016-Mar-01	EPI_ISL_321100	A/chicken/Cambodia/a17W9M1/2016	Institut Pasteur du Cambodia	Institut Pasteur du Cambodia
EPI1272982	HA	Cambodia	2016-Mar-02	EPI_ISL_321106	A/chicken/Cambodia/a27W9M1/2016		Institut Pasteur du Cambodia
EPI1272990	HA	Cambodia	2016-Mar-02	EPI_ISL_321107	A/duck/Cambodia/a23W9M1/2016		Institut Pasteur du Cambodia
EPI1272998	HA	Cambodia	2016-Mar-02	EPI_ISL_321108	A/duck/Cambodia/a24W9M1/2016		Institut Pasteur du Cambodia
EPI1273006	HA	Cambodia	2015-Feb-09	EPI_ISL_321109	A/chicken/Cambodia/Z8W7M1/2015		Institut Pasteur du Cambodia
EPI1273014	HA	Cambodia	2015-Feb-09	EPI_ISL_321110	A/chicken/Cambodia/Z9W7M1/2015		Institut Pasteur du Cambodia
EPI1273022	HA	Cambodia	2015-Feb-10	EPI_ISL_321111	A/duck/Cambodia/Z13W7M3/2015		Institut Pasteur du Cambodia
EPI1273030	HA	Cambodia	2015-Feb-17	EPI_ISL_321112	A/duck/Cambodia/Z35W8M3/2015		Institut Pasteur du Cambodia
EPI1273038	HA	Cambodia	2015-Feb-17	EPI_ISL_321113	A/chicken/Cambodia/Z37W8M3/2015		Institut Pasteur du Cambodia
EPI1273046	HA	Cambodia	2015-Feb-23	EPI_ISL_321114	A/duck/Cambodia/Z44W9M1/2015		Institut Pasteur du Cambodia
EPI1273054	HA	Cambodia	2015-Feb-23	EPI_ISL_321115	A/duck/Cambodia/Z45W9M1/2015		Institut Pasteur du Cambodia
EPI1273062	HA	Cambodia	2015-Feb-23	EPI_ISL_321116	A/chicken/Cambodia/Z49W9M1/2015		Institut Pasteur du Cambodia
EPI1273070	HA	Cambodia	2015-Feb-23	EPI_ISL_321117	A/chicken/Cambodia/Z50W9M1/2015		Institut Pasteur du Cambodia
EPI1273078	HA	Cambodia	2015-Feb-24	EPI_ISL_321118	A/chicken/Cambodia/Z57W9M3/2015		Institut Pasteur du Cambodia
EPI1273086	HA	Cambodia	2015-Feb-24	EPI_ISL_321119	A/chicken/Cambodia/Z59W9M3/2015		Institut Pasteur du Cambodia
EPI1273094	HA	Cambodia	2015-Feb-24	EPI_ISL_321120	A/chicken/Cambodia/Z60W9M3/2015		Institut Pasteur du Cambodia
EPI1273102	HA	Cambodia	2015-Mar-02	EPI_ISL_321121	A/chicken/Cambodia/Z70W10M1/2015		Institut Pasteur du Cambodia
EPI1273110	HA	Cambodia	2015-Mar-09	EPI_ISL_321122	A/duck/Cambodia/Z86W11M1/2015		Institut Pasteur du Cambodia
EPI1273118	HA	Cambodia	2015-Mar-09	EPI_ISL_321123	A/chicken/Cambodia/Z89W11M1/2015		Institut Pasteur du Cambodia
EPI1273126	HA	Cambodia	2015-Mar-30	EPI_ISL_321124	A/duck/Cambodia/Z143W14M1/2015		Institut Pasteur du Cambodia
EPI1273134	HA	Cambodia	2015-Mar-30	EPI_ISL_321125	A/duck/Cambodia/Z146W14M1/2015		Institut Pasteur du Cambodia
EPI1273142	HA	Cambodia	2015-Mar-30	EPI_ISL_321126	A/chicken/Cambodia/Z148W14M1/2015		Institut Pasteur du Cambodia
EPI1273150	HA	Cambodia	2015-Mar-30	EPI_ISL_321127	A/chicken/Cambodia/Z149W14M1/2015		Institut Pasteur du Cambodia
EPI1273158	HA	Cambodia	2015-Apr-20	EPI_ISL_321128	A/duck/Cambodia/Z205W17M1/2015		Institut Pasteur du Cambodia
EPI1273166	HA	Cambodia	2015-Apr-20	EPI_ISL_321129	A/duck/Cambodia/Z206W17M1/2015		Institut Pasteur du Cambodia
EPI1273174	HA	Cambodia	2015-Apr-28	EPI_ISL_321130	A/duck/Cambodia/Z223W18M1/2015		Institut Pasteur du Cambodia
EPI1273182	HA	Cambodia	2015-May-11	EPI_ISL_321131	A/duck/Cambodia/Z266W20M1/2015		Institut Pasteur du Cambodia
EPI1273190	HA	Cambodia	2015-May-11	EPI_ISL_321132	A/chicken/Cambodia/Z267W20M1/2015		Institut Pasteur du Cambodia
EPI1273198	HA	Cambodia	2015-May-11	EPI_ISL_321133	A/chicken/Cambodia/Z268W20M1/2015		Institut Pasteur du Cambodia
EPI1273206	HA	Cambodia	2015-Jul-31	EPI_ISL_321134	A/duck/Cambodia/Z484W31M1/2015		Institut Pasteur du Cambodia
EPI1273214	HA	Cambodia	2015-Nov-02	EPI_ISL_321135	A/duck/Cambodia/Z765W45M1/2015		Institut Pasteur du Cambodia
EPI1273222	HA	Cambodia	2015-Nov-09	EPI_ISL_321136	A/duck/Cambodia/Z793W46M3/2015		Institut Pasteur du Cambodia
EPI1273230	HA	Cambodia	2015-Nov-09	EPI_ISL_321137	A/duck/Cambodia/Z795W46M3/2015		Institut Pasteur du Cambodia
EPI1273238	HA	Cambodia	2015-Nov-09	EPI_ISL_321138	A/chicken/Cambodia/Z799W46M3/2015		Institut Pasteur du Cambodia
EPI1273246	HA	Cambodia	2015-Nov-09	EPI_ISL_321139	A/chicken/Cambodia/Z800W46M3/2015		Institut Pasteur du Cambodia
EPI1273254	HA	Cambodia	2015-Dec-21	EPI_ISL_321140	A/chicken/Cambodia/Z907W52M1/2015		Institut Pasteur du Cambodia
EPI1273262	HA	Cambodia	2015-Dec-28	EPI_ISL_321141	A/duck/Cambodia/Z926W53M1/2015		Institut Pasteur du Cambodia
EPI1273270	HA	Cambodia	2015-Dec-29	EPI_ISL_321142	A/duck/Cambodia/Z934W53M3/2015		Institut Pasteur du Cambodia
EPI1322960	HA	Bangladesh	2016-Nov-14	EPI_ISL_331846	A/duck/Bangladesh/AR132-18 D1/2016	Bangladesh Agricultural University, Faculty of Veterinary Science, Department of Pathology	Friedrich-Loeffler-Institut	Parvin, Rokshana; Harder, Timm
EPI1322962	HA	Bangladesh	2016-Nov-16	EPI_ISL_331847	A/chicken/Bangladesh/AR134-18 C1/2016	Bangladesh Agricultural University, Faculty of Veterinary Science, Department of Pathology	Friedrich-Loeffler-Institut	Parvin, Rokshana; Harder, Timm
EPI1324887	HA	Indonesia	2016-Jan-27	EPI_ISL_332149	A/duck/East_Java/Spg14/2016	Institute of Tropical Disease, Universitas Airlangga	Kobe University Graduate School of Medicine	K,Rahardjo;AN,Novianti;RR,Prasetya;AM,Nastri;JR,Dewantari;AP,Rahardjo;ATS,Estoepangestie;YK,Shimizu;ED,Poetranto;G,Soegiarto;Y,Mori;K,Shimizu
EPI1330375	HA	Bangladesh	2016-Dec-21	EPI_ISL_333110	A/goose/Bangladesh/19D760/2016	icddr,b International Centre for Diarrhoeal Disease Research, Bangladesh	Centers for Disease Control and Prevention	Yang, G.; Chowdury, S; Hodges, E; Rahman, M.Z.; Jang, Y.; Hossain, M.E.; Jones, J.; Stark, T.; Di, H.; Cook, P.W.; Ghosh, S.; Azziz-Baumgartner, E.; Barnes, J.; Wentworth, D.; Kennedy, E.; Davis, C.T.
EPI1330380	HA	Bangladesh	2016-Dec-21	EPI_ISL_333111	A/goose/Bangladesh/19D745/2016	icddr,b International Centre for Diarrhoeal Disease Research, Bangladesh	Centers for Disease Control and Prevention	Yang, G.; Chowdury, S; Hodges, E; Rahman, M.Z.; Jang, Y.; Hossain, M.E.; Jones, J.; Stark, T.; Di, H.; Cook, P.W.; Ghosh, S.; Azziz-Baumgartner, E.; Barnes, J.; Wentworth, D.; Kennedy, E.; Davis, C.T.
EPI1330393	HA	Bangladesh	2016-Dec-21	EPI_ISL_333113	A/goose/Bangladesh/19D744/2016	icddr,b International Centre for Diarrhoeal Disease Research, Bangladesh	Centers for Disease Control and Prevention	Yang, G.; Chowdury, S; Hodges, E; Rahman, M.Z.; Jang, Y.; Hossain, M.E.; Jones, J.; Stark, T.; Di, H.; Cook, P.W.; Ghosh, S.; Azziz-Baumgartner, E.; Barnes, J.; Wentworth, D.; Kennedy, E.; Davis, C.T.
EPI1330412	HA	Bangladesh	2016-Jul-19	EPI_ISL_333116	A/avian/Bangladesh/PV711/2016	icddr,b International Centre for Diarrhoeal Disease Research, Bangladesh	Centers for Disease Control and Prevention	Yang, G.; Chowdury, S; Hodges, E; Rahman, M.Z.; Jang, Y.; Hossain, M.E.; Jones, J.; Stark, T.; Di, H.; Cook, P.W.; Ghosh, S.; Azziz-Baumgartner, E.; Barnes, J.; Wentworth, D.; Kennedy, E.; Davis, C.T.
EPI1330420	HA	Bangladesh	2016-Jun-16	EPI_ISL_333117	A/duck/Bangladesh/17D629/2016	icddr,b International Centre for Diarrhoeal Disease Research, Bangladesh	Centers for Disease Control and Prevention	Yang, G.; Chowdury, S; Hodges, E; Rahman, M.Z.; Jang, Y.; Hossain, M.E.; Jones, J.; Stark, T.; Di, H.; Cook, P.W.; Ghosh, S.; Azziz-Baumgartner, E.; Barnes, J.; Wentworth, D.; Kennedy, E.; Davis, C.T.
EPI1330444	HA	Bangladesh	2016-Jul-01	EPI_ISL_333120	A/avian/Bangladesh/PV157/2016	icddr,b International Centre for Diarrhoeal Disease Research, Bangladesh	Centers for Disease Control and Prevention	Yang, G.; Chowdury, S; Hodges, E; Rahman, M.Z.; Jang, Y.; Hossain, M.E.; Jones, J.; Stark, T.; Di, H.; Cook, P.W.; Ghosh, S.; Azziz-Baumgartner, E.; Barnes, J.; Wentworth, D.; Kennedy, E.; Davis, C.T.
EPI1330452	HA	Bangladesh	2016-Jul-01	EPI_ISL_333121	A/avian/Bangladesh/PV154/2016	icddr,b International Centre for Diarrhoeal Disease Research, Bangladesh	Centers for Disease Control and Prevention	Yang, G.; Chowdury, S; Hodges, E; Rahman, M.Z.; Jang, Y.; Hossain, M.E.; Jones, J.; Stark, T.; Di, H.; Cook, P.W.; Ghosh, S.; Azziz-Baumgartner, E.; Barnes, J.; Wentworth, D.; Kennedy, E.; Davis, C.T.
EPI1330483	HA	Bangladesh	2016-Nov-13	EPI_ISL_333125	A/duck/Bangladesh/17D727/2016	icddr,b International Centre for Diarrhoeal Disease Research, Bangladesh	Centers for Disease Control and Prevention	Yang, G.; Chowdury, S; Hodges, E; Rahman, M.Z.; Jang, Y.; Hossain, M.E.; Jones, J.; Stark, T.; Di, H.; Cook, P.W.; Ghosh, S.; Azziz-Baumgartner, E.; Barnes, J.; Wentworth, D.; Kennedy, E.; Davis, C.T.
EPI1330490	HA	Bangladesh	2016-Jul-03	EPI_ISL_333126	A/duck/Bangladesh/17D644/2016	icddr,b International Centre for Diarrhoeal Disease Research, Bangladesh	Centers for Disease Control and Prevention	Yang, G.; Chowdury, S; Hodges, E; Rahman, M.Z.; Jang, Y.; Hossain, M.E.; Jones, J.; Stark, T.; Di, H.; Cook, P.W.; Ghosh, S.; Azziz-Baumgartner, E.; Barnes, J.; Wentworth, D.; Kennedy, E.; Davis, C.T.
EPI1330497	HA	Bangladesh	2016-Jul-03	EPI_ISL_333127	A/duck/Bangladesh/17D642/2016	icddr,b International Centre for Diarrhoeal Disease Research, Bangladesh	Centers for Disease Control and Prevention	Yang, G.; Chowdury, S; Hodges, E; Rahman, M.Z.; Jang, Y.; Hossain, M.E.; Jones, J.; Stark, T.; Di, H.; Cook, P.W.; Ghosh, S.; Azziz-Baumgartner, E.; Barnes, J.; Wentworth, D.; Kennedy, E.; Davis, C.T.
EPI1330543	HA	Bangladesh	2017-Jan-11	EPI_ISL_333133	A/duck/Bangladesh/19D770/2017	icddr,b International Centre for Diarrhoeal Disease Research, Bangladesh	Centers for Disease Control and Prevention	Yang, G.; Chowdury, S; Hodges, E; Rahman, M.Z.; Jang, Y.; Hossain, M.E.; Jones, J.; Stark, T.; Di, H.; Cook, P.W.; Ghosh, S.; Azziz-Baumgartner, E.; Barnes, J.; Wentworth, D.; Kennedy, E.; Davis, C.T.
EPI1330548	HA	Bangladesh	2017-Jan-11	EPI_ISL_333134	A/goose/Bangladesh/19D764/2017	icddr,b International Centre for Diarrhoeal Disease Research, Bangladesh	Centers for Disease Control and Prevention	Yang, G.; Chowdury, S; Hodges, E; Rahman, M.Z.; Jang, Y.; Hossain, M.E.; Jones, J.; Stark, T.; Di, H.; Cook, P.W.; Ghosh, S.; Azziz-Baumgartner, E.; Barnes, J.; Wentworth, D.; Kennedy, E.; Davis, C.T.
EPI1331410	HA	Bangladesh	2016-Sep-05	EPI_ISL_333251	A/chicken/Bangladesh/08C176/2016	icddr,b International Centre for Diarrhoeal Disease Research, Bangladesh	Centers for Disease Control and Prevention	Yang, G.; Chowdury, S; Hodges, E; Rahman, M.Z.; Jang, Y.; Hossain, M.E.; Jones, J.; Stark, T.; Di, H.; Cook, P.W.; Ghosh, S.; Azziz-Baumgartner, E.; Barnes, J.; Wentworth, D.; Kennedy, E.; Davis, C.T.
EPI1331417	HA	Bangladesh	2016-Sep-05	EPI_ISL_333252	A/chicken/Bangladesh/08C178/2016	icddr,b International Centre for Diarrhoeal Disease Research, Bangladesh	Centers for Disease Control and Prevention	Yang, G.; Chowdury, S; Hodges, E; Rahman, M.Z.; Jang, Y.; Hossain, M.E.; Jones, J.; Stark, T.; Di, H.; Cook, P.W.; Ghosh, S.; Azziz-Baumgartner, E.; Barnes, J.; Wentworth, D.; Kennedy, E.; Davis, C.T.
EPI1353742	HA	Lao, People's Democratic Republic	2015-Dec-24	EPI_ISL_337520	A/chicken/Laos/NL-1500466/2015		Animal and Plant Quarantine Agency (S-2158)
EPI1353750	HA	Lao, People's Democratic Republic	2016-Oct-13	EPI_ISL_337521	A/chicken/Laos/NL-1500548/2016		Animal and Plant Quarantine Agency (S-2158)
EPI1493342	HA	Vietnam	2015-Nov-10	EPI_ISL_365300	A/muscovy duck/Vietnam/LBM801c132/2015		Import from public-domain	Soda,K.; Nguyen,K.H.; Le,Q.M.; Ito,T.
EPI1510870	HA	Indonesia	2016-Jul-13	EPI_ISL_368672	A/duck/Indonesia/04161291-OR/2016		Import from public-domain	Lestari,L.; Wibawa,H.; Lubis,E.P.; Darmawan,R.; Rahayu,R.A.; Mulyawan,H.; Charoenkul,K.; Nasamran,C.; Poermadjaja,B.; Amonsin,A.
EPI1513778	HA	Korea, Republic of	2015-Dec-17	EPI_ISL_369297	A/broiler duck/Korea/H3422/2015	Animal and Plant Quarantine Agency (S-2145)	Animal and Plant Quarantine Agency (S-2158)
EPI1513802	HA	Korea, Republic of	2015-Nov-02	EPI_ISL_369300	A/spot-billed duck/Korea/H3135/2015	Animal and Plant Quarantine Agency (S-2145)	Animal and Plant Quarantine Agency (S-2158)
EPI1513810	HA	Korea, Republic of	2015-Oct-29	EPI_ISL_369301	A/white-fronted goose/Korea/H3173/2015	Animal and Plant Quarantine Agency (S-2145)	Animal and Plant Quarantine Agency (S-2158)
EPI1513818	HA	Korea, Republic of	2015-Nov-23	EPI_ISL_369302	A/white-fronted goose/Korea/H3334/2015	Animal and Plant Quarantine Agency (S-2145)	Animal and Plant Quarantine Agency (S-2158)
EPI1513826	HA	Korea, Republic of	2015-Dec-21	EPI_ISL_369303	A/pink-footed goose/Korea/H3473/2015	Animal and Plant Quarantine Agency (S-2145)	Animal and Plant Quarantine Agency (S-2158)
EPI1513834	HA	Korea, Republic of	2016-Nov-22	EPI_ISL_369304	A/mallard/Korea/H50-4/2016	Animal and Plant Quarantine Agency (S-2145)	Animal and Plant Quarantine Agency (S-2158)
EPI1513842	HA	Korea, Republic of	2016-Nov-29	EPI_ISL_369305	A/mallard/Korea/H95-4/2016	Animal and Plant Quarantine Agency (S-2145)	Animal and Plant Quarantine Agency (S-2158)
EPI1513850	HA	Korea, Republic of	2016-Nov-29	EPI_ISL_369306	A/white-fronted goose/Korea/H96-1/2016	Animal and Plant Quarantine Agency (S-2145)	Animal and Plant Quarantine Agency (S-2158)
EPI1513858	HA	Korea, Republic of	2016-Dec-01	EPI_ISL_369307	A/mallard/Korea/H125-4/2016	Animal and Plant Quarantine Agency (S-2145)	Animal and Plant Quarantine Agency (S-2158)
EPI1513874	HA	Korea, Republic of	2015-Nov-16	EPI_ISL_369309	A/bean goose/Korea/H3316/2015	Animal and Plant Quarantine Agency (S-2145)	Animal and Plant Quarantine Agency (S-2158)
EPI1513882	HA	Korea, Republic of	2016-Nov-04	EPI_ISL_369310	A/mandarin duck/Korea/A44-1-3/2016	Animal and Plant Quarantine Agency (S-2145)	Animal and Plant Quarantine Agency (S-2158)
EPI1513890	HA	Korea, Republic of	2016-Dec-14	EPI_ISL_369311	A/spot-billed duck/Korea/H422-7/2016	Animal and Plant Quarantine Agency (S-2145)	Animal and Plant Quarantine Agency (S-2158)
EPI1513898	HA	Korea, Republic of	2016-Dec-27	EPI_ISL_369312	A/spot-billed duck/Korea/H604-1/2016	Animal and Plant Quarantine Agency (S-2145)	Animal and Plant Quarantine Agency (S-2158)
EPI1513906	HA	Korea, Republic of	2017-Jan-16	EPI_ISL_369313	A/white-fronted goose/Korea/H886/2017	Animal and Plant Quarantine Agency (S-2145)	Animal and Plant Quarantine Agency (S-2158)
EPI1514058	HA	Korea, Republic of	2015-Dec-07	EPI_ISL_369332	A/bean goose/Korea/H3373/2015	Animal and Plant Quarantine Agency (S-2145)	Animal and Plant Quarantine Agency (S-2158)
EPI1528976	HA	China	2015-Apr-02	EPI_ISL_372786	A/duck/Jiangsu/S1665/2015		Import from public-domain	Li,X.; Cui,P.; Zeng,X.; Jiang,Y.; Li,Y.; Yang,J.; Pan,Y.; Gao,X.; Zhao,C.; Wang,J.; Wang,K.; Deng,G.; Guo,J.
EPI1528992	HA	China	2016-Mar-05	EPI_ISL_372791	A/goose/China/GS25-HA.seq/2016		Import from public-domain	Jiao,P.
EPI1529000	HA	China	2016-Mar-05	EPI_ISL_372799	A/goose/China/GS24-HA.seq/2016		Import from public-domain	Jiao,P.
EPI1529007	HA	China	2016-Apr-10	EPI_ISL_372806	A/goose/China/GS37-4.seq/2016		Import from public-domain	Jiao,P.
EPI1529016	HA	China	2016-Apr-16	EPI_ISL_372815	A/goose/China/GS42-4.seq/2016		Import from public-domain	Jiao,P.
EPI1529024	HA	China	2016-Apr-02	EPI_ISL_372823	A/goose/China/GS45-4.seq/2016		Import from public-domain	Jiao,P.
EPI1529032	HA	China	2016-May-10	EPI_ISL_372831	A/chicken/China/CK46-4.seq/2016		Import from public-domain	Jiao,P.
EPI1529040	HA	China	2016-Jun-17	EPI_ISL_372840	A/goose/China/GS74-4.seq/2016		Import from public-domain	Jiao,P.
EPI1529693	HA	Japan	2016-Dec-09	EPI_ISL_372962	A/mallard/Aichi/2312T010/2016		Import from public-domain	Soda,K.; Usui,T.; Ito,H.; Ozaki,H.; Murase,T.; Yamaguchi,T.; Ito,T.; Sumi,H.
EPI1529713	HA	Japan	2016-Dec-09	EPI_ISL_372965	A/mallard/Aichi/2312T011/2016		Import from public-domain	Soda,K.; Usui,T.; Ito,H.; Ozaki,H.; Murase,T.; Yamaguchi,T.; Ito,T.; Sumi,H.
EPI1529735	HA	Japan	2016-Dec-09	EPI_ISL_372968	A/wigeon/Aichi/2312T012/2016		Import from public-domain	Soda,K.; Usui,T.; Ito,H.; Ozaki,H.; Murase,T.; Yamaguchi,T.; Ito,T.; Sumi,H.
EPI1529759	HA	Japan	2016-Dec-13	EPI_ISL_372971	A/mallard/Aichi/2312T018/2016		Import from public-domain	Soda,K.; Usui,T.; Ito,H.; Ozaki,H.; Murase,T.; Yamaguchi,T.; Ito,T.; Sumi,H.
EPI1549207	HA	China	2016-Oct-01	EPI_ISL_378244	A/Streptopelia decaocto/China/4/2016		Import from public-domain	Zhang,T.
EPI1549239	HA	Vietnam	2015-Nov-10	EPI_ISL_378252	A/duck/Vietnam/LBM805c113/2015		Import from public-domain	Soda,K.; Nguyen,K.H.; Ung,H.T.; Le,Q.M.; Ito,T.
EPI1549247	HA	Vietnam	2017-Jan-07	EPI_ISL_378253	A/duck/Nha Trang/194/2017		Import from public-domain	Soda,K.; Nguyen,K.H.; Ung,H.T.; Le,Q.M.; Ito,T.
EPI1549841	HA	China	2016-Dec-20	EPI_ISL_378362	A/whooper swan/Shanxi/RC01/2016		Import from public-domain	Li,M.; Zhao,N.; Ma,J.; Feng,S.; Chang,H.; Luo,J.; He,H.
EPI1549849	HA	Japan	2016-Dec-09	EPI_ISL_378363	A/cackling goose/Aichi/2312T008/2016		Import from public-domain	Soda,K.; Usui,T.; Ito,H.; Ozaki,H.; Murase,T.; Yamaguchi,T.; Ito,T.; Sumi,H.
EPI1549857	HA	Japan	2016-Dec-13	EPI_ISL_378364	A/cackling goose/Aichi/2312T017/2016		Import from public-domain	Soda,K.; Usui,T.; Ito,H.; Ozaki,H.; Murase,T.; Yamaguchi,T.; Ito,T.; Sumi,H.
EPI1549865	HA	Japan	2016-Dec-14	EPI_ISL_378365	A/cackling goose/Aichi/2312T019/2016		Import from public-domain	Soda,K.; Usui,T.; Ito,H.; Ozaki,H.; Murase,T.; Yamaguchi,T.; Ito,T.; Sumi,H.
EPI1619678	HA	Japan	2016-Nov-18	EPI_ISL_397346	A/duck/Tottori/E9/2016		Import from public-domain	Soda,K.; Usui,T.; Ito,H.; Ozaki,H.; Murase,T.; Yamaguchi,T.; Ito,T.
EPI1619686	HA	Japan	2016-Nov-18	EPI_ISL_397347	A/duck/Tottori/E10/2016		Import from public-domain	Soda,K.; Usui,T.; Ito,H.; Ozaki,H.; Murase,T.; Yamaguchi,T.; Ito,T.
EPI1619694	HA	Japan	2016-Nov-18	EPI_ISL_397348	A/duck/Tottori/E13/2016		Import from public-domain	Soda,K.; Usui,T.; Ito,H.; Ozaki,H.; Murase,T.; Yamaguchi,T.; Ito,T.
EPI1672616	HA	Indonesia	2016-Mar-16	EPI_ISL_406974	A/chicken/WestJava/VSN597/2016	Vaksindo Satwa Nusantara	PT. Vaksindo Satwa Nusantara	Prajitno, TY; Herliana, I; Wulandari, F; Putra, RP
EPI1672617	HA	Indonesia	2016-Oct-20	EPI_ISL_406975	A/chicken/WestJava/VSN676/2016	Vaksindo Satwa Nusantara	PT. Vaksindo Satwa Nusantara	Prajitno, TY; Herliana, I; Wulandari, F; Putra, RP
EPI1672618	HA	Indonesia	2016-Nov-11	EPI_ISL_406976	A/chicken/WestJava/VSN679/2016	Vaksindo Satwa Nusantara	PT. Vaksindo Satwa Nusantara	Prajitno, TY; Herliana, I; Wulandari, F; Putra, RP
EPI1672619	HA	Indonesia	2016-Dec-15	EPI_ISL_406977	A/chicken/EastJava/VSN690/2016	Vaksindo Satwa Nusantara	PT. Vaksindo Satwa Nusantara	Prajitno, TY; Herliana, I; Wulandari, F; Putra, RP
EPI1780139	HA	Vietnam	2016-Jan-28	EPI_ISL_504004	A/chicken/Quang Tri/MT11/2016		Import from public-domain	Nguyen,T.N.; Nguyen,C.H.; Chu,H.H.; Le,T.H.
EPI1785175	HA	Lao, People's Democratic Republic	2016-Sep-27	EPI_ISL_504910	A/chicken/Luang Prabang Province/NL-1621312/2016		Import from public-domain	Wong,F.Y.; Phommachanh,P.; Chanthavisouk,C.; Kalpravidh,W.; Mileto,P.; Davies,K.R.; Stevens,V.; Khounsy,S.; Bounma,P.; Phonsavat,S.; Phiphakhavong,S.; Souriya,M.; Khambounheuang,B.; Chanphengxay,S.; Butler,J.; Shan,S.; Broz,I.; Morrissy,C.; Eagles,D.; Douangngeun,B.
EPI1785177	HA	Lao, People's Democratic Republic	2016-Sep-27	EPI_ISL_504911	A/chicken/Luang Prabang Province/NL-1621313/2016		Import from public-domain	Wong,F.Y.; Phommachanh,P.; Chanthavisouk,C.; Kalpravidh,W.; Mileto,P.; Davies,K.R.; Stevens,V.; Khounsy,S.; Bounma,P.; Phonsavat,S.; Phiphakhavong,S.; Souriya,M.; Khambounheuang,B.; Chanphengxay,S.; Butler,J.; Shan,S.; Broz,I.; Morrissy,C.; Eagles,D.; Douangngeun,B.
EPI1785179	HA	Lao, People's Democratic Republic	2016-Oct-08	EPI_ISL_504912	A/chicken/Luang Prabang Province/NL-1621314/2016		Import from public-domain	Wong,F.Y.; Phommachanh,P.; Chanthavisouk,C.; Kalpravidh,W.; Mileto,P.; Davies,K.R.; Stevens,V.; Khounsy,S.; Bounma,P.; Phonsavat,S.; Phiphakhavong,S.; Souriya,M.; Khambounheuang,B.; Chanphengxay,S.; Butler,J.; Shan,S.; Broz,I.; Morrissy,C.; Eagles,D.; Douangngeun,B.
EPI1785181	HA	Lao, People's Democratic Republic	2016-Oct-08	EPI_ISL_504913	A/chicken/Luang Prabang Province/NL-1621315/2016		Import from public-domain	Wong,F.Y.; Phommachanh,P.; Chanthavisouk,C.; Kalpravidh,W.; Mileto,P.; Davies,K.R.; Stevens,V.; Khounsy,S.; Bounma,P.; Phonsavat,S.; Phiphakhavong,S.; Souriya,M.; Khambounheuang,B.; Chanphengxay,S.; Butler,J.; Shan,S.; Broz,I.; Morrissy,C.; Eagles,D.; Douangngeun,B.
EPI1785183	HA	Lao, People's Democratic Republic	2016-Oct-08	EPI_ISL_504914	A/chicken/Luang Prabang Province/NL-1621316/2016		Import from public-domain	Wong,F.Y.; Phommachanh,P.; Chanthavisouk,C.; Kalpravidh,W.; Mileto,P.; Davies,K.R.; Stevens,V.; Khounsy,S.; Bounma,P.; Phonsavat,S.; Phiphakhavong,S.; Souriya,M.; Khambounheuang,B.; Chanphengxay,S.; Butler,J.; Shan,S.; Broz,I.; Morrissy,C.; Eagles,D.; Douangngeun,B.
EPI1785185	HA	Lao, People's Democratic Republic	2016-Oct-08	EPI_ISL_504915	A/chicken/Luang Prabang Province/NL-1621317/2016		Import from public-domain	Wong,F.Y.; Phommachanh,P.; Chanthavisouk,C.; Kalpravidh,W.; Mileto,P.; Davies,K.R.; Stevens,V.; Khounsy,S.; Bounma,P.; Phonsavat,S.; Phiphakhavong,S.; Souriya,M.; Khambounheuang,B.; Chanphengxay,S.; Butler,J.; Shan,S.; Broz,I.; Morrissy,C.; Eagles,D.; Douangngeun,B.
EPI1785187	HA	Lao, People's Democratic Republic	2016-Apr-06	EPI_ISL_504916	A/chicken/Pak Ou District/NL-1942877/2016		Import from public-domain	Wong,F.Y.; Phommachanh,P.; Chanthavisouk,C.; Kalpravidh,W.; Mileto,P.; Davies,K.R.; Stevens,V.; Khounsy,S.; Bounma,P.; Phonsavat,S.; Phiphakhavong,S.; Souriya,M.; Khambounheuang,B.; Chanphengxay,S.; Butler,J.; Shan,S.; Broz,I.; Morrissy,C.; Eagles,D.; Douangngeun,B.
EPI1785189	HA	Lao, People's Democratic Republic	2016-Oct-05	EPI_ISL_504917	A/chicken/Luang Prabang District/NL-1942879/2016		Import from public-domain	Wong,F.Y.; Phommachanh,P.; Chanthavisouk,C.; Kalpravidh,W.; Mileto,P.; Davies,K.R.; Stevens,V.; Khounsy,S.; Bounma,P.; Phonsavat,S.; Phiphakhavong,S.; Souriya,M.; Khambounheuang,B.; Chanphengxay,S.; Butler,J.; Shan,S.; Broz,I.; Morrissy,C.; Eagles,D.; Douangngeun,B.
EPI1785731	HA	China	2017-Jan-12	EPI_ISL_505073	A/chicken/Sichuan/k141/2017		Import from public-domain	Xu,L.; Gu,M.; Ge,Z.; Wang,X.; Zhang,J.; Song,Q.; Hu,J.; Liu,X.; Hu,S.
EPI1819996	HA	China	2016-Jul-21	EPI_ISL_696707	A/duck/Hunan/7.21_YYGK41Y1-C/2016		Import from public-domain	Bi,Y.; Li,J.; Li,S.; Fu,G.; Jin,T.; Zhang,C.; Yang,Y.; Ma,Z.; Tian,W.; Xiao,S.; Li,L.; Yin,R.; Zhang,Y.; Wang,L.; Qin,Y.; Yao,Z.; Meng,F.; Hu,D.; Li,D.; Wong,G.; Liu,F.; Lv,N.; Fu,L.; Peng,Y.; Ma,J.; Sharshov,K.; Shestopalov,A.; Gulyaeva,M.; Gao,G.F.; Chen,J.; Shi,Y.; Liu,W.J.; Chu,D.; Huang,Y.; Liu,Y.; Liu,L.; Chen,Q.; Shi,W.
EPI1820261	HA	China	2016-Sep-27	EPI_ISL_696943	A/duck/Yunnan/9.27_DQXY003-O/2016		Import from public-domain	Bi,Y.; Li,J.; Li,S.; Fu,G.; Jin,T.; Zhang,C.; Yang,Y.; Ma,Z.; Tian,W.; Xiao,S.; Li,L.; Yin,R.; Zhang,Y.; Wang,L.; Qin,Y.; Yao,Z.; Meng,F.; Hu,D.; Li,D.; Wong,G.; Liu,F.; Lv,N.; Fu,L.; Peng,Y.; Ma,J.; Sharshov,K.; Shestopalov,A.; Gulyaeva,M.; Gao,G.F.; Chen,J.; Shi,Y.; Liu,W.J.; Chu,D.; Huang,Y.; Liu,Y.; Liu,L.; Chen,Q.; Shi,W.
EPI1820587	HA	China	2017-Jan-01	EPI_ISL_697837	A/duck/Henan/01.01_LYGL003-O/2017		Import from public-domain	Bi,Y.; Li,J.; Li,S.; Fu,G.; Jin,T.; Zhang,C.; Yang,Y.; Ma,Z.; Tian,W.; Xiao,S.; Li,L.; Yin,R.; Zhang,Y.; Wang,L.; Qin,Y.; Yao,Z.; Meng,F.; Hu,D.; Li,D.; Wong,G.; Liu,F.; Lv,N.; Fu,L.; Peng,Y.; Ma,J.; Sharshov,K.; Shestopalov,A.; Gulyaeva,M.; Gao,G.F.; Chen,J.; Shi,Y.; Liu,W.J.; Chu,D.; Huang,Y.; Liu,Y.; Liu,L.; Chen,Q.; Shi,W.
EPI1834399	HA	China	2017-Jan-01	EPI_ISL_697837	A/duck/Henan/01.01_LYGL003-O/2017		Import from public-domain	Bi,Y.; Li,J.; Li,S.; Fu,G.; Jin,T.; Zhang,C.; Yang,Y.; Ma,Z.; Tian,W.; Xiao,S.; Li,L.; Yin,R.; Zhang,Y.; Wang,L.; Qin,Y.; Yao,Z.; Meng,F.; Hu,D.; Li,D.; Wong,G.; Liu,F.; Lv,N.; Fu,L.; Peng,Y.; Ma,J.; Sharshov,K.; Shestopalov,A.; Gulyaeva,M.; Gao,G.F.; Chen,J.; Shi,Y.; Liu,W.J.; Chu,D.; Huang,Y.; Liu,Y.; Liu,L.; Chen,Q.; Shi,W.
EPI1820644	HA	China	2016-Dec-27	EPI_ISL_697851	A/chicken/Hunan/12.27_YYGK19J2-C/2016		Import from public-domain	Bi,Y.; Li,J.; Li,S.; Fu,G.; Jin,T.; Zhang,C.; Yang,Y.; Ma,Z.; Tian,W.; Xiao,S.; Li,L.; Yin,R.; Zhang,Y.; Wang,L.; Qin,Y.; Yao,Z.; Meng,F.; Hu,D.; Li,D.; Wong,G.; Liu,F.; Lv,N.; Fu,L.; Peng,Y.; Ma,J.; Sharshov,K.; Shestopalov,A.; Gulyaeva,M.; Gao,G.F.; Chen,J.; Shi,Y.; Liu,W.J.; Chu,D.; Huang,Y.; Liu,Y.; Liu,L.; Chen,Q.; Shi,W.
EPI1827759	HA	China	2016-Dec-27	EPI_ISL_697851	A/chicken/Hunan/12.27_YYGK19J2-C/2016		Import from public-domain	Bi,Y.; Li,J.; Li,S.; Fu,G.; Jin,T.; Zhang,C.; Yang,Y.; Ma,Z.; Tian,W.; Xiao,S.; Li,L.; Yin,R.; Zhang,Y.; Wang,L.; Qin,Y.; Yao,Z.; Meng,F.; Hu,D.; Li,D.; Wong,G.; Liu,F.; Lv,N.; Fu,L.; Peng,Y.; Ma,J.; Sharshov,K.; Shestopalov,A.; Gulyaeva,M.; Gao,G.F.; Chen,J.; Shi,Y.; Liu,W.J.; Chu,D.; Huang,Y.; Liu,Y.; Liu,L.; Chen,Q.; Shi,W.
EPI1843144	HA	Hong Kong (SAR)	2016-Nov-25	EPI_ISL_885147	A/Northern Pintail/HK/MP692/2016	Center of Influenza Research, School of Public Health, Li Ka Shing Faculty of Medicine, the University of Hong Kong	Li Ka Shing Faculty of Medicine, The University of Hong Kong	Bui, Christine HT; Kuok, Denise IT; Yeung, Hin Wo; Ng, Ka-Chun; Chu, Daniel KW; Webby, Richard J; Nicholls, John M; Peiris, JS Malik; Hui, Kenrie PY; Chan, Michael CW
EPI1850997	HA	Lao, People's Democratic Republic	2015-Sep-29	EPI_ISL_1290863	A/duck/Laos/XBY118/2015	NAHC	Centers for Disease Control and Prevention	Phommachanh, P.;Theppangna, W.;Khanthamaly, V
EPI1851005	HA	Lao, People's Democratic Republic	2016-Jul-01	EPI_ISL_1290864	A/chicken/Laos/NL-1621312/2016	NAHC	Centers for Disease Control and Prevention	Phommachanh, P.;Theppangna, W.;Khanthamaly, V
EPI1890367	HA	Vietnam	2016-Dec-30	EPI_ISL_4031450	A/Chicken/Viet Nam/AI-1606/2016		Import from public-domain	Le,T.B.; Le,V.P.; Yoon,S.-W.
EPI1890853	HA	Taiwan	2015-Feb-10	EPI_ISL_4032096	A/duck/Nantou/15A03445-11-20T/2015		Import from public-domain	Huang,C.W.; Chen,L.H.; Lee,D.H.; Liu,Y.P.; Li,W.C.; Lee,M.S.; Chen,Y.P.; Lee,F.; Chiou,C.J.; Lin,Y.J.; Lin,Y.-J.
EPI1890861	HA	Taiwan	2015-Jan-14	EPI_ISL_4032097	A/chicken/Changhua/15010120-1/2015		Import from public-domain	Huang,C.W.; Chen,L.H.; Lee,D.H.; Liu,Y.P.; Li,W.C.; Lee,M.S.; Chen,Y.P.; Lee,F.; Chiou,C.J.; Lin,Y.J.; Lin,Y.-J.
EPI1890869	HA	Taiwan	2015-Jan-18	EPI_ISL_4032098	A/chicken/Changhua/15010288/2015		Import from public-domain	Huang,C.W.; Chen,L.H.; Lee,D.H.; Liu,Y.P.; Li,W.C.; Lee,M.S.; Chen,Y.P.; Lee,F.; Chiou,C.J.; Lin,Y.J.; Lin,Y.-J.
EPI1890877	HA	Taiwan	2015-Jan-19	EPI_ISL_4032099	A/chicken/Changhua/15010324-2/2015		Import from public-domain	Huang,C.W.; Chen,L.H.; Lee,D.H.; Liu,Y.P.; Li,W.C.; Lee,M.S.; Chen,Y.P.; Lee,F.; Chiou,C.J.; Lin,Y.J.; Lin,Y.-J.
EPI1890885	HA	Taiwan	2015-Jan-20	EPI_ISL_4032104	A/chicken/Changhua/15010361-1/2015		Import from public-domain	Huang,C.W.; Chen,L.H.; Lee,D.H.; Liu,Y.P.; Li,W.C.; Lee,M.S.; Chen,Y.P.; Lee,F.; Chiou,C.J.; Lin,Y.J.; Lin,Y.-J.
EPI1890893	HA	Taiwan	2015-Jan-20	EPI_ISL_4032148	A/chicken/Changhua/15010362-2/2015		Import from public-domain	Huang,C.W.; Chen,L.H.; Lee,D.H.; Liu,Y.P.; Li,W.C.; Lee,M.S.; Chen,Y.P.; Lee,F.; Chiou,C.J.; Lin,Y.J.; Lin,Y.-J.
EPI1890901	HA	Taiwan	2015-Jan-20	EPI_ISL_4032190	A/chicken/Changhua/15010363-2/2015		Import from public-domain	Huang,C.W.; Chen,L.H.; Lee,D.H.; Liu,Y.P.; Li,W.C.; Lee,M.S.; Chen,Y.P.; Lee,F.; Chiou,C.J.; Lin,Y.J.; Lin,Y.-J.
EPI1891283	HA	Taiwan	2015-Jan-20	EPI_ISL_4032248	A/chicken/Pingtung/15010402/2015		Import from public-domain	Huang,C.W.; Chen,L.H.; Lee,D.H.; Liu,Y.P.; Li,W.C.; Lee,M.S.; Chen,Y.P.; Lee,F.; Chiou,C.J.; Lin,Y.J.; Lin,Y.-J.
EPI1892554	HA	Taiwan	2015-Apr-23	EPI_ISL_4055115	A/goose/Yunlin/15040040/2015		Import from public-domain	Huang,C.W.; Chen,L.H.; Lee,D.H.; Liu,Y.P.; Li,W.C.; Lee,M.S.; Chen,Y.P.; Lee,F.; Chiou,C.J.; Lin,Y.J.; Lin,Y.-J.
EPI1892562	HA	Taiwan	2016-Feb-10	EPI_ISL_4055116	A/goose/Yunlin/16020008-4/2016		Import from public-domain	Huang,C.W.; Chen,L.H.; Lee,D.H.; Liu,Y.P.; Li,W.C.; Lee,M.S.; Chen,Y.P.; Lee,F.; Chiou,C.J.; Lin,Y.J.; Lin,Y.-J.
EPI1892570	HA	Taiwan	2016-Feb-14	EPI_ISL_4055117	A/goose/Yunlin/16020011-1/2016		Import from public-domain	Huang,C.W.; Chen,L.H.; Lee,D.H.; Liu,Y.P.; Li,W.C.; Lee,M.S.; Chen,Y.P.; Lee,F.; Chiou,C.J.; Lin,Y.J.; Lin,Y.-J.
EPI1892578	HA	Taiwan	2016-Mar-23	EPI_ISL_4055118	A/goose/Yunlin/16030042-2/2016		Import from public-domain	Huang,C.W.; Chen,L.H.; Lee,D.H.; Liu,Y.P.; Li,W.C.; Lee,M.S.; Chen,Y.P.; Lee,F.; Chiou,C.J.; Lin,Y.J.; Lin,Y.-J.
EPI1892586	HA	Taiwan	2016-Mar-31	EPI_ISL_4055119	A/goose/Yunlin/16040002-2/2016		Import from public-domain	Huang,C.W.; Chen,L.H.; Lee,D.H.; Liu,Y.P.; Li,W.C.; Lee,M.S.; Chen,Y.P.; Lee,F.; Chiou,C.J.; Lin,Y.J.; Lin,Y.-J.
EPI1892674	HA	Taiwan	2017-Jan-11	EPI_ISL_4055130	A/heron/Taiwan/17DB0001/2017		Import from public-domain	Huang,C.W.; Chen,L.H.; Lee,D.H.; Liu,Y.P.; Li,W.C.; Lee,M.S.; Chen,Y.P.; Lee,F.; Chiou,C.J.; Lin,Y.J.; Lin,Y.-J.
EPI1892682	HA	Taiwan	2015-Dec-14	EPI_ISL_4055131	A/thrush/Taiwan/15120021/2015		Import from public-domain	Huang,C.W.; Chen,L.H.; Lee,D.H.; Liu,Y.P.; Li,W.C.; Lee,M.S.; Chen,Y.P.; Lee,F.; Chiou,C.J.; Lin,Y.J.; Lin,Y.-J.
EPI1892690	HA	Taiwan	2016-Jan-05	EPI_ISL_4055132	A/turkey/Changhua/16010011-1/2016		Import from public-domain	Huang,C.W.; Chen,L.H.; Lee,D.H.; Liu,Y.P.; Li,W.C.; Lee,M.S.; Chen,Y.P.; Lee,F.; Chiou,C.J.; Lin,Y.J.; Lin,Y.-J.
EPI1892722	HA	Taiwan	2015-Mar-29	EPI_ISL_4055137	A/turkey/Yunlin/15030069-1/2015		Import from public-domain	Huang,C.W.; Chen,L.H.; Lee,D.H.; Liu,Y.P.; Li,W.C.; Lee,M.S.; Chen,Y.P.; Lee,F.; Chiou,C.J.; Lin,Y.J.; Lin,Y.-J.
EPI1892730	HA	Taiwan	2015-Jun-29	EPI_ISL_4055138	A/turkey/Yunlin/15060049-1/2015		Import from public-domain	Huang,C.W.; Chen,L.H.; Lee,D.H.; Liu,Y.P.; Li,W.C.; Lee,M.S.; Chen,Y.P.; Lee,F.; Chiou,C.J.; Lin,Y.J.; Lin,Y.-J.
EPI1898251	HA	Korea, Republic of	2016-Nov-25	EPI_ISL_4063592	A/duck/South Korea/S57/2016		Import from public-domain	Seo,S.H.; Lee,I.H.
EPI1898275	HA	Japan	2015-Feb-23	EPI_ISL_4063596	A/duck/Tottori/K191/2015		Import from public-domain	Soda,K.; Higurashi,N.; Hanayama,S.; Ito,H.; Ito,T.
EPI1903543	HA	China	2016-Feb-01	EPI_ISL_4071929	A/chicken/Zhejiang/6107/2016		Import from public-domain	Yang,F.; Wu,H.
EPI1903551	HA	China	2016-Oct-01	EPI_ISL_4071930	A/chicken/Zhejiang/13160/2016		Import from public-domain	Yang,F.; Wu,H.
EPI1903559	HA	China	2016-May-01	EPI_ISL_4071931	A/chicken/Zhejiang/528127/2016		Import from public-domain	Yang,F.; Wu,H.
EPI1903671	HA	China	2016-Oct-01	EPI_ISL_4072009	A/chicken/Zhejiang/102637/2016		Import from public-domain	Yang,F.; Wu,H.
EPI1903768	HA	China	2016-Nov-01	EPI_ISL_4072173	A/chicken/Zhejiang/1130131/2016		Import from public-domain	Yang,F.; Wu,H.
EPI2376445	HA	Korea, Republic of	2016-Dec-15	EPI_ISL_16839572	A/goose/South Korea/JB17/2016		Import from public-domain	Nam,J.-H.; Espano,E.; Song,E.-J.; Shim,S.-M.; Na,W.; Jung,S.-H.; Song,D.; Kim,J.-K.
EPI2376447	HA	Korea, Republic of	2016-Dec-15	EPI_ISL_16839573	A/goose/South Korea/JB18/2016		Import from public-domain	Nam,J.-H.; Espano,E.; Song,E.-J.; Shim,S.-M.; Na,W.; Jung,S.-H.; Song,D.; Kim,J.-K.
EPI2376448	HA	Korea, Republic of	2016-Dec-15	EPI_ISL_16839574	A/goose/South Korea/JB19/2016		Import from public-domain	Nam,J.-H.; Espano,E.; Song,E.-J.; Shim,S.-M.; Na,W.; Jung,S.-H.; Song,D.; Kim,J.-K.
EPI2463564	HA	Iran, Islamic Republic of	2016-Dec-01	EPI_ISL_17212738	A/goose/Iran/GSE-180/2016		Import from public-domain	shoushtari,A.; keyvanfar,H.; Motahhar,M.; Abtin,A.; Eshratabadi,F.
EPI2580006	HA	Taiwan	2015-Jan-09	EPI_ISL_17733058	A/goose/Taiwan/01-003/2015		Import from public-domain	Lee,M.S.; Chen,L.H.; Chen,Y.P.; Liu,Y.P.; Li,W.C.; Lin,Y.L.; Lee,F.; Ting,L.J.
EPI2580007	HA	Taiwan	2015-Jan-09	EPI_ISL_17733059	A/goose/Taiwan/01-004/2015		Import from public-domain	Lee,M.S.; Chen,L.H.; Chen,Y.P.; Liu,Y.P.; Li,W.C.; Lin,Y.L.; Lee,F.; Ting,L.J.
EPI2580008	HA	Taiwan	2015-Jan-12	EPI_ISL_17733060	A/goose/Taiwan/01-042/2015		Import from public-domain	Lee,M.S.; Chen,L.H.; Chen,Y.P.; Liu,Y.P.; Li,W.C.; Lin,Y.L.; Lee,F.; Ting,L.J.
EPI2580011	HA	China	2015-Jan-06	EPI_ISL_17733061	A/common pochard/Henan/09L/2015		Import from public-domain	Su,W.; Xing,C.; Zhao,N.; Luo,J.; Li,Q.; Wu,Y.; Li,M.; Wang,C.; Ding,H.; He,H.
EPI2580153	HA	India	2015-Apr-01	EPI_ISL_17733433	A/chicken/India/04CA01/2015		Import from public-domain	Tosh,C.; Agarwal,S.; Nagarajan,S.; Kumar,M.; Murugkar,H.V.; Kulkarni,D.D.
EPI2580155	HA	Taiwan	2015-Jan-19	EPI_ISL_17733435	A/night heron/Taiwan/A289/2015		Import from public-domain	Lee,M.S.; Chen,L.H.; Liu,Y.P.; Chen,Y.P.; Li,W.C.; Lee,F.; Ting,L.J.; Lin,Y.L.
EPI2580156	HA	Taiwan	2015-Jan-17	EPI_ISL_17733436	A/thrush/Taiwan/A234/2015		Import from public-domain	Lee,M.S.; Chen,L.H.; Liu,Y.P.; Chen,Y.P.; Li,W.C.; Lee,F.; Ting,L.J.; Lin,Y.L.
EPI2580157	HA	Taiwan	2015-Jan-15	EPI_ISL_17733437	A/bulbul/Taiwan/01156/2015		Import from public-domain	Lee,M.S.; Chen,L.H.; Liu,Y.P.; Chen,Y.P.; Li,W.C.; Lee,F.; Ting,L.J.; Lin,Y.L.
EPI2580225	HA	China	2015-Jan-07	EPI_ISL_17733505	A/wild bird/Jiangxi/P560/2015		Import from public-domain	Jiang,W.; Hou,G.
EPI2580226	HA	China	2015-Jan-07	EPI_ISL_17733506	A/wild bird/Jiangxi/P410/2015		Import from public-domain	Jiang,W.; Hou,G.
EPI2580227	HA	China	2015-Jan-07	EPI_ISL_17733507	A/wild bird/Jiangxi/P38/2015		Import from public-domain	Jiang,W.; Hou,G.
EPI2580228	HA	China	2015-Jan-07	EPI_ISL_17733508	A/wild bird/Jiangxi/P31/2015		Import from public-domain	Jiang,W.; Hou,G.
EPI2580229	HA	China	2015-Jan-07	EPI_ISL_17733509	A/wild bird/Jiangxi/P21/2015		Import from public-domain	Jiang,W.; Hou,G.
EPI2580230	HA	China	2015-Jan-07	EPI_ISL_17733510	A/wild bird/Jiangxi/PLZ6/2015		Import from public-domain	Jiang,W.; Hou,G.
EPI2580231	HA	China	2015-Jan-07	EPI_ISL_17733511	A/wild bird/Jiangxi/P0975/2015		Import from public-domain	Jiang,W.; Hou,G.
EPI2580232	HA	China	2015-Jan-07	EPI_ISL_17733512	A/wild bird/Jiangxi/P562/2015		Import from public-domain	Jiang,W.; Hou,G.
EPI2580233	HA	China	2015-Jan-07	EPI_ISL_17733513	A/wild bird/Jiangxi/P469/2015		Import from public-domain	Jiang,W.; Hou,G.
EPI2580234	HA	China	2015-Jan-07	EPI_ISL_17733514	A/wild bird/Jiangxi/P237/2015		Import from public-domain	Jiang,W.; Hou,G.
EPI2580235	HA	China	2015-Jan-07	EPI_ISL_17733515	A/wild bird/Jiangxi/P126/2015		Import from public-domain	Jiang,W.; Hou,G.
EPI2580237	HA	Vietnam	2015-Aug-15	EPI_ISL_17733516	A/duck/Vietnam/HU3-386/2015		Import from public-domain	Nguyen,T.L.; Hiono,T.; Matsuno,K.; Okamatsu,M.; Kida,H.; Sakoda,Y.; Hatamachi,J.
EPI2580238	HA	Vietnam	2015-Aug-15	EPI_ISL_17733517	A/duck/Vietnam/HU3-408/2015		Import from public-domain	Nguyen,T.L.; Hiono,T.; Matsuno,K.; Okamatsu,M.; Kida,H.; Sakoda,Y.; Hatamachi,J.
EPI2580240	HA	Vietnam	2015-Aug-15	EPI_ISL_17733519	A/duck/Vietnam/HU3-567/2015		Import from public-domain	Nguyen,T.L.; Hiono,T.; Matsuno,K.; Okamatsu,M.; Kida,H.; Sakoda,Y.; Hatamachi,J.
EPI2580241	HA	Vietnam	2015-Aug-15	EPI_ISL_17733520	A/duck/Vietnam/HU3-574/2015		Import from public-domain	Nguyen,T.L.; Hiono,T.; Matsuno,K.; Okamatsu,M.; Kida,H.; Sakoda,Y.; Hatamachi,J.
EPI2580242	HA	Vietnam	2015-Aug-15	EPI_ISL_17733521	A/duck/Vietnam/HU3-575/2015		Import from public-domain	Nguyen,T.L.; Hiono,T.; Matsuno,K.; Okamatsu,M.; Kida,H.; Sakoda,Y.; Hatamachi,J.
EPI2580243	HA	Vietnam	2015-Aug-15	EPI_ISL_17733522	A/duck/Vietnam/HU3-579/2015		Import from public-domain	Nguyen,T.L.; Hiono,T.; Matsuno,K.; Okamatsu,M.; Kida,H.; Sakoda,Y.; Hatamachi,J.
EPI2580244	HA	Vietnam	2015-Aug-15	EPI_ISL_17733523	A/duck/Vietnam/HU3-584/2015		Import from public-domain	Nguyen,T.L.; Hiono,T.; Matsuno,K.; Okamatsu,M.; Kida,H.; Sakoda,Y.; Hatamachi,J.
EPI2580245	HA	Vietnam	2015-Aug-15	EPI_ISL_17733524	A/duck/Vietnam/HU3-589/2015		Import from public-domain	Nguyen,T.L.; Hiono,T.; Matsuno,K.; Okamatsu,M.; Kida,H.; Sakoda,Y.; Hatamachi,J.
EPI2580246	HA	Vietnam	2015-Aug-15	EPI_ISL_17733525	A/duck/Vietnam/HU3-617/2015		Import from public-domain	Nguyen,T.L.; Hiono,T.; Matsuno,K.; Okamatsu,M.; Kida,H.; Sakoda,Y.; Hatamachi,J.
EPI2580247	HA	Vietnam	2015-Aug-15	EPI_ISL_17733526	A/duck/Vietnam/HU3-662/2015		Import from public-domain	Nguyen,T.L.; Hiono,T.; Matsuno,K.; Okamatsu,M.; Kida,H.; Sakoda,Y.; Hatamachi,J.
EPI2580248	HA	Vietnam	2015-Aug-15	EPI_ISL_17733527	A/duck/Vietnam/HU3-708/2015		Import from public-domain	Nguyen,T.L.; Hiono,T.; Matsuno,K.; Okamatsu,M.; Kida,H.; Sakoda,Y.; Hatamachi,J.
EPI2580249	HA	Vietnam	2015-Aug-15	EPI_ISL_17733528	A/chicken/Vietnam/HU3-721/2015		Import from public-domain	Nguyen,T.L.; Hiono,T.; Matsuno,K.; Okamatsu,M.; Kida,H.; Sakoda,Y.; Hatamachi,J.
EPI2580251	HA	Vietnam	2015-Aug-15	EPI_ISL_17733530	A/chicken/Vietnam/HU3-737/2015		Import from public-domain	Nguyen,T.L.; Hiono,T.; Matsuno,K.; Okamatsu,M.; Kida,H.; Sakoda,Y.; Hatamachi,J.
EPI2580252	HA	Vietnam	2015-Aug-15	EPI_ISL_17733531	A/duck/Vietnam/HU3-759/2015		Import from public-domain	Nguyen,T.L.; Hiono,T.; Matsuno,K.; Okamatsu,M.; Kida,H.; Sakoda,Y.; Hatamachi,J.
EPI2580253	HA	Vietnam	2015-Aug-15	EPI_ISL_17733532	A/chicken/Vietnam/HU3-770/2015		Import from public-domain	Nguyen,T.L.; Hiono,T.; Matsuno,K.; Okamatsu,M.; Kida,H.; Sakoda,Y.; Hatamachi,J.
EPI2580254	HA	Vietnam	2015-Aug-15	EPI_ISL_17733533	A/chicken/Vietnam/HU3-800/2015		Import from public-domain	Nguyen,T.L.; Hiono,T.; Matsuno,K.; Okamatsu,M.; Kida,H.; Sakoda,Y.; Hatamachi,J.
EPI2580255	HA	Vietnam	2015-Aug-15	EPI_ISL_17733534	A/duck/Vietnam/HU3-835/2015		Import from public-domain	Nguyen,T.L.; Hiono,T.; Matsuno,K.; Okamatsu,M.; Kida,H.; Sakoda,Y.; Hatamachi,J.
EPI2580257	HA	Vietnam	2015-Aug-15	EPI_ISL_17733536	A/chicken/Vietnam/HU3-879/2015		Import from public-domain	Nguyen,T.L.; Hiono,T.; Matsuno,K.; Okamatsu,M.; Kida,H.; Sakoda,Y.; Hatamachi,J.
EPI2580258	HA	Vietnam	2015-Aug-15	EPI_ISL_17733537	A/chicken/Vietnam/HU3-885/2015		Import from public-domain	Nguyen,T.L.; Hiono,T.; Matsuno,K.; Okamatsu,M.; Kida,H.; Sakoda,Y.; Hatamachi,J.
EPI2580259	HA	Vietnam	2015-Aug-15	EPI_ISL_17733538	A/duck/Vietnam/HU3-898/2015		Import from public-domain	Nguyen,T.L.; Hiono,T.; Matsuno,K.; Okamatsu,M.; Kida,H.; Sakoda,Y.; Hatamachi,J.
EPI2580262	HA	Vietnam	2015-Aug-15	EPI_ISL_17733541	A/duck/Vietnam/HU3-1079/2015		Import from public-domain	Nguyen,T.L.; Hiono,T.; Matsuno,K.; Okamatsu,M.; Kida,H.; Sakoda,Y.; Hatamachi,J.
EPI2580263	HA	Vietnam	2015-Aug-15	EPI_ISL_17733542	A/duck/Vietnam/HU3-1126/2015		Import from public-domain	Nguyen,T.L.; Hiono,T.; Matsuno,K.; Okamatsu,M.; Kida,H.; Sakoda,Y.; Hatamachi,J.
EPI2580264	HA	Vietnam	2015-Aug-15	EPI_ISL_17733543	A/duck/Vietnam/HU3-1265/2015		Import from public-domain	Nguyen,T.L.; Hiono,T.; Matsuno,K.; Okamatsu,M.; Kida,H.; Sakoda,Y.; Hatamachi,J.
EPI2580265	HA	Vietnam	2015-Aug-15	EPI_ISL_17733544	A/chicken/Vietnam/HU3-1308/2015		Import from public-domain	Nguyen,T.L.; Hiono,T.; Matsuno,K.; Okamatsu,M.; Kida,H.; Sakoda,Y.; Hatamachi,J.
EPI2580266	HA	Vietnam	2015-Aug-15	EPI_ISL_17733545	A/chicken/Vietnam/HU3-1317/2015		Import from public-domain	Nguyen,T.L.; Hiono,T.; Matsuno,K.; Okamatsu,M.; Kida,H.; Sakoda,Y.; Hatamachi,J.
EPI2580267	HA	Vietnam	2015-Aug-15	EPI_ISL_17733546	A/duck/Vietnam/HU3-1360/2015		Import from public-domain	Nguyen,T.L.; Hiono,T.; Matsuno,K.; Okamatsu,M.; Kida,H.; Sakoda,Y.; Hatamachi,J.
EPI2580268	HA	Vietnam	2015-Aug-15	EPI_ISL_17733547	A/duck/Vietnam/HU3-1403/2015		Import from public-domain	Nguyen,T.L.; Hiono,T.; Matsuno,K.; Okamatsu,M.; Kida,H.; Sakoda,Y.; Hatamachi,J.
EPI2580269	HA	Vietnam	2015-Aug-15	EPI_ISL_17733548	A/duck/Vietnam/HU3-1408/2015		Import from public-domain	Nguyen,T.L.; Hiono,T.; Matsuno,K.; Okamatsu,M.; Kida,H.; Sakoda,Y.; Hatamachi,J.
EPI2580270	HA	Vietnam	2015-Aug-15	EPI_ISL_17733549	A/duck/Vietnam/HU3-1411/2015		Import from public-domain	Nguyen,T.L.; Hiono,T.; Matsuno,K.; Okamatsu,M.; Kida,H.; Sakoda,Y.; Hatamachi,J.
EPI2580272	HA	Vietnam	2015-Aug-15	EPI_ISL_17733551	A/chicken/Vietnam/HU3-1518/2015		Import from public-domain	Nguyen,T.L.; Hiono,T.; Matsuno,K.; Okamatsu,M.; Kida,H.; Sakoda,Y.; Hatamachi,J.
EPI2580273	HA	Vietnam	2015-Aug-15	EPI_ISL_17733552	A/duck/Vietnam/HU3-Z2/2015		Import from public-domain	Nguyen,T.L.; Hiono,T.; Matsuno,K.; Okamatsu,M.; Kida,H.; Sakoda,Y.; Hatamachi,J.
EPI2580274	HA	Vietnam	2015-Aug-15	EPI_ISL_17733553	A/duck/Vietnam/HU3-Z10/2015		Import from public-domain	Nguyen,T.L.; Hiono,T.; Matsuno,K.; Okamatsu,M.; Kida,H.; Sakoda,Y.; Hatamachi,J.
EPI2580275	HA	Vietnam	2015-Aug-15	EPI_ISL_17733554	A/chicken/Vietnam/HU3-Z12/2015		Import from public-domain	Nguyen,T.L.; Hiono,T.; Matsuno,K.; Okamatsu,M.; Kida,H.; Sakoda,Y.; Hatamachi,J.
EPI2580277	HA	Japan	2017-Jan-15	EPI_ISL_17733555	A/bean goose/Japan/1701A012/2017		Import from public-domain	Soda,K.; Usui,T.; Ito,H.; Ozaki,H.; Yamaguchi,T.; Ito,T.
EPI2580279	HA	Vietnam	2015-Dec-08	EPI_ISL_17733557	A/duck/Vietnam/LBM837/2015		Import from public-domain	Soda,K.; Nguyen,K.H.; Trang,H.U.; Le,Q.M.; Ito,T.; Le.Q.M.
EPI2580280	HA	Vietnam	2015-Nov-14	EPI_ISL_17733564	A/chicken/Vietnam/187522/2015		Import from public-domain	Soda,K.; Nguyen,K.H.; Trang,H.U.; Le,Q.M.; Ito,T.; Le.Q.M.
EPI2580281	HA	Vietnam	2015-Nov-14	EPI_ISL_17733579	A/chicken/Vietnam/124/2015		Import from public-domain	Soda,K.; Nguyen,K.H.; Trang,H.U.; Le,Q.M.; Ito,T.; Le.Q.M.
EPI2584952	HA	Vietnam	2015-Nov-14	EPI_ISL_17768722	A/chicken/Nha Trang/122/2015	Avian Zoonosis Research Center	Import from public-domain	Soda,K., Nguyen,K.H., Trang,H.U., Le,Q.M.; Ito,T.
EPI2584953	HA	Vietnam	2015-Nov-14	EPI_ISL_17768723	A/chicken/Nha Trang/124/2015	Avian Zoonosis Research Center	Import from public-domain	Soda,K., Nguyen,K.H., Trang,H.U., Le,Q.M.; Ito,T.
EPI2584954	HA	Vietnam	2015-Nov-14	EPI_ISL_17768724	A/chicken/Nha Trang/127/2015	Avian Zoonosis Research Center	Import from public-domain	Soda,K., Nguyen,K.H., Trang,H.U., Le,Q.M.; Ito,T.
EPI2584955	HA	Vietnam	2015-Nov-14	EPI_ISL_17768725	A/chicken/Nha Trang/128/2015	Avian Zoonosis Research Center	Import from public-domain	Soda,K., Nguyen,K.H., Trang,H.U., Le,Q.M.; Ito,T.
EPI2584956	HA	Vietnam	2015-Nov-14	EPI_ISL_17768726	A/chicken/Nha Trang/129/2015	Avian Zoonosis Research Center	Import from public-domain	Soda,K., Nguyen,K.H., Trang,H.U., Le,Q.M.; Ito,T.
EPI2584959	HA	Vietnam	2016-Mar-04	EPI_ISL_17768729	A/muscovy duck/Quang Ninh/254/2016	Avian Zoonosis Research Center	Import from public-domain	Soda,K., Nguyen,K.H., Trang,H.U., Le,Q.M.; Ito,T.
EPI2584963	HA	Vietnam	2015-Aug-15	EPI_ISL_17768750	A/duck/Vietnam/HU3-1126/2015	Graduate School of Veterinary Medicine, Hokkaido University	Import from public-domain	Nguyen,T.L., Hiono,T., Matsuno,K., Okamatsu,M., Kida,H.; Sakoda,Y.
EPI2584964	HA	Vietnam	2015-Aug-15	EPI_ISL_17768751	A/duck/Vietnam/HU3-1265/2015	Graduate School of Veterinary Medicine, Hokkaido University	Import from public-domain	Nguyen,T.L., Hiono,T., Matsuno,K., Okamatsu,M., Kida,H.; Sakoda,Y.
EPI2584965	HA	Vietnam	2015-Aug-15	EPI_ISL_17768752	A/duck/Vietnam/HU3-386/2015	Graduate School of Veterinary Medicine, Hokkaido University	Import from public-domain	Nguyen,T.L., Hiono,T., Matsuno,K., Okamatsu,M., Kida,H.; Sakoda,Y.
EPI2584966	HA	Vietnam	2015-Aug-15	EPI_ISL_17768753	A/duck/Vietnam/HU3-408/2015	Graduate School of Veterinary Medicine, Hokkaido University	Import from public-domain	Nguyen,T.L., Hiono,T., Matsuno,K., Okamatsu,M., Kida,H.; Sakoda,Y.
EPI2584967	HA	Vietnam	2015-Aug-15	EPI_ISL_17768754	A/duck/Vietnam/HU3-567/2015	Graduate School of Veterinary Medicine, Hokkaido University	Import from public-domain	Nguyen,T.L., Hiono,T., Matsuno,K., Okamatsu,M., Kida,H.; Sakoda,Y.
EPI2584968	HA	Vietnam	2015-Aug-15	EPI_ISL_17768755	A/duck/Vietnam/HU3-574/2015	Graduate School of Veterinary Medicine, Hokkaido University	Import from public-domain	Nguyen,T.L., Hiono,T., Matsuno,K., Okamatsu,M., Kida,H.; Sakoda,Y.
EPI2584969	HA	Vietnam	2015-Aug-15	EPI_ISL_17768756	A/duck/Vietnam/HU3-617/2015	Graduate School of Veterinary Medicine, Hokkaido University	Import from public-domain	Nguyen,T.L., Hiono,T., Matsuno,K., Okamatsu,M., Kida,H.; Sakoda,Y.
EPI2584970	HA	Vietnam	2015-Aug-15	EPI_ISL_17768757	A/duck/Vietnam/HU3-708/2015	Graduate School of Veterinary Medicine, Hokkaido University	Import from public-domain	Nguyen,T.L., Hiono,T., Matsuno,K., Okamatsu,M., Kida,H.; Sakoda,Y.
EPI2584971	HA	Vietnam	2015-Aug-15	EPI_ISL_17768758	A/duck/Vietnam/HU3-898/2015	Graduate School of Veterinary Medicine, Hokkaido University	Import from public-domain	Nguyen,T.L., Hiono,T., Matsuno,K., Okamatsu,M., Kida,H.; Sakoda,Y.
EPI2584972	HA	Vietnam	2015-Aug-15	EPI_ISL_17768759	A/Muscovy duck/Vietnam/HU3-1079/2015	Graduate School of Veterinary Medicine, Hokkaido University	Import from public-domain	Nguyen,T.L., Hiono,T., Matsuno,K., Okamatsu,M., Kida,H.; Sakoda,Y.
EPI2584973	HA	Vietnam	2015-Aug-15	EPI_ISL_17768760	A/Muscovy duck/Vietnam/HU3-1360/2015	Graduate School of Veterinary Medicine, Hokkaido University	Import from public-domain	Nguyen,T.L., Hiono,T., Matsuno,K., Okamatsu,M., Kida,H.; Sakoda,Y.
EPI2584974	HA	Vietnam	2015-Aug-15	EPI_ISL_17768761	A/Muscovy duck/Vietnam/HU3-1403/2015	Graduate School of Veterinary Medicine, Hokkaido University	Import from public-domain	Nguyen,T.L., Hiono,T., Matsuno,K., Okamatsu,M., Kida,H.; Sakoda,Y.
EPI2584975	HA	Vietnam	2015-Aug-15	EPI_ISL_17768762	A/Muscovy duck/Vietnam/HU3-1408/2015	Graduate School of Veterinary Medicine, Hokkaido University	Import from public-domain	Nguyen,T.L., Hiono,T., Matsuno,K., Okamatsu,M., Kida,H.; Sakoda,Y.
EPI2584976	HA	Vietnam	2015-Aug-15	EPI_ISL_17768763	A/Muscovy duck/Vietnam/HU3-1411/2015	Graduate School of Veterinary Medicine, Hokkaido University	Import from public-domain	Nguyen,T.L., Hiono,T., Matsuno,K., Okamatsu,M., Kida,H.; Sakoda,Y.
EPI2584977	HA	Vietnam	2015-Aug-15	EPI_ISL_17768764	A/Muscovy duck/Vietnam/HU3-575/2015	Graduate School of Veterinary Medicine, Hokkaido University	Import from public-domain	Nguyen,T.L., Hiono,T., Matsuno,K., Okamatsu,M., Kida,H.; Sakoda,Y.
EPI2584978	HA	Vietnam	2015-Aug-15	EPI_ISL_17768765	A/Muscovy duck/Vietnam/HU3-579/2015	Graduate School of Veterinary Medicine, Hokkaido University	Import from public-domain	Nguyen,T.L., Hiono,T., Matsuno,K., Okamatsu,M., Kida,H.; Sakoda,Y.
EPI2584979	HA	Vietnam	2015-Aug-15	EPI_ISL_17768766	A/Muscovy duck/Vietnam/HU3-584/2015	Graduate School of Veterinary Medicine, Hokkaido University	Import from public-domain	Nguyen,T.L., Hiono,T., Matsuno,K., Okamatsu,M., Kida,H.; Sakoda,Y.
EPI2584980	HA	Vietnam	2015-Aug-15	EPI_ISL_17768767	A/Muscovy duck/Vietnam/HU3-589/2015	Graduate School of Veterinary Medicine, Hokkaido University	Import from public-domain	Nguyen,T.L., Hiono,T., Matsuno,K., Okamatsu,M., Kida,H.; Sakoda,Y.
EPI2584981	HA	Vietnam	2015-Aug-15	EPI_ISL_17768768	A/Muscovy duck/Vietnam/HU3-662/2015	Graduate School of Veterinary Medicine, Hokkaido University	Import from public-domain	Nguyen,T.L., Hiono,T., Matsuno,K., Okamatsu,M., Kida,H.; Sakoda,Y.
EPI2584982	HA	Vietnam	2015-Aug-15	EPI_ISL_17768769	A/Muscovy duck/Vietnam/HU3-759/2015	Graduate School of Veterinary Medicine, Hokkaido University	Import from public-domain	Nguyen,T.L., Hiono,T., Matsuno,K., Okamatsu,M., Kida,H.; Sakoda,Y.
EPI2584983	HA	Vietnam	2015-Aug-15	EPI_ISL_17768770	A/Muscovy duck/Vietnam/HU3-835/2015	Graduate School of Veterinary Medicine, Hokkaido University	Import from public-domain	Nguyen,T.L., Hiono,T., Matsuno,K., Okamatsu,M., Kida,H.; Sakoda,Y.
EPI2584984	HA	Vietnam	2015-Aug-15	EPI_ISL_17768771	A/Muscovy duck/Vietnam/HU3-Z10/2015	Graduate School of Veterinary Medicine, Hokkaido University	Import from public-domain	Nguyen,T.L., Hiono,T., Matsuno,K., Okamatsu,M., Kida,H.; Sakoda,Y.
EPI2584985	HA	Vietnam	2015-Aug-15	EPI_ISL_17768772	A/Muscovy duck/Vietnam/HU3-Z2/2015	Graduate School of Veterinary Medicine, Hokkaido University	Import from public-domain	Nguyen,T.L., Hiono,T., Matsuno,K., Okamatsu,M., Kida,H.; Sakoda,Y.
EPI2584992	HA	Vietnam	2015-Aug-15	EPI_ISL_17768779	A/chicken/Vietnam/HU3-1308/2015	Graduate School of Veterinary Medicine, Hokkaido University	Import from public-domain	Nguyen,T.L., Hiono,T., Matsuno,K., Okamatsu,M., Kida,H.; Sakoda,Y.
EPI2584993	HA	Vietnam	2015-Aug-15	EPI_ISL_17768780	A/chicken/Vietnam/HU3-1317/2015	Graduate School of Veterinary Medicine, Hokkaido University	Import from public-domain	Nguyen,T.L., Hiono,T., Matsuno,K., Okamatsu,M., Kida,H.; Sakoda,Y.
EPI2584994	HA	Vietnam	2015-Aug-15	EPI_ISL_17768781	A/chicken/Vietnam/HU3-1518/2015	Graduate School of Veterinary Medicine, Hokkaido University	Import from public-domain	Nguyen,T.L., Hiono,T., Matsuno,K., Okamatsu,M., Kida,H.; Sakoda,Y.
EPI2584995	HA	Vietnam	2015-Aug-15	EPI_ISL_17768782	A/chicken/Vietnam/HU3-721/2015	Graduate School of Veterinary Medicine, Hokkaido University	Import from public-domain	Nguyen,T.L., Hiono,T., Matsuno,K., Okamatsu,M., Kida,H.; Sakoda,Y.
EPI2584996	HA	Vietnam	2015-Aug-15	EPI_ISL_17768783	A/chicken/Vietnam/HU3-737/2015	Graduate School of Veterinary Medicine, Hokkaido University	Import from public-domain	Nguyen,T.L., Hiono,T., Matsuno,K., Okamatsu,M., Kida,H.; Sakoda,Y.
EPI2584997	HA	Vietnam	2015-Aug-15	EPI_ISL_17768784	A/chicken/Vietnam/HU3-770/2015	Graduate School of Veterinary Medicine, Hokkaido University	Import from public-domain	Nguyen,T.L., Hiono,T., Matsuno,K., Okamatsu,M., Kida,H.; Sakoda,Y.
EPI2584998	HA	Vietnam	2015-Aug-15	EPI_ISL_17768785	A/chicken/Vietnam/HU3-800/2015	Graduate School of Veterinary Medicine, Hokkaido University	Import from public-domain	Nguyen,T.L., Hiono,T., Matsuno,K., Okamatsu,M., Kida,H.; Sakoda,Y.
EPI2584999	HA	Vietnam	2015-Aug-15	EPI_ISL_17768786	A/chicken/Vietnam/HU3-879/2015	Graduate School of Veterinary Medicine, Hokkaido University	Import from public-domain	Nguyen,T.L., Hiono,T., Matsuno,K., Okamatsu,M., Kida,H.; Sakoda,Y.
EPI2585000	HA	Vietnam	2015-Aug-15	EPI_ISL_17768787	A/chicken/Vietnam/HU3-885/2015	Graduate School of Veterinary Medicine, Hokkaido University	Import from public-domain	Nguyen,T.L., Hiono,T., Matsuno,K., Okamatsu,M., Kida,H.; Sakoda,Y.
EPI2585001	HA	Vietnam	2015-Aug-15	EPI_ISL_17768788	A/chicken/Vietnam/HU3-Z12/2015	Graduate School of Veterinary Medicine, Hokkaido University	Import from public-domain	Nguyen,T.L., Hiono,T., Matsuno,K., Okamatsu,M., Kida,H.; Sakoda,Y.
EPI2585004	HA	Vietnam	2015-Oct-25	EPI_ISL_17768791	A/muscovy duck/Vietnam/HN-2501/2015	J. Craig Venter Institute	Import from public-domain	Tan,G., Pickett,B., Fedorova,N., Amedeo,P., Isom,R., Hu,L., Christensen,J., Miller,J., Durbin,A., Williams,T., Arumemi,F., Kawaoka,Y., Zhong,G.; Neumann,G.
EPI2585005	HA	Vietnam	2015-Oct-25	EPI_ISL_17768792	A/muscovy duck/Vietnam/HN-2504/2015	J. Craig Venter Institute	Import from public-domain	Tan,G., Pickett,B., Fedorova,N., Amedeo,P., Isom,R., Hu,L., Christensen,J., Miller,J., Durbin,A., Williams,T., Arumemi,F., Kawaoka,Y., Zhong,G.; Neumann,G.
EPI2585006	HA	Vietnam	2016-Jan-05	EPI_ISL_17768793	A/muscovy duck/Vietnam/QN-2612/2016	J. Craig Venter Institute	Import from public-domain	Tan,G., Pickett,B., Fedorova,N., Amedeo,P., Isom,R., Hu,L., Christensen,J., Miller,J., Durbin,A., Williams,T., Arumemi,F., Kawaoka,Y., Zhong,G.; Neumann,G.
EPI2585007	HA	Vietnam	2015-Oct-25	EPI_ISL_17768794	A/muscovy duck/Vietnam/HN-2506/2015	J. Craig Venter Institute	Import from public-domain	Tan,G., Pickett,B., Fedorova,N., Amedeo,P., Isom,R., Hu,L., Christensen,J., Miller,J., Durbin,A., Williams,T., Arumemi,F., Kawaoka,Y., Zhong,G.; Neumann,G.
EPI2585008	HA	Vietnam	2016-Jan-05	EPI_ISL_17768795	A/muscovy duck/Vietnam/QN-2616/2016	J. Craig Venter Institute	Import from public-domain	Tan,G., Pickett,B., Fedorova,N., Amedeo,P., Isom,R., Hu,L., Christensen,J., Miller,J., Durbin,A., Williams,T., Arumemi,F., Kawaoka,Y., Zhong,G.; Neumann,G.
EPI2585009	HA	Vietnam	2015-Oct-25	EPI_ISL_17768796	A/muscovy duck/Vietnam/HN-2508/2015	J. Craig Venter Institute	Import from public-domain	Tan,G., Pickett,B., Fedorova,N., Amedeo,P., Isom,R., Hu,L., Christensen,J., Miller,J., Durbin,A., Williams,T., Arumemi,F., Kawaoka,Y., Zhong,G.; Neumann,G.
EPI2585010	HA	Vietnam	2016-Apr-16	EPI_ISL_17768797	A/muscovy duck/Vietnam/QN-2706/2016	J. Craig Venter Institute	Import from public-domain	Tan,G., Pickett,B., Fedorova,N., Amedeo,P., Isom,R., Hu,L., Christensen,J., Miller,J., Durbin,A., Williams,T., Arumemi,F., Kawaoka,Y., Zhong,G.; Neumann,G.
EPI2585012	HA	Vietnam	2015-Dec-08	EPI_ISL_17768799	A/duck/Vietnam/LBM837/2015	Avian Zoonosis Research Center	Import from public-domain	Soda,K., Nguyen,K.H., Trang,H.U., Le,Q.M.; Ito,T.
EPI2585014	HA	Vietnam	2015-Nov-10	EPI_ISL_17768801	A/muscovy duck/Vietnam/LBM809/2015	Avian Zoonosis Research Center	Import from public-domain	Soda,K., Nguyen,K.H., Le,Q.M.; Ito,T.
EPI2585015	HA	Vietnam	2016-Jan-05	EPI_ISL_17768802	A/muscovy duck/Vietnam/QN-2611/2016	J. Craig Venter Institute	Import from public-domain	Tan,G., Pickett,B., Fedorova,N., Amedeo,P., Isom,R., Hu,L., Christensen,J., Miller,J., Durbin,A., Williams,T., Arumemi,F., Kawaoka,Y., Zhong,G.; Neumann,G.
EPI573664	HA	Japan	2015-Jan-03	EPI_ISL_174519	A/crane/Kagoshima/KU53/2015(H5N8)	Kagoshima University	Kagoshima University
EPI573672	HA	Japan	2015-Jan-14	EPI_ISL_174520	A/mallard duck/Kagoshima/KU70/2015(H5N8)	Kagoshima University	Kagoshima University
EPI573680	HA	Japan	2015-Feb-13	EPI_ISL_174521	A/mallard duck/Kagoshima/KU116/2015(H5N8)	Kagoshima University	Kagoshima University
EPI588952	HA	Taiwan	2015-Jan-11	EPI_ISL_179023	A/goose/Taiwan/a015/2015	Animal Health Research Institute	Animal Health Research Institute	Yu-Ju,Lin; Li-Hsuan,Chen; Wan-Chen,Li; Yu-Pin,Liu; Ming-Shiuh,Lee; Ming-Chu,Cheng; Hsiang-Jung,Tsai
EPI588960	HA	Taiwan	2015-Jan-13	EPI_ISL_179024	A/duck/Taiwan/a043/2015	Animal Health Research Institute	Animal Health Research Institute	Yu-Ju,Lin; Li-Hsuan,Chen; Wan-Chen,Li; Yu-Pin,Liu; Ming-Shiuh,Lee; Ming-Chu,Cheng; Hsiang-Jung,Tsai
EPI588968	HA	Taiwan	2015-Jan-16	EPI_ISL_179025	A/chicken/Taiwan/a174/2015	Animal Health Research Institute	Animal Health Research Institute	Yu-Ju,Lin; Li-Hsuan,Chen; Wan-Chen,Li; Yu-Pin,Liu; Ming-Shiuh,Lee; Ming-Chu,Cheng; Hsiang-Jung,Tsai
EPI588976	HA	Taiwan	2015-Jan-13	EPI_ISL_179026	A/duck/Taiwan/a068/2015	Animal Health Research Institute	Animal Health Research Institute	Yu-Ju,Lin; Li-Hsuan,Chen; Wan-Chen,Li; Yu-Pin,Liu; Ming-Shiuh,Lee; Ming-Chu,Cheng; Hsiang-Jung,Tsai
EPI641392	HA	China	2015-Feb-17	EPI_ISL_195308	A/chicken/Yunnan/19/2015		Import from public-domain	Xia,X.; Zhang,Y.; Yang,Z.; Guan,W.; Yuan,B.; Feng,Y.; Wang,Y.; Song,Y.; Li,Z.; Zhong,N.; Li,S.
EPI641394	HA	China	2015-Feb-27	EPI_ISL_195309	A/chicken/Yunnan/22/2015		Import from public-domain	Xia,X.; Zhang,Y.; Yang,Z.; Guan,W.; Yuan,B.; Feng,Y.; Wang,Y.; Song,Y.; Li,Z.; Zhong,N.; Li,S.
EPI641396	HA	China	2015-Feb-17	EPI_ISL_195310	A/chicken/Yunnan/25A/2015		Import from public-domain	Xia,X.; Zhang,Y.; Yang,Z.; Guan,W.; Yuan,B.; Feng,Y.; Wang,Y.; Song,Y.; Li,Z.; Zhong,N.; Li,S.
EPI641432	HA	Indonesia	2015-Apr-17	EPI_ISL_195322	A/chicken/Tangerang/SBO-0069-04/2015		Import from public-domain	Syamsidar,S.; Nurhandayani,A.; Kusumastuti,A.; Ong,S.
EPI656522	HA	China	2015-Apr-01	EPI_ISL_198752	A/chicken/Jiangxi/04.01 NCDZT0010-O/2015(H9N9)		Institute of Microbiology, Chinese Academy of Sciences
EPI656562	HA	China	2015-Apr-04	EPI_ISL_198757	A/goose/Jilin/04.04 SY003-O/2015(H5N6)		Institute of Microbiology, Chinese Academy of Sciences
EPI656570	HA	China	2015-Apr-01	EPI_ISL_198758	A/chicken/Jiangxi/04.01 NCJD131-1-O/2015(H5N6)		Institute of Microbiology, Chinese Academy of Sciences
EPI656898	HA	China	2015-Feb-10	EPI_ISL_198799	A/Pigeon/Jiangxi/02.10 NCDZT0017-P/2015(H5N6)		Institute of Microbiology, Chinese Academy of Sciences
EPI657202	HA	China	2015-Apr-12	EPI_ISL_198837	A/chicken/Jilin/04.12 MHK003-O/2015(H5N1)		Institute of Microbiology, Chinese Academy of Sciences
EPI657226	HA	China	2015-Apr-25	EPI_ISL_198840	A/chicken/Jilin/04.25 MHK009/2015(H5N1)		Institute of Microbiology, Chinese Academy of Sciences
EPI657266	HA	China	2015-Apr-12	EPI_ISL_198845	A/chicken/Jilin/04.12 MHK001-O/2015(H5N1)		Institute of Microbiology, Chinese Academy of Sciences
EPI657274	HA	China	2015-Apr-12	EPI_ISL_198846	A/chicken/Jilin/04.12 MHK002-O/2015(H5N1)		Institute of Microbiology, Chinese Academy of Sciences
EPI657298	HA	China	2015-Apr-25	EPI_ISL_198849	A/pigeon/Jilin/04.25 CCHL018-O/2015(H5N6)		Institute of Microbiology, Chinese Academy of Sciences
EPI657322	HA	China	2015-Apr-01	EPI_ISL_198856	A/chicken/Jiangxi/04.01 NCDZT0040-O/2015(H5N6)		Institute of Microbiology, Chinese Academy of Sciences
EPI657362	HA	China	2015-Apr-14	EPI_ISL_198861	A/chicken/Hunan/04.14 YYKG0533-Z-O/2015(H5N6)		Institute of Microbiology, Chinese Academy of Sciences
EPI657514	HA	China	2015-Mar-16	EPI_ISL_198880	A/chicken/Yunnan/03.16 DQXYL0034-O/2015(H5N6)		Institute of Microbiology, Chinese Academy of Sciences
EPI657522	HA	China	2015-Mar-16	EPI_ISL_198881	A/chicken/Yunnan/03.16 DQJT0048-O/2015(H5N6)		Institute of Microbiology, Chinese Academy of Sciences
EPI657530	HA	China	2015-Mar-16	EPI_ISL_198882	A/duck/Yunnan/03.16 DQXYL0039-O/2015(H5N6)		Institute of Microbiology, Chinese Academy of Sciences
EPI657538	HA	China	2015-Mar-15	EPI_ISL_198883	A/duck/Yunnan/03.15 DQWGH005-O/2015(H5N6)		Institute of Microbiology, Chinese Academy of Sciences
EPI657610	HA	China	2015-Apr-25	EPI_ISL_198892	A/pigeon/Jilin/04.25 CCHL019-O/2015(H5N1)		Institute of Microbiology, Chinese Academy of Sciences
EPI657802	HA	China	2015-May-06	EPI_ISL_198916	A/chicken/Jiangxi/05.06 NCDZT1174-O/2015(H5N6)		Institute of Microbiology, Chinese Academy of Sciences
EPI657810	HA	China	2015-Apr-01	EPI_ISL_198917	A/chicken/Jiangxi/04.01 NCJD0119-O/2015(H5N6)		Institute of Microbiology, Chinese Academy of Sciences
EPI657826	HA	China	2015-Apr-01	EPI_ISL_198919	A/chicken/Jiangxi/04.01 NCJD0010-O/2015(H5N6)		Institute of Microbiology, Chinese Academy of Sciences
EPI657834	HA	China	2015-Apr-01	EPI_ISL_198920	A/chicken/Jiangxi/04.01 NCJD0137-O/2015(H5N6)		Institute of Microbiology, Chinese Academy of Sciences
EPI657842	HA	China	2015-Apr-01	EPI_ISL_198921	A/chicken/Jiangxi/04.01 NCJD0146-O/2015(H5N6)		Institute of Microbiology, Chinese Academy of Sciences
EPI657858	HA	China	2015-Apr-01	EPI_ISL_198923	A/chicken/Jiangxi/04.01 NCDZT0173-P/2015(H5N6)		Institute of Microbiology, Chinese Academy of Sciences
EPI657866	HA	China	2015-Apr-01	EPI_ISL_198924	A/chicken/Jiangxi/04.01 NCDZT0175-P/2015(H5N6)		Institute of Microbiology, Chinese Academy of Sciences
EPI657882	HA	China	2015-Apr-01	EPI_ISL_198926	A/chicken/Jiangxi/04.01 NCDZT0192-P/2015(H5N6)		Institute of Microbiology, Chinese Academy of Sciences
EPI657890	HA	China	2015-Apr-01	EPI_ISL_198927	A/chicken/Jiangxi/04.01 NCDZT0203-P/2015(H5N6)		Institute of Microbiology, Chinese Academy of Sciences
EPI657906	HA	China	2015-Apr-01	EPI_ISL_198929	A/chicken/Jiangxi/04.01 NCDZT0206-P/2015(H5N6)		Institute of Microbiology, Chinese Academy of Sciences
EPI657914	HA	China	2015-Apr-01	EPI_ISL_198930	A/chicken/Jiangxi/04.01 NCDZT0238-P/2015(H5N6)		Institute of Microbiology, Chinese Academy of Sciences
EPI657930	HA	China	2015-Apr-01	EPI_ISL_198932	A/chicken/Jiangxi/04.01 NCDZT0279-P/2015(H5N6)		Institute of Microbiology, Chinese Academy of Sciences
EPI657938	HA	China	2015-Apr-01	EPI_ISL_198933	A/chicken/Jiangxi/04.01 NCDZT0285-P/2015(H5N6)		Institute of Microbiology, Chinese Academy of Sciences
EPI657946	HA	China	2015-Apr-01	EPI_ISL_198934	A/chicken/Jiangxi/04.01 NCDZT0291-P/2015(H5N6)		Institute of Microbiology, Chinese Academy of Sciences
EPI657954	HA	China	2015-Apr-01	EPI_ISL_198935	A/chicken/Jiangxi/04.01 NCDZT0292-P/2015(H5N6)		Institute of Microbiology, Chinese Academy of Sciences
EPI657970	HA	China	2015-Apr-01	EPI_ISL_198937	A/duck/Jiangxi/04.01 NCDZT0312-O/2015(H5N6)		Institute of Microbiology, Chinese Academy of Sciences
EPI657986	HA	China	2015-Apr-01	EPI_ISL_198939	A/duck/Jiangxi/04.01 NCDZT0334-P/2015(H5N6)		Institute of Microbiology, Chinese Academy of Sciences
EPI658111	HA	China	2015-Apr-01	EPI_ISL_198962	A/Pigeon/Jiangxi/04.01 NCDZT0347-O/2015(H5N6)		Institute of Microbiology, Chinese Academy of Sciences
EPI658127	HA	China	2015-Apr-01	EPI_ISL_198964	A/Pigeon/Jiangxi/04.01 NCDZT0348-O/2015(H5N6)		Institute of Microbiology, Chinese Academy of Sciences
EPI658151	HA	China	2015-Apr-01	EPI_ISL_198967	A/Pigeon/Jiangxi/04.01 NCDZT0352-O/2015(H5N6)		Institute of Microbiology, Chinese Academy of Sciences
EPI658159	HA	China	2015-Apr-01	EPI_ISL_198968	A/Pigeon/Jiangxi/04.01 NCDZT0353-O/2015(H5N6)		Institute of Microbiology, Chinese Academy of Sciences
EPI658183	HA	China	2015-May-06	EPI_ISL_198971	A/chicken/Jiangxi/05.06 NCDZT0039B-P/2015(H5N6)		Institute of Microbiology, Chinese Academy of Sciences
EPI658191	HA	China	2015-May-06	EPI_ISL_198972	A/chicken/Jiangxi/05.06 NCDZT0003C-P/2015(H5N6)		Institute of Microbiology, Chinese Academy of Sciences
EPI658223	HA	China	2015-Apr-01	EPI_ISL_198976	A/chicken/Jiangxi/04.01 NCDZT0042-O/2015(H5N6)		Institute of Microbiology, Chinese Academy of Sciences
EPI658231	HA	China	2015-May-06	EPI_ISL_198977	A/chicken/Jiangxi/05.06 NCDZT0043B-P/2015(H5N6)		Institute of Microbiology, Chinese Academy of Sciences
EPI658287	HA	China	2015-May-07	EPI_ISL_198984	A/duck/Jiangxi/05.07 NCJD0056A-P/2015(H5N6)		Institute of Microbiology, Chinese Academy of Sciences
EPI658295	HA	China	2015-May-06	EPI_ISL_198985	A/chicken/Jiangxi/05.06 NCDZT0058B-P/2015(H5N6)		Institute of Microbiology, Chinese Academy of Sciences
EPI658311	HA	China	2015-May-07	EPI_ISL_198987	A/duck/Jiangxi/05.07 NCJD0061A-P/2015(H5N6)		Institute of Microbiology, Chinese Academy of Sciences
EPI658335	HA	China	2015-Apr-01	EPI_ISL_198990	A/chicken/Jiangxi/04.01 NCNP0065-Z-O/2015(H5N6)		Institute of Microbiology, Chinese Academy of Sciences
EPI658343	HA	China	2015-May-07	EPI_ISL_198991	A/duck/Jiangxi/05.07 NCJD0067A-P/2015(H5N6)		Institute of Microbiology, Chinese Academy of Sciences
EPI658503	HA	China	2015-Mar-06	EPI_ISL_199011	A/chicken/Hubei/03.06 WHWTZ0115-O/2015(H5N6)		Institute of Microbiology, Chinese Academy of Sciences
EPI658535	HA	China	2015-Mar-06	EPI_ISL_199015	A/duck/Hubei/03.06 WHWTZ0129-P/2015(H5N6)		Institute of Microbiology, Chinese Academy of Sciences
EPI658551	HA	China	2015-Mar-06	EPI_ISL_199017	A/chicken/Hubei/03.06 WHWTZ0148-O/2015(H5N6)		Institute of Microbiology, Chinese Academy of Sciences
EPI658567	HA	China	2015-Mar-06	EPI_ISL_199019	A/duck/Hubei/03.06 WHWTZ0155-P/2015(H5N1)		Institute of Microbiology, Chinese Academy of Sciences
EPI658623	HA	China	2015-Mar-06	EPI_ISL_199026	A/duck/Hubei/03.06 WHWTZ0123-O/2015(H5N6)		Institute of Microbiology, Chinese Academy of Sciences
EPI658639	HA	China	2015-Mar-06	EPI_ISL_199028	A/duck/Hubei/03.06 WHWTZ0124-O/2015(H5N6)		Institute of Microbiology, Chinese Academy of Sciences
EPI658647	HA	China	2015-Mar-06	EPI_ISL_199029	A/duck/HuBei/03.06 WHWTZ0158-P/2015(H5N6)		Institute of Microbiology, Chinese Academy of Sciences
EPI658655	HA	China	2015-Mar-06	EPI_ISL_199030	A/duck/Hubei/03.06 WHWTZ0125-O/2015(H5N6)		Institute of Microbiology, Chinese Academy of Sciences
EPI658663	HA	China	2015-Mar-06	EPI_ISL_199031	A/duck/Hubei/03.06 WHWTZ0130-O/2015(H5N6)		Institute of Microbiology, Chinese Academy of Sciences
EPI658671	HA	China	2015-Mar-06	EPI_ISL_199032	A/duck/Hubei/03.06 WHWTZ0148-O/2015(H5N6)		Institute of Microbiology, Chinese Academy of Sciences
EPI658687	HA	China	2015-Mar-16	EPI_ISL_199034	A/chicken/Yunnan/03.16 DQJT0068-O/2015(H5N6)		Institute of Microbiology, Chinese Academy of Sciences
EPI658695	HA	China	2015-Mar-15	EPI_ISL_199035	A/chicken/Yunnan/03.15 DQXYL0073-O/2015(H5N6)		Institute of Microbiology, Chinese Academy of Sciences
EPI658703	HA	China	2015-Mar-16	EPI_ISL_199036	A/chicken/Yunnan/03.16 DQJT0066-O/2015(H5N6)		Institute of Microbiology, Chinese Academy of Sciences
EPI658711	HA	China	2015-Mar-16	EPI_ISL_199037	A/duck/Yunnan/03.16 DQXYL0013-O/2015		Institute of Microbiology, Chinese Academy of Sciences
EPI658719	HA	China	2015-Apr-22	EPI_ISL_199038	A/duck/Hunan/04.22 LDDX037-P/2015(H5N6)		Institute of Microbiology, Chinese Academy of Sciences
EPI658743	HA	China	2015-Mar-16	EPI_ISL_199041	A/chicken/Yunnan/03.16 DQXYL023-O/2015(H5N6)		Institute of Microbiology, Chinese Academy of Sciences
EPI658751	HA	China	2015-Mar-16	EPI_ISL_199042	A/duck/Yunnan/03.16 DQXYL003-O/2015(H5N6)		Institute of Microbiology, Chinese Academy of Sciences
EPI658759	HA	China	2015-Mar-16	EPI_ISL_199043	A/duck/Yunnan/03.16 DQXYL017-O/2015(H5N6)		Institute of Microbiology, Chinese Academy of Sciences
EPI658767	HA	China	2015-Mar-16	EPI_ISL_199044	A/duck/Yunnan/03.16 DQXYL022-O/2015(H5N6)		Institute of Microbiology, Chinese Academy of Sciences
EPI658775	HA	China	2015-Feb-07	EPI_ISL_199045	A/duck/Hunan/02.07 YYFQH010-P/2015(H5N6)		Institute of Microbiology, Chinese Academy of Sciences
EPI658783	HA	China	2015-Jan-21	EPI_ISL_199046	A/duck/Hunan/01.21 YYFQH010-O/2015(H5N6)		Institute of Microbiology, Chinese Academy of Sciences
EPI658791	HA	China	2015-Jan-21	EPI_ISL_199047	A/duck/Hunan/01.21 YYFQH011-O/2015(H5N6)		Institute of Microbiology, Chinese Academy of Sciences
EPI658807	HA	China	2015-Feb-07	EPI_ISL_199049	A/duck/Hunan/02.07 YYFQHY12Y-O/2015(H5N6)		Institute of Microbiology, Chinese Academy of Sciences
EPI658815	HA	China	2015-Jan-21	EPI_ISL_199050	A/duck/Hunan/01.21 YYFQH012-O/2015(H5N6)		Institute of Microbiology, Chinese Academy of Sciences
EPI658823	HA	China	2015-Mar-09	EPI_ISL_199051	A/duck/Hunan/03.09 YYFQH0047-O/2015(H5N6)		Institute of Microbiology, Chinese Academy of Sciences
EPI658831	HA	China	2015-Feb-07	EPI_ISL_199052	A/duck/Hunan/02.07 YYFQH015-P/2015(H5N6)		Institute of Microbiology, Chinese Academy of Sciences
EPI658839	HA	China	2015-Jan-21	EPI_ISL_199053	A/duck/Hunan/01.21 YYFQH015-O/2015(H5N6)		Institute of Microbiology, Chinese Academy of Sciences
EPI658847	HA	China	2015-Jan-21	EPI_ISL_199054	A/duck/Hunan/01.21 YYFQH016-O/2015(H5N6)		Institute of Microbiology, Chinese Academy of Sciences
EPI658855	HA	China	2015-Jan-21	EPI_ISL_199055	A/duck/Hunan/01.21 YYFQH018-O/2015(H5N6)		Institute of Microbiology, Chinese Academy of Sciences
EPI658863	HA	China	2015-Jan-21	EPI_ISL_199056	A/duck/Hunan/01.21 YYFQH019-P/2015(H5N6)		Institute of Microbiology, Chinese Academy of Sciences
EPI658871	HA	China	2015-Feb-07	EPI_ISL_199057	A/duck/Hunan/02.07 YYFQHY19Y-O/2015(H5N6)		Institute of Microbiology, Chinese Academy of Sciences
EPI658879	HA	China	2015-Feb-07	EPI_ISL_199058	A/duck/Hunan/02.07 YYFQHY20Y-O/2015(H5N6)		Institute of Microbiology, Chinese Academy of Sciences
EPI658887	HA	China	2015-Jan-21	EPI_ISL_199059	A/duck/Hunan/01.21 YYFQH022-O/2015(H5N6)		Institute of Microbiology, Chinese Academy of Sciences
EPI658895	HA	China	2015-Jan-09	EPI_ISL_199060	A/Phalacrocorax/Hubei/01.09 V1/2015(H5N1)		Institute of Microbiology, Chinese Academy of Sciences
EPI658903	HA	China	2015-Jan-09	EPI_ISL_199061	A/Phalacrocorax/Hubei/01.09 V4/2015(H5N1)		Institute of Microbiology, Chinese Academy of Sciences
EPI658911	HA	China	2015-Jan-09	EPI_ISL_199062	A/Phalacrocorax/Hubei/01.09 V5/2015(H5N6)		Institute of Microbiology, Chinese Academy of Sciences
EPI658919	HA	China	2015-Jan-09	EPI_ISL_199063	A/Phalacrocorax/Hubei/01.09 V7/2015(H5N6)		Institute of Microbiology, Chinese Academy of Sciences
EPI658927	HA	China	2015-Jan-21	EPI_ISL_199064	A/duck/Hunan/01.21 YYFQH023-O/2015(H5N6)		Institute of Microbiology, Chinese Academy of Sciences
EPI658935	HA	China	2015-Jan-21	EPI_ISL_199065	A/duck/Hunan/01.21 YYFQH024-P/2015(H5N6)		Institute of Microbiology, Chinese Academy of Sciences
EPI658943	HA	China	2015-Jan-21	EPI_ISL_199066	A/duck/Hunan/01.21 YYFQH025-P/2015(H5N6)		Institute of Microbiology, Chinese Academy of Sciences
EPI658951	HA	China	2015-Feb-07	EPI_ISL_199067	A/duck/Hunan/02.07 YYFQH026-O/2015(H5N6)		Institute of Microbiology, Chinese Academy of Sciences
EPI658959	HA	China	2015-Jan-21	EPI_ISL_199068	A/duck/Hunan/01.21 YYFQH027-O/2015(H5N6)		Institute of Microbiology, Chinese Academy of Sciences
EPI658967	HA	China	2015-Feb-07	EPI_ISL_199069	A/duck/Hunan/02.07 YYFQH029-O/2015(H5N6)		Institute of Microbiology, Chinese Academy of Sciences
EPI658975	HA	China	2015-Jan-21	EPI_ISL_199070	A/duck/Hunan/01.21 YYFQH030-O/2015(H5N6)		Institute of Microbiology, Chinese Academy of Sciences
EPI658983	HA	China	2015-Jan-21	EPI_ISL_199071	A/duck/Hunan/01.21 YYFQH032-P/2015(H5N6)		Institute of Microbiology, Chinese Academy of Sciences
EPI658991	HA	China	2015-Feb-07	EPI_ISL_199072	A/duck/Hunan/02.07 YYFQH032-O/2015(H5N6)		Institute of Microbiology, Chinese Academy of Sciences
EPI658999	HA	China	2015-Feb-07	EPI_ISL_199073	A/duck/Hunan/02.07 YYFQH003-P/2015(H5N6)		Institute of Microbiology, Chinese Academy of Sciences
EPI659007	HA	China	2015-Jan-21	EPI_ISL_199074	A/duck/Hunan/01.21 YYFQH003-O/2015(H5N6)		Institute of Microbiology, Chinese Academy of Sciences
EPI659015	HA	China	2015-Jan-21	EPI_ISL_199075	A/duck/Hunan/01.21 YYFQH005-P/2015(H5N6)		Institute of Microbiology, Chinese Academy of Sciences
EPI659023	HA	China	2015-Jan-21	EPI_ISL_199076	A/duck/Hunan/01.21 YYFQH005-O/2015(H5N6)		Institute of Microbiology, Chinese Academy of Sciences
EPI659031	HA	China	2015-Feb-07	EPI_ISL_199077	A/duck/Hunan/02.07 YYFQH006-P/2015(H5N6)		Institute of Microbiology, Chinese Academy of Sciences
EPI659047	HA	China	2015-Jan-21	EPI_ISL_199079	A/duck/Hunan/01.21 YYFQH006-O/2015(H5N6)		Institute of Microbiology, Chinese Academy of Sciences
EPI659055	HA	China	2015-Jan-21	EPI_ISL_199080	A/duck/Hunan/01.21 YYFQH007-O/2015(H5N6)		Institute of Microbiology, Chinese Academy of Sciences
EPI659063	HA	China	2015-Apr-14	EPI_ISL_199081	A/chicken/Hunan/04.14 YYXS0835-O/2015(H5N6)		Institute of Microbiology, Chinese Academy of Sciences
EPI659079	HA	China	2015-Jan-21	EPI_ISL_199083	A/duck/Hunan/01.21 YYFQH009-O/2015(H5N6)		Institute of Microbiology, Chinese Academy of Sciences
EPI659095	HA	China	2015-Mar-15	EPI_ISL_199085	A/chicken/Yunnan/03.15 DQJT0054-Z-P/2015(H5N6)		Institute of Microbiology, Chinese Academy of Sciences
EPI659103	HA	China	2015-Mar-16	EPI_ISL_199086	A/chicken/Yunnan/03.16 DQXYL0063-Z-O/2015(H5N6)		Institute of Microbiology, Chinese Academy of Sciences
EPI659159	HA	China	2015-Mar-15	EPI_ISL_199093	A/duck/Yunnan/03.15 DQXYL007-Z-O/2015(H5N6)		Institute of Microbiology, Chinese Academy of Sciences
EPI659215	HA	China	2015-Mar-17	EPI_ISL_199100	A/chicken/Yunnan/03.17 DQJT0041-O/2015(H5N6)		Institute of Microbiology, Chinese Academy of Sciences
EPI659223	HA	China	2015-Mar-17	EPI_ISL_199101	A/chicken/Yunnan/03.16 DQXYL0044-O/2015(N6)		Institute of Microbiology, Chinese Academy of Sciences
EPI659231	HA	China	2015-Mar-16	EPI_ISL_199102	A/chicken/Yunnan/03.16 DQXYL0050-O/2015(H5N6)		Institute of Microbiology, Chinese Academy of Sciences
EPI659247	HA	China	2015-Mar-16	EPI_ISL_199104	A/chicken/Yunnan/03.16 DQXYL0052-O/2015(H5N6)		Institute of Microbiology, Chinese Academy of Sciences
EPI659263	HA	China	2015-Mar-16	EPI_ISL_199106	A/chicken/Yunnan/03.16 DQXYL057-O/2015(H5N6)		Institute of Microbiology, Chinese Academy of Sciences
EPI659287	HA	China	2015-Mar-16	EPI_ISL_199109	A/chicken/Yunnan/03.16 DQJT069-O/2015(H5N6)		Institute of Microbiology, Chinese Academy of Sciences
EPI659295	HA	China	2015-Mar-09	EPI_ISL_199110	A/Anser fabalis/Hunan/03.09 YYDTH0007/2015(H5N6)		Institute of Microbiology, Chinese Academy of Sciences
EPI659367	HA	China	2015-Apr-14	EPI_ISL_199119	A/duck/Hunan/04.14 YYGK460-O/2015(H5N6)		Institute of Microbiology, Chinese Academy of Sciences
EPI659375	HA	China	2015-Apr-14	EPI_ISL_199120	A/duck/Hunan/04.14 YYGK464-O/2015(H5N6)		Institute of Microbiology, Chinese Academy of Sciences
EPI659391	HA	China	2015-Apr-14	EPI_ISL_199122	A/duck/Hunan/04.14 YYGK468-O/2015(H5N6)		Institute of Microbiology, Chinese Academy of Sciences
EPI659455	HA	China	2015-Apr-14	EPI_ISL_199130	A/chicken/Hunan/04.14 YYGK607-P/2015(H5N6)		Institute of Microbiology, Chinese Academy of Sciences
EPI659511	HA	China	2015-Apr-14	EPI_ISL_199137	A/duck/Hunan/04.14 YYXS877-P/2015(H5N6)		Institute of Microbiology, Chinese Academy of Sciences
EPI659519	HA	China	2015-Apr-14	EPI_ISL_199138	A/duck/Hunan/04.14 YYGK0878-P/2015(H5N6)		Institute of Microbiology, Chinese Academy of Sciences
EPI662632	HA	Japan	2015-Jan-15	EPI_ISL_199148	A/chicken/Okayama/1-2/2015	National Institute of Animal Health	National Institute of Animal Health
EPI662624	HA	Japan	2015-Jan-17	EPI_ISL_199149	A/chicken/Saga/1-1/2015	National Institute of Animal Health	National Institute of Animal Health
EPI659631	HA	China	2015-Jan-01	EPI_ISL_199160	A/goose/Shandong/01.01 JY-GS/2015(H5N2)		Institute of Microbiology, Chinese Academy of Sciences
EPI659639	HA	China	2015-Jan-07	EPI_ISL_199161	A/goose/Shandong/01.07 JQ-GS/2015(H5N2)		Institute of Microbiology, Chinese Academy of Sciences
EPI659655	HA	China	2015-Feb-16	EPI_ISL_199163	A/goose/Shandong/02.16 YG-GS/2015(H5N6)		Institute of Microbiology, Chinese Academy of Sciences
EPI659663	HA	China	2015-Mar-17	EPI_ISL_199164	A/chicken/Jiangsu/03.17 WX006-P/2015(H5N1)		Institute of Microbiology, Chinese Academy of Sciences
EPI659743	HA	China	2015-Mar-26	EPI_ISL_199174	A/duck/Guangdong/03.26 DGCPLB021-O/2015(H5N6)		Institute of Microbiology, Chinese Academy of Sciences
EPI659751	HA	China	2015-Mar-26	EPI_ISL_199175	A/duck/Guangdong/03.26 DGCP066-O/2015(H5N6)		Institute of Microbiology, Chinese Academy of Sciences
EPI659775	HA	China	2015-Mar-26	EPI_ISL_199178	A/duck/Guangdong/03.26 DGCP074-O/2015(H5N6)		Institute of Microbiology, Chinese Academy of Sciences
EPI659783	HA	China	2015-Mar-26	EPI_ISL_199179	A/duck/Guangdong/03.26 DGCP079-O/2015(H5N6)		Institute of Microbiology, Chinese Academy of Sciences
EPI659791	HA	China	2015-Mar-26	EPI_ISL_199180	A/duck/Guangdong/03.26 DGCP080-O/2015(H5N6)		Institute of Microbiology, Chinese Academy of Sciences
EPI659799	HA	China	2015-Mar-26	EPI_ISL_199181	A/duck/Guangdong/03.26 DGCP076-O/2015(H5N6)		Institute of Microbiology, Chinese Academy of Sciences
EPI659815	HA	China	2015-Mar-26	EPI_ISL_199183	A/duck/Guangdong/03.26 DGCPLB020-P/2015(H5N6)		Institute of Microbiology, Chinese Academy of Sciences
EPI659831	HA	China	2015-Mar-26	EPI_ISL_199185	A/duck/Guangdong/03.26 DGCP709-P/2015(H5N6)		Institute of Microbiology, Chinese Academy of Sciences
EPI659839	HA	China	2015-Mar-26	EPI_ISL_199186	A/duck/Guangdong/03.26 DGCPLB022-P/2015(H5N6)		Institute of Microbiology, Chinese Academy of Sciences
EPI659847	HA	China	2015-Mar-26	EPI_ISL_199187	A/duck/Guangdong/03.26 DGCPLB023-P/2015(H5N6)		Institute of Microbiology, Chinese Academy of Sciences
EPI659855	HA	China	2015-Mar-26	EPI_ISL_199188	A/duck/Guangdong/03.26 DGCPLB019-P/2015(H5N6)		Institute of Microbiology, Chinese Academy of Sciences
EPI659863	HA	China	2015-Mar-26	EPI_ISL_199189	A/duck/Guangdong/03.26 DGCP078-P/2015(H5N6)		Institute of Microbiology, Chinese Academy of Sciences
EPI659871	HA	China	2015-Mar-26	EPI_ISL_199190	A/duck/Guangdong/03.26 DGCPLB009-O/2015(H5N6)		Institute of Microbiology, Chinese Academy of Sciences
EPI659887	HA	China	2015-Mar-26	EPI_ISL_199192	A/duck/Guangdong/03.26 DGCPLB007-P/2015(H5N6)		Institute of Microbiology, Chinese Academy of Sciences
EPI659911	HA	China	2015-Mar-26	EPI_ISL_199195	A/duck/Guangdong/03.26 DGCP080-P/2015(H5N6)		Institute of Microbiology, Chinese Academy of Sciences
EPI659919	HA	China	2015-Apr-22	EPI_ISL_199196	A/goose/Shandong/04.22 GT/2015(H5N2)		Institute of Microbiology, Chinese Academy of Sciences
EPI659935	HA	China	2015-Mar-26	EPI_ISL_199198	A/duck/Guangdong/03.26 DGCP081-P/2015(H5N6)		Institute of Microbiology, Chinese Academy of Sciences
EPI659943	HA	China	2015-Mar-26	EPI_ISL_199199	A/duck/Guangdong/03.26 DGCP078-O/2015(H5N6)		Institute of Microbiology, Chinese Academy of Sciences
EPI659951	HA	China	2015-Mar-26	EPI_ISL_199200	A/duck/Guangdong/03.26 DGCP084-P/2015(H5N6)		Institute of Microbiology, Chinese Academy of Sciences
EPI659959	HA	China	2015-Mar-26	EPI_ISL_199201	A/duck/Guangdong/03.26 DGCP061-P/2015(H5N6)		Institute of Microbiology, Chinese Academy of Sciences
EPI660007	HA	China	2015-Apr-22	EPI_ISL_199207	A/goose/Guangdong/04.22 DGCP117-O/2015(H5N6)		Institute of Microbiology, Chinese Academy of Sciences
EPI660015	HA	China	2015-Apr-23	EPI_ISL_199208	A/duck/Guangdong/04.23 DGQTXC229-O/2015(H5N6)		Institute of Microbiology, Chinese Academy of Sciences
EPI660023	HA	China	2015-Apr-22	EPI_ISL_199209	A/duck/Guangdong/04.22 DGCP068-O/2015(H5N6)		Institute of Microbiology, Chinese Academy of Sciences
EPI660039	HA	China	2015-Apr-23	EPI_ISL_199211	A/duck/Guangdong/04.23 DGQTSJ150-O/2015(H5N6)		Institute of Microbiology, Chinese Academy of Sciences
EPI660063	HA	China	2015-Apr-23	EPI_ISL_199214	A/duck/Guangdong/04.23 DGQTXC202-O/2015(H5N6)		Institute of Microbiology, Chinese Academy of Sciences
EPI660071	HA	China	2015-Apr-22	EPI_ISL_199215	A/duck/Guangdong/04.22 DGCP069-O/2015(H5N6)		Institute of Microbiology, Chinese Academy of Sciences
EPI660111	HA	China	2015-Apr-22	EPI_ISL_199220	A/goose/Guangdong/04.22 DGCP106-O/2015(Mixed)		Institute of Microbiology, Chinese Academy of Sciences
EPI660127	HA	China	2015-Apr-23	EPI_ISL_199222	A/duck/Guangdong/04.23 DGQTXC203-O/2015(H5N6)		Institute of Microbiology, Chinese Academy of Sciences
EPI660191	HA	China	2015-Apr-22	EPI_ISL_199230	A/duck/Guangdong/04.22 DGCPLB018-O/2015(H5N6)		Institute of Microbiology, Chinese Academy of Sciences
EPI660207	HA	China	2015-Apr-22	EPI_ISL_199232	A/duck/Guangdong/04.22 DGCPLB022-O/2015(Mixed)		Institute of Microbiology, Chinese Academy of Sciences
EPI660223	HA	China	2015-Apr-23	EPI_ISL_199234	A/duck/Guangdong/04.23 DGQTXC229-P/2015(H5N6)		Institute of Microbiology, Chinese Academy of Sciences
EPI660231	HA	China	2015-Apr-23	EPI_ISL_199235	A/duck/Guangdong/04.23 DGQTSJ145-O/2015(H5N6)		Institute of Microbiology, Chinese Academy of Sciences
EPI660239	HA	China	2015-Apr-23	EPI_ISL_199236	A/duck/Guangdong/04.23 DGQTXC231-O/2015(H5N6)		Institute of Microbiology, Chinese Academy of Sciences
EPI660279	HA	China	2015-Apr-23	EPI_ISL_199241	A/duck/Guangdong/04.23 DGQTXC226-O/2015(H5N6)		Institute of Microbiology, Chinese Academy of Sciences
EPI660287	HA	China	2015-Apr-22	EPI_ISL_199242	A/duck/Guangdong/04.22 DGCP061-O/2015(H5N6)		Institute of Microbiology, Chinese Academy of Sciences
EPI660303	HA	China	2015-Apr-22	EPI_ISL_199244	A/goose/Guangdong/04.22 DGCP120-P/2015(H5N6)		Institute of Microbiology, Chinese Academy of Sciences
EPI660351	HA	China	2015-Apr-22	EPI_ISL_199250	A/duck/Guangdong/04.22 DGCP079-O/2015(H5N6)		Institute of Microbiology, Chinese Academy of Sciences
EPI660367	HA	China	2015-Apr-22	EPI_ISL_199252	A/duck/Guangdong/04.22 DGCPLB020-O/2015(H5N6)		Institute of Microbiology, Chinese Academy of Sciences
EPI660391	HA	China	2015-Apr-22	EPI_ISL_199255	A/duck/Guangdong/04.22 DGCP071-O/2015(H5N6)		Institute of Microbiology, Chinese Academy of Sciences
EPI660423	HA	China	2015-Apr-22	EPI_ISL_199259	A/duck/Guangdong/04.22 DGCP062-O/2015(H5N6)		Institute of Microbiology, Chinese Academy of Sciences
EPI660431	HA	China	2015-Apr-22	EPI_ISL_199260	A/goose/Guangdong/04.22 DGCPLB045-O/2015(H5N6)		Institute of Microbiology, Chinese Academy of Sciences
EPI660447	HA	China	2015-Apr-23	EPI_ISL_199262	A/duck/Guangdong/04.23 DGQTXC228-O/2015(H5N6)		Institute of Microbiology, Chinese Academy of Sciences
EPI660455	HA	China	2015-Apr-22	EPI_ISL_199263	A/goose/Guangdong/04.22 DGCP116-P/2015(Mixed)		Institute of Microbiology, Chinese Academy of Sciences
EPI660463	HA	China	2015-Apr-23	EPI_ISL_199264	A/duck/Guangdong/04.23 DGQTXC227-O/2015(Mixed)		Institute of Microbiology, Chinese Academy of Sciences
EPI660495	HA	China	2015-Apr-22	EPI_ISL_199268	A/goose/Guangdong/04.22 DGCP118-P/2015(H5N6)		Institute of Microbiology, Chinese Academy of Sciences
EPI660503	HA	China	2015-Apr-23	EPI_ISL_199269	A/goose/Guangdong/04.23 DGQTXC216-P/2015(H5N6)		Institute of Microbiology, Chinese Academy of Sciences
EPI660519	HA	China	2015-Apr-23	EPI_ISL_199271	A/duck/Guangdong/04.23 DGQTXC202-P/2015(H5N6)		Institute of Microbiology, Chinese Academy of Sciences
EPI660591	HA	China	2015-Apr-22	EPI_ISL_199280	A/duck/Guangdong/04.22 DGCP067-O/2015(H5N6)		Institute of Microbiology, Chinese Academy of Sciences
EPI660599	HA	China	2015-Apr-22	EPI_ISL_199281	A/duck/Guangdong/04.22 DGCP080-O/2015(H5N6)		Institute of Microbiology, Chinese Academy of Sciences
EPI660663	HA	China	2015-Apr-23	EPI_ISL_199289	A/duck/Guangdong/04.23 DGQTXC213-P/2015(H5N6)		Institute of Microbiology, Chinese Academy of Sciences
EPI660671	HA	China	2015-Apr-23	EPI_ISL_199290	A/duck/Guangdong/04.23 DGQTXC236-P/2015(H5N6)		Institute of Microbiology, Chinese Academy of Sciences
EPI660679	HA	China	2015-Apr-23	EPI_ISL_199291	A/duck/Guangdong/04.23 DGQTXC213-O/2015(H5N6)		Institute of Microbiology, Chinese Academy of Sciences
EPI660687	HA	China	2015-Apr-23	EPI_ISL_199292	A/duck/Guangdong/04.23 DGQTXC232-P/2015(H5N6)		Institute of Microbiology, Chinese Academy of Sciences
EPI660695	HA	China	2015-Apr-23	EPI_ISL_199293	A/duck/Guangdong/04.23 DGQTSJ131-O/2015(H5N6)		Institute of Microbiology, Chinese Academy of Sciences
EPI660703	HA	China	2015-Apr-23	EPI_ISL_199294	A/goose/Guangdong/04.23 DGQTXC236-O/2015(H5N6)		Institute of Microbiology, Chinese Academy of Sciences
EPI660711	HA	China	2015-Apr-23	EPI_ISL_199295	A/duck/Guangdong/04.23 DGQTXC228-P/2015(H5N6)		Institute of Microbiology, Chinese Academy of Sciences
EPI660719	HA	China	2015-Apr-23	EPI_ISL_199296	A/pigeon/Guangdong/04.23 DGQTXC197-O/2015(H5N6)		Institute of Microbiology, Chinese Academy of Sciences
EPI660727	HA	China	2015-Apr-23	EPI_ISL_199297	A/duck/Guangdong/04.23 DGQTXC235-O/2015(H5N6)		Institute of Microbiology, Chinese Academy of Sciences
EPI660743	HA	China	2015-Apr-22	EPI_ISL_199299	A/duck/Guangdong/04.22 DGCP081-O/2015(H5N6)		Institute of Microbiology, Chinese Academy of Sciences
EPI660759	HA	China	2015-Apr-23	EPI_ISL_199301	A/goose/Guangdong/04.23 DGQTXC237-O1/2015(H5N6)		Institute of Microbiology, Chinese Academy of Sciences
EPI660767	HA	China	2015-Apr-23	EPI_ISL_199302	A/duck/Guangdong/04.23 DGQTSJ130-O/2015(H5N6)		Institute of Microbiology, Chinese Academy of Sciences
EPI660775	HA	China	2015-Apr-22	EPI_ISL_199303	A/duck/Guangdong/04.22 DGCP084-O/2015(H5N6)		Institute of Microbiology, Chinese Academy of Sciences
EPI660783	HA	China	2015-Apr-22	EPI_ISL_199304	A/duck/Guangdong/04.22 DGCPLB041-P/2015(H5N6)		Institute of Microbiology, Chinese Academy of Sciences
EPI660791	HA	China	2015-Apr-22	EPI_ISL_199305	A/duck/Guangdong/04.22 DGCPLB044-P/2015(H5N6)		Institute of Microbiology, Chinese Academy of Sciences
EPI660975	HA	China	2015-Feb-05	EPI_ISL_199328	A/duck/Jiangxi/02.05 YGYXG015-P/2015(H6N6)		Institute of Microbiology, Chinese Academy of Sciences
EPI661047	HA	China	2015-Jan-14	EPI_ISL_199337	A/duck/Jiangxi/01.14 NCJD054-P/2015(H5N6)		Institute of Microbiology, Chinese Academy of Sciences
EPI661071	HA	China	2015-Jan-14	EPI_ISL_199340	A/duck/Jiangxi/01.14 NCJD064-P/2015(Mixed)		Institute of Microbiology, Chinese Academy of Sciences
EPI661087	HA	China	2015-Jan-14	EPI_ISL_199342	A/chicken/Jiangxi/01.14 NCJD181-P/2015(H5N6)		Institute of Microbiology, Chinese Academy of Sciences
EPI661127	HA	China	2015-Apr-23	EPI_ISL_199347	A/duck/Guangdong/04.23 DGQTXC230-O/2015(H5N6)		Institute of Microbiology, Chinese Academy of Sciences
EPI661175	HA	China	2015-Apr-23	EPI_ISL_199353	A/duck/Guangdong/04.23 DGQTXC207-P/2015(Mixed)		Institute of Microbiology, Chinese Academy of Sciences
EPI661183	HA	China	2015-Apr-23	EPI_ISL_199354	A/duck/Guangdong/04.23 DGQTXC207-O/2015(Mixed)		Institute of Microbiology, Chinese Academy of Sciences
EPI661191	HA	China	2015-Apr-23	EPI_ISL_199355	A/duck/Guangdong/04.23 DGQTXC202-O/2015(Mixed)		Institute of Microbiology, Chinese Academy of Sciences
EPI661199	HA	China	2015-Apr-23	EPI_ISL_199356	A/duck/Guangdong/04.23 DGQTXC205-O/2015(Mixed)		Institute of Microbiology, Chinese Academy of Sciences
EPI661207	HA	China	2015-Apr-23	EPI_ISL_199357	A/duck/Guangdong/04.23 DGQTSJ137-O/2015(Mixed)		Institute of Microbiology, Chinese Academy of Sciences
EPI661215	HA	China	2015-Apr-23	EPI_ISL_199358	A/duck/Guangdong/04.23 DGQTXC186-O/2015(Mixed)		Institute of Microbiology, Chinese Academy of Sciences
EPI661223	HA	China	2015-Mar-27	EPI_ISL_199359	A/duck/Guangdong/03.27 DGQTXC210-O/2015(Mixed)		Institute of Microbiology, Chinese Academy of Sciences
EPI661231	HA	China	2015-Apr-23	EPI_ISL_199360	A/duck/Guangdong/04.23 DGQTXC187-O/2015(Mixed)		Institute of Microbiology, Chinese Academy of Sciences
EPI661239	HA	China	2015-Apr-23	EPI_ISL_199361	A/duck/Guangdong/04.23 DGQTSJ136-O/2015(Mixed)		Institute of Microbiology, Chinese Academy of Sciences
EPI661247	HA	China	2015-Apr-23	EPI_ISL_199362	A/duck/Guangdong/04.23 DGQTSJ146-O/2015(Mixed)		Institute of Microbiology, Chinese Academy of Sciences
EPI661255	HA	China	2015-Apr-23	EPI_ISL_199363	A/duck/Guangdong/04.23 DGQTXC204-P/2015(Mixed)		Institute of Microbiology, Chinese Academy of Sciences
EPI661263	HA	China	2015-Apr-23	EPI_ISL_199364	A/duck/Guangdong/04.23 DGQTXC206-O/2015(Mixed)		Institute of Microbiology, Chinese Academy of Sciences
EPI661271	HA	China	2015-Apr-23	EPI_ISL_199365	A/duck/Guangdong/04.23 DGQTSJ123-O/2015(Mixed)		Institute of Microbiology, Chinese Academy of Sciences
EPI661279	HA	China	2015-Apr-23	EPI_ISL_199366	A/duck/Guangdong/04.23 DGQTSJ134-O/2015(Mixed)		Institute of Microbiology, Chinese Academy of Sciences
EPI661287	HA	China	2015-Mar-27	EPI_ISL_199367	A/duck/Guangdong/03.27 DGQTSJ131-O/2015(Mixed)		Institute of Microbiology, Chinese Academy of Sciences
EPI661295	HA	China	2015-Apr-23	EPI_ISL_199368	A/duck/Guangdong/04.23 DGQTSJ128-O/2015(Mixed)		Institute of Microbiology, Chinese Academy of Sciences
EPI661303	HA	China	2015-Apr-23	EPI_ISL_199369	A/duck/Guangdong/04.23 DGQTXC183-O/2015(Mixed)		Institute of Microbiology, Chinese Academy of Sciences
EPI661311	HA	China	2015-Apr-23	EPI_ISL_199370	A/duck/Guangdong/04.23 DGQTXC204-O/2015(Mixed)		Institute of Microbiology, Chinese Academy of Sciences
EPI661319	HA	China	2015-Apr-23	EPI_ISL_199371	A/duck/Guangdong/04.23 DGQTSJ135-P/2015(Mixed)		Institute of Microbiology, Chinese Academy of Sciences
EPI661327	HA	China	2015-Apr-23	EPI_ISL_199372	A/duck/Guangdong/04.23 DGQTSJ135-O/2015(Mixed)		Institute of Microbiology, Chinese Academy of Sciences
EPI661335	HA	China	2015-Apr-23	EPI_ISL_199373	A/duck/Guangdong/04.23 DGQTSJ138-P/2015(Mixed)		Institute of Microbiology, Chinese Academy of Sciences
EPI661343	HA	China	2015-Mar-27	EPI_ISL_199374	A/duck/Guangdong/03.27 DGQTXC203-O/2015(Mixed)		Institute of Microbiology, Chinese Academy of Sciences
EPI661351	HA	China	2015-Apr-23	EPI_ISL_199375	A/duck/Guangdong/04.23 DGQTSJ138-O/2015(Mixed)		Institute of Microbiology, Chinese Academy of Sciences
EPI661359	HA	China	2015-Apr-23	EPI_ISL_199376	A/duck/Guangdong/04.23 DGQTXC187-P/2015(Mixed)		Institute of Microbiology, Chinese Academy of Sciences
EPI661367	HA	China	2015-Mar-27	EPI_ISL_199377	A/duck/Guangdong/03.27 DGQTXC190-P/2015(Mixed)		Institute of Microbiology, Chinese Academy of Sciences
EPI661375	HA	China	2015-Apr-23	EPI_ISL_199378	A/duck/Guangdong/04.23 DGQTXC201-O/2015(Mixed)		Institute of Microbiology, Chinese Academy of Sciences
EPI661383	HA	China	2015-Apr-23	EPI_ISL_199379	A/duck/Guangdong/04.23 DGQTXC188-P/2015(Mixed)		Institute of Microbiology, Chinese Academy of Sciences
EPI661391	HA	China	2015-Apr-23	EPI_ISL_199380	A/duck/Guangdong/04.23 DGQTXC235-P/2015(H5N6)		Institute of Microbiology, Chinese Academy of Sciences
EPI661399	HA	China	2015-Apr-16	EPI_ISL_199381	A/duck/Guangdong/04.16 LGDBL001/2015(Mixed)		Institute of Microbiology, Chinese Academy of Sciences
EPI661407	HA	China	2015-Apr-16	EPI_ISL_199382	A/duck/Guangdong/04.16 LGDBL007/2015(Mixed)		Institute of Microbiology, Chinese Academy of Sciences
EPI661415	HA	China	2015-Apr-16	EPI_ISL_199383	A/duck/Guangdong/04.16 LGDBL004/2015(Mixed)		Institute of Microbiology, Chinese Academy of Sciences
EPI661431	HA	China	2015-Apr-16	EPI_ISL_199385	A/chicken/Guangdong/04.16 LGWL013/2015(Mixed)		Institute of Microbiology, Chinese Academy of Sciences
EPI661479	HA	China	2015-Mar-27	EPI_ISL_199391	A/duck/Guangdong/03.27 DGQTSJ129-O/2015(Mixed)		Institute of Microbiology, Chinese Academy of Sciences
EPI661527	HA	China	2015-Jan-14	EPI_ISL_199397	A/chicken/Jiangxi/01.14 NCJD125-P/2015(H5N6)		Institute of Microbiology, Chinese Academy of Sciences
EPI661535	HA	China	2015-Feb-06	EPI_ISL_199398	A/duck/Jiangxi/02.06 NCJD039-P/2015(H5N6)		Institute of Microbiology, Chinese Academy of Sciences
EPI661543	HA	China	2015-Feb-06	EPI_ISL_199399	A/duck/Jiangxi/02.06 NCJD036-P/2015(H5N6)		Institute of Microbiology, Chinese Academy of Sciences
EPI661551	HA	China	2015-Feb-05	EPI_ISL_199400	A/chicken/Jiangxi/02.05 YGYXG035-P/2015(H5N6)		Institute of Microbiology, Chinese Academy of Sciences
EPI661559	HA	China	2015-Feb-05	EPI_ISL_199401	A/chicken/Jiangxi/02.05 YGYXG023-P/2015(H5N6)		Institute of Microbiology, Chinese Academy of Sciences
EPI661567	HA	China	2015-Feb-05	EPI_ISL_199402	A/duck/Jiangxi/02.05 YGYXG038-P/2015(H5N6)		Institute of Microbiology, Chinese Academy of Sciences
EPI661575	HA	China	2015-Mar-26	EPI_ISL_199403	A/duck/Guangdong/03.26 DGCP062-P/2015(H5N6)		Institute of Microbiology, Chinese Academy of Sciences
EPI661583	HA	China	2015-Mar-26	EPI_ISL_199404	A/duck/Guangdong/03.26 DGCPLB007-O/2015(H5N6)		Institute of Microbiology, Chinese Academy of Sciences
EPI661591	HA	China	2015-Mar-26	EPI_ISL_199405	A/duck/Guangdong/03.26 DGCPLB022-O/2015(H5N6)		Institute of Microbiology, Chinese Academy of Sciences
EPI661599	HA	China	2015-Mar-26	EPI_ISL_199406	A/duck/Guangdong/03.26 DGCP076-P/2015(H5N6)		Institute of Microbiology, Chinese Academy of Sciences
EPI661607	HA	China	2015-Mar-26	EPI_ISL_199407	A/duck/Guangdong/03.26 DGCP077-O/2015(H5N6)		Institute of Microbiology, Chinese Academy of Sciences
EPI661615	HA	China	2015-Mar-26	EPI_ISL_199408	A/duck/Guangdong/03.26 DGCP075-O/2015(Mixed)		Institute of Microbiology, Chinese Academy of Sciences
EPI661623	HA	China	2015-Mar-26	EPI_ISL_199409	A/duck/Guangdong/03.26 DGCP082-O/2015(H5N6)		Institute of Microbiology, Chinese Academy of Sciences
EPI661639	HA	China	2015-Mar-10	EPI_ISL_199411	A/goose/Shandong/03.10 HZ/2015(H5N1)		Institute of Microbiology, Chinese Academy of Sciences
EPI661663	HA	China	2015-Feb-26	EPI_ISL_199414	A/goose/Shandong/02.26 GD/2015(H5N6)		Institute of Microbiology, Chinese Academy of Sciences
EPI661671	HA	China	2015-Mar-26	EPI_ISL_199415	A/duck/Guangdong/03.26 DGCPLB023-O/2015(H5N6)		Institute of Microbiology, Chinese Academy of Sciences
EPI661679	HA	China	2015-Mar-26	EPI_ISL_199416	A/duck/Guangdong/03.26 DGCPLB024-O/2015(H5N6)		Institute of Microbiology, Chinese Academy of Sciences
EPI661687	HA	China	2015-Mar-26	EPI_ISL_199417	A/duck/Guangdong/03.26 DGCP062-O/2015(H5N6)		Institute of Microbiology, Chinese Academy of Sciences
EPI661703	HA	China	2015-Apr-10	EPI_ISL_199419	A/duck/Guangxi/04.10 JX046/2015(H5N6)		Institute of Microbiology, Chinese Academy of Sciences
EPI661719	HA	China	2015-Feb-11	EPI_ISL_199421	A/duck/Guangdong/02.11 DGCP102-P/2015(Mixed)		Institute of Microbiology, Chinese Academy of Sciences
EPI661727	HA	China	2015-Feb-11	EPI_ISL_199422	A/duck/Guangdong/02.11 DGCP103-P/2015(Mixed)		Institute of Microbiology, Chinese Academy of Sciences
EPI661735	HA	China	2015-Feb-11	EPI_ISL_199423	A/duck/Guangdong/02.11 DGCP104-P/2015(Mixed)		Institute of Microbiology, Chinese Academy of Sciences
EPI661831	HA	China	2015-Feb-11	EPI_ISL_199435	A/duck/Guangdong/02.11 DGCP092-P/2015(Mixed)		Institute of Microbiology, Chinese Academy of Sciences
EPI661839	HA	China	2015-Feb-11	EPI_ISL_199436	A/duck/Guangdong/02.11 DGCP093-P/2015(Mixed)		Institute of Microbiology, Chinese Academy of Sciences
EPI661847	HA	China	2015-Feb-11	EPI_ISL_199437	A/duck/Guangdong/02.11 DGCP094-P/2015(Mixed)		Institute of Microbiology, Chinese Academy of Sciences
EPI661903	HA	China	2015-Apr-10	EPI_ISL_199444	A/chicken/Guangxi/04.10 NM140/2015(H5N6)		Institute of Microbiology, Chinese Academy of Sciences
EPI661919	HA	China	2015-Apr-15	EPI_ISL_199446	A/chicken/Guangdong/04.15 SZBAXQ019/2015(H5N6)		Institute of Microbiology, Chinese Academy of Sciences
EPI661943	HA	China	2015-Apr-15	EPI_ISL_199449	A/duck/Guangdong/04.15 SZBAXQ011/2015(H5N6)		Institute of Microbiology, Chinese Academy of Sciences
EPI661951	HA	China	2015-Apr-15	EPI_ISL_199450	A/duck/Guangdong/04.15 SZBAXQ017/2015(H5N6)		Institute of Microbiology, Chinese Academy of Sciences
EPI661959	HA	China	2015-Apr-15	EPI_ISL_199451	A/duck/Guangdong/04.15 SZBAXQ020/2015(H5N6)		Institute of Microbiology, Chinese Academy of Sciences
EPI661967	HA	China	2015-Apr-15	EPI_ISL_199452	A/duck/Guangdong/04.15 SZBAXQ021/2015(H5N6)		Institute of Microbiology, Chinese Academy of Sciences
EPI661975	HA	China	2015-Apr-15	EPI_ISL_199453	A/duck/Guangdong/04.15 SZBAXQ003/2015(H5N6)		Institute of Microbiology, Chinese Academy of Sciences
EPI661999	HA	China	2015-Apr-15	EPI_ISL_199456	A/pigeon/Guangdong/04.15 SZBAXQ004/2015(H5N6)		Institute of Microbiology, Chinese Academy of Sciences
EPI662015	HA	China	2015-Apr-16	EPI_ISL_199458	A/duck/Guangdong/04.16 SZLGDBL013/2015(H5N6)		Institute of Microbiology, Chinese Academy of Sciences
EPI662023	HA	China	2015-Apr-16	EPI_ISL_199459	A/duck/Guangdong/04.16 SZLGDBL002/2015(H5N6)		Institute of Microbiology, Chinese Academy of Sciences
EPI662031	HA	China	2015-Apr-16	EPI_ISL_199460	A/duck/Guangdong/04.16 SZLGDBL003/2015(H5N6)		Institute of Microbiology, Chinese Academy of Sciences
EPI662039	HA	China	2015-Apr-16	EPI_ISL_199461	A/duck/Guangdong/04.16 SZLGDBL005/2015(H5N6)		Institute of Microbiology, Chinese Academy of Sciences
EPI662047	HA	China	2015-Apr-16	EPI_ISL_199462	A/duck/Guangdong/04.16 SZLGDBL009/2015(H5N6)		Institute of Microbiology, Chinese Academy of Sciences
EPI662055	HA	China	2015-Apr-16	EPI_ISL_199463	A/duck/Guangdong/04.16 SZLGWL002/2015(H5N6)		Institute of Microbiology, Chinese Academy of Sciences
EPI662071	HA	China	2015-Apr-16	EPI_ISL_199465	A/pigeon/Guangdong/04.16 SZLGWL006/2015(H5N6)		Institute of Microbiology, Chinese Academy of Sciences
EPI750098	HA	Taiwan	2015-Jan-12	EPI_ISL_219872	A/goose/Taiwan/01038/2015		Import from public-domain	Lee,M.S.; Chen,L.H.; Chen,Y.P.; Liu,Y.P.; Li,W.C.; Lin,Y.L.; Lee,F.; Ting,L.J.
EPI750106	HA	Taiwan	2015-Jan-16	EPI_ISL_219873	A/chicken/Taiwan/01174/2015		Import from public-domain	Lee,M.S.; Chen,L.H.; Chen,Y.P.; Liu,Y.P.; Li,W.C.; Lin,Y.L.; Lee,F.; Ting,L.J.
EPI750114	HA	Taiwan	2015-Feb-08	EPI_ISL_219874	A/duck/Taiwan/A3400/2015		Import from public-domain	Lee,M.S.; Chen,L.H.; Chen,Y.P.; Liu,Y.P.; Li,W.C.; Lin,Y.L.; Lee,F.; Ting,L.J.
EPI750122	HA	Taiwan	2015-Jan-11	EPI_ISL_219875	A/goose/Taiwan/01019/2015		Import from public-domain	Lee,M.S.; Chen,L.H.; Chen,Y.P.; Liu,Y.P.; Li,W.C.; Lin,Y.L.; Lee,F.; Ting,L.J.
EPI750130	HA	Taiwan	2015-Jan-12	EPI_ISL_219876	A/goose/Taiwan/01026/2015		Import from public-domain	Lee,M.S.; Chen,L.H.; Chen,Y.P.; Liu,Y.P.; Li,W.C.; Lin,Y.L.; Lee,F.; Ting,L.J.
EPI750138	HA	Taiwan	2015-Jan-12	EPI_ISL_219877	A/goose/Taiwan/01039/2015		Import from public-domain	Lee,M.S.; Chen,L.H.; Chen,Y.P.; Liu,Y.P.; Li,W.C.; Lin,Y.L.; Lee,F.; Ting,L.J.
EPI750146	HA	Taiwan	2015-Jan-09	EPI_ISL_219878	A/duck/Taiwan/01006/2015		Import from public-domain	Lee,M.S.; Chen,L.H.; Chen,Y.P.; Liu,Y.P.; Li,W.C.; Lin,Y.L.; Lee,F.; Ting,L.J.
EPI750154	HA	Taiwan	2015-Jan-12	EPI_ISL_219879	A/goose/Taiwan/01022/2015		Import from public-domain	Lee,M.S.; Chen,L.H.; Chen,Y.P.; Liu,Y.P.; Li,W.C.; Lin,Y.L.; Lee,F.; Ting,L.J.
EPI750162	HA	Taiwan	2015-Jan-12	EPI_ISL_219880	A/goose/Taiwan/01023/2015		Import from public-domain	Lee,M.S.; Chen,L.H.; Chen,Y.P.; Liu,Y.P.; Li,W.C.; Lin,Y.L.; Lee,F.; Ting,L.J.
EPI750170	HA	Taiwan	2015-Jan-12	EPI_ISL_219881	A/goose/Taiwan/01031/2015		Import from public-domain	Lee,M.S.; Chen,L.H.; Chen,Y.P.; Liu,Y.P.; Li,W.C.; Lin,Y.L.; Lee,F.; Ting,L.J.
EPI750178	HA	Taiwan	2015-Jan-12	EPI_ISL_219882	A/goose/Taiwan/01040/2015		Import from public-domain	Lee,M.S.; Chen,L.H.; Chen,Y.P.; Liu,Y.P.; Li,W.C.; Lin,Y.L.; Lee,F.; Ting,L.J.
EPI750216	HA	Iraq	2015-May-06	EPI_ISL_219892	A/chicken/Iraq/KCVL-007/2015		Import from public-domain	Dizayee,B.A.; Khalef,E.L.; Sdeq,D.O.
EPI750217	HA	Iraq	2015-May-06	EPI_ISL_219893	A/chicken/Iraq/KCVL-008/2015		Import from public-domain	Dizayee,B.A.; Khalef,E.L.; Sdeq,D.O.
EPI823451	HA	Vietnam	2015-Nov-10	EPI_ISL_231525	A/duck/Vietnam/LBM813/2015		Import from public-domain	Soda,K.; Nguyen,K.H.; Le,Q.M.; Ito,T.; Maegaki,S.
EPI823453	HA	Vietnam	2015-Nov-10	EPI_ISL_231526	A/duck/Vietnam/LBM816/2015		Import from public-domain	Soda,K.; Nguyen,K.H.; Le,Q.M.; Ito,T.; Maegaki,S.
EPI823455	HA	Vietnam	2015-Nov-10	EPI_ISL_231527	A/duck/Vietnam/LBM824/2015		Import from public-domain	Soda,K.; Nguyen,K.H.; Le,Q.M.; Ito,T.; Maegaki,S.
EPI823940	HA	China	2016-Apr-21	EPI_ISL_231747	A/duck/Hubei/SZY250/2016		Import from public-domain	Yao,Y.; Chen,J.
EPI866708	HA	Japan	2016-Nov-14	EPI_ISL_239351	A/duck/Hyogo/1/2016	Hyogo Prefectural Institute of Public Health and Consumer Sciences	National Institute of Infectious Diseases (NIID)	Nakauchi,Mina; Saito,Shinji; Takayama,Ikuyo; Kageyama,Tsutomu; Odagiri,Takato
EPI866993	HA	Japan	2016-Nov-28	EPI_ISL_239421	A/muscovy duck/Aomori/1-2T/2016	National Institute of Animal Health	National Institute of Animal Health	Uchida, Y.
EPI867001	HA	Japan	2016-Dec-02	EPI_ISL_239422	A/muscovy duck/Aomori/2-4T/2016	National Institute of Animal Health	National Institute of Animal Health	Uchida, Y.
EPI867009	HA	Japan	2016-Nov-30	EPI_ISL_239423	A/chicken/Niigata/2-7T/2016	National Institute of Animal Health	National Institute of Animal Health	Uchida, Y.
EPI867017	HA	Japan	2016-Nov-28	EPI_ISL_239424	A/muscovy duck/Aomori/1-10C/2016	National Institute of Animal Health	National Institute of Animal Health	Uchida, Y.
EPI867025	HA	Japan	2016-Nov-30	EPI_ISL_239425	A/chicken/Niigata/2-6T/2016	National Institute of Animal Health	National Institute of Animal Health	Uchida, Y.
EPI867033	HA	Japan	2016-Nov-30	EPI_ISL_239426	A/chicken/Niigata/2-8T/2016	National Institute of Animal Health	National Institute of Animal Health	Uchida, Y.
EPI867041	HA	Japan	2016-Nov-30	EPI_ISL_239427	A/chicken/Niigata/2-5C/2016	National Institute of Animal Health	National Institute of Animal Health	Uchida, Y.
EPI867049	HA	Japan	2016-Dec-02	EPI_ISL_239428	A/muscovy duck/Aomori/2-2T/2016	National Institute of Animal Health	National Institute of Animal Health	Uchida, Y.
EPI867057	HA	Japan	2016-Nov-28	EPI_ISL_239429	A/muscovy duck/Aomori/1-7T/2016	National Institute of Animal Health	National Institute of Animal Health	Uchida, Y.
EPI867065	HA	Japan	2016-Dec-02	EPI_ISL_239430	A/muscovy duck/Aomori/2-1C/2016	National Institute of Animal Health	National Institute of Animal Health	Uchida, Y.
EPI867073	HA	Japan	2016-Dec-02	EPI_ISL_239431	A/muscovy duck/Aomori/2-3T/2016	National Institute of Animal Health	National Institute of Animal Health	Uchida, Y.
EPI867089	HA	Japan	2016-Nov-28	EPI_ISL_239433	A/muscovy duck/Aomori/1-3T/2016	National Institute of Animal Health	National Institute of Animal Health	Uchida, Y.
EPI867580	HA	Japan	2016-Nov-19	EPI_ISL_239573	A/crane/Kagoshima/KU-4/2016(H5N6)	Kagoshima University	Kagoshima University
EPI869709	HA	Japan	2016-Dec-15	EPI_ISL_239999	A/black headed gull/Ibaraki/235T/2016	National Institute of Animal Health	National Institute of Animal Health	Mine, J.
EPI869717	HA	Japan	2016-Dec-18	EPI_ISL_240000	A/black headed gull/Ibaraki/253T/2016	National Institute of Animal Health	National Institute of Animal Health	Mine, J.
EPI869725	HA	Japan	2016-Dec-16	EPI_ISL_240001	A/mute swan/Ibaraki/239C/2016	National Institute of Animal Health	National Institute of Animal Health	Mine, J.
EPI869733	HA	Japan	2016-Dec-15	EPI_ISL_240002	A/mute swan/Ibaraki/236T/2016	National Institute of Animal Health	National Institute of Animal Health	Mine, J.
EPI869741	HA	Japan	2016-Dec-17	EPI_ISL_240003	A/mute swan/Ibaraki/250T/2016	National Institute of Animal Health	National Institute of Animal Health	Mine, J.
EPI869749	HA	Japan	2016-Dec-16	EPI_ISL_240004	A/mute swan/Ibaraki/245C/2016	National Institute of Animal Health	National Institute of Animal Health	Mine, J.
EPI869757	HA	Japan	2016-Dec-14	EPI_ISL_240005	A/mute swan/Ibaraki/232C/2016	National Institute of Animal Health	National Institute of Animal Health	Mine, J.
EPI869765	HA	Japan	2016-Dec-16	EPI_ISL_240006	A/mute swan/Ibaraki/247C/2016	National Institute of Animal Health	National Institute of Animal Health	Mine, J.
EPI869773	HA	Japan	2016-Dec-16	EPI_ISL_240007	A/mute swan/Ibaraki/240C/2016	National Institute of Animal Health	National Institute of Animal Health	Mine, J.
EPI869781	HA	Japan	2016-Dec-17	EPI_ISL_240008	A/mute swan/Ibaraki/249T/2016	National Institute of Animal Health	National Institute of Animal Health	Mine, J.
EPI869789	HA	Japan	2016-Dec-16	EPI_ISL_240009	A/mute swan/Ibaraki/242T/2016	National Institute of Animal Health	National Institute of Animal Health	Mine, J.
EPI869797	HA	Japan	2016-Dec-15	EPI_ISL_240010	A/black headed gull/Ibaraki/235C/2016	National Institute of Animal Health	National Institute of Animal Health	Mine, J.
EPI869805	HA	Japan	2016-Dec-18	EPI_ISL_240011	A/mute swan/Ibaraki/254C/2016	National Institute of Animal Health	National Institute of Animal Health	Mine, J.
EPI891567	HA	Japan	2017-Jan-17	EPI_ISL_243677	A/black swan/Ibaraki/345T/2017		National Institute of Animal Health
EPI891583	HA	Japan	2017-Jan-17	EPI_ISL_243679	A/black swan/Ibaraki/345C/2017		National Institute of Animal Health
EPI893488	HA	Vietnam	2015-Aug-15	EPI_ISL_244141	A/Muscovy duck/Vietnam/HU3-97/2015(H5N1)		Import from public-domain	Nguyen,T.L.; Chu,D.C.; Hiono,T.; Matsuno,K.; Okamatsu,M.; Sakoda,Y.; Hatamachi,J.
EPI893496	HA	Vietnam	2015-Aug-15	EPI_ISL_244142	A/Muscovy duck/Vietnam/HU3-353/2015(H5N1)		Import from public-domain	Nguyen,T.L.; Chu,D.C.; Hiono,T.; Matsuno,K.; Okamatsu,M.; Sakoda,Y.; Hatamachi,J.
EPI893505	HA	Vietnam	2015-Aug-15	EPI_ISL_244143	A/duck/Vietnam/HU3-16/2015(H5N1)		Import from public-domain	Nguyen,T.L.; Chu,D.C.; Hiono,T.; Matsuno,K.; Okamatsu,M.; Sakoda,Y.; Hatamachi,J.
EPI893512	HA	Vietnam	2015-Aug-15	EPI_ISL_244144	A/chicken/Vietnam/HU3-67/2015(H5N1)		Import from public-domain	Nguyen,T.L.; Chu,D.C.; Hiono,T.; Matsuno,K.; Okamatsu,M.; Sakoda,Y.; Hatamachi,J.
EPI893524	HA	Vietnam	2015-Aug-15	EPI_ISL_244145	A/chicken/Vietnam/HU3-83/2015(H5N1)		Import from public-domain	Nguyen,T.L.; Chu,D.C.; Hiono,T.; Matsuno,K.; Okamatsu,M.; Sakoda,Y.; Hatamachi,J.
EPI894950	HA	Vietnam	2015-Apr-02	EPI_ISL_244487	A/chicken/Vietnam/NCVD-15A22/2015		Import from public-domain	Davis,T.; Jang,Y.
EPI895024	HA	Vietnam	2015-Mar-13	EPI_ISL_244513	A/chicken/Vietnam/NCVD-15A17/2015		Import from public-domain	Davis,T.; Jang,Y.
EPI895031	HA	Vietnam	2015-Apr-22	EPI_ISL_244514	A/goose/Vietnam/NCVD-15A27/2015		Import from public-domain	Davis,T.; Jang,Y.
EPI895043	HA	Vietnam	2015-Jul-15	EPI_ISL_244515	A/chicken/Vietnam/NCVD-15A51/2015		Import from public-domain	Davis,T.; Jang,Y.
EPI895038	HA	Vietnam	2015-Jul-15	EPI_ISL_244515	A/chicken/Vietnam/NCVD-15A51/2015		Import from public-domain	Davis,T.; Jang,Y.
EPI895046	HA	Vietnam	2015-Aug-04	EPI_ISL_244516	A/chicken/Vietnam/NCVD-15A55/2015		Import from public-domain	Davis,T.; Jang,Y.
EPI895054	HA	Vietnam	2015-Aug-01	EPI_ISL_244517	A/duck/Vietnam/NCVD-15A57/2015		Import from public-domain	Davis,T.; Jang,Y.
EPI895059	HA	Vietnam	2015-Aug-01	EPI_ISL_244517	A/duck/Vietnam/NCVD-15A57/2015		Import from public-domain	Davis,T.; Jang,Y.
EPI895063	HA	Vietnam	2015-Aug-18	EPI_ISL_244518	A/chicken/Vietnam/NCVD-15A59/2015		Import from public-domain	Davis,T.; Jang,Y.
EPI895068	HA	Vietnam	2015-Aug-18	EPI_ISL_244518	A/chicken/Vietnam/NCVD-15A59/2015		Import from public-domain	Davis,T.; Jang,Y.
EPI895070	HA	Vietnam	2015-Aug-18	EPI_ISL_244518	A/chicken/Vietnam/NCVD-15A59/2015		Import from public-domain	Davis,T.; Jang,Y.
EPI895106	HA	Korea, Republic of	2016-Nov-20	EPI_ISL_244523	A/whooper swan/Korea/Gangjin 48/2016		Import from public-domain	Jeong,J.; Woo,C.
EPI895111	HA	China	2015-Nov-15	EPI_ISL_244524	A/duck/Hubei/ZYSYF1/2015		Import from public-domain	Chen,L.J.; Tian,J.H.; Lin,X.D.; Liao,Y.; Shi,M.; Zhang,Y.Z.
EPI895112	HA	China	2015-Nov-15	EPI_ISL_244525	A/duck/Hubei/ZYSYF24/2015		Import from public-domain	Chen,L.J.; Tian,J.H.; Lin,X.D.; Liao,Y.; Shi,M.; Zhang,Y.Z.
EPI895113	HA	China	2015-Nov-21	EPI_ISL_244526	A/duck/Hubei/ZYSYG18/2015		Import from public-domain	Chen,L.J.; Tian,J.H.; Lin,X.D.; Liao,Y.; Shi,M.; Zhang,Y.Z.
EPI895114	HA	China	2015-Nov-21	EPI_ISL_244527	A/duck/Hubei/ZYSYG5/2015		Import from public-domain	Chen,L.J.; Tian,J.H.; Lin,X.D.; Liao,Y.; Shi,M.; Zhang,Y.Z.
EPI895115	HA	China	2016-Feb-21	EPI_ISL_244528	A/chicken/Hubei/ZYSJF11/2016		Import from public-domain	Chen,L.J.; Tian,J.H.; Lin,X.D.; Liao,Y.; Shi,M.; Zhang,Y.Z.
EPI895116	HA	China	2016-Feb-21	EPI_ISL_244529	A/chicken/Hubei/ZYSJF16/2016		Import from public-domain	Chen,L.J.; Tian,J.H.; Lin,X.D.; Liao,Y.; Shi,M.; Zhang,Y.Z.
EPI895117	HA	China	2016-Feb-21	EPI_ISL_244530	A/chicken/Hubei/ZYSJF22/2016		Import from public-domain	Chen,L.J.; Tian,J.H.; Lin,X.D.; Liao,Y.; Shi,M.; Zhang,Y.Z.
EPI895118	HA	China	2016-Feb-21	EPI_ISL_244531	A/chicken/Hubei/ZYSJF38/2016		Import from public-domain	Chen,L.J.; Tian,J.H.; Lin,X.D.; Liao,Y.; Shi,M.; Zhang,Y.Z.
EPI895119	HA	China	2016-Feb-19	EPI_ISL_244532	A/chicken/Taishun/TS12/2016		Import from public-domain	Chen,L.J.; Tian,J.H.; Lin,X.D.; Liao,Y.; Shi,M.; Zhang,Y.Z.
EPI895120	HA	China	2016-Feb-19	EPI_ISL_244533	A/chicken/Taishun/TS90/2016		Import from public-domain	Chen,L.J.; Tian,J.H.; Lin,X.D.; Liao,Y.; Shi,M.; Zhang,Y.Z.
EPI895121	HA	China	2016-Feb-19	EPI_ISL_244534	A/chicken/Taishun/TS2/2016		Import from public-domain	Chen,L.J.; Tian,J.H.; Lin,X.D.; Liao,Y.; Shi,M.; Zhang,Y.Z.
EPI895122	HA	China	2015-Dec-12	EPI_ISL_244535	A/chicken/Ganzhou/GZ27/2015		Import from public-domain	Chen,L.J.; Tian,J.H.; Lin,X.D.; Liao,Y.; Shi,M.; Zhang,Y.Z.
EPI895123	HA	China	2015-Dec-12	EPI_ISL_244536	A/chicken/Ganzhou/GZ21/2015		Import from public-domain	Chen,L.J.; Tian,J.H.; Lin,X.D.; Liao,Y.; Shi,M.; Zhang,Y.Z.
EPI895124	HA	China	2015-Dec-12	EPI_ISL_244537	A/chicken/Ganzhou/GZ50/2015		Import from public-domain	Chen,L.J.; Tian,J.H.; Lin,X.D.; Liao,Y.; Shi,M.; Zhang,Y.Z.
EPI895129	HA	Korea, Republic of	2016-Nov-20	EPI_ISL_244538	A/whooper swan/Korea/Gangjin 49_2/2016		Import from public-domain	Jeong,J.; Woo,C.
EPI895136	HA	Korea, Republic of	2016-Nov-20	EPI_ISL_244539	A/whooper swan/Korea/Gangjin 49_1/2016		Import from public-domain	Jeong,J.; Woo,C.
EPI940689	HA	Iraq	2015-Jan-01	EPI_ISL_252486	A/peafowl/Kirkuk/1/2015		Import from public-domain	Rashid,P.M.; Saeed,N.M.; Dyary,H.O.; Rashid,P.M.A.
EPI940690	HA	Iraq	2015-Jul-01	EPI_ISL_252487	A/peafowl/Kirkuk/2/2015		Import from public-domain	Rashid,P.M.; Saeed,N.M.; Dyary,H.O.; Rashid,P.M.A.
EPI940801	HA	China	2015-Apr-05	EPI_ISL_252506	A/wild bird/Jiangsu/H443/2015		Import from public-domain	Jiang,W.; Hou,G.; Li,J.; Peng,C.; Wang,S.; Chen,J.
EPI940803	HA	China	2015-Apr-05	EPI_ISL_252507	A/wild bird/Jiangsu/H438/2015		Import from public-domain	Jiang,W.; Hou,G.; Li,J.; Peng,C.; Wang,S.; Chen,J.
EPI940805	HA	China	2015-Apr-05	EPI_ISL_252508	A/wild bird/Jiangsu/H436/2015		Import from public-domain	Jiang,W.; Hou,G.; Li,J.; Peng,C.; Wang,S.; Chen,J.
EPI940807	HA	China	2015-Apr-05	EPI_ISL_252509	A/wild bird/Jiangsu/H416/2015		Import from public-domain	Jiang,W.; Hou,G.; Li,J.; Peng,C.; Wang,S.; Chen,J.
EPI940809	HA	China	2015-Apr-05	EPI_ISL_252510	A/wild bird/Jiangsu/H410/2015		Import from public-domain	Jiang,W.; Hou,G.; Li,J.; Peng,C.; Wang,S.; Chen,J.
EPI940811	HA	China	2015-Apr-05	EPI_ISL_252511	A/wild bird/Jiangsu/H226/2015		Import from public-domain	Jiang,W.; Hou,G.; Li,J.; Peng,C.; Wang,S.; Chen,J.
EPI940813	HA	China	2015-Apr-05	EPI_ISL_252512	A/wild bird/Jiangsu/H220/2015		Import from public-domain	Jiang,W.; Hou,G.; Li,J.; Peng,C.; Wang,S.; Chen,J.
EPI940815	HA	China	2015-Apr-05	EPI_ISL_252513	A/wild bird/Jiangsu/H184/2015		Import from public-domain	Jiang,W.; Hou,G.; Li,J.; Peng,C.; Wang,S.; Chen,J.
EPI940816	HA	China	2015-Apr-05	EPI_ISL_252514	A/wild bird/Jiangsu/H167/2015		Import from public-domain	Jiang,W.; Hou,G.; Li,J.; Peng,C.; Wang,S.; Chen,J.
EPI940817	HA	China	2015-Apr-05	EPI_ISL_252515	A/wild bird/Jiangsu/H102/2015		Import from public-domain	Jiang,W.; Hou,G.; Li,J.; Peng,C.; Wang,S.; Chen,J.
EPI940821	HA	China	2015-Apr-05	EPI_ISL_252516	A/wild bird/Jiangsu/H59/2015		Import from public-domain	Jiang,W.; Hou,G.; Li,J.; Peng,C.; Wang,S.; Chen,J.
EPI957824	HA	China	2015-Sep-13	EPI_ISL_255689	A/duck/Hunan/HN214/2015		Wuhan Institute of Virology
EPI957834	HA	China	2015-Sep-13	EPI_ISL_255691	A/duck/Hunan/HN215/2015		Wuhan Institute of Virology
EPI957843	HA	China	2015-Sep-13	EPI_ISL_255692	A/duck/Hunan/HN216/2015		Wuhan Institute of Virology
EPI957851	HA	China	2015-Sep-13	EPI_ISL_255694	A/duck/Hunan/HN217/2015		Wuhan Institute of Virology
EPI957861	HA	China	2015-Sep-13	EPI_ISL_255695	A/duck/Hunan/HN220/2015		Wuhan Institute of Virology
EPI957872	HA	China	2015-Sep-13	EPI_ISL_255698	A/duck/Hunan/HN221/2015		Wuhan Institute of Virology
EPI957881	HA	China	2015-Sep-13	EPI_ISL_255699	A/duck/Hunan/HN224/2015		Wuhan Institute of Virology
EPI957891	HA	China	2015-Sep-13	EPI_ISL_255701	A/duck/Hunan/HN227/2015		Wuhan Institute of Virology
EPI957899	HA	China	2015-Sep-13	EPI_ISL_255702	A/duck/Hunan/HN230/2015		Wuhan Institute of Virology
EPI957907	HA	China	2015-Sep-13	EPI_ISL_255703	A/duck/Hunan/HN234/2015		Wuhan Institute of Virology
EPI957951	HA	China	2015-Sep-13	EPI_ISL_255738	A/duck/Hunan/HN236/2015		Wuhan Institute of Virology
EPI957959	HA	China	2015-Sep-13	EPI_ISL_255741	A/duck/Hunan/HN238/2015		Wuhan Institute of Virology
EPI957967	HA	China	2015-Sep-13	EPI_ISL_255742	A/duck/Hunan/HN239/2015		Wuhan Institute of Virology
EPI957975	HA	China	2015-Sep-13	EPI_ISL_255743	A/duck/Hunan/HN240/2015		Wuhan Institute of Virology
EPI957983	HA	China	2015-Sep-13	EPI_ISL_255744	A/duck/Hunan/HN241/2015		Wuhan Institute of Virology
EPI957991	HA	China	2015-Sep-13	EPI_ISL_255746	A/duck/Hunan/HN242/2015		Wuhan Institute of Virology
EPI958003	HA	China	2015-Dec-17	EPI_ISL_255747	A/duck/Hunan/HN271/2015		Wuhan Institute of Virology
EPI958012	HA	China	2015-Dec-17	EPI_ISL_255749	A/duck/Hunan/HN277/2015		Wuhan Institute of Virology
EPI958022	HA	China	2015-Dec-16	EPI_ISL_255751	A/duck/Hunan/HN278/2015		Wuhan Institute of Virology
EPI958030	HA	China	2015-Dec-16	EPI_ISL_255752	A/duck/Hunan/HN285/2015		Wuhan Institute of Virology
EPI958040	HA	China	2015-Dec-16	EPI_ISL_255754	A/duck/Hunan/HN288/2015		Wuhan Institute of Virology
EPI958048	HA	China	2015-Apr-06	EPI_ISL_255755	A/duck/Hunan/HN29/2015		Wuhan Institute of Virology
EPI958056	HA	China	2015-Dec-18	EPI_ISL_255756	A/duck/Hunan/HN333/2015		Wuhan Institute of Virology
EPI958064	HA	China	2015-Dec-18	EPI_ISL_255757	A/duck/Hunan/HN334/2015		Wuhan Institute of Virology
EPI958072	HA	China	2015-Dec-18	EPI_ISL_255758	A/duck/Hunan/HN335/2015		Wuhan Institute of Virology
EPI958080	HA	China	2015-Dec-18	EPI_ISL_255759	A/duck/Hunan/HN336/2015		Wuhan Institute of Virology
EPI958088	HA	China	2015-Dec-18	EPI_ISL_255760	A/duck/Hunan/HN339/2015		Wuhan Institute of Virology
EPI958096	HA	China	2015-Dec-18	EPI_ISL_255761	A/duck/Hunan/HN341/2015		Wuhan Institute of Virology
EPI958104	HA	China	2015-Dec-18	EPI_ISL_255762	A/duck/Hunan/HN342/2015		Wuhan Institute of Virology
EPI958112	HA	China	2015-Dec-18	EPI_ISL_255763	A/duck/Hunan/HN343/2015		Wuhan Institute of Virology
EPI958120	HA	China	2015-Apr-06	EPI_ISL_255764	A/duck/Hunan/HN42/2015		Wuhan Institute of Virology
EPI958128	HA	China	2015-Apr-06	EPI_ISL_255765	A/duck/Hunan/HN45/2015		Wuhan Institute of Virology
EPI958136	HA	China	2015-Apr-06	EPI_ISL_255766	A/duck/Hunan/HN53/2015		Wuhan Institute of Virology
EPI958145	HA	China	2015-Apr-06	EPI_ISL_255768	A/duck/Hunan/HN54/2015		Wuhan Institute of Virology
EPI958153	HA	China	2015-Apr-06	EPI_ISL_255769	A/duck/Hunan/HN59/2015		Wuhan Institute of Virology
EPI958161	HA	China	2015-Apr-06	EPI_ISL_255770	A/duck/Hunan/HN60/2015		Wuhan Institute of Virology
EPI958169	HA	China	2015-Apr-06	EPI_ISL_255771	A/duck/Hunan/HN61/2015		Wuhan Institute of Virology
EPI958177	HA	China	2015-Apr-06	EPI_ISL_255772	A/duck/Hunan/HN64/2015		Wuhan Institute of Virology
EPI958186	HA	China	2015-Apr-06	EPI_ISL_255773	A/duck/Hunan/HN66/2015		Wuhan Institute of Virology
EPI958194	HA	China	2015-Apr-06	EPI_ISL_255774	A/duck/Hunan/HN67/2015		Wuhan Institute of Virology
EPI958202	HA	China	2015-Apr-06	EPI_ISL_255775	A/duck/Hunan/HN71/2015		Wuhan Institute of Virology
EPI958519	HA	China	2015-Apr-06	EPI_ISL_255816	A/duck/Hunan/HN72/2015		Wuhan Institute of Virology
EPI958527	HA	China	2015-Apr-06	EPI_ISL_255817	A/duck/Hunan/HN74/2015		Wuhan Institute of Virology
EPI958535	HA	China	2015-Apr-06	EPI_ISL_255818	A/duck/Hunan/HN76/2015		Wuhan Institute of Virology
EPI958543	HA	China	2015-Apr-06	EPI_ISL_255819	A/duck/Hunan/HN78/2015		Wuhan Institute of Virology
EPI958551	HA	China	2015-Apr-06	EPI_ISL_255820	A/duck/Hunan/HN80/2015		Wuhan Institute of Virology
EPI958559	HA	China	2015-Dec-16	EPI_ISL_255821	A/environment/Hunan/HN261/2015		Wuhan Institute of Virology
EPI958567	HA	China	2015-Dec-19	EPI_ISL_255822	A/goose/Anhui/AH350/2015		Wuhan Institute of Virology
EPI958583	HA	China	2015-Nov-13	EPI_ISL_255824	A/goose/HuBei/117/2014		Wuhan Institute of Virology
EPI958648	HA	China	2015-Nov-13	EPI_ISL_255832	A/goose/Hunan/159/2014		Wuhan Institute of Virology
EPI958688	HA	China	2015-Apr-07	EPI_ISL_255836	A/goose/Hunan/HN11/2015		Wuhan Institute of Virology
EPI958696	HA	China	2015-Apr-07	EPI_ISL_255837	A/goose/Hunan/HN22/2015		Wuhan Institute of Virology
EPI958704	HA	China	2015-Dec-17	EPI_ISL_255838	A/goose/Hunan/HN310/2015		Wuhan Institute of Virology
EPI958712	HA	China	2015-Dec-17	EPI_ISL_255839	A/goose/Hunan/HN311/2015		Wuhan Institute of Virology
EPI958720	HA	China	2015-Dec-18	EPI_ISL_255840	A/goose/Hunan/HN314/2015		Wuhan Institute of Virology
EPI958728	HA	China	2015-Dec-18	EPI_ISL_255841	A/goose/Hunan/HN315/2015		Wuhan Institute of Virology
EPI958736	HA	China	2015-Dec-18	EPI_ISL_255842	A/goose/Hunan/HN316/2015		Wuhan Institute of Virology
EPI958744	HA	China	2015-Dec-18	EPI_ISL_255843	A/goose/Hunan/HN317/2015		Wuhan Institute of Virology
EPI958752	HA	China	2015-Dec-18	EPI_ISL_255844	A/goose/Hunan/HN318/2015		Wuhan Institute of Virology
EPI958760	HA	China	2015-Dec-18	EPI_ISL_255845	A/goose/Hunan/HN319/2015		Wuhan Institute of Virology
EPI958768	HA	China	2015-Dec-18	EPI_ISL_255846	A/goose/Hunan/HN325/2015		Wuhan Institute of Virology
EPI958776	HA	China	2015-Sep-13	EPI_ISL_255847	A/goose/Hunan/HN57/2015		Wuhan Institute of Virology
EPI958784	HA	China	2015-Apr-07	EPI_ISL_255848	A/goose/Hunan/HN88/2015		Wuhan Institute of Virology
EPI958792	HA	China	2015-Apr-07	EPI_ISL_255849	A/goose/Hunan/HN90/2015		Wuhan Institute of Virology
EPI958800	HA	China	2015-Apr-07	EPI_ISL_255850	A/goose/SiChuan/15/2015		Wuhan Institute of Virology
EPI958970	HA	China	2015-Dec-19	EPI_ISL_255872	A/muscovy/duck/Hunan/HN346/2015		Wuhan Institute of Virology
EPI958978	HA	China	2015-Dec-19	EPI_ISL_255873	A/muscovy/duck/Hunan/HN347/2015		Wuhan Institute of Virology
EPI958986	HA	China	2015-Dec-19	EPI_ISL_255874	A/muscovy/duck/Hunan/HN348/2015		Wuhan Institute of Virology
EPI958994	HA	China	2015-Dec-19	EPI_ISL_255875	A/muscovy/duck/Hunan/HN349/2015		Wuhan Institute of Virology
EPI959002	HA	China	2015-Dec-19	EPI_ISL_255876	A/muscovy/duck/Hunan/HN350/2015		Wuhan Institute of Virology
EPI959010	HA	China	2015-Dec-19	EPI_ISL_255877	A/muscovy/duck/Hunan/HN351/2015		Wuhan Institute of Virology
EPI959018	HA	China	2015-Dec-19	EPI_ISL_255878	A/muscovy/duck/Hunan/HN352/2015		Wuhan Institute of Virology
EPI959026	HA	China	2015-Dec-19	EPI_ISL_255879	A/muscovy/duck/Hunan/HN353/2015		Wuhan Institute of Virology
EPI959034	HA	China	2015-Dec-19	EPI_ISL_255880	A/muscovy/duck/Hunan/HN354/2015		Wuhan Institute of Virology
EPI959042	HA	China	2015-Dec-19	EPI_ISL_255881	A/muscovy/duck/Hunan/HN355/2015		Wuhan Institute of Virology
EPI959050	HA	China	2015-Dec-19	EPI_ISL_255882	A/muscovy/duck/Hunan/HN356/2015		Wuhan Institute of Virology
EPI959058	HA	China	2015-Dec-19	EPI_ISL_255883	A/muscovy/duck/Hunan/HN358/2015		Wuhan Institute of Virology
EPI959066	HA	China	2015-Dec-19	EPI_ISL_255884	A/muscovy/duck/Hunan/HN359/2015		Wuhan Institute of Virology
EPI959074	HA	China	2015-Dec-19	EPI_ISL_255885	A/muscovy/duck/Hunan/HN360/2015		Wuhan Institute of Virology
EPI959082	HA	China	2015-Dec-19	EPI_ISL_255886	A/muscovy/duck/Hunan/HN364/2015		Wuhan Institute of Virology
EPI959090	HA	China	2015-Dec-19	EPI_ISL_255887	A/muscovy/duck/Hunan/HN365/2015		Wuhan Institute of Virology
EPI959098	HA	China	2015-Dec-19	EPI_ISL_255888	A/muscovy/duck/Hunan/HN366/2015		Wuhan Institute of Virology
EPI959106	HA	China	2015-Dec-19	EPI_ISL_255889	A/muscovy/duck/Hunan/HN368/2015		Wuhan Institute of Virology
EPI959122	HA	China	2015-Sep-13	EPI_ISL_255890	A/duck/Hunan/HN232/2015		Wuhan Institute of Virology
EPI961922	HA	Taiwan	2016-Sep-30	EPI_ISL_256396	A/chicken/Taiwan/u7/2016		Animal Health Research Institute	Yu-Ju,Lin; Li-Hsuan,Chen; Wan-Chen,Li; Yen-Ping,Chen; Yu-Pin,Liu; Fan,Lee; Wen-Jane,Tu
EPI961935	HA	Cambodia	2015-Nov-13	EPI_ISL_256397	A/duck/Cambodia/Z1120502/2015	Institut Pasteur du Cambodia	Institut Pasteur du Cambodia	Horm, S-V; Dussart,P
EPI961933	HA	Taiwan	2016-Dec-21	EPI_ISL_256398	A/chicken/Taiwan/x37/2016		Animal Health Research Institute	Yu-Ju,Lin; Li-Hsuan,Chen; Wan-Chen,Li; Yen-Ping,Chen; Yu-Pin,Liu; Fan,Lee; Wen-Jane,Tu
EPI961944	HA	Cambodia	2015-Nov-13	EPI_ISL_256399	A/duck/Cambodia/Z1120503/2015	Institut Pasteur du Cambodia	Institut Pasteur du Cambodia	Horm, S-V; Dussart,P
EPI961949	HA	Cambodia	2015-Nov-13	EPI_ISL_256400	A/duck/Cambodia/Z1120504/2015	Institut Pasteur du Cambodia	Institut Pasteur du Cambodia	Horm, S-V; Dussart,P
EPI961954	HA	Cambodia	2015-Nov-13	EPI_ISL_256401	A/duck/Cambodia/Z1120505/2015	Institut Pasteur du Cambodia	Institut Pasteur du Cambodia	Horm, S-V; Dussart,P
EPI962100	HA	Cambodia	2015-Nov-16	EPI_ISL_256465	A/duck/Cambodia/Z1120508/2015	Institut Pasteur du Cambodia	Institut Pasteur du Cambodia	Horm, S-V; Dussart,P
EPI962305	HA	Japan	2016-Dec-12	EPI_ISL_256495	A/owl/Hokkaido/X6/2016	Graduate School of Veterinary Medicine, Hokkaido University	Hokkaido University
EPI962313	HA	Japan	2016-Dec-13	EPI_ISL_256496	A/peregrine falcon/Hokkaido/X7/2016	Graduate School of Veterinary Medicine, Hokkaido University	Hokkaido University
EPI962321	HA	Japan	2016-Dec-19	EPI_ISL_256497	A/pintail/Hokkaido/X8/2016	Graduate School of Veterinary Medicine, Hokkaido University	Hokkaido University
EPI962329	HA	Japan	2017-Jan-15	EPI_ISL_256498	A/whooper swan/Hokkaido/X12/2017	Graduate School of Veterinary Medicine, Hokkaido University	Hokkaido University
EPI962345	HA	Japan	2016-Dec-16	EPI_ISL_256500	A/chicken/Hokkaido/002/2017	Graduate School of Veterinary Medicine, Hokkaido University	Hokkaido University
EPI962353	HA	Japan	2016-Dec-06	EPI_ISL_256501	A/mute swan/Aomori/4/2016	Graduate School of Veterinary Medicine, Hokkaido University	Hokkaido University
EPI962361	HA	Cambodia	2015-Nov-16	EPI_ISL_256502	A/duck/Cambodia/Z1120509/2015	Institut Pasteur du Cambodia	Institut Pasteur du Cambodia	Horm, S-V; Dussart,P
EPI962375	HA	Japan	2016-Dec-29	EPI_ISL_256505	A/whooper swan/Aomori/9/2016	Graduate School of Veterinary Medicine, Hokkaido University	Hokkaido University
EPI962383	HA	Japan	2016-Dec-28	EPI_ISL_256506	A/grey-faced buzzard/Aomori/10/2016		Hokkaido University
EPI962391	HA	Japan	2016-Nov-23	EPI_ISL_256507	A/whooper swan/Iwate/1/2016		Hokkaido University
EPI962399	HA	Japan	2016-Dec-18	EPI_ISL_256508	A/whooper swan/Iwate/5/2016		Hokkaido University
EPI962407	HA	Japan	2016-Dec-22	EPI_ISL_256509	A/whooper swan/Iwate/8/2016		Hokkaido University
EPI962415	HA	Japan	2016-Dec-22	EPI_ISL_256510	A/tundra swan/Iwate/9/2016		Hokkaido University
EPI962423	HA	Japan	2016-Dec-21	EPI_ISL_256511	A/whooper swan/Iwate/11/2016		Hokkaido University
EPI962431	HA	Japan	2016-Dec-22	EPI_ISL_256512	A/coot/Iwate/13/2016		Hokkaido University
EPI962439	HA	Japan	2017-Jan-16	EPI_ISL_256513	A/whooper swan/Iwate/17/2016		Hokkaido University
EPI962447	HA	Japan	2016-Nov-21	EPI_ISL_256514	A/white-fronted goose/Miyagi/1/2016		Hokkaido University
EPI962455	HA	Japan	2016-Nov-26	EPI_ISL_256515	A/white-fronted goose/Miyagi/2/2016		Hokkaido University
EPI962463	HA	Japan	2016-Dec-02	EPI_ISL_256516	A/whooper swan/Fukushima/1/2016		Hokkaido University
EPI962471	HA	Japan	2016-Dec-14	EPI_ISL_256517	A/whooper swan/Fukushima/3/2016		Hokkaido University
EPI962479	HA	Japan	2016-Dec-08	EPI_ISL_256518	A/tundra swan/Niigata/1/2016		Hokkaido University
EPI962487	HA	Japan	2016-Dec-11	EPI_ISL_256519	A/tundra swan/Niigata/4/2016		Hokkaido University
EPI962495	HA	Japan	2016-Dec-13	EPI_ISL_256520	A/tundra swan/Niigata/8/2016		Hokkaido University
EPI962503	HA	Japan	2017-Jan-01	EPI_ISL_256521	A/peregrine falcon/Niigata/12/2017		Hokkaido University
EPI962519	HA	Japan	2016-Dec-14	EPI_ISL_256523	A/mute swan/Ibaraki/7/2016		Hokkaido University
EPI962535	HA	Cambodia	2016-May-10	EPI_ISL_256525	A/chicken/Cambodia/a0511501/2016	Institut Pasteur du Cambodia	Institut Pasteur du Cambodia	Horm, S-V; Dussart,P
EPI962542	HA	Cambodia	2016-May-10	EPI_ISL_256526	A/chicken/Cambodia/a0511502/2016	Institut Pasteur du Cambodia	Institut Pasteur du Cambodia	Horm, S-V; Dussart,P
EPI962549	HA	Cambodia	2016-May-10	EPI_ISL_256527	A/chicken/Cambodia/a0511503/2016	Institut Pasteur du Cambodia	Institut Pasteur du Cambodia	Horm, S-V; Dussart,P
EPI962557	HA	Cambodia	2016-May-10	EPI_ISL_256528	A/chicken/Cambodia/a0511504/2016	Institut Pasteur du Cambodia	Institut Pasteur du Cambodia	Horm, S-V; Dussart,P
EPI985350	HA	Japan	2016-Dec-13	EPI_ISL_260724	A/mute swan/Ibaraki/1/2016		Hokkaido University
EPI985351	HA	Japan	2016-Dec-14	EPI_ISL_260763	A/mute swan/Ibaraki/2/2016		Hokkaido University
EPI985352	HA	Japan	2016-Dec-14	EPI_ISL_260764	A/mute swan/Ibaraki/3/2016		Hokkaido University
EPI985353	HA	Japan	2016-Dec-14	EPI_ISL_260765	A/mute swan/Ibaraki/4/2016		Hokkaido University
EPI985354	HA	Japan	2016-Dec-14	EPI_ISL_260766	A/mute swan/Ibaraki/5/2016		Hokkaido University
EPI985355	HA	Japan	2016-Dec-14	EPI_ISL_260767	A/mute swan/Ibaraki/6/2016		Hokkaido University
EPI985356	HA	Japan	2016-Nov-17	EPI_ISL_260768	A/black swan/Akita/3/2016		Hokkaido University
EPI985357	HA	Japan	2016-Dec-09	EPI_ISL_260769	A/mallard/Iwate/2/2016		Hokkaido University
EPI985358	HA	Japan	2016-Dec-13	EPI_ISL_260770	A/tundra swan/Iwate/3/2016		Hokkaido University
EPI985359	HA	Japan	2016-Dec-17	EPI_ISL_260771	A/whooper swan/Iwate/4/2016		Hokkaido University
EPI985360	HA	Japan	2016-Dec-20	EPI_ISL_260772	A/whooper swan/Iwate/6/2016		Hokkaido University
EPI985361	HA	Japan	2016-Dec-22	EPI_ISL_260773	A/whooper swan/Iwate/7/2016		Hokkaido University
EPI985362	HA	Japan	2016-Dec-25	EPI_ISL_260774	A/whooper swan/Iwate/10/2016		Hokkaido University
EPI985363	HA	Japan	2016-Dec-22	EPI_ISL_260775	A/whooper swan/Iwate/12/2016		Hokkaido University
EPI985364	HA	Japan	2016-Dec-27	EPI_ISL_260776	A/whooper swan/Iwate/14/2016		Hokkaido University
EPI985365	HA	Japan	2017-Jan-05	EPI_ISL_260777	A/swan/Iwate/15/2017		Hokkaido University
EPI985366	HA	Japan	2017-Jan-08	EPI_ISL_260778	A/whooper swan/Iwate/16/2017		Hokkaido University
EPI985370	HA	Japan	2016-Nov-24	EPI_ISL_260782	A/peregrine falcon/Hokkaido/X2/2016		Hokkaido University
EPI985371	HA	Japan	2016-Dec-02	EPI_ISL_260783	A/whooper swan/Hokkaido/X4/2016		Hokkaido University
EPI985372	HA	Japan	2016-Dec-08	EPI_ISL_260784	A/whooper swan/Hokkaido/X5/2016		Hokkaido University
EPI985375	HA	Japan	2016-Dec-02	EPI_ISL_260787	A/whooper swan/Aomori/3/2016		Hokkaido University
EPI985376	HA	Japan	2016-Dec-12	EPI_ISL_260788	A/goshawk/Aomori/5/2016		Hokkaido University
EPI985377	HA	Japan	2016-Dec-12	EPI_ISL_260789	A/whooper swan/Aomori/6/2016		Hokkaido University
EPI985378	HA	Japan	2016-Dec-13	EPI_ISL_260790	A/whooper swan/Aomori/7/2016		Hokkaido University
EPI985379	HA	Japan	2016-Dec-19	EPI_ISL_260791	A/whooper swan/Aomori/8/2016		Hokkaido University
EPI985380	HA	Japan	2016-Dec-09	EPI_ISL_260792	A/tundra swan/Niigata/2/2016		Hokkaido University
EPI985381	HA	Japan	2016-Dec-10	EPI_ISL_260793	A/tundra swan/Niigata/3/2016		Hokkaido University
EPI985382	HA	Japan	2016-Dec-11	EPI_ISL_260794	A/tundra swan/Niigata/5/2016		Hokkaido University
EPI985383	HA	Japan	2016-Dec-14	EPI_ISL_260795	A/tundra swan/Niigata/7/2016		Hokkaido University
EPI985384	HA	Japan	2016-Dec-10	EPI_ISL_260796	A/tundra swan/Niigata/9/2016		Hokkaido University
EPI985385	HA	Japan	2016-Dec-16	EPI_ISL_260797	A/tundra swan/Niigata/10/2016		Hokkaido University
EPI985386	HA	Japan	2016-Dec-19	EPI_ISL_260798	A/tundra swan/Niigata/11/2016		Hokkaido University
EPI1034518	HA	China	2016-Oct-21	EPI_ISL_272740	A/goose/Guangdong/QY01/2016		Import from public-domain	Ren,T.; Xiang,B.; Xiao,C.
EPI1054168	HA	Vietnam	2016-Jan-08	EPI_ISL_276790	A/chicken/Kon Tum/AI425/2016	National Institute of Animal Health	National Institute of Animal Health	Uchida,Y
EPI1054176	HA	Vietnam	2016-Jan-11	EPI_ISL_276791	A/chicken/Kon Tum/AI426/2016	National Institute of Animal Health	National Institute of Animal Health	Uchida,Y
EPI1055332	HA	China	2015-Jun-16	EPI_ISL_277035	A/chicken/Wuxi/6074/2015	Beijing Institute of Microbiology and Epidemiology	Beijing Institute of Microbiology and Epidemiology	Maijuan,Ma; Shanhui,Chen; Teng,Zhao
EPI1055335	HA	China	2015-Aug-18	EPI_ISL_277036	A/duck/Wuxi/6462/2015	Beijing Institute of Microbiology and Epidemiology	Beijing Institute of Microbiology and Epidemiology	Maijuan,Ma; Shanhui,Chen; Teng,Zhao
EPI1055338	HA	China	2015-Aug-18	EPI_ISL_277037	A/duck/Wuxi/6466/2015	Beijing Institute of Microbiology and Epidemiology	Beijing Institute of Microbiology and Epidemiology	Maijuan,Ma; Shanhui,Chen; Teng,Zhao
EPI1055352	HA	China	2015-Dec-19	EPI_ISL_277040	A/chicken/Wuxi/7157/2015	Beijing Institute of Microbiology and Epidemiology	Beijing Institute of Microbiology and Epidemiology	Maijuan,Ma; Shanhui,Chen; Teng,Zhao
EPI1055360	HA	China	2015-Dec-20	EPI_ISL_277041	A/duck/Wuxi/7249/2015	Beijing Institute of Microbiology and Epidemiology	Beijing Institute of Microbiology and Epidemiology	Maijuan,Ma; Shanhui,Chen; Teng,Zhao
EPI1055368	HA	China	2016-Mar-14	EPI_ISL_277042	A/chicken/Wuxi/7765/2016	Beijing Institute of Microbiology and Epidemiology	Beijing Institute of Microbiology and Epidemiology	Maijuan,Ma; Shanhui,Chen; Teng,Zhao
EPI1074700	HA	China	2016-Nov-03	EPI_ISL_280485	A/common teal/Shanghai/JDS36/2016		Import from public-domain	He,G.; Zhou,L.; Zhu,C.; Shi,H.; Li,X.; Wu,D.; Liu,J.; Lv,J.; Hu,C.; Li,Z.; Wang,Z.; Wang,T.
EPI1074701	HA	China	2016-Nov-03	EPI_ISL_280486	A/common teal/Shanghai/JDS66/2016		Import from public-domain	He,G.; Zhou,L.; Zhu,C.; Shi,H.; Li,X.; Wu,D.; Liu,J.; Lv,J.; Hu,C.; Li,Z.; Wang,Z.; Wang,T.
EPI1074702	HA	China	2016-Nov-03	EPI_ISL_280487	A/common teal/Shanghai/JDS76/2016		Import from public-domain	He,G.; Zhou,L.; Zhu,C.; Shi,H.; Li,X.; Wu,D.; Liu,J.; Lv,J.; Hu,C.; Li,Z.; Wang,Z.; Wang,T.
EPI1074703	HA	China	2016-Nov-03	EPI_ISL_280488	A/common teal/Shanghai/JDS81/2016		Import from public-domain	He,G.; Zhou,L.; Zhu,C.; Shi,H.; Li,X.; Wu,D.; Liu,J.; Lv,J.; Hu,C.; Li,Z.; Wang,Z.; Wang,T.
EPI1074704	HA	China	2016-Nov-03	EPI_ISL_280489	A/Eurasian wigeon/Shanghai/JDS101/2016		Import from public-domain	He,G.; Zhou,L.; Zhu,C.; Shi,H.; Li,X.; Wu,D.; Liu,J.; Lv,J.; Hu,C.; Li,Z.; Wang,Z.; Wang,T.
EPI1074705	HA	China	2016-Nov-17	EPI_ISL_280490	A/mandarin duck/Shanghai/PD4/2016		Import from public-domain	He,G.; Zhou,L.; Zhu,C.; Shi,H.; Li,X.; Wu,D.; Liu,J.; Lv,J.; Hu,C.; Li,Z.; Wang,Z.; Wang,T.
EPI1074706	HA	China	2016-Nov-03	EPI_ISL_280491	A/shoveller duck/Shanghai/JDS90/2016		Import from public-domain	He,G.; Zhou,L.; Zhu,C.; Shi,H.; Li,X.; Wu,D.; Liu,J.; Lv,J.; Hu,C.; Li,Z.; Wang,Z.; Wang,T.
EPI1098877	HA	Bangladesh	2016-Oct-24	EPI_ISL_284714	A/duck/Bangladesh/31094/2016		Import from public-domain	Barman,S.; Turner,J.C.; Hasan,M.K.; Akhtar,S.; Franks,J.; El-Shesheny,R.; Walker,D.; Seiler,P.; Friedman,K.; Kercher,L.; Kayali,G.; Jones-Engel,L.; McKenzie,P.; Krauss,S.; Webby,R.J.; Feeroz,M.M.; Webster,R.G.
EPI1098974	HA	Bangladesh	2016-Sep-27	EPI_ISL_284767	A/duck/Bangladesh/30892/2016		Import from public-domain	Barman,S.; Turner,J.C.; Hasan,M.K.; Akhtar,S.; Franks,J.; El-Shesheny,R.; Walker,D.; Seiler,P.; Friedman,K.; Kercher,L.; Kayali,G.; Jones-Engel,L.; McKenzie,P.; Krauss,S.; Webby,R.J.; Feeroz,M.M.; Webster,R.G.
EPI1098772	HA	Bangladesh	2016-Oct-24	EPI_ISL_284768	A/duck/Bangladesh/31096/2016		Import from public-domain	Barman,S.; Turner,J.C.; Hasan,M.K.; Akhtar,S.; Franks,J.; El-Shesheny,R.; Walker,D.; Seiler,P.; Friedman,K.; Kercher,L.; Kayali,G.; Jones-Engel,L.; McKenzie,P.; Krauss,S.; Webby,R.J.; Feeroz,M.M.; Webster,R.G.
EPI1099019	HA	Bangladesh	2016-Sep-27	EPI_ISL_284770	A/duck/Bangladesh/30885/2016		Import from public-domain	Barman,S.; Turner,J.C.; Hasan,M.K.; Akhtar,S.; Franks,J.; El-Shesheny,R.; Walker,D.; Seiler,P.; Friedman,K.; Kercher,L.; Kayali,G.; Jones-Engel,L.; McKenzie,P.; Krauss,S.; Webby,R.J.; Feeroz,M.M.; Webster,R.G.
EPI1098827	HA	Bangladesh	2016-Nov-25	EPI_ISL_284771	A/chicken/Bangladesh/31269/2016		Import from public-domain	Barman,S.; Turner,J.C.; Hasan,M.K.; Akhtar,S.; Franks,J.; El-Shesheny,R.; Walker,D.; Seiler,P.; Friedman,K.; Kercher,L.; Kayali,G.; Jones-Engel,L.; McKenzie,P.; Krauss,S.; Webby,R.J.; Feeroz,M.M.; Webster,R.G.
EPI1098828	HA	Bangladesh	2016-Nov-25	EPI_ISL_284773	A/duck/Bangladesh/31295/2016		Import from public-domain	Barman,S.; Turner,J.C.; Hasan,M.K.; Akhtar,S.; Franks,J.; El-Shesheny,R.; Walker,D.; Seiler,P.; Friedman,K.; Kercher,L.; Kayali,G.; Jones-Engel,L.; McKenzie,P.; Krauss,S.; Webby,R.J.; Feeroz,M.M.; Webster,R.G.
EPI1098888	HA	Bangladesh	2016-Oct-24	EPI_ISL_284774	A/duck/Bangladesh/31093/2016		Import from public-domain	Barman,S.; Turner,J.C.; Hasan,M.K.; Akhtar,S.; Franks,J.; El-Shesheny,R.; Walker,D.; Seiler,P.; Friedman,K.; Kercher,L.; Kayali,G.; Jones-Engel,L.; McKenzie,P.; Krauss,S.; Webby,R.J.; Feeroz,M.M.; Webster,R.G.
EPI1098802	HA	Bangladesh	2016-Oct-24	EPI_ISL_284775	A/duck/Bangladesh/31098/2016		Import from public-domain	Barman,S.; Turner,J.C.; Hasan,M.K.; Akhtar,S.; Franks,J.; El-Shesheny,R.; Walker,D.; Seiler,P.; Friedman,K.; Kercher,L.; Kayali,G.; Jones-Engel,L.; McKenzie,P.; Krauss,S.; Webby,R.J.; Feeroz,M.M.; Webster,R.G.
EPI1098906	HA	Bangladesh	2016-Nov-25	EPI_ISL_284776	A/duck/Bangladesh/31294/2016		Import from public-domain	Barman,S.; Turner,J.C.; Hasan,M.K.; Akhtar,S.; Franks,J.; El-Shesheny,R.; Walker,D.; Seiler,P.; Friedman,K.; Kercher,L.; Kayali,G.; Jones-Engel,L.; McKenzie,P.; Krauss,S.; Webby,R.J.; Feeroz,M.M.; Webster,R.G.
EPI1098907	HA	Bangladesh	2016-Sep-27	EPI_ISL_284777	A/duck/Bangladesh/30890/2016		Import from public-domain	Barman,S.; Turner,J.C.; Hasan,M.K.; Akhtar,S.; Franks,J.; El-Shesheny,R.; Walker,D.; Seiler,P.; Friedman,K.; Kercher,L.; Kayali,G.; Jones-Engel,L.; McKenzie,P.; Krauss,S.; Webby,R.J.; Feeroz,M.M.; Webster,R.G.
EPI1098955	HA	Bangladesh	2016-May-27	EPI_ISL_284778	A/chicken/Bangladesh/30065/2016		Import from public-domain	Barman,S.; Turner,J.C.; Hasan,M.K.; Akhtar,S.; Franks,J.; El-Shesheny,R.; Walker,D.; Seiler,P.; Friedman,K.; Kercher,L.; Kayali,G.; Jones-Engel,L.; McKenzie,P.; Krauss,S.; Webby,R.J.; Feeroz,M.M.; Webster,R.G.
EPI1098959	HA	Bangladesh	2016-Dec-21	EPI_ISL_284781	A/duck/Bangladesh/31549/2016		Import from public-domain	Barman,S.; Turner,J.C.; Hasan,M.K.; Akhtar,S.; Franks,J.; El-Shesheny,R.; Walker,D.; Seiler,P.; Friedman,K.; Kercher,L.; Kayali,G.; Jones-Engel,L.; McKenzie,P.; Krauss,S.; Webby,R.J.; Feeroz,M.M.; Webster,R.G.
EPI1099027	HA	Bangladesh	2016-Sep-27	EPI_ISL_284782	A/duck/Bangladesh/30818/2016		Import from public-domain	Barman,S.; Turner,J.C.; Hasan,M.K.; Akhtar,S.; Franks,J.; El-Shesheny,R.; Walker,D.; Seiler,P.; Friedman,K.; Kercher,L.; Kayali,G.; Jones-Engel,L.; McKenzie,P.; Krauss,S.; Webby,R.J.; Feeroz,M.M.; Webster,R.G.
EPI1098909	HA	Bangladesh	2016-Nov-25	EPI_ISL_284785	A/duck/Bangladesh/31296/2016		Import from public-domain	Barman,S.; Turner,J.C.; Hasan,M.K.; Akhtar,S.; Franks,J.; El-Shesheny,R.; Walker,D.; Seiler,P.; Friedman,K.; Kercher,L.; Kayali,G.; Jones-Engel,L.; McKenzie,P.; Krauss,S.; Webby,R.J.; Feeroz,M.M.; Webster,R.G.
EPI1098882	HA	Bangladesh	2016-Oct-24	EPI_ISL_284786	A/duck/Bangladesh/31028/2016		Import from public-domain	Barman,S.; Turner,J.C.; Hasan,M.K.; Akhtar,S.; Franks,J.; El-Shesheny,R.; Walker,D.; Seiler,P.; Friedman,K.; Kercher,L.; Kayali,G.; Jones-Engel,L.; McKenzie,P.; Krauss,S.; Webby,R.J.; Feeroz,M.M.; Webster,R.G.
EPI1099102	HA	Bangladesh	2016-Sep-27	EPI_ISL_284787	A/duck/Bangladesh/30817/2016		Import from public-domain	Barman,S.; Turner,J.C.; Hasan,M.K.; Akhtar,S.; Franks,J.; El-Shesheny,R.; Walker,D.; Seiler,P.; Friedman,K.; Kercher,L.; Kayali,G.; Jones-Engel,L.; McKenzie,P.; Krauss,S.; Webby,R.J.; Feeroz,M.M.; Webster,R.G.
EPI1098826	HA	Bangladesh	2016-May-28	EPI_ISL_284788	A/duck/Bangladesh/30160/2016		Import from public-domain	Barman,S.; Turner,J.C.; Hasan,M.K.; Akhtar,S.; Franks,J.; El-Shesheny,R.; Walker,D.; Seiler,P.; Friedman,K.; Kercher,L.; Kayali,G.; Jones-Engel,L.; McKenzie,P.; Krauss,S.; Webby,R.J.; Feeroz,M.M.; Webster,R.G.
EPI1098879	HA	Bangladesh	2016-May-26	EPI_ISL_284789	A/duck/Bangladesh/30057/2016		Import from public-domain	Barman,S.; Turner,J.C.; Hasan,M.K.; Akhtar,S.; Franks,J.; El-Shesheny,R.; Walker,D.; Seiler,P.; Friedman,K.; Kercher,L.; Kayali,G.; Jones-Engel,L.; McKenzie,P.; Krauss,S.; Webby,R.J.; Feeroz,M.M.; Webster,R.G.
EPI1098810	HA	Bangladesh	2016-Oct-24	EPI_ISL_284790	A/duck/Bangladesh/31091/2016		Import from public-domain	Barman,S.; Turner,J.C.; Hasan,M.K.; Akhtar,S.; Franks,J.; El-Shesheny,R.; Walker,D.; Seiler,P.; Friedman,K.; Kercher,L.; Kayali,G.; Jones-Engel,L.; McKenzie,P.; Krauss,S.; Webby,R.J.; Feeroz,M.M.; Webster,R.G.
EPI1098941	HA	Bangladesh	2016-Aug-21	EPI_ISL_284792	A/duck/Bangladesh/30682/2016		Import from public-domain	Barman,S.; Turner,J.C.; Hasan,M.K.; Akhtar,S.; Franks,J.; El-Shesheny,R.; Walker,D.; Seiler,P.; Friedman,K.; Kercher,L.; Kayali,G.; Jones-Engel,L.; McKenzie,P.; Krauss,S.; Webby,R.J.; Feeroz,M.M.; Webster,R.G.
EPI1098823	HA	Bangladesh	2016-Nov-25	EPI_ISL_284793	A/duck/Bangladesh/31299/2016		Import from public-domain	Barman,S.; Turner,J.C.; Hasan,M.K.; Akhtar,S.; Franks,J.; El-Shesheny,R.; Walker,D.; Seiler,P.; Friedman,K.; Kercher,L.; Kayali,G.; Jones-Engel,L.; McKenzie,P.; Krauss,S.; Webby,R.J.; Feeroz,M.M.; Webster,R.G.
EPI1099037	HA	Bangladesh	2016-Sep-27	EPI_ISL_284794	A/duck/Bangladesh/30884/2016		Import from public-domain	Barman,S.; Turner,J.C.; Hasan,M.K.; Akhtar,S.; Franks,J.; El-Shesheny,R.; Walker,D.; Seiler,P.; Friedman,K.; Kercher,L.; Kayali,G.; Jones-Engel,L.; McKenzie,P.; Krauss,S.; Webby,R.J.; Feeroz,M.M.; Webster,R.G.
EPI1098990	HA	Bangladesh	2016-Nov-25	EPI_ISL_284795	A/duck/Bangladesh/31297/2016		Import from public-domain	Barman,S.; Turner,J.C.; Hasan,M.K.; Akhtar,S.; Franks,J.; El-Shesheny,R.; Walker,D.; Seiler,P.; Friedman,K.; Kercher,L.; Kayali,G.; Jones-Engel,L.; McKenzie,P.; Krauss,S.; Webby,R.J.; Feeroz,M.M.; Webster,R.G.
EPI1099138	HA	Bangladesh	2016-Oct-24	EPI_ISL_284801	A/duck/Bangladesh/31097/2016		Import from public-domain	Barman,S.; Turner,J.C.; Hasan,M.K.; Akhtar,S.; Franks,J.; El-Shesheny,R.; Walker,D.; Seiler,P.; Friedman,K.; Kercher,L.; Kayali,G.; Jones-Engel,L.; McKenzie,P.; Krauss,S.; Webby,R.J.; Feeroz,M.M.; Webster,R.G.
EPI1099041	HA	Bangladesh	2016-Oct-24	EPI_ISL_284802	A/duck/Bangladesh/31022/2016		Import from public-domain	Barman,S.; Turner,J.C.; Hasan,M.K.; Akhtar,S.; Franks,J.; El-Shesheny,R.; Walker,D.; Seiler,P.; Friedman,K.; Kercher,L.; Kayali,G.; Jones-Engel,L.; McKenzie,P.; Krauss,S.; Webby,R.J.; Feeroz,M.M.; Webster,R.G.
EPI1098861	HA	Bangladesh	2016-Sep-27	EPI_ISL_284804	A/duck/Bangladesh/30815/2016		Import from public-domain	Barman,S.; Turner,J.C.; Hasan,M.K.; Akhtar,S.; Franks,J.; El-Shesheny,R.; Walker,D.; Seiler,P.; Friedman,K.; Kercher,L.; Kayali,G.; Jones-Engel,L.; McKenzie,P.; Krauss,S.; Webby,R.J.; Feeroz,M.M.; Webster,R.G.
EPI1099126	HA	Bangladesh	2016-Oct-24	EPI_ISL_284807	A/duck/Bangladesh/31095/2016		Import from public-domain	Barman,S.; Turner,J.C.; Hasan,M.K.; Akhtar,S.; Franks,J.; El-Shesheny,R.; Walker,D.; Seiler,P.; Friedman,K.; Kercher,L.; Kayali,G.; Jones-Engel,L.; McKenzie,P.; Krauss,S.; Webby,R.J.; Feeroz,M.M.; Webster,R.G.
EPI1099150	HA	Bangladesh	2016-Sep-27	EPI_ISL_284808	A/duck/Bangladesh/30821/2016		Import from public-domain	Barman,S.; Turner,J.C.; Hasan,M.K.; Akhtar,S.; Franks,J.; El-Shesheny,R.; Walker,D.; Seiler,P.; Friedman,K.; Kercher,L.; Kayali,G.; Jones-Engel,L.; McKenzie,P.; Krauss,S.; Webby,R.J.; Feeroz,M.M.; Webster,R.G.
EPI1099121	HA	Bangladesh	2016-Oct-24	EPI_ISL_284812	A/duck/Bangladesh/31023/2016		Import from public-domain	Barman,S.; Turner,J.C.; Hasan,M.K.; Akhtar,S.; Franks,J.; El-Shesheny,R.; Walker,D.; Seiler,P.; Friedman,K.; Kercher,L.; Kayali,G.; Jones-Engel,L.; McKenzie,P.; Krauss,S.; Webby,R.J.; Feeroz,M.M.; Webster,R.G.
EPI1098942	HA	Bangladesh	2016-Oct-24	EPI_ISL_284813	A/duck/Bangladesh/31103/2016		Import from public-domain	Barman,S.; Turner,J.C.; Hasan,M.K.; Akhtar,S.; Franks,J.; El-Shesheny,R.; Walker,D.; Seiler,P.; Friedman,K.; Kercher,L.; Kayali,G.; Jones-Engel,L.; McKenzie,P.; Krauss,S.; Webby,R.J.; Feeroz,M.M.; Webster,R.G.
EPI1151480	HA	Japan	2016-Dec-20	EPI_ISL_293482	A/chicken/Miyazaki/21/2016		Import from public-domain	Soda,K.; Usui,T.; Ito,H.; Ozaki,H.; Yamaguchi,T.; Ito,T.
EPI1151488	HA	Japan	2016-Dec-26	EPI_ISL_293483	A/chicken/Kumamoto/45/2016		Import from public-domain	Soda,K.; Usui,T.; Ito,H.; Ozaki,H.; Yamaguchi,T.; Ito,T.
EPI1151552	HA	Japan	2016-Dec-14	EPI_ISL_293498	A/northern goshawk/Mie/2412C007/2016		Import from public-domain	Soda,K.; Usui,T.; Ito,H.; Ozaki,H.; Yamaguchi,T.; Ito,T.
EPI1151560	HA	Japan	2016-Dec-22	EPI_ISL_293499	A/peregrine falcon/Nagasaki/4212A005/2016		Import from public-domain	Soda,K.; Usui,T.; Ito,H.; Ozaki,H.; Yamaguchi,T.; Ito,T.
EPI1151568	HA	Japan	2016-Dec-28	EPI_ISL_293500	A/tufted duck/Hyogo/2812A009/2016		Import from public-domain	Soda,K.; Usui,T.; Ito,H.; Ozaki,H.; Yamaguchi,T.; Ito,T.
EPI1151576	HA	Japan	2017-Jan-03	EPI_ISL_293501	A/wigeon/Aichi/2301H025/2017		Import from public-domain	Soda,K.; Usui,T.; Ito,H.; Ozaki,H.; Yamaguchi,T.; Ito,T.
EPI1151584	HA	Japan	2017-Jan-04	EPI_ISL_293502	A/common porchard/Aichi/2301N017/2017		Import from public-domain	Soda,K.; Usui,T.; Ito,H.; Ozaki,H.; Yamaguchi,T.; Ito,T.
EPI1151592	HA	Japan	2017-Jan-09	EPI_ISL_293503	A/common porchard/Yamaguchi/3501B002/2017		Import from public-domain	Soda,K.; Usui,T.; Ito,H.; Ozaki,H.; Yamaguchi,T.; Ito,T.
EPI1151600	HA	Japan	2017-Jan-13	EPI_ISL_293504	A/mute swan/Hyogo/2801ITM001/2017		Import from public-domain	Soda,K.; Usui,T.; Ito,H.; Ozaki,H.; Yamaguchi,T.; Ito,T.
EPI1151605	HA	Japan	2017-Jan-04	EPI_ISL_293505	A/coot/Shiga/2501T010/2017		Import from public-domain	Soda,K.; Usui,T.; Ito,H.; Ozaki,H.; Yamaguchi,T.; Ito,T.
EPI1169750	HA	China	2015-Nov-11	EPI_ISL_297324	A/White-eyed Pochard/Ningxia/473-8/2015		Import from public-domain	Lu,S.; Zhao,Z.; Zhang,J.; Wang,W.; He,X.; Yu,M.; Zhang,C.; Li,X.; Guo,Z.; Yang,X.; Liu,L.; Zhi,M.; Fu,T.; Lv,X.; Ma,W.; Liao,M.; Chai,H.; Qian,J.; Ma,J.; Jin,H.; Hua,Y.
EPI1169758	HA	China	2015-Nov-11	EPI_ISL_297325	A/White-eyed Pochard/Ningxia/477-14/2015		Import from public-domain	Lu,S.; Zhao,Z.; Zhang,J.; Wang,W.; He,X.; Yu,M.; Zhang,C.; Li,X.; Guo,Z.; Yang,X.; Liu,L.; Zhi,M.; Fu,T.; Lv,X.; Ma,W.; Liao,M.; Chai,H.; Qian,J.; Ma,J.; Jin,H.; Hua,Y.
EPI1169767	HA	China	2015-Nov-11	EPI_ISL_297326	A/White-eyed Pochard/Ningxia/479-16/2015		Import from public-domain	Lu,S.; Zhao,Z.; Zhang,J.; Wang,W.; He,X.; Yu,M.; Zhang,C.; Li,X.; Guo,Z.; Yang,X.; Liu,L.; Zhi,M.; Fu,T.; Lv,X.; Ma,W.; Liao,M.; Chai,H.; Qian,J.; Ma,J.; Jin,H.; Hua,Y.
EPI1169774	HA	China	2015-Nov-11	EPI_ISL_297327	A/White-eyed Pochard/Ningxia/480-17/2015		Import from public-domain	Lu,S.; Zhao,Z.; Zhang,J.; Wang,W.; He,X.; Yu,M.; Zhang,C.; Li,X.; Guo,Z.; Yang,X.; Liu,L.; Zhi,M.; Fu,T.; Lv,X.; Ma,W.; Liao,M.; Chai,H.; Qian,J.; Ma,J.; Jin,H.; Hua,Y.
EPI1226488	HA	Vietnam	2015-Dec-01	EPI_ISL_309199	A/quail/Vietnam/CVVI-01/2015		Import from public-domain	Hien,D.T.; Kim,W.
EPI1226495	HA	Vietnam	2015-Dec-01	EPI_ISL_309200	A/quail/Vietnam/CVVI-03/2015		Import from public-domain	Hien,D.T.; Kim,W.
EPI1335790	HA	Vietnam	2016-Feb-13	EPI_ISL_333975	A/chicken/Vietnam/NCVD-16A26/2016	National Centre of Veterinary Diagnostics	Centers for Disease Control and Prevention
EPI1435113	HA	China	2016-May-21	EPI_ISL_354553	A/Duck/Jiangxi/50455/2016	WHO Chinese National Influenza Center	WHO Chinese National Influenza Center	Xiaoxu,Zeng;Xiyan,Li;Weijuan,Huang;Lei,Yang;Dayan,Wang;Yuelong,Shu
EPI1435137	HA	China	2016-May-20	EPI_ISL_354556	A/Duck/Jiangxi/50446/2016	WHO Chinese National Influenza Center	WHO Chinese National Influenza Center	Xiaoxu,Zeng;Xiyan,Li;Weijuan,Huang;Lei,Yang;Dayan,Wang;Yuelong,Shu
EPI1435169	HA	China	2016-Feb-29	EPI_ISL_354560	A/Chicken/Jiangxi/45153/2016	WHO Chinese National Influenza Center	WHO Chinese National Influenza Center	Xiaoxu,Zeng;Xiyan,Li;Weijuan,Huang;Lei,Yang;Dayan,Wang;Yuelong,Shu
EPI1435185	HA	China	2016-Jan-19	EPI_ISL_354562	A/Chicken/Jiangxi/45093/2016	WHO Chinese National Influenza Center	WHO Chinese National Influenza Center	Xiaoxu,Zeng;Xiyan,Li;Weijuan,Huang;Lei,Yang;Dayan,Wang;Yuelong,Shu
EPI1550914	HA	China	2016-Nov-23	EPI_ISL_378634	A/Whooper Swan/Sanmenxia/01/2016		Import from public-domain	Li,M.; Ma,J.; He,H.
EPI1555364	HA	Vietnam	2015-Nov-11	EPI_ISL_379568	A/muscovy duck/Vietnam/HU4-160/2015		Import from public-domain	Sakoda,Y.; Okamatsu,M.; Matsuno,K.; Chu,D.H.; Nguyen,L.T.; Jizou,M.
EPI1555831	HA	China	2016-Feb-02	EPI_ISL_379682	A/goose/China/1106/2016		Import from public-domain	Liu,K.; Gao,R.; Gu,M.; Li,J.; Shi,L.; Sun,W.; Liu,D.; Gao,Z.; Wang,X.; Hu,J.; Liu,X.; Hu,S.; Chen,S.; Gao,S.; Peng,D.; Jiao,X.A.
EPI1555832	HA	China	2016-Jan-01	EPI_ISL_379683	A/duck/China/YD1516/2016		Import from public-domain	Liu,K.; Gao,R.; Gu,M.; Li,J.; Shi,L.; Sun,W.; Liu,D.; Gao,Z.; Wang,X.; Hu,J.; Liu,X.; Hu,S.; Chen,S.; Gao,S.; Peng,D.; Jiao,X.A.
EPI1574305	HA	China	2016-Oct-01	EPI_ISL_386922	A/Luscinia cyane/Jiangxi/U2/2016 （H5N6）	Tsinghua University	Tsinghua University
EPI1574313	HA	China	2015-Oct-01	EPI_ISL_386923	A/Streptopelia decaocto/Jiangxi/E1/2015(H5N6)	Tsinghua University	Tsinghua University
EPI1574321	HA	China	2015-Oct-01	EPI_ISL_386924	A/Streptopelia decaocto/Jiangxi/J8/2015 （H5N6）	Tsinghua University	Tsinghua University
EPI1574329	HA	China	2015-Oct-01	EPI_ISL_386925	A/quail/Jiangxi/B9/2015 （H5N6）	Tsinghua University	Tsinghua University
EPI1576822	HA	Vietnam	2015-Jan-10	EPI_ISL_387351	A/duck/Viet Nam/HN-2431/2015		Import from public-domain	Tan,G.; Pickett,B.; Fedorova,N.; Amedeo,P.; Isom,R.; Hu,L.; Christensen,J.; Miller,J.; Durbin,A.; Williams,T.; Arumemi,F.; Kawaoka,Y.; Zhong,G.; Neumann,G.
EPI1576830	HA	Vietnam	2015-Oct-25	EPI_ISL_387352	A/duck/Viet Nam/HN-2512/2015		Import from public-domain	Tan,G.; Pickett,B.; Fedorova,N.; Amedeo,P.; Isom,R.; Hu,L.; Christensen,J.; Miller,J.; Durbin,A.; Williams,T.; Arumemi,F.; Kawaoka,Y.; Zhong,G.; Neumann,G.
EPI1576838	HA	Vietnam	2015-Oct-25	EPI_ISL_387353	A/duck/Viet Nam/HN-2520/2015		Import from public-domain	Tan,G.; Pickett,B.; Fedorova,N.; Amedeo,P.; Isom,R.; Hu,L.; Christensen,J.; Miller,J.; Durbin,A.; Williams,T.; Arumemi,F.; Kawaoka,Y.; Zhong,G.; Neumann,G.
EPI1576846	HA	Vietnam	2015-Oct-25	EPI_ISL_387354	A/duck/Viet Nam/HN-2522/2015		Import from public-domain	Tan,G.; Pickett,B.; Fedorova,N.; Amedeo,P.; Isom,R.; Hu,L.; Christensen,J.; Miller,J.; Durbin,A.; Williams,T.; Arumemi,F.; Kawaoka,Y.; Zhong,G.; Neumann,G.
EPI1576915	HA	Vietnam	2016-Jan-05	EPI_ISL_387362	A/duck/Viet Nam/QN-2624/2016		Import from public-domain	Tan,G.; Pickett,B.; Fedorova,N.; Amedeo,P.; Isom,R.; Hu,L.; Christensen,J.; Miller,J.; Durbin,A.; Williams,T.; Arumemi,F.; Kawaoka,Y.; Zhong,G.; Neumann,G.
EPI1594031	HA	Indonesia	2016-Jan-16	EPI_ISL_391469	A/chicken/East_Java/Av700/2016	Institute of Tropical Disease, Universitas Airlangga	Institute of Tropical Disease	AM,Nastri; AL,Poetranto; ED,Poetranto; SPA,Wahyuningsih; W,Darmanto; EF,Puruhito; L,Wulandari; G,Soegiarto; YK,Shimizu; Y,Mori; K,Shimizu
EPI1594039	HA	Indonesia	2016-Jan-15	EPI_ISL_391470	A/chicken/East_Java/Av678/2016	Institute of Tropical Disease, Universitas Airlangga	Institute of Tropical Disease	AM,Nastri; AL,Poetranto; ED,Poetranto; SPA,Wahyuningsih; W,Darmanto; EF,Puruhito; L,Wulandari; G,Soegiarto; YK,Shimizu; Y,Mori; K,Shimizu
EPI1594047	HA	Indonesia	2016-Jan-15	EPI_ISL_391471	A/chicken/East_Java/Av676/2016	Institute of Tropical Disease, Universitas Airlangga	Institute of Tropical Disease	AM,Nastri; AL,Poetranto; ED,Poetranto; SPA,Wahyuningsih; W,Darmanto; EF,Puruhito; L,Wulandari; G,Soegiarto; YK,Shimizu; Y,Mori; K,Shimizu
EPI1594331	HA	Indonesia	2016-Jan-16	EPI_ISL_391472	A/duck/East_Java/Av703/2016	Institute of Tropical Disease, Universitas Airlangga	Institute of Tropical Disease	AM,Nastri; AL,Poetranto; ED,Poetranto; SPA,Wahyuningsih; W,Darmanto; EF,Puruhito; L,Wulandari; G,Soegiarto; YK,Shimizu; Y,Mori; K,Shimizu
EPI1594339	HA	Indonesia	2016-Jan-16	EPI_ISL_391473	A/duck/East_Java/Av698/2016	Institute of Tropical Disease, Universitas Airlangga	Institute of Tropical Disease	AM,Nastri; AL,Poetranto; ED,Poetranto; SPA,Wahyuningsih; W,Darmanto; EF,Puruhito; L,Wulandari; G,Soegiarto; YK,Shimizu; Y,Mori; K,Shimizu
EPI1594347	HA	Indonesia	2016-Jan-16	EPI_ISL_391474	A/duck/East_Java/Av693/2016	Institute of Tropical Disease, Universitas Airlangga	Institute of Tropical Disease	AM,Nastri; AL,Poetranto; ED,Poetranto; SPA,Wahyuningsih; W,Darmanto; EF,Puruhito; L,Wulandari; G,Soegiarto; YK,Shimizu; Y,Mori; K,Shimizu
EPI1635158	HA	Bangladesh	2017-Jan-10	EPI_ISL_399754	A/chicken/Bangladesh/P17001/2017		Import from public-domain	Sarkar,S.; Hossain,M.E.; Uddin,M.K.; Uddin,M.M.; Ahmed,S.S.U.; Davis,T.; Kennedy,E.D.; Azziz-Baumgartner,E.
EPI1635159	HA	Bangladesh	2017-Jan-10	EPI_ISL_399755	A/chicken/Bangladesh/P17002/2017		Import from public-domain	Sarkar,S.; Hossain,M.E.; Uddin,M.K.; Uddin,M.M.; Ahmed,S.S.U.; Davis,T.; Kennedy,E.D.; Azziz-Baumgartner,E.
EPI1635160	HA	Bangladesh	2017-Jan-10	EPI_ISL_399756	A/Duck/Bangladesh/P17003/2017		Import from public-domain	Sarkar,S.; Hossain,M.E.; Uddin,M.K.; Uddin,M.M.; Ahmed,S.S.U.; Davis,T.; Kennedy,E.D.; Azziz-Baumgartner,E.
EPI1635161	HA	Bangladesh	2017-Jan-10	EPI_ISL_399757	A/chicken/Bangladesh/P17006/2017		Import from public-domain	Sarkar,S.; Hossain,M.E.; Uddin,M.K.; Uddin,M.M.; Ahmed,S.S.U.; Davis,T.; Kennedy,E.D.; Azziz-Baumgartner,E.
EPI1635162	HA	Bangladesh	2017-Jan-10	EPI_ISL_399758	A/chicken/Bangladesh/P17009/2017		Import from public-domain	Sarkar,S.; Hossain,M.E.; Uddin,M.K.; Uddin,M.M.; Ahmed,S.S.U.; Davis,T.; Kennedy,E.D.; Azziz-Baumgartner,E.
EPI1635163	HA	Bangladesh	2017-Jan-10	EPI_ISL_399759	A/chicken/Bangladesh/P17010/2017		Import from public-domain	Sarkar,S.; Hossain,M.E.; Uddin,M.K.; Uddin,M.M.; Ahmed,S.S.U.; Davis,T.; Kennedy,E.D.; Azziz-Baumgartner,E.
EPI1674427	HA	Indonesia	2015-Apr-11	EPI_ISL_407389	A/chicken/EastJava/VSN524/2015	Vaksindo Satwa Nusantara	PT. Vaksindo Satwa Nusantara
EPI1674428	HA	Indonesia	2015-Apr-11	EPI_ISL_407390	A/chicken/EastJava/VSN525/2015	Vaksindo Satwa Nusantara	PT. Vaksindo Satwa Nusantara
EPI1674429	HA	Indonesia	2015-Apr-11	EPI_ISL_407391	A/chicken/EastJava/VSN526/2015	Vaksindo Satwa Nusantara	PT. Vaksindo Satwa Nusantara
EPI1674430	HA	Indonesia	2015-Apr-28	EPI_ISL_407392	A/chicken/WestJava/VSN530/2015	Vaksindo Satwa Nusantara	PT. Vaksindo Satwa Nusantara
EPI1674431	HA	Indonesia	2015-Jun-10	EPI_ISL_407393	A/chickenEastJava/VSN532/2015	Vaksindo Satwa Nusantara	PT. Vaksindo Satwa Nusantara
EPI1674432	HA	Indonesia	2015-May-29	EPI_ISL_407394	A/chicken/Banten/VSN543/2015	Vaksindo Satwa Nusantara	PT. Vaksindo Satwa Nusantara
EPI1674433	HA	Indonesia	2015-Jul-09	EPI_ISL_407395	A/chicken/WestJava/VSN555/2015	Vaksindo Satwa Nusantara	PT. Vaksindo Satwa Nusantara
EPI1674434	HA	Indonesia	2015-Jul-10	EPI_ISL_407396	A/chicken/CentralJava/VSN556/2015	Vaksindo Satwa Nusantara	PT. Vaksindo Satwa Nusantara
EPI1674436	HA	Indonesia	2015-Sep-05	EPI_ISL_407398	A/chicken/Lampung/VSN560/2015	Vaksindo Satwa Nusantara	PT. Vaksindo Satwa Nusantara
EPI1674437	HA	Indonesia	2015-Sep-28	EPI_ISL_407399	A/chicken/NorthSumatra/VSN566/2015	Vaksindo Satwa Nusantara	PT. Vaksindo Satwa Nusantara
EPI1674438	HA	Indonesia	2015-Oct-05	EPI_ISL_407400	A/chicken/WestJava/570/2015	Vaksindo Satwa Nusantara	PT. Vaksindo Satwa Nusantara
EPI1674439	HA	Indonesia	2015-Nov-18	EPI_ISL_407401	A/chicken/Banten/VSN579/2015	Vaksindo Satwa Nusantara	PT. Vaksindo Satwa Nusantara
EPI1674440	HA	Indonesia	2016-Feb-01	EPI_ISL_407402	A/chicken/WestJava/VSN590/2016	Vaksindo Satwa Nusantara	PT. Vaksindo Satwa Nusantara
EPI1674441	HA	Indonesia	2016-Mar-10	EPI_ISL_407403	A/chicken/WestJava/VSN592/2016	Vaksindo Satwa Nusantara	PT. Vaksindo Satwa Nusantara
EPI1674442	HA	Indonesia	2016-Feb-25	EPI_ISL_407404	A/chicken/WestJava/VSN593/2016	Vaksindo Satwa Nusantara	PT. Vaksindo Satwa Nusantara
EPI1674443	HA	Indonesia	2016-Mar-16	EPI_ISL_407405	A/chicken/WestJava/VSN594/2016	Vaksindo Satwa Nusantara	PT. Vaksindo Satwa Nusantara
EPI1674444	HA	Indonesia	2016-Jan-25	EPI_ISL_407406	A/chicken/WestJava/VSN595/2016	Vaksindo Satwa Nusantara	PT. Vaksindo Satwa Nusantara
EPI1674445	HA	Indonesia	2016-Feb-25	EPI_ISL_407407	A/chicken/WestJava/VSN596/2016	Vaksindo Satwa Nusantara	PT. Vaksindo Satwa Nusantara
EPI1674446	HA	Indonesia	2016-Mar-02	EPI_ISL_407408	A/chicken/WestJava/VSN599/2016	Vaksindo Satwa Nusantara	PT. Vaksindo Satwa Nusantara
EPI1674447	HA	Indonesia	2016-Feb-22	EPI_ISL_407409	A/chicken/WestJava/VSN600/2016	Vaksindo Satwa Nusantara	PT. Vaksindo Satwa Nusantara
EPI1674448	HA	Indonesia	2016-Mar-02	EPI_ISL_407410	A/chicken/WestJava/VSN601/2016	Vaksindo Satwa Nusantara	PT. Vaksindo Satwa Nusantara
EPI1674449	HA	Indonesia	2016-Mar-02	EPI_ISL_407411	A/duck/EastJava/VSN605/2016	Vaksindo Satwa Nusantara	PT. Vaksindo Satwa Nusantara
EPI1674450	HA	Indonesia	2016-Mar-11	EPI_ISL_407412	A/chicken/Lampung/VSN609/2016	Vaksindo Satwa Nusantara	PT. Vaksindo Satwa Nusantara
EPI1674451	HA	Indonesia	2016-Mar-21	EPI_ISL_407413	A/chicken/CentralJava/VSN612/2016	Vaksindo Satwa Nusantara	PT. Vaksindo Satwa Nusantara
EPI1674452	HA	Indonesia	2016-Mar-21	EPI_ISL_407414	A/quail/Lampung/VSN613/2016	Vaksindo Satwa Nusantara	PT. Vaksindo Satwa Nusantara
EPI1674453	HA	Indonesia	2016-Mar-23	EPI_ISL_407415	A/chicken/Lampung/VSN614/2016	Vaksindo Satwa Nusantara	PT. Vaksindo Satwa Nusantara
EPI1674454	HA	Indonesia	2016-Mar-28	EPI_ISL_407416	A/chicken/Lampung/VSN615/2016	Vaksindo Satwa Nusantara	PT. Vaksindo Satwa Nusantara
EPI1674455	HA	Indonesia	2016-Mar-29	EPI_ISL_407417	A/chicken/WestJava/VSN618/2016	Vaksindo Satwa Nusantara	PT. Vaksindo Satwa Nusantara
EPI1674456	HA	Indonesia	2016-Mar-31	EPI_ISL_407418	A/chicken/Banten/VSN620/2016	Vaksindo Satwa Nusantara	PT. Vaksindo Satwa Nusantara
EPI1674457	HA	Indonesia	2016-Mar-31	EPI_ISL_407419	A/chicken/EastJava/VSN621/2016	Vaksindo Satwa Nusantara	PT. Vaksindo Satwa Nusantara
EPI1674458	HA	Indonesia	2016-Mar-16	EPI_ISL_407420	A/chicken/WestJava/VSN622/2016	Vaksindo Satwa Nusantara	PT. Vaksindo Satwa Nusantara
EPI1674459	HA	Indonesia	2016-Mar-31	EPI_ISL_407421	A/chicken/Lampung/VSN624/2016	Vaksindo Satwa Nusantara	PT. Vaksindo Satwa Nusantara
EPI1674460	HA	Indonesia	2016-Mar-31	EPI_ISL_407422	A/chicken/WestJava/VSN626/2016	Vaksindo Satwa Nusantara	PT. Vaksindo Satwa Nusantara
EPI1674461	HA	Indonesia	2016-Apr-25	EPI_ISL_407423	A/chicken/WestJava/VSN633/2016	Vaksindo Satwa Nusantara	PT. Vaksindo Satwa Nusantara
EPI1674462	HA	Indonesia	2016-Jun-09	EPI_ISL_407424	A/quail/EastJava/VSN634/2016	Vaksindo Satwa Nusantara	PT. Vaksindo Satwa Nusantara
EPI1674463	HA	Indonesia	2016-Jun-01	EPI_ISL_407425	A/chicken/WestJava/VSN638/2016	Vaksindo Satwa Nusantara	PT. Vaksindo Satwa Nusantara
EPI1674464	HA	Indonesia	2016-Jun-01	EPI_ISL_407426	A/chicken/WestJava/VSN639/2016	Vaksindo Satwa Nusantara	PT. Vaksindo Satwa Nusantara
EPI1674465	HA	Indonesia	2016-May-19	EPI_ISL_407427	A/chicken/CentralJava/VSN641/2016	Vaksindo Satwa Nusantara	PT. Vaksindo Satwa Nusantara
EPI1674466	HA	Indonesia	2016-May-19	EPI_ISL_407428	A/chicken/WestJava/VSN642/2016	Vaksindo Satwa Nusantara	PT. Vaksindo Satwa Nusantara
EPI1674467	HA	Indonesia	2016-Jun-08	EPI_ISL_407429	A/quail/EastJava/VSN643/2016	Vaksindo Satwa Nusantara	PT. Vaksindo Satwa Nusantara
EPI1674468	HA	Indonesia	2016-Jun-08	EPI_ISL_407430	A/chicken/Lampung/644/2016	Vaksindo Satwa Nusantara	PT. Vaksindo Satwa Nusantara
EPI1674469	HA	Indonesia	2016-Jul-25	EPI_ISL_407431	A/chicken/Lampung/VSN648/2016	Vaksindo Satwa Nusantara	PT. Vaksindo Satwa Nusantara
EPI1674470	HA	Indonesia	2016-Jul-25	EPI_ISL_407432	A/chicken/WestJava/VSN658/2016	Vaksindo Satwa Nusantara	PT. Vaksindo Satwa Nusantara
EPI1674471	HA	Indonesia	2016-Aug-04	EPI_ISL_407433	A/chicken/WestJava/VSN660/2016	Vaksindo Satwa Nusantara	PT. Vaksindo Satwa Nusantara
EPI1674472	HA	Indonesia	2016-Aug-22	EPI_ISL_407434	A/duck/WestJava/VSN661/2016	Vaksindo Satwa Nusantara	PT. Vaksindo Satwa Nusantara
EPI1674473	HA	Indonesia	2016-Aug-04	EPI_ISL_407435	A/chicken/WestJava/VSN662/2016	Vaksindo Satwa Nusantara	PT. Vaksindo Satwa Nusantara
EPI1674474	HA	Indonesia	2016-Sep-13	EPI_ISL_407436	A/chicken/WestJava/VSN664/2016	Vaksindo Satwa Nusantara	PT. Vaksindo Satwa Nusantara
EPI1674475	HA	Indonesia	2016-Oct-06	EPI_ISL_407437	A/duck/WestJava/VSN673/2016	Vaksindo Satwa Nusantara	PT. Vaksindo Satwa Nusantara
EPI1767964	HA	Bangladesh	2017-Jan-02	EPI_ISL_501440	A/chicken/Bangladesh/BDAMC-008-HA/2017		Import from public-domain	Islam,A.; Klaassen,M.; Hossain,M.E.; Samad,M.A.; Rahman,M.K.; Shano,S.; Rahman,M.Z.; Flora,M.S.
EPI1767965	HA	Bangladesh	2017-Jan-03	EPI_ISL_501441	A/chicken/Bangladesh/BDAMC-067-HA/2017		Import from public-domain	Islam,A.; Klaassen,M.; Hossain,M.E.; Samad,M.A.; Rahman,M.K.; Shano,S.; Rahman,M.Z.; Flora,M.S.
EPI1773260	HA	Kazakhstan	2015-Apr-24	EPI_ISL_502442	A/flamingo/Kazakhstan/6570/2015		Import from public-domain	Karamendin,K.; Kydyrmanov,A.; Kasymbekov,Y.; Daulbayeva,K.; Khan,E.; Sayatov,M.; Seidalina,A.
EPI1833479	HA	China	2016-Dec-01	EPI_ISL_707363	A/chicken/Shanxi/12.01_TGYL014-C/2016		Import from public-domain	Bi,Y.; Li,J.; Li,S.; Fu,G.; Jin,T.; Zhang,C.; Yang,Y.; Ma,Z.; Tian,W.; Xiao,S.; Li,L.; Yin,R.; Zhang,Y.; Wang,L.; Qin,Y.; Yao,Z.; Meng,F.; Hu,D.; Li,D.; Wong,G.; Liu,F.; Lv,N.; Fu,L.; Peng,Y.; Ma,J.; Sharshov,K.; Shestopalov,A.; Gulyaeva,M.; Gao,G.F.; Chen,J.; Shi,Y.; Liu,W.J.; Chu,D.; Huang,Y.; Liu,Y.; Liu,L.; Chen,Q.; Shi,W.
EPI1833687	HA	China	2017-Jan-17	EPI_ISL_707384	A/duck/Fujian/1.17_FZHX0123-C/2017		Import from public-domain	Bi,Y.; Li,J.; Li,S.; Fu,G.; Jin,T.; Zhang,C.; Yang,Y.; Ma,Z.; Tian,W.; Xiao,S.; Li,L.; Yin,R.; Zhang,Y.; Wang,L.; Qin,Y.; Yao,Z.; Meng,F.; Hu,D.; Li,D.; Wong,G.; Liu,F.; Lv,N.; Fu,L.; Peng,Y.; Ma,J.; Sharshov,K.; Shestopalov,A.; Gulyaeva,M.; Gao,G.F.; Chen,J.; Shi,Y.; Liu,W.J.; Chu,D.; Huang,Y.; Liu,Y.; Liu,L.; Chen,Q.; Shi,W.
EPI1834007	HA	China	2016-Nov-03	EPI_ISL_707421	A/duck/Fujian/11.3_FZHX1132-O/2016		Import from public-domain	Bi,Y.; Li,J.; Li,S.; Fu,G.; Jin,T.; Zhang,C.; Yang,Y.; Ma,Z.; Tian,W.; Xiao,S.; Li,L.; Yin,R.; Zhang,Y.; Wang,L.; Qin,Y.; Yao,Z.; Meng,F.; Hu,D.; Li,D.; Wong,G.; Liu,F.; Lv,N.; Fu,L.; Peng,Y.; Ma,J.; Sharshov,K.; Shestopalov,A.; Gulyaeva,M.; Gao,G.F.; Chen,J.; Shi,Y.; Liu,W.J.; Chu,D.; Huang,Y.; Liu,Y.; Liu,L.; Chen,Q.; Shi,W.
EPI1834015	HA	China	2016-Nov-03	EPI_ISL_707422	A/duck/Fujian/11.3_FZHX1141-C/2016		Import from public-domain	Bi,Y.; Li,J.; Li,S.; Fu,G.; Jin,T.; Zhang,C.; Yang,Y.; Ma,Z.; Tian,W.; Xiao,S.; Li,L.; Yin,R.; Zhang,Y.; Wang,L.; Qin,Y.; Yao,Z.; Meng,F.; Hu,D.; Li,D.; Wong,G.; Liu,F.; Lv,N.; Fu,L.; Peng,Y.; Ma,J.; Sharshov,K.; Shestopalov,A.; Gulyaeva,M.; Gao,G.F.; Chen,J.; Shi,Y.; Liu,W.J.; Chu,D.; Huang,Y.; Liu,Y.; Liu,L.; Chen,Q.; Shi,W.
EPI1834039	HA	China	2016-Dec-07	EPI_ISL_707425	A/duck/Fujian/12.7_FZHX1202-O/2016		Import from public-domain	Bi,Y.; Li,J.; Li,S.; Fu,G.; Jin,T.; Zhang,C.; Yang,Y.; Ma,Z.; Tian,W.; Xiao,S.; Li,L.; Yin,R.; Zhang,Y.; Wang,L.; Qin,Y.; Yao,Z.; Meng,F.; Hu,D.; Li,D.; Wong,G.; Liu,F.; Lv,N.; Fu,L.; Peng,Y.; Ma,J.; Sharshov,K.; Shestopalov,A.; Gulyaeva,M.; Gao,G.F.; Chen,J.; Shi,Y.; Liu,W.J.; Chu,D.; Huang,Y.; Liu,Y.; Liu,L.; Chen,Q.; Shi,W.
EPI1834047	HA	China	2016-Dec-07	EPI_ISL_707426	A/duck/Fujian/12.7_FZHX1218-C/2016		Import from public-domain	Bi,Y.; Li,J.; Li,S.; Fu,G.; Jin,T.; Zhang,C.; Yang,Y.; Ma,Z.; Tian,W.; Xiao,S.; Li,L.; Yin,R.; Zhang,Y.; Wang,L.; Qin,Y.; Yao,Z.; Meng,F.; Hu,D.; Li,D.; Wong,G.; Liu,F.; Lv,N.; Fu,L.; Peng,Y.; Ma,J.; Sharshov,K.; Shestopalov,A.; Gulyaeva,M.; Gao,G.F.; Chen,J.; Shi,Y.; Liu,W.J.; Chu,D.; Huang,Y.; Liu,Y.; Liu,L.; Chen,Q.; Shi,W.
EPI1834055	HA	China	2016-Dec-07	EPI_ISL_707427	A/duck/Fujian/12.7_FZHX1219-O/2016		Import from public-domain	Bi,Y.; Li,J.; Li,S.; Fu,G.; Jin,T.; Zhang,C.; Yang,Y.; Ma,Z.; Tian,W.; Xiao,S.; Li,L.; Yin,R.; Zhang,Y.; Wang,L.; Qin,Y.; Yao,Z.; Meng,F.; Hu,D.; Li,D.; Wong,G.; Liu,F.; Lv,N.; Fu,L.; Peng,Y.; Ma,J.; Sharshov,K.; Shestopalov,A.; Gulyaeva,M.; Gao,G.F.; Chen,J.; Shi,Y.; Liu,W.J.; Chu,D.; Huang,Y.; Liu,Y.; Liu,L.; Chen,Q.; Shi,W.
EPI1834063	HA	China	2016-Dec-07	EPI_ISL_707428	A/duck/Fujian/12.7_FZHX1221-C/2016		Import from public-domain	Bi,Y.; Li,J.; Li,S.; Fu,G.; Jin,T.; Zhang,C.; Yang,Y.; Ma,Z.; Tian,W.; Xiao,S.; Li,L.; Yin,R.; Zhang,Y.; Wang,L.; Qin,Y.; Yao,Z.; Meng,F.; Hu,D.; Li,D.; Wong,G.; Liu,F.; Lv,N.; Fu,L.; Peng,Y.; Ma,J.; Sharshov,K.; Shestopalov,A.; Gulyaeva,M.; Gao,G.F.; Chen,J.; Shi,Y.; Liu,W.J.; Chu,D.; Huang,Y.; Liu,Y.; Liu,L.; Chen,Q.; Shi,W.
EPI1890909	HA	Taiwan	2015-Apr-23	EPI_ISL_4032194	A/chicken/Changhua/15040036-1/2015		Import from public-domain	Huang,C.W.; Chen,L.H.; Lee,D.H.; Liu,Y.P.; Li,W.C.; Lee,M.S.; Chen,Y.P.; Lee,F.; Chiou,C.J.; Lin,Y.J.; Lin,Y.-J.
EPI1890917	HA	Taiwan	2015-Apr-23	EPI_ISL_4032195	A/chicken/Changhua/15040043-1/2015		Import from public-domain	Huang,C.W.; Chen,L.H.; Lee,D.H.; Liu,Y.P.; Li,W.C.; Lee,M.S.; Chen,Y.P.; Lee,F.; Chiou,C.J.; Lin,Y.J.; Lin,Y.-J.
EPI1890925	HA	Taiwan	2015-Apr-23	EPI_ISL_4032196	A/chicken/Changhua/15040037-2/2015		Import from public-domain	Huang,C.W.; Chen,L.H.; Lee,D.H.; Liu,Y.P.; Li,W.C.; Lee,M.S.; Chen,Y.P.; Lee,F.; Chiou,C.J.; Lin,Y.J.; Lin,Y.-J.
EPI1890933	HA	Taiwan	2015-Apr-24	EPI_ISL_4032197	A/chicken/Changhua/15040042/2015		Import from public-domain	Huang,C.W.; Chen,L.H.; Lee,D.H.; Liu,Y.P.; Li,W.C.; Lee,M.S.; Chen,Y.P.; Lee,F.; Chiou,C.J.; Lin,Y.J.; Lin,Y.-J.
EPI1890941	HA	Taiwan	2015-May-05	EPI_ISL_4032198	A/chicken/Changhua/15050013-1/2015		Import from public-domain	Huang,C.W.; Chen,L.H.; Lee,D.H.; Liu,Y.P.; Li,W.C.; Lee,M.S.; Chen,Y.P.; Lee,F.; Chiou,C.J.; Lin,Y.J.; Lin,Y.-J.
EPI1890949	HA	Taiwan	2015-May-16	EPI_ISL_4032199	A/chicken/Changhua/15050038-1/2015		Import from public-domain	Huang,C.W.; Chen,L.H.; Lee,D.H.; Liu,Y.P.; Li,W.C.; Lee,M.S.; Chen,Y.P.; Lee,F.; Chiou,C.J.; Lin,Y.J.; Lin,Y.-J.
EPI1890957	HA	Taiwan	2015-Jun-19	EPI_ISL_4032200	A/chicken/Changhua/15060027-2/2015		Import from public-domain	Huang,C.W.; Chen,L.H.; Lee,D.H.; Liu,Y.P.; Li,W.C.; Lee,M.S.; Chen,Y.P.; Lee,F.; Chiou,C.J.; Lin,Y.J.; Lin,Y.-J.
EPI1890965	HA	Taiwan	2015-Jun-20	EPI_ISL_4032201	A/chicken/Changhua/15060029/2015		Import from public-domain	Huang,C.W.; Chen,L.H.; Lee,D.H.; Liu,Y.P.; Li,W.C.; Lee,M.S.; Chen,Y.P.; Lee,F.; Chiou,C.J.; Lin,Y.J.; Lin,Y.-J.
EPI1890973	HA	Taiwan	2015-Jun-25	EPI_ISL_4032202	A/chicken/Changhua/15060037-1/2015		Import from public-domain	Huang,C.W.; Chen,L.H.; Lee,D.H.; Liu,Y.P.; Li,W.C.; Lee,M.S.; Chen,Y.P.; Lee,F.; Chiou,C.J.; Lin,Y.J.; Lin,Y.-J.
EPI1890981	HA	Taiwan	2015-Dec-07	EPI_ISL_4032203	A/chicken/Changhua/15120008/2015		Import from public-domain	Huang,C.W.; Chen,L.H.; Lee,D.H.; Liu,Y.P.; Li,W.C.; Lee,M.S.; Chen,Y.P.; Lee,F.; Chiou,C.J.; Lin,Y.J.; Lin,Y.-J.
EPI1890989	HA	Taiwan	2016-Jan-29	EPI_ISL_4032204	A/chicken/Changhua/16010060-2/2016		Import from public-domain	Huang,C.W.; Chen,L.H.; Lee,D.H.; Liu,Y.P.; Li,W.C.; Lee,M.S.; Chen,Y.P.; Lee,F.; Chiou,C.J.; Lin,Y.J.; Lin,Y.-J.
EPI1890997	HA	Taiwan	2016-Feb-24	EPI_ISL_4032205	A/chicken/Changhua/16020042-2/2016		Import from public-domain	Huang,C.W.; Chen,L.H.; Lee,D.H.; Liu,Y.P.; Li,W.C.; Lee,M.S.; Chen,Y.P.; Lee,F.; Chiou,C.J.; Lin,Y.J.; Lin,Y.-J.
EPI1891037	HA	Taiwan	2015-Jan-17	EPI_ISL_4032213	A/chicken/Chiayi/15010287-2/2015		Import from public-domain	Huang,C.W.; Chen,L.H.; Lee,D.H.; Liu,Y.P.; Li,W.C.; Lee,M.S.; Chen,Y.P.; Lee,F.; Chiou,C.J.; Lin,Y.J.; Lin,Y.-J.
EPI1891045	HA	Taiwan	2015-Jan-20	EPI_ISL_4032214	A/chicken/Chiayi/15010409-2/2015		Import from public-domain	Huang,C.W.; Chen,L.H.; Lee,D.H.; Liu,Y.P.; Li,W.C.; Lee,M.S.; Chen,Y.P.; Lee,F.; Chiou,C.J.; Lin,Y.J.; Lin,Y.-J.
EPI1891053	HA	Taiwan	2015-Jan-21	EPI_ISL_4032215	A/chicken/Chiayi/15010454-1/2015		Import from public-domain	Huang,C.W.; Chen,L.H.; Lee,D.H.; Liu,Y.P.; Li,W.C.; Lee,M.S.; Chen,Y.P.; Lee,F.; Chiou,C.J.; Lin,Y.J.; Lin,Y.-J.
EPI1891085	HA	Taiwan	2016-Aug-17	EPI_ISL_4032219	A/chicken/Hsinchu/16080004-2/2016		Import from public-domain	Huang,C.W.; Chen,L.H.; Lee,D.H.; Liu,Y.P.; Li,W.C.; Lee,M.S.; Chen,Y.P.; Lee,F.; Chiou,C.J.; Lin,Y.J.; Lin,Y.-J.
EPI1891093	HA	Taiwan	2016-Jan-22	EPI_ISL_4032220	A/chicken/Kaohsiung/16010047/2016		Import from public-domain	Huang,C.W.; Chen,L.H.; Lee,D.H.; Liu,Y.P.; Li,W.C.; Lee,M.S.; Chen,Y.P.; Lee,F.; Chiou,C.J.; Lin,Y.J.; Lin,Y.-J.
EPI1891101	HA	Taiwan	2016-Feb-17	EPI_ISL_4032221	A/chicken/Kaohsiung/16020017-2/2016		Import from public-domain	Huang,C.W.; Chen,L.H.; Lee,D.H.; Liu,Y.P.; Li,W.C.; Lee,M.S.; Chen,Y.P.; Lee,F.; Chiou,C.J.; Lin,Y.J.; Lin,Y.-J.
EPI1891109	HA	Taiwan	2016-Apr-20	EPI_ISL_4032222	A/chicken/Kaohsiung/16040021-1/2016		Import from public-domain	Huang,C.W.; Chen,L.H.; Lee,D.H.; Liu,Y.P.; Li,W.C.; Lee,M.S.; Chen,Y.P.; Lee,F.; Chiou,C.J.; Lin,Y.J.; Lin,Y.-J.
EPI1891117	HA	Taiwan	2016-Jul-03	EPI_ISL_4032223	A/chicken/Kaohsiung/16070003/2016		Import from public-domain	Huang,C.W.; Chen,L.H.; Lee,D.H.; Liu,Y.P.; Li,W.C.; Lee,M.S.; Chen,Y.P.; Lee,F.; Chiou,C.J.; Lin,Y.J.; Lin,Y.-J.
EPI1891125	HA	Taiwan	2016-Dec-08	EPI_ISL_4032224	A/chicken/Kaohsiung/16120012/2016		Import from public-domain	Huang,C.W.; Chen,L.H.; Lee,D.H.; Liu,Y.P.; Li,W.C.; Lee,M.S.; Chen,Y.P.; Lee,F.; Chiou,C.J.; Lin,Y.J.; Lin,Y.-J.
EPI1891133	HA	Taiwan	2016-Dec-17	EPI_ISL_4032225	A/chicken/Kaohsiung/16120034/2016		Import from public-domain	Huang,C.W.; Chen,L.H.; Lee,D.H.; Liu,Y.P.; Li,W.C.; Lee,M.S.; Chen,Y.P.; Lee,F.; Chiou,C.J.; Lin,Y.J.; Lin,Y.-J.
EPI1891141	HA	Taiwan	2016-Apr-20	EPI_ISL_4032226	A/chicken/Kaohsiung/16MB0889/2016		Import from public-domain	Huang,C.W.; Chen,L.H.; Lee,D.H.; Liu,Y.P.; Li,W.C.; Lee,M.S.; Chen,Y.P.; Lee,F.; Chiou,C.J.; Lin,Y.J.; Lin,Y.-J.
EPI1891197	HA	Taiwan	2015-Jan-21	EPI_ISL_4032237	A/chicken/Miaoli/15010421-1/2015		Import from public-domain	Huang,C.W.; Chen,L.H.; Lee,D.H.; Liu,Y.P.; Li,W.C.; Lee,M.S.; Chen,Y.P.; Lee,F.; Chiou,C.J.; Lin,Y.J.; Lin,Y.-J.
EPI1891213	HA	Taiwan	2016-Nov-27	EPI_ISL_4032239	A/chicken/Nantou/16110023-1/2016		Import from public-domain	Huang,C.W.; Chen,L.H.; Lee,D.H.; Liu,Y.P.; Li,W.C.; Lee,M.S.; Chen,Y.P.; Lee,F.; Chiou,C.J.; Lin,Y.J.; Lin,Y.-J.
EPI1891221	HA	Taiwan	2016-Nov-24	EPI_ISL_4032240	A/chicken/New Taipei City/16110019-1/2016		Import from public-domain	Huang,C.W.; Chen,L.H.; Lee,D.H.; Liu,Y.P.; Li,W.C.; Lee,M.S.; Chen,Y.P.; Lee,F.; Chiou,C.J.; Lin,Y.J.; Lin,Y.-J.
EPI1891229	HA	Taiwan	2016-Nov-24	EPI_ISL_4032241	A/chicken/New Taipei City/16110020-2/2016		Import from public-domain	Huang,C.W.; Chen,L.H.; Lee,D.H.; Liu,Y.P.; Li,W.C.; Lee,M.S.; Chen,Y.P.; Lee,F.; Chiou,C.J.; Lin,Y.J.; Lin,Y.-J.
EPI1891291	HA	Taiwan	2015-May-02	EPI_ISL_4032264	A/chicken/Pingtung/15050006-1/2015		Import from public-domain	Huang,C.W.; Chen,L.H.; Lee,D.H.; Liu,Y.P.; Li,W.C.; Lee,M.S.; Chen,Y.P.; Lee,F.; Chiou,C.J.; Lin,Y.J.; Lin,Y.-J.
EPI1891299	HA	Taiwan	2016-Feb-11	EPI_ISL_4032266	A/chicken/Pingtung/16020009-3/2016		Import from public-domain	Huang,C.W.; Chen,L.H.; Lee,D.H.; Liu,Y.P.; Li,W.C.; Lee,M.S.; Chen,Y.P.; Lee,F.; Chiou,C.J.; Lin,Y.J.; Lin,Y.-J.
EPI1891346	HA	Taiwan	2015-Jan-20	EPI_ISL_4032272	A/chicken/Taichung/15010399/2015		Import from public-domain	Huang,C.W.; Chen,L.H.; Lee,D.H.; Liu,Y.P.; Li,W.C.; Lee,M.S.; Chen,Y.P.; Lee,F.; Chiou,C.J.; Lin,Y.J.; Lin,Y.-J.
EPI1891354	HA	Taiwan	2016-Apr-28	EPI_ISL_4032273	A/chicken/Taichung/16040032-3/2016		Import from public-domain	Huang,C.W.; Chen,L.H.; Lee,D.H.; Liu,Y.P.; Li,W.C.; Lee,M.S.; Chen,Y.P.; Lee,F.; Chiou,C.J.; Lin,Y.J.; Lin,Y.-J.
EPI1891362	HA	Taiwan	2016-May-27	EPI_ISL_4032274	A/chicken/Taichung/16050044-2/2016		Import from public-domain	Huang,C.W.; Chen,L.H.; Lee,D.H.; Liu,Y.P.; Li,W.C.; Lee,M.S.; Chen,Y.P.; Lee,F.; Chiou,C.J.; Lin,Y.J.; Lin,Y.-J.
EPI1891370	HA	Taiwan	2016-Nov-16	EPI_ISL_4032275	A/chicken/Taichung/16110017-3/2016		Import from public-domain	Huang,C.W.; Chen,L.H.; Lee,D.H.; Liu,Y.P.; Li,W.C.; Lee,M.S.; Chen,Y.P.; Lee,F.; Chiou,C.J.; Lin,Y.J.; Lin,Y.-J.
EPI1891378	HA	Taiwan	2015-Feb-18	EPI_ISL_4032276	A/chicken/Tainan/15020214/2015		Import from public-domain	Huang,C.W.; Chen,L.H.; Lee,D.H.; Liu,Y.P.; Li,W.C.; Lee,M.S.; Chen,Y.P.; Lee,F.; Chiou,C.J.; Lin,Y.J.; Lin,Y.-J.
EPI1891386	HA	Taiwan	2016-Apr-29	EPI_ISL_4032277	A/chicken/Tainan/16040035-1/2016		Import from public-domain	Huang,C.W.; Chen,L.H.; Lee,D.H.; Liu,Y.P.; Li,W.C.; Lee,M.S.; Chen,Y.P.; Lee,F.; Chiou,C.J.; Lin,Y.J.; Lin,Y.-J.
EPI1891450	HA	Taiwan	2016-Jun-23	EPI_ISL_4032285	A/chicken/Taipei/16060022-4/2016		Import from public-domain	Huang,C.W.; Chen,L.H.; Lee,D.H.; Liu,Y.P.; Li,W.C.; Lee,M.S.; Chen,Y.P.; Lee,F.; Chiou,C.J.; Lin,Y.J.; Lin,Y.-J.
EPI1891458	HA	Taiwan	2016-Jun-23	EPI_ISL_4032286	A/chicken/Taipei/16060023-1/2016		Import from public-domain	Huang,C.W.; Chen,L.H.; Lee,D.H.; Liu,Y.P.; Li,W.C.; Lee,M.S.; Chen,Y.P.; Lee,F.; Chiou,C.J.; Lin,Y.J.; Lin,Y.-J.
EPI1891466	HA	Taiwan	2016-Dec-09	EPI_ISL_4032287	A/chicken/Taipei/16120021/2016		Import from public-domain	Huang,C.W.; Chen,L.H.; Lee,D.H.; Liu,Y.P.; Li,W.C.; Lee,M.S.; Chen,Y.P.; Lee,F.; Chiou,C.J.; Lin,Y.J.; Lin,Y.-J.
EPI1891514	HA	Taiwan	2015-Feb-02	EPI_ISL_4032293	A/chicken/Yunlin/15020048-1/2015		Import from public-domain	Huang,C.W.; Chen,L.H.; Lee,D.H.; Liu,Y.P.; Li,W.C.; Lee,M.S.; Chen,Y.P.; Lee,F.; Chiou,C.J.; Lin,Y.J.; Lin,Y.-J.
EPI1891522	HA	Taiwan	2015-Mar-31	EPI_ISL_4032294	A/chicken/Yunlin/15040002-2/2015		Import from public-domain	Huang,C.W.; Chen,L.H.; Lee,D.H.; Liu,Y.P.; Li,W.C.; Lee,M.S.; Chen,Y.P.; Lee,F.; Chiou,C.J.; Lin,Y.J.; Lin,Y.-J.
EPI1891530	HA	Taiwan	2015-Apr-20	EPI_ISL_4032295	A/chicken/Yunlin/15040027/2015		Import from public-domain	Huang,C.W.; Chen,L.H.; Lee,D.H.; Liu,Y.P.; Li,W.C.; Lee,M.S.; Chen,Y.P.; Lee,F.; Chiou,C.J.; Lin,Y.J.; Lin,Y.-J.
EPI1891538	HA	Taiwan	2015-May-04	EPI_ISL_4032296	A/chicken/Yunlin/15050012/2015		Import from public-domain	Huang,C.W.; Chen,L.H.; Lee,D.H.; Liu,Y.P.; Li,W.C.; Lee,M.S.; Chen,Y.P.; Lee,F.; Chiou,C.J.; Lin,Y.J.; Lin,Y.-J.
EPI1891546	HA	Taiwan	2015-May-15	EPI_ISL_4032297	A/chicken/Yunlin/15050037-2/2015		Import from public-domain	Huang,C.W.; Chen,L.H.; Lee,D.H.; Liu,Y.P.; Li,W.C.; Lee,M.S.; Chen,Y.P.; Lee,F.; Chiou,C.J.; Lin,Y.J.; Lin,Y.-J.
EPI1891554	HA	Taiwan	2015-May-16	EPI_ISL_4032298	A/chicken/Yunlin/15050039-2/2015		Import from public-domain	Huang,C.W.; Chen,L.H.; Lee,D.H.; Liu,Y.P.; Li,W.C.; Lee,M.S.; Chen,Y.P.; Lee,F.; Chiou,C.J.; Lin,Y.J.; Lin,Y.-J.
EPI1891562	HA	Taiwan	2015-Jun-05	EPI_ISL_4032299	A/chicken/Yunlin/15060014-1/2015		Import from public-domain	Huang,C.W.; Chen,L.H.; Lee,D.H.; Liu,Y.P.; Li,W.C.; Lee,M.S.; Chen,Y.P.; Lee,F.; Chiou,C.J.; Lin,Y.J.; Lin,Y.-J.
EPI1891570	HA	Taiwan	2015-Aug-27	EPI_ISL_4032300	A/chicken/Yunlin/15080024/2015		Import from public-domain	Huang,C.W.; Chen,L.H.; Lee,D.H.; Liu,Y.P.; Li,W.C.; Lee,M.S.; Chen,Y.P.; Lee,F.; Chiou,C.J.; Lin,Y.J.; Lin,Y.-J.
EPI1891578	HA	Taiwan	2016-Jan-01	EPI_ISL_4032301	A/chicken/Yunlin/16010001-1/2016		Import from public-domain	Huang,C.W.; Chen,L.H.; Lee,D.H.; Liu,Y.P.; Li,W.C.; Lee,M.S.; Chen,Y.P.; Lee,F.; Chiou,C.J.; Lin,Y.J.; Lin,Y.-J.
EPI1891586	HA	Taiwan	2016-Jan-05	EPI_ISL_4032302	A/chicken/Yunlin/16010008-1/2016		Import from public-domain	Huang,C.W.; Chen,L.H.; Lee,D.H.; Liu,Y.P.; Li,W.C.; Lee,M.S.; Chen,Y.P.; Lee,F.; Chiou,C.J.; Lin,Y.J.; Lin,Y.-J.
EPI1891594	HA	Taiwan	2016-Feb-23	EPI_ISL_4032303	A/chicken/Yunlin/16020038/2016		Import from public-domain	Huang,C.W.; Chen,L.H.; Lee,D.H.; Liu,Y.P.; Li,W.C.; Lee,M.S.; Chen,Y.P.; Lee,F.; Chiou,C.J.; Lin,Y.J.; Lin,Y.-J.
EPI1891602	HA	Taiwan	2016-May-30	EPI_ISL_4032304	A/chicken/Yunlin/16050053/2016		Import from public-domain	Huang,C.W.; Chen,L.H.; Lee,D.H.; Liu,Y.P.; Li,W.C.; Lee,M.S.; Chen,Y.P.; Lee,F.; Chiou,C.J.; Lin,Y.J.; Lin,Y.-J.
EPI1891610	HA	Taiwan	2017-Jan-01	EPI_ISL_4032305	A/chicken/Yunlin/17010001/2017		Import from public-domain	Huang,C.W.; Chen,L.H.; Lee,D.H.; Liu,Y.P.; Li,W.C.; Lee,M.S.; Chen,Y.P.; Lee,F.; Chiou,C.J.; Lin,Y.J.; Lin,Y.-J.
EPI1891618	HA	Taiwan	2017-Jan-13	EPI_ISL_4032306	A/chicken/Yunlin/17010014/2017		Import from public-domain	Huang,C.W.; Chen,L.H.; Lee,D.H.; Liu,Y.P.; Li,W.C.; Lee,M.S.; Chen,Y.P.; Lee,F.; Chiou,C.J.; Lin,Y.J.; Lin,Y.-J.
EPI1891898	HA	Taiwan	2015-Feb-06	EPI_ISL_4032420	A/duck/Changhua/15A03431-1-20T/2015		Import from public-domain	Huang,C.W.; Chen,L.H.; Lee,D.H.; Liu,Y.P.; Li,W.C.; Lee,M.S.; Chen,Y.P.; Lee,F.; Chiou,C.J.; Lin,Y.J.; Lin,Y.-J.
EPI1891906	HA	Taiwan	2015-Feb-08	EPI_ISL_4032421	A/duck/Changhua/15A03473-1-20T/2015		Import from public-domain	Huang,C.W.; Chen,L.H.; Lee,D.H.; Liu,Y.P.; Li,W.C.; Lee,M.S.; Chen,Y.P.; Lee,F.; Chiou,C.J.; Lin,Y.J.; Lin,Y.-J.
EPI1891914	HA	Taiwan	2015-Aug-25	EPI_ISL_4032422	A/duck/Chiayi/15080023/2015		Import from public-domain	Huang,C.W.; Chen,L.H.; Lee,D.H.; Liu,Y.P.; Li,W.C.; Lee,M.S.; Chen,Y.P.; Lee,F.; Chiou,C.J.; Lin,Y.J.; Lin,Y.-J.
EPI1891922	HA	Taiwan	2015-Feb-17	EPI_ISL_4032423	A/duck/Hsinchu/15020216/2015		Import from public-domain	Huang,C.W.; Chen,L.H.; Lee,D.H.; Liu,Y.P.; Li,W.C.; Lee,M.S.; Chen,Y.P.; Lee,F.; Chiou,C.J.; Lin,Y.J.; Lin,Y.-J.
EPI1891930	HA	Taiwan	2015-Jan-16	EPI_ISL_4032424	A/duck/Kaohsiung/15010213/2015		Import from public-domain	Huang,C.W.; Chen,L.H.; Lee,D.H.; Liu,Y.P.; Li,W.C.; Lee,M.S.; Chen,Y.P.; Lee,F.; Chiou,C.J.; Lin,Y.J.; Lin,Y.-J.
EPI1891938	HA	Taiwan	2015-Feb-09	EPI_ISL_4032425	A/duck/Nantou/15A3437/2015		Import from public-domain	Huang,C.W.; Chen,L.H.; Lee,D.H.; Liu,Y.P.; Li,W.C.; Lee,M.S.; Chen,Y.P.; Lee,F.; Chiou,C.J.; Lin,Y.J.; Lin,Y.-J.
EPI1891954	HA	Taiwan	2015-Jan-13	EPI_ISL_4032427	A/duck/Pingtung/15010145/2015		Import from public-domain	Huang,C.W.; Chen,L.H.; Lee,D.H.; Liu,Y.P.; Li,W.C.; Lee,M.S.; Chen,Y.P.; Lee,F.; Chiou,C.J.; Lin,Y.J.; Lin,Y.-J.
EPI1891962	HA	Taiwan	2015-Jan-14	EPI_ISL_4032428	A/duck/Pingtung/15010157-1/2015		Import from public-domain	Huang,C.W.; Chen,L.H.; Lee,D.H.; Liu,Y.P.; Li,W.C.; Lee,M.S.; Chen,Y.P.; Lee,F.; Chiou,C.J.; Lin,Y.J.; Lin,Y.-J.
EPI1891970	HA	Taiwan	2015-Jan-14	EPI_ISL_4032429	A/duck/Pingtung/15010180/2015		Import from public-domain	Huang,C.W.; Chen,L.H.; Lee,D.H.; Liu,Y.P.; Li,W.C.; Lee,M.S.; Chen,Y.P.; Lee,F.; Chiou,C.J.; Lin,Y.J.; Lin,Y.-J.
EPI1891978	HA	Taiwan	2015-Jan-17	EPI_ISL_4032430	A/duck/Pingtung/15010444/2015		Import from public-domain	Huang,C.W.; Chen,L.H.; Lee,D.H.; Liu,Y.P.; Li,W.C.; Lee,M.S.; Chen,Y.P.; Lee,F.; Chiou,C.J.; Lin,Y.J.; Lin,Y.-J.
EPI1891986	HA	Taiwan	2015-Jan-21	EPI_ISL_4032431	A/duck/Pingtung/15010461-1/2015		Import from public-domain	Huang,C.W.; Chen,L.H.; Lee,D.H.; Liu,Y.P.; Li,W.C.; Lee,M.S.; Chen,Y.P.; Lee,F.; Chiou,C.J.; Lin,Y.J.; Lin,Y.-J.
EPI1891994	HA	Taiwan	2015-Dec-07	EPI_ISL_4032432	A/duck/Pingtung/15120006/2015		Import from public-domain	Huang,C.W.; Chen,L.H.; Lee,D.H.; Liu,Y.P.; Li,W.C.; Lee,M.S.; Chen,Y.P.; Lee,F.; Chiou,C.J.; Lin,Y.J.; Lin,Y.-J.
EPI1892002	HA	Taiwan	2015-Feb-06	EPI_ISL_4032433	A/duck/Pingtung/15A03399-1-10T/2015		Import from public-domain	Huang,C.W.; Chen,L.H.; Lee,D.H.; Liu,Y.P.; Li,W.C.; Lee,M.S.; Chen,Y.P.; Lee,F.; Chiou,C.J.; Lin,Y.J.; Lin,Y.-J.
EPI1892050	HA	Taiwan	2015-Jan-21	EPI_ISL_4032439	A/duck/Taichung/15010400-1/2015		Import from public-domain	Huang,C.W.; Chen,L.H.; Lee,D.H.; Liu,Y.P.; Li,W.C.; Lee,M.S.; Chen,Y.P.; Lee,F.; Chiou,C.J.; Lin,Y.J.; Lin,Y.-J.
EPI1892058	HA	Taiwan	2015-Jan-20	EPI_ISL_4032440	A/duck/Tainan/15010403/2015		Import from public-domain	Huang,C.W.; Chen,L.H.; Lee,D.H.; Liu,Y.P.; Li,W.C.; Lee,M.S.; Chen,Y.P.; Lee,F.; Chiou,C.J.; Lin,Y.J.; Lin,Y.-J.
EPI1892066	HA	Taiwan	2016-Jan-11	EPI_ISL_4032441	A/duck/Tainan/16010020-1/2016		Import from public-domain	Huang,C.W.; Chen,L.H.; Lee,D.H.; Liu,Y.P.; Li,W.C.; Lee,M.S.; Chen,Y.P.; Lee,F.; Chiou,C.J.; Lin,Y.J.; Lin,Y.-J.
EPI1892074	HA	Taiwan	2016-Jan-11	EPI_ISL_4032442	A/duck/Tainan/16010024-1/2016		Import from public-domain	Huang,C.W.; Chen,L.H.; Lee,D.H.; Liu,Y.P.; Li,W.C.; Lee,M.S.; Chen,Y.P.; Lee,F.; Chiou,C.J.; Lin,Y.J.; Lin,Y.-J.
EPI1892082	HA	Taiwan	2016-Jan-12	EPI_ISL_4032443	A/duck/Taoyuan/16010023-1/2016		Import from public-domain	Huang,C.W.; Chen,L.H.; Lee,D.H.; Liu,Y.P.; Li,W.C.; Lee,M.S.; Chen,Y.P.; Lee,F.; Chiou,C.J.; Lin,Y.J.; Lin,Y.-J.
EPI1892098	HA	Taiwan	2015-Jan-13	EPI_ISL_4032445	A/duck/Yunlin/15010115-2/2015		Import from public-domain	Huang,C.W.; Chen,L.H.; Lee,D.H.; Liu,Y.P.; Li,W.C.; Lee,M.S.; Chen,Y.P.; Lee,F.; Chiou,C.J.; Lin,Y.J.; Lin,Y.-J.
EPI1892106	HA	Taiwan	2015-Jan-16	EPI_ISL_4032446	A/duck/Yunlin/15010244-1/2015		Import from public-domain	Huang,C.W.; Chen,L.H.; Lee,D.H.; Liu,Y.P.; Li,W.C.; Lee,M.S.; Chen,Y.P.; Lee,F.; Chiou,C.J.; Lin,Y.J.; Lin,Y.-J.
EPI1892114	HA	Taiwan	2015-Jan-17	EPI_ISL_4032447	A/duck/Yunlin/15010277/2015		Import from public-domain	Huang,C.W.; Chen,L.H.; Lee,D.H.; Liu,Y.P.; Li,W.C.; Lee,M.S.; Chen,Y.P.; Lee,F.; Chiou,C.J.; Lin,Y.J.; Lin,Y.-J.
EPI1892122	HA	Taiwan	2015-Jan-18	EPI_ISL_4032448	A/duck/Yunlin/15010310-4/2015		Import from public-domain	Huang,C.W.; Chen,L.H.; Lee,D.H.; Liu,Y.P.; Li,W.C.; Lee,M.S.; Chen,Y.P.; Lee,F.; Chiou,C.J.; Lin,Y.J.; Lin,Y.-J.
EPI1892130	HA	Taiwan	2015-Jan-18	EPI_ISL_4032449	A/duck/Yunlin/15010318-2/2015		Import from public-domain	Huang,C.W.; Chen,L.H.; Lee,D.H.; Liu,Y.P.; Li,W.C.; Lee,M.S.; Chen,Y.P.; Lee,F.; Chiou,C.J.; Lin,Y.J.; Lin,Y.-J.
EPI1892138	HA	Taiwan	2015-Jan-20	EPI_ISL_4032468	A/duck/Yunlin/15010369-1/2015		Import from public-domain	Huang,C.W.; Chen,L.H.; Lee,D.H.; Liu,Y.P.; Li,W.C.; Lee,M.S.; Chen,Y.P.; Lee,F.; Chiou,C.J.; Lin,Y.J.; Lin,Y.-J.
EPI1892146	HA	Taiwan	2015-Jan-21	EPI_ISL_4032522	A/duck/Yunlin/15010458-1/2015		Import from public-domain	Huang,C.W.; Chen,L.H.; Lee,D.H.; Liu,Y.P.; Li,W.C.; Lee,M.S.; Chen,Y.P.; Lee,F.; Chiou,C.J.; Lin,Y.J.; Lin,Y.-J.
EPI1892154	HA	Taiwan	2015-Jan-24	EPI_ISL_4032531	A/duck/Yunlin/15010538/2015		Import from public-domain	Huang,C.W.; Chen,L.H.; Lee,D.H.; Liu,Y.P.; Li,W.C.; Lee,M.S.; Chen,Y.P.; Lee,F.; Chiou,C.J.; Lin,Y.J.; Lin,Y.-J.
EPI1892162	HA	Taiwan	2015-Jul-02	EPI_ISL_4032532	A/duck/Yunlin/15070002-2/2015		Import from public-domain	Huang,C.W.; Chen,L.H.; Lee,D.H.; Liu,Y.P.; Li,W.C.; Lee,M.S.; Chen,Y.P.; Lee,F.; Chiou,C.J.; Lin,Y.J.; Lin,Y.-J.
EPI1892170	HA	Taiwan	2015-Feb-09	EPI_ISL_4032533	A/duck/Yunlin/15A03403-1-20T/2015		Import from public-domain	Huang,C.W.; Chen,L.H.; Lee,D.H.; Liu,Y.P.; Li,W.C.; Lee,M.S.; Chen,Y.P.; Lee,F.; Chiou,C.J.; Lin,Y.J.; Lin,Y.-J.
EPI1892178	HA	Taiwan	2015-Sep-09	EPI_ISL_4032534	A/duck/Yunlin/15A04883-1-10T/2015		Import from public-domain	Huang,C.W.; Chen,L.H.; Lee,D.H.; Liu,Y.P.; Li,W.C.; Lee,M.S.; Chen,Y.P.; Lee,F.; Chiou,C.J.; Lin,Y.J.; Lin,Y.-J.
EPI1892186	HA	Taiwan	2015-Oct-30	EPI_ISL_4032535	A/duck/Yunlin/15A5019/2015		Import from public-domain	Huang,C.W.; Chen,L.H.; Lee,D.H.; Liu,Y.P.; Li,W.C.; Lee,M.S.; Chen,Y.P.; Lee,F.; Chiou,C.J.; Lin,Y.J.; Lin,Y.-J.
EPI1892264	HA	Taiwan	2015-Apr-01	EPI_ISL_4032545	A/goose/Changhua/15040008/2015		Import from public-domain	Huang,C.W.; Chen,L.H.; Lee,D.H.; Liu,Y.P.; Li,W.C.; Lee,M.S.; Chen,Y.P.; Lee,F.; Chiou,C.J.; Lin,Y.J.; Lin,Y.-J.
EPI1892272	HA	Taiwan	2015-Jan-09	EPI_ISL_4032546	A/goose/Chiayi/15010008-3/2015		Import from public-domain	Huang,C.W.; Chen,L.H.; Lee,D.H.; Liu,Y.P.; Li,W.C.; Lee,M.S.; Chen,Y.P.; Lee,F.; Chiou,C.J.; Lin,Y.J.; Lin,Y.-J.
EPI1892280	HA	Taiwan	2015-Jan-09	EPI_ISL_4032547	A/goose/Chiayi/15010016-1/2015		Import from public-domain	Huang,C.W.; Chen,L.H.; Lee,D.H.; Liu,Y.P.; Li,W.C.; Lee,M.S.; Chen,Y.P.; Lee,F.; Chiou,C.J.; Lin,Y.J.; Lin,Y.-J.
EPI1892288	HA	Taiwan	2015-Jan-31	EPI_ISL_4032548	A/goose/Chiayi/15020022/2015		Import from public-domain	Huang,C.W.; Chen,L.H.; Lee,D.H.; Liu,Y.P.; Li,W.C.; Lee,M.S.; Chen,Y.P.; Lee,F.; Chiou,C.J.; Lin,Y.J.; Lin,Y.-J.
EPI1892296	HA	Taiwan	2016-Jan-07	EPI_ISL_4032549	A/goose/Chiayi/16010017-2/2016		Import from public-domain	Huang,C.W.; Chen,L.H.; Lee,D.H.; Liu,Y.P.; Li,W.C.; Lee,M.S.; Chen,Y.P.; Lee,F.; Chiou,C.J.; Lin,Y.J.; Lin,Y.-J.
EPI1892304	HA	Taiwan	2016-Apr-01	EPI_ISL_4032550	A/goose/Chiayi/16040003-1/2016		Import from public-domain	Huang,C.W.; Chen,L.H.; Lee,D.H.; Liu,Y.P.; Li,W.C.; Lee,M.S.; Chen,Y.P.; Lee,F.; Chiou,C.J.; Lin,Y.J.; Lin,Y.-J.
EPI1892312	HA	Taiwan	2016-Apr-06	EPI_ISL_4032551	A/goose/Chiayi/16040005/2016		Import from public-domain	Huang,C.W.; Chen,L.H.; Lee,D.H.; Liu,Y.P.; Li,W.C.; Lee,M.S.; Chen,Y.P.; Lee,F.; Chiou,C.J.; Lin,Y.J.; Lin,Y.-J.
EPI1892320	HA	Taiwan	2016-Apr-09	EPI_ISL_4032552	A/goose/Chiayi/16040007-1/2016		Import from public-domain	Huang,C.W.; Chen,L.H.; Lee,D.H.; Liu,Y.P.; Li,W.C.; Lee,M.S.; Chen,Y.P.; Lee,F.; Chiou,C.J.; Lin,Y.J.; Lin,Y.-J.
EPI1892384	HA	Taiwan	2015-Jan-08	EPI_ISL_4032560	A/goose/Pingtung/15010007-4/2015		Import from public-domain	Huang,C.W.; Chen,L.H.; Lee,D.H.; Liu,Y.P.; Li,W.C.; Lee,M.S.; Chen,Y.P.; Lee,F.; Chiou,C.J.; Lin,Y.J.; Lin,Y.-J.
EPI1892392	HA	Taiwan	2015-Jan-11	EPI_ISL_4032561	A/goose/Pingtung/15010037-1/2015		Import from public-domain	Huang,C.W.; Chen,L.H.; Lee,D.H.; Liu,Y.P.; Li,W.C.; Lee,M.S.; Chen,Y.P.; Lee,F.; Chiou,C.J.; Lin,Y.J.; Lin,Y.-J.
EPI1892400	HA	Taiwan	2015-May-05	EPI_ISL_4032562	A/goose/Pingtung/15050014/2015		Import from public-domain	Huang,C.W.; Chen,L.H.; Lee,D.H.; Liu,Y.P.; Li,W.C.; Lee,M.S.; Chen,Y.P.; Lee,F.; Chiou,C.J.; Lin,Y.J.; Lin,Y.-J.
EPI1892408	HA	Taiwan	2016-Jan-30	EPI_ISL_4032563	A/goose/Pingtung/16010061/2016		Import from public-domain	Huang,C.W.; Chen,L.H.; Lee,D.H.; Liu,Y.P.; Li,W.C.; Lee,M.S.; Chen,Y.P.; Lee,F.; Chiou,C.J.; Lin,Y.J.; Lin,Y.-J.
EPI1892416	HA	Taiwan	2016-Jan-15	EPI_ISL_4032564	A/goose/Tainan/16010031-2/2016		Import from public-domain	Huang,C.W.; Chen,L.H.; Lee,D.H.; Liu,Y.P.; Li,W.C.; Lee,M.S.; Chen,Y.P.; Lee,F.; Chiou,C.J.; Lin,Y.J.; Lin,Y.-J.
EPI1892424	HA	Taiwan	2016-Feb-24	EPI_ISL_4032565	A/goose/Tainan/16020041-2/2016		Import from public-domain	Huang,C.W.; Chen,L.H.; Lee,D.H.; Liu,Y.P.; Li,W.C.; Lee,M.S.; Chen,Y.P.; Lee,F.; Chiou,C.J.; Lin,Y.J.; Lin,Y.-J.
EPI1892432	HA	Taiwan	2016-Apr-19	EPI_ISL_4032566	A/goose/Tainan/16040018-1/2016		Import from public-domain	Huang,C.W.; Chen,L.H.; Lee,D.H.; Liu,Y.P.; Li,W.C.; Lee,M.S.; Chen,Y.P.; Lee,F.; Chiou,C.J.; Lin,Y.J.; Lin,Y.-J.
EPI1892440	HA	Taiwan	2016-Jul-01	EPI_ISL_4032567	A/goose/Tainan/16070002/2016		Import from public-domain	Huang,C.W.; Chen,L.H.; Lee,D.H.; Liu,Y.P.; Li,W.C.; Lee,M.S.; Chen,Y.P.; Lee,F.; Chiou,C.J.; Lin,Y.J.; Lin,Y.-J.
EPI1892480	HA	Taiwan	2015-Jan-12	EPI_ISL_4032572	A/goose/Taoyuan/15010041/2015		Import from public-domain	Huang,C.W.; Chen,L.H.; Lee,D.H.; Liu,Y.P.; Li,W.C.; Lee,M.S.; Chen,Y.P.; Lee,F.; Chiou,C.J.; Lin,Y.J.; Lin,Y.-J.
EPI1892496	HA	Taiwan	2015-Jan-08	EPI_ISL_4032574	A/goose/Yunlin/15010005/2015		Import from public-domain	Huang,C.W.; Chen,L.H.; Lee,D.H.; Liu,Y.P.; Li,W.C.; Lee,M.S.; Chen,Y.P.; Lee,F.; Chiou,C.J.; Lin,Y.J.; Lin,Y.-J.
EPI1892504	HA	Taiwan	2015-Jan-09	EPI_ISL_4032575	A/goose/Yunlin/15010009-1/2015		Import from public-domain	Huang,C.W.; Chen,L.H.; Lee,D.H.; Liu,Y.P.; Li,W.C.; Lee,M.S.; Chen,Y.P.; Lee,F.; Chiou,C.J.; Lin,Y.J.; Lin,Y.-J.
EPI1892512	HA	Taiwan	2015-Jan-09	EPI_ISL_4032576	A/goose/Yunlin/15010010-2/2015		Import from public-domain	Huang,C.W.; Chen,L.H.; Lee,D.H.; Liu,Y.P.; Li,W.C.; Lee,M.S.; Chen,Y.P.; Lee,F.; Chiou,C.J.; Lin,Y.J.; Lin,Y.-J.
EPI1892520	HA	Taiwan	2015-Jan-09	EPI_ISL_4032577	A/goose/Yunlin/15010011-1/2015		Import from public-domain	Huang,C.W.; Chen,L.H.; Lee,D.H.; Liu,Y.P.; Li,W.C.; Lee,M.S.; Chen,Y.P.; Lee,F.; Chiou,C.J.; Lin,Y.J.; Lin,Y.-J.
EPI1892540	HA	Taiwan	2015-Jan-11	EPI_ISL_4032578	A/goose/Yunlin/15010029-1/2015		Import from public-domain	Huang,C.W.; Chen,L.H.; Lee,D.H.; Liu,Y.P.; Li,W.C.; Lee,M.S.; Chen,Y.P.; Lee,F.; Chiou,C.J.; Lin,Y.J.; Lin,Y.-J.
EPI1896231	HA	Vietnam	2015-Jul-26	EPI_ISL_4061544	A/Quail/Viet Nam/4615/2015		Import from public-domain	Bui,V.N.; Dao,T.D.; Pham,H.T.; Bui,A.N.; Ogawa,H.; Imai,K.
EPI1896288	HA	Vietnam	2015-Aug-21	EPI_ISL_4061563	A/duck/Vietnam/4915-HA/2015		Import from public-domain	Bui,V.N.; Dao,T.D.; Pham,H.T.; Bui,A.N.; Ogawa,H.; Imai,K.
EPI1896292	HA	Vietnam	2015-Sep-09	EPI_ISL_4061567	A/chicken/Viet Nam/6115/2015		Import from public-domain	Bui,V.N.; Dao,T.D.; Pham,H.T.; Bui,A.N.; Ogawa,H.; Kunitoshi,I.
EPI1930772	HA	China	2016-Nov-11	EPI_ISL_6781353	A/goose/China/Yizheng11/2016		Import from public-domain	Xu,N.
EPI1930773	HA	China	2016-Sep-16	EPI_ISL_6781354	A/goose/China/BaoYing09/2016		Import from public-domain	Xu,N.
EPI2387054	HA	Bangladesh	2017-Jan-01	EPI_ISL_16868918	A/Chicken/Bangladesh/NRL_AI_161617/2017		Import from public-domain	Carnegie,L.
EPI2387055	HA	Bangladesh	2016-Feb-09	EPI_ISL_16868921	A/Crow/Bangladesh/NRL_AI_68916/2016		Import from public-domain	Carnegie,L.
EPI2387053	HA	Bangladesh	2017-Jan-01	EPI_ISL_16868968	A/Chicken/Bangladesh/NRL_AI_161417/2017		Import from public-domain	Carnegie,L.
EPI2439922	HA	Vietnam	2016-Sep-13	EPI_ISL_17090181	A/duck/Vietnam/QN3253/2016		Import from public-domain	Guan,L.; Zhong,G.; Fan,S.; Plisch,E.M.; Presler,R.; Gu,C.; Babujee,L.; Pattinson,D.; Hang,N.L.K.; Phuong,H.V.M.; Le,M.Q.; van Bakel,H.; Neumann,G.; Kawaoka,Y.
EPI2439955	HA	Vietnam	2016-Sep-13	EPI_ISL_17090186	A/duck/Vietnam/QN3262/2016		Import from public-domain	Guan,L.; Zhong,G.; Fan,S.; Plisch,E.M.; Presler,R.; Gu,C.; Babujee,L.; Pattinson,D.; Hang,N.L.K.; Phuong,H.V.M.; Le,M.Q.; van Bakel,H.; Neumann,G.; Kawaoka,Y.
EPI2580282	HA	Vietnam	2015-Nov-14	EPI_ISL_17733593	A/chicken/Vietnam/127/2015		Import from public-domain	Soda,K.; Nguyen,K.H.; Trang,H.U.; Le,Q.M.; Ito,T.; Le.Q.M.
EPI2580283	HA	Vietnam	2015-Nov-14	EPI_ISL_17733607	A/chicken/Vietnam/128/2015		Import from public-domain	Soda,K.; Nguyen,K.H.; Trang,H.U.; Le,Q.M.; Ito,T.; Le.Q.M.
EPI2580284	HA	Vietnam	2015-Nov-14	EPI_ISL_17733622	A/chicken/Nha Trang/129/2015		Import from public-domain	Soda,K.; Nguyen,K.H.; Trang,H.U.; Le,Q.M.; Ito,T.; Le.Q.M.
EPI2580285	HA	Vietnam	2016-Mar-04	EPI_ISL_17733636	A/duck/Vietnam/254016/2016		Import from public-domain	Soda,K.; Nguyen,K.H.; Trang,H.U.; Le,Q.M.; Ito,T.; Le.Q.M.
EPI2580301	HA	Japan	2017-Jan-16	EPI_ISL_17733696	A/whooper swan/Japan/17/2017		Import from public-domain	Sakoda,Y.; Okamatsu,M.; Matsuno,K.; Jizou,M.
EPI2580337	HA	China	2016-Sep-01	EPI_ISL_17733999	A/poultry/China/XY165-4/2016		Import from public-domain	Zhao,Z.
EPI2580338	HA	China	2016-Sep-01	EPI_ISL_17734020	A/poultry/China/XY014/2016		Import from public-domain	Zhao,Z.
EPI2580339	HA	Korea, Republic of	2015-Nov-05	EPI_ISL_17734065	A/aquatic bird/South Korea/sw007/2015		Import from public-domain	Jeong,D.G.; Le,T.B.; Yoon,S.-W.
EPI2580398	HA	Vietnam	2015-Oct-25	EPI_ISL_17734100	A/duck/Vietnam/HN-2508/2015		Import from public-domain	Tan,G.; Pickett,B.; Fedorova,N.; Amedeo,P.; Isom,R.; Hu,L.; Christensen,J.; Miller,J.; Durbin,A.; Williams,T.; Arumemi,F.; Kawaoka,Y.; Zhong,G.; Neumann,G.
EPI2580399	HA	Vietnam	2015-Oct-25	EPI_ISL_17734101	A/duck/Vietnam/HN-2501/2015		Import from public-domain	Tan,G.; Pickett,B.; Fedorova,N.; Amedeo,P.; Isom,R.; Hu,L.; Christensen,J.; Miller,J.; Durbin,A.; Williams,T.; Arumemi,F.; Kawaoka,Y.; Zhong,G.; Neumann,G.
EPI2580400	HA	Vietnam	2015-Oct-25	EPI_ISL_17734102	A/duck/Vietnam/HN-2504/2015		Import from public-domain	Tan,G.; Pickett,B.; Fedorova,N.; Amedeo,P.; Isom,R.; Hu,L.; Christensen,J.; Miller,J.; Durbin,A.; Williams,T.; Arumemi,F.; Kawaoka,Y.; Zhong,G.; Neumann,G.
EPI2580401	HA	Vietnam	2015-Oct-25	EPI_ISL_17734103	A/duck/Vietnam/HN-2506/2015		Import from public-domain	Tan,G.; Pickett,B.; Fedorova,N.; Amedeo,P.; Isom,R.; Hu,L.; Christensen,J.; Miller,J.; Durbin,A.; Williams,T.; Arumemi,F.; Kawaoka,Y.; Zhong,G.; Neumann,G.
EPI2580402	HA	Vietnam	2016-Jan-05	EPI_ISL_17734104	A/duck/Vietnam/QN-2611/2016		Import from public-domain	Tan,G.; Pickett,B.; Fedorova,N.; Amedeo,P.; Isom,R.; Hu,L.; Christensen,J.; Miller,J.; Durbin,A.; Williams,T.; Arumemi,F.; Kawaoka,Y.; Zhong,G.; Neumann,G.
EPI2580403	HA	Vietnam	2016-Jan-05	EPI_ISL_17734105	A/duck/Vietnam/QN-2612/2016		Import from public-domain	Tan,G.; Pickett,B.; Fedorova,N.; Amedeo,P.; Isom,R.; Hu,L.; Christensen,J.; Miller,J.; Durbin,A.; Williams,T.; Arumemi,F.; Kawaoka,Y.; Zhong,G.; Neumann,G.
EPI2580404	HA	Vietnam	2016-Jan-05	EPI_ISL_17734106	A/duck/Vietnam/QN-2616/2016		Import from public-domain	Tan,G.; Pickett,B.; Fedorova,N.; Amedeo,P.; Isom,R.; Hu,L.; Christensen,J.; Miller,J.; Durbin,A.; Williams,T.; Arumemi,F.; Kawaoka,Y.; Zhong,G.; Neumann,G.
EPI2580405	HA	Vietnam	2016-Apr-16	EPI_ISL_17734107	A/duck/Viet Nam/QN-2706/2016		Import from public-domain	Tan,G.; Pickett,B.; Fedorova,N.; Amedeo,P.; Isom,R.; Hu,L.; Christensen,J.; Miller,J.; Durbin,A.; Williams,T.; Arumemi,F.; Kawaoka,Y.; Zhong,G.; Neumann,G.
EPI2584462	HA	China	2015-Jan-06	EPI_ISL_17767168	A/whooper swan/Shanxi/17L/2015	Chinese Academy of Sciences	Import from public-domain	Su,W., Xing,C., Zhao,N., Luo,J., Li,Q., Wu,Y., Li,M., Wang,C., Ding,H.; He,H.
EPI2584469	HA	China	2016-Sep-01	EPI_ISL_17767175	A/poultry/China/XY01.4/2016	Chinese Academy of Medical Sciences	Import from public-domain	Zhao,Z.
EPI2584470	HA	China	2016-Sep-01	EPI_ISL_17767176	A/poultry/China/XY165.4/2016	Chinese Academy of Medical Sciences	Import from public-domain	Zhao,Z.
EPI559727	HA	China	2015-Jan-04	EPI_ISL_171121	A/whooper swan/Henan/SMX1/2015(H5N1)	CAS Key Laboratory of Pathogenic Microbiology and Immunology, Institute of Microbiology, Chinese Academy of Sciences	Institute of Microbiology, Chinese Academy of Sciences
EPI559770	HA	China	2015-Jan-04	EPI_ISL_171141	A/whooper swan/Henan/SMX3/2015(H5N1)	CAS Key Laboratory of Pathogenic Microbiology and Immunology, Institute of Microbiology, Chinese Academy of Sciences	Institute of Microbiology, Chinese Academy of Sciences
EPI559789	HA	China	2015-Jan-05	EPI_ISL_171165	A/whooper swan/Henan/SMX4/2015(H5N1)	CAS Key Laboratory of Pathogenic Microbiology and Immunology, Institute of Microbiology, Chinese Academy of Sciences	Institute of Microbiology, Chinese Academy of Sciences
EPI559910	HA	China	2015-Jan-05	EPI_ISL_171186	A/whooper swan/Henan/SMX9/2015(H5N1)	CAS Key Laboratory of Pathogenic Microbiology and Immunology, Institute of Microbiology, Chinese Academy of Sciences	Institute of Microbiology, Chinese Academy of Sciences
EPI560152	HA	China	2015-Jan-05	EPI_ISL_171296	A/pochard/Henan/SMX1/2015	Institute of Pathogen Biology, Taishan Medical College	Institute of Microbiology, Chinese Academy of Sciences	Shi,Weifeng; Bi,Yuhai
EPI590549	HA	Taiwan	2015-Jan-15	EPI_ISL_179534	A/chicken/PT/a158/2015		Import from public-domain	Cheng,M.-C.; Tan,D.-H.; Chen,L.-H.; Liu,Y.-P.; Lin,Y.-J.; Tsai,H.-J.; Chang,P.-C.
EPI590556	HA	Taiwan	2015-Jan-22	EPI_ISL_179535	A/chicken/GY/a451/2015		Import from public-domain	Cheng,M.-C.; Tan,D.-H.; Chen,L.-H.; Liu,Y.-P.; Lin,Y.-J.; Tsai,H.-J.; Chang,P.-C.
EPI590563	HA	Taiwan	2015-Jan-23	EPI_ISL_179536	A/chicken/TC/a504/2015		Import from public-domain	Cheng,M.-C.; Tan,D.-H.; Chen,L.-H.; Liu,Y.-P.; Lin,Y.-J.; Tsai,H.-J.; Chang,P.-C.
EPI590570	HA	Taiwan	2015-Jan-26	EPI_ISL_179537	A/chicken/CH/a556/2015		Import from public-domain	Cheng,M.-C.; Tan,D.-H.; Chen,L.-H.; Liu,Y.-P.; Lin,Y.-J.; Tsai,H.-J.; Chang,P.-C.
EPI590577	HA	Taiwan	2015-Jan-29	EPI_ISL_179538	A/chicken/TY/a665/2015		Import from public-domain	Cheng,M.-C.; Tan,D.-H.; Chen,L.-H.; Liu,Y.-P.; Lin,Y.-J.; Tsai,H.-J.; Chang,P.-C.
EPI590584	HA	Taiwan	2015-Jan-29	EPI_ISL_179539	A/chicken/SC/a688/2015		Import from public-domain	Cheng,M.-C.; Tan,D.-H.; Chen,L.-H.; Liu,Y.-P.; Lin,Y.-J.; Tsai,H.-J.; Chang,P.-C.
EPI608777	HA	Israel	2015-Jan-24	EPI_ISL_187320	A/turkey/Israel/107/2015		Import from public-domain	Shkoda,I.; Lapin,K.; Simanov,L.; Lublin,A.
EPI608778	HA	Israel	2015-Jan-22	EPI_ISL_187321	A/chicken/Israel/88/2015		Import from public-domain	Shkoda,I.; Lapin,K.; Simanov,L.; Lublin,A.
EPI608779	HA	Israel	2015-Jan-20	EPI_ISL_187322	A/chicken/Qalqilya/53/2015		Import from public-domain	Shkoda,I.; Lapin,K.; Simanov,L.; Lublin,A.
EPI608780	HA	Israel	2015-Jan-18	EPI_ISL_187323	A/turkey/Jenin/39/2015		Import from public-domain	Shkoda,I.; Lapin,K.; Simanov,L.; Lublin,A.
EPI608781	HA	Israel	2015-Feb-10	EPI_ISL_187324	A/turkey/Israel/274/2015		Import from public-domain	Shkoda,I.; Lapin,K.; Simanov,L.; Lublin,A.
EPI608782	HA	Israel	2015-Jan-29	EPI_ISL_187325	A/turkey/Israel/174/2015		Import from public-domain	Shkoda,I.; Lapin,K.; Simanov,L.; Lublin,A.
EPI608783	HA	Israel	2015-Jan-29	EPI_ISL_187326	A/turkey/Israel/188/2015		Import from public-domain	Shkoda,I.; Lapin,K.; Simanov,L.; Lublin,A.
EPI608784	HA	Israel	2015-Feb-19	EPI_ISL_187327	A/chicken/Israel/333/2015		Import from public-domain	Shkoda,I.; Lapin,K.; Simanov,L.; Lublin,A.
EPI608785	HA	Israel	2015-Jan-28	EPI_ISL_187328	A/chicken/Israel/156/2015		Import from public-domain	Shkoda,I.; Lapin,K.; Simanov,L.; Lublin,A.
EPI608786	HA	Israel	2015-Feb-01	EPI_ISL_187329	A/turkey/Israel/209/2015		Import from public-domain	Shkoda,I.; Lapin,K.; Simanov,L.; Lublin,A.
EPI608787	HA	Israel	2015-Jan-23	EPI_ISL_187330	A/spur-winged lapwing/Israel/101/2015		Import from public-domain	Shkoda,I.; Lapin,K.; Simanov,L.; Lublin,A.
EPI664197	HA	China	2015-Apr-23	EPI_ISL_200235	A/goose/Guangdong/04.23 DGQTXC216-O/2015(Mixed)		Institute of Microbiology, Chinese Academy of Sciences
EPI664205	HA	China	2015-Apr-23	EPI_ISL_200236	A/duck/Guangdong/04.23 DGQTXC227-P/2015(Mixed)		Institute of Microbiology, Chinese Academy of Sciences
EPI664213	HA	China	2015-Apr-23	EPI_ISL_200237	A/duck/Guangdong/04.23 DGQTXC214-O/2015(Mixed)		Institute of Microbiology, Chinese Academy of Sciences
EPI664221	HA	China	2015-Jan-14	EPI_ISL_200238	A/duck/Jiangxi/01.14 NCJD034-P/2015(Mixed)		Institute of Microbiology, Chinese Academy of Sciences
EPI664229	HA	China	2015-Apr-23	EPI_ISL_200239	A/duck/Guangdong/04.23 DGQTXC234-P/2015(Mixed)		Institute of Microbiology, Chinese Academy of Sciences
EPI664237	HA	China	2015-Apr-23	EPI_ISL_200240	A/duck/Guangdong/04.23 DGQTSJ127-O/2015(Mixed)		Institute of Microbiology, Chinese Academy of Sciences
EPI664245	HA	China	2015-Apr-23	EPI_ISL_200241	A/duck/Guangdong/04.23 DGQTXC185-O/2015(Mixed)		Institute of Microbiology, Chinese Academy of Sciences
EPI664253	HA	China	2015-Apr-23	EPI_ISL_200242	A/goose/Guangdong/04.23 DGQTXC237-O/2015(Mixed)		Institute of Microbiology, Chinese Academy of Sciences
EPI664261	HA	China	2015-Apr-23	EPI_ISL_200243	A/duck/Guangdong/04.23 DGQTXC231-P/2015(Mixed)		Institute of Microbiology, Chinese Academy of Sciences
EPI664269	HA	China	2015-Apr-23	EPI_ISL_200244	A/duck/Guangdong/04.23 DGQTSJ124-O/2015(Mixed)		Institute of Microbiology, Chinese Academy of Sciences
EPI664277	HA	China	2015-Apr-23	EPI_ISL_200245	A/duck/Guangdong/04.23 DGQTSJ121-O/2015(Mixed)		Institute of Microbiology, Chinese Academy of Sciences
EPI664285	HA	China	2015-Apr-23	EPI_ISL_200246	A/duck/Guangdong/04.23 DGQTXC233-P/2015(Mixed)		Institute of Microbiology, Chinese Academy of Sciences
EPI664293	HA	China	2015-Apr-22	EPI_ISL_200247	A/duck/Guangdong/04.22 DGCP083-O/2015(Mixed)		Institute of Microbiology, Chinese Academy of Sciences
EPI664301	HA	China	2015-Apr-23	EPI_ISL_200248	A/duck/Guangdong/04.23 DGQTXC188-O/2015(Mixed)		Institute of Microbiology, Chinese Academy of Sciences
EPI664309	HA	China	2015-Mar-27	EPI_ISL_200249	A/duck/Guangdong/03.27 DGQTSJ134-O/2015(Mixed)		Institute of Microbiology, Chinese Academy of Sciences
EPI664317	HA	China	2015-Mar-27	EPI_ISL_200250	A/goose/Guangdong/03.27 DGQTSJ180-O/2015(Mixed)		Institute of Microbiology, Chinese Academy of Sciences
EPI664325	HA	China	2015-Mar-27	EPI_ISL_200251	A/duck/Guangdong/03.27 DGQTSJ133-O/2015(Mixed)		Institute of Microbiology, Chinese Academy of Sciences
EPI664333	HA	China	2015-Apr-23	EPI_ISL_200252	A/duck/Guangdong/04.23 DGQTSJ148-O/2015(Mixed)		Institute of Microbiology, Chinese Academy of Sciences
EPI664341	HA	China	2015-Apr-23	EPI_ISL_200253	A/duck/Guangdong/04.23 DGQTSJ144-O/2015(Mixed)		Institute of Microbiology, Chinese Academy of Sciences
EPI664349	HA	China	2015-Apr-23	EPI_ISL_200254	A/duck/Guangdong/04.23 DGQTXC230-P/2015(Mixed)		Institute of Microbiology, Chinese Academy of Sciences
EPI664357	HA	China	2015-Apr-22	EPI_ISL_200255	A/duck/Guangdong/04.22 DGCP071-P/2015(Mixed)		Institute of Microbiology, Chinese Academy of Sciences
EPI664365	HA	China	2015-Apr-23	EPI_ISL_200256	A/duck/Guangdong/04.23 DGQTSJ147-O/2015(Mixed)		Institute of Microbiology, Chinese Academy of Sciences
EPI664373	HA	China	2015-Mar-27	EPI_ISL_200257	A/duck/Guangdong/03.27 DGQTSJ121-P/2015(Mixed)		Institute of Microbiology, Chinese Academy of Sciences
EPI664389	HA	China	2015-Apr-15	EPI_ISL_200259	A/duck/Guangdong/04.15 SZBAXQ019/2015(Mixed)		Institute of Microbiology, Chinese Academy of Sciences
EPI664421	HA	China	2015-Apr-11	EPI_ISL_200263	A/chicken/Jilin/04.11 CCHSL007/2015(Mixed)		Institute of Microbiology, Chinese Academy of Sciences
EPI664429	HA	China	2015-Apr-14	EPI_ISL_200264	A/duck/Hunan/04.14 YYGK0439-Z-P/2015(Mixed)		Institute of Microbiology, Chinese Academy of Sciences
EPI664453	HA	China	2015-Apr-14	EPI_ISL_200267	A/chicken/Hunan/04.14 YYXS0812-O/2015(Mixed)		Institute of Microbiology, Chinese Academy of Sciences
EPI664485	HA	China	2015-May-06	EPI_ISL_200271	A/chicken/Jiangxi/05.06 NCDZT1212-O/2015(Mixed)		Institute of Microbiology, Chinese Academy of Sciences
EPI664493	HA	China	2015-Apr-01	EPI_ISL_200272	A/duck/Jiangxi/04.01 NCDZT0304-O/2015(Mixed)		Institute of Microbiology, Chinese Academy of Sciences
EPI664501	HA	China	2015-Apr-01	EPI_ISL_200273	A/chicken/Jiangxi/04.01 NCDZT0048-O/2015(Mixed)		Institute of Microbiology, Chinese Academy of Sciences
EPI664517	HA	China	2015-Mar-06	EPI_ISL_200275	A/duck/Hubei/03.06 WHWTZ0049-P/2015(Mixed)		Institute of Microbiology, Chinese Academy of Sciences
EPI664525	HA	China	2015-Mar-06	EPI_ISL_200276	A/duck/Hubei/03.06 WHWTZ0111-O/2015(Mixed)		Institute of Microbiology, Chinese Academy of Sciences
EPI664533	HA	China	2015-Mar-06	EPI_ISL_200277	A/duck/Hubei/03.06 WHWTZ0150-P/2015(Mixed)		Institute of Microbiology, Chinese Academy of Sciences
EPI664541	HA	China	2015-Mar-16	EPI_ISL_200278	A/duck/Yunnan/03.16 DQXYL007-O/2015(Mixed)		Institute of Microbiology, Chinese Academy of Sciences
EPI664549	HA	China	2015-Mar-09	EPI_ISL_200279	A/duck/Hunan/03.09 YYFQH0036-P/2015(Mixed)		Institute of Microbiology, Chinese Academy of Sciences
EPI664557	HA	China	2015-Mar-09	EPI_ISL_200280	A/duck/Hunan/03.09 YYFQH0046-O/2015(Mixed)		Institute of Microbiology, Chinese Academy of Sciences
EPI664581	HA	China	2015-Mar-16	EPI_ISL_200283	A/chicken/Yunnan/03.16 DQXYL061-1-O/2015(Mixed)		Institute of Microbiology, Chinese Academy of Sciences
EPI664597	HA	China	2015-Apr-14	EPI_ISL_200285	A/duck/Hunan/04.14 YYGK451-1-O/2015(Mixed)		Institute of Microbiology, Chinese Academy of Sciences
EPI664605	HA	China	2015-Apr-14	EPI_ISL_200286	A/duck/Hunan/04.14 YYGK0453-1-O/2015(Mixed)		Institute of Microbiology, Chinese Academy of Sciences
EPI664613	HA	China	2015-Apr-14	EPI_ISL_200287	A/duck/Hunan/04.14 YYGK067-O/2015(Mixed)		Institute of Microbiology, Chinese Academy of Sciences
EPI664621	HA	China	2015-Apr-14	EPI_ISL_200288	A/duck/Hunan/04.14 YYGK472-O/2015(Mixed)		Institute of Microbiology, Chinese Academy of Sciences
EPI664629	HA	China	2015-Apr-14	EPI_ISL_200289	A/Pigeon/Hunan/04.14 YYXS0912-O/2015(Mixed)		Institute of Microbiology, Chinese Academy of Sciences
EPI665389	HA	China	2015-Apr-04	EPI_ISL_200384	A/duck/Jilin/04.04 SY002-O/2015(Mixed)		Institute of Microbiology, Chinese Academy of Sciences
EPI665413	HA	China	2015-Apr-12	EPI_ISL_200387	A/chicken/Jilin/04.12 MHK004-O/2015(Mixed)		Institute of Microbiology, Chinese Academy of Sciences
EPI665509	HA	China	2015-Feb-07	EPI_ISL_200399	A/chicken/Hunan/02.07 YYFQHJ7Y-O/2015(Mixed)		Institute of Microbiology, Chinese Academy of Sciences
EPI665597	HA	China	2015-Apr-01	EPI_ISL_200410	A/chicken/Jiangxi/04.01 NCDZT0299-P/2015(Mixed)		Institute of Microbiology, Chinese Academy of Sciences
EPI665661	HA	China	2015-Apr-01	EPI_ISL_200418	A/chicken/Jiangxi/04.01 NCDZT0090-O/2015(Mixed)		Institute of Microbiology, Chinese Academy of Sciences
EPI665709	HA	China	2015-Mar-06	EPI_ISL_200424	A/duck/Hubei/03.06 WHWTZ0122-P/2015(Mixed)		Institute of Microbiology, Chinese Academy of Sciences
EPI665733	HA	China	2015-Mar-06	EPI_ISL_200427	A/duck/Hubei/03.06 WHWTZ0107-O/2015(Mixed)		Institute of Microbiology, Chinese Academy of Sciences
EPI666061	HA	China	2015-May-23	EPI_ISL_200468	A/goose/Shandong/05.23 AY-GS/2015(Mixed)		Institute of Microbiology, Chinese Academy of Sciences
EPI666637	HA	China	2015-Apr-23	EPI_ISL_200540	A/duck/Guangdong/04.23 DGQTSJ124-P/2015(Mixed)		Institute of Microbiology, Chinese Academy of Sciences
EPI712760	HA	China	2015-Feb-05	EPI_ISL_212420	A/Great Cormorant/Hubei/VI128/2015_H5N1	State Key Laboratory of Virology and Wuhan Institute of Virology, Chinese Academy of Sciences	Wuhan Institute of Virology
EPI712768	HA	China	2015-Feb-05	EPI_ISL_212421	A/Great Cormorant/Hubei/VI132/2015_H5N1	State Key Laboratory of Virology and Wuhan Institute of Virology, Chinese Academy of Sciences	Wuhan Institute of Virology
EPI712776	HA	China	2015-Feb-05	EPI_ISL_212422	A/Great Cormorant/Hubei/VI133/2015_H5N1	State Key Laboratory of Virology and Wuhan Institute of Virology, Chinese Academy of Sciences	Wuhan Institute of Virology
EPI736644	HA	Iran, Islamic Republic of	2015-Jun-15	EPI_ISL_216897	A/chicken/Iran/IRIVO-Nogardan-1/2015		Import from public-domain	Ghalyanchilangeroudi,A.; Ghafouri,S.A.; Maghsoudloo,H.; Tehrani,F.; Farahani,R.K.A.; Abdolahi,H.
EPI736645	HA	Iran, Islamic Republic of	2015-Jun-15	EPI_ISL_216898	A/chicken/Iran/IRIVO-Nogardan-2/2015		Import from public-domain	Ghalyanchilangeroudi,A.; Ghafouri,S.A.; Maghsoudloo,H.; Tehrani,F.; Farahani,R.K.A.; Abdolahi,H.
EPI774113	HA	China	2016-May-09	EPI_ISL_224704	A/Bar-headed Goose/Qinghai/BTY1-B/2016	State Key Laboratory of Virology and Wuhan Institute of Virology, Chinese Academy of Sciences	Wuhan Institute of Virology
EPI774121	HA	China	2016-May-09	EPI_ISL_224705	A/Bar-headed Goose/Qinghai/BTY1-LV/2016	State Key Laboratory of Virology and Wuhan Institute of Virology, Chinese Academy of Sciences	Wuhan Institute of Virology
EPI774133	HA	China	2016-May-12	EPI_ISL_224707	A/Bar-headed Goose/Qinghai/BTY2-B/2016	State Key Laboratory of Virology and Wuhan Institute of Virology, Chinese Academy of Sciences	Wuhan Institute of Virology
EPI774142	HA	China	2016-May-12	EPI_ISL_224708	A/Bar-headed Goose/Qinghai/BTY2-LU/2016	State Key Laboratory of Virology and Wuhan Institute of Virology, Chinese Academy of Sciences	Wuhan Institute of Virology
EPI774150	HA	China	2016-May-12	EPI_ISL_224709	A/Bar-headed Goose/Qinghai/BTY3-B/2016	State Key Laboratory of Virology and Wuhan Institute of Virology, Chinese Academy of Sciences	Wuhan Institute of Virology
EPI774159	HA	China	2016-May-12	EPI_ISL_224710	A/Bar-headed Goose/Qinghai/BTY3-LU/2016	State Key Laboratory of Virology and Wuhan Institute of Virology, Chinese Academy of Sciences	Wuhan Institute of Virology
EPI774168	HA	China	2016-May-12	EPI_ISL_224711	A/Bar-headed Goose/Qinghai/BTY4-B/2016	State Key Laboratory of Virology and Wuhan Institute of Virology, Chinese Academy of Sciences	Wuhan Institute of Virology
EPI774176	HA	China	2016-May-12	EPI_ISL_224712	A/Bar-headed Goose/Qinghai/BTY4-LU/2016	State Key Laboratory of Virology and Wuhan Institute of Virology, Chinese Academy of Sciences	Wuhan Institute of Virology
EPI774185	HA	China	2016-May-12	EPI_ISL_224713	A/Bar-headed Goose/Qinghai/BTY5-B/2016	State Key Laboratory of Virology and Wuhan Institute of Virology, Chinese Academy of Sciences	Wuhan Institute of Virology
EPI774193	HA	China	2016-May-11	EPI_ISL_224714	A/Bar-headed Goose/Qinghai/BTY6-B/2016	State Key Laboratory of Virology and Wuhan Institute of Virology, Chinese Academy of Sciences	Wuhan Institute of Virology
EPI774201	HA	China	2016-May-11	EPI_ISL_224715	A/Bar-headed Goose/Qinghai/BTY6-LU/2016	State Key Laboratory of Virology and Wuhan Institute of Virology, Chinese Academy of Sciences	Wuhan Institute of Virology
EPI774210	HA	China	2016-May-11	EPI_ISL_224716	A/Bar-headed Goose/Qinghai/BTY7-B/2016	State Key Laboratory of Virology and Wuhan Institute of Virology, Chinese Academy of Sciences	Wuhan Institute of Virology
EPI774218	HA	China	2016-May-11	EPI_ISL_224717	A/Bar-headed Goose/Qinghai/BTY7-LU1/2016	State Key Laboratory of Virology and Wuhan Institute of Virology, Chinese Academy of Sciences	Wuhan Institute of Virology
EPI774226	HA	China	2016-May-11	EPI_ISL_224718	A/Bar-headed Goose/Qinghai/BTY7-LU2/2016	State Key Laboratory of Virology and Wuhan Institute of Virology, Chinese Academy of Sciences	Wuhan Institute of Virology
EPI774234	HA	China	2016-May-10	EPI_ISL_224719	A/Bar-headed Goose/Qinghai/BTY8-B/2016	State Key Laboratory of Virology and Wuhan Institute of Virology, Chinese Academy of Sciences	Wuhan Institute of Virology
EPI774242	HA	China	2016-May-10	EPI_ISL_224720	A/Bar-headed Goose/Qinghai/BTY8-LU/2016	State Key Laboratory of Virology and Wuhan Institute of Virology, Chinese Academy of Sciences	Wuhan Institute of Virology
EPI774251	HA	China	2016-May-09	EPI_ISL_224721	A/Bar-headed Goose/Qinghai/BTY9-B/2016	State Key Laboratory of Virology and Wuhan Institute of Virology, Chinese Academy of Sciences	Wuhan Institute of Virology
EPI774259	HA	China	2016-May-09	EPI_ISL_224722	A/Bar-headed Goose/Qinghai/BTY9-LU/2016	State Key Laboratory of Virology and Wuhan Institute of Virology, Chinese Academy of Sciences	Wuhan Institute of Virology
EPI774267	HA	China	2016-May-09	EPI_ISL_224723	A/Bar-headed Goose/Qinghai/BTY10-B/2016	State Key Laboratory of Virology and Wuhan Institute of Virology, Chinese Academy of Sciences	Wuhan Institute of Virology
EPI774277	HA	China	2016-May-09	EPI_ISL_224724	A/Bar-headed Goose/Qinghai/BTY10-LU/2016	State Key Laboratory of Virology and Wuhan Institute of Virology, Chinese Academy of Sciences	Wuhan Institute of Virology
EPI774286	HA	China	2016-May-09	EPI_ISL_224725	A/Bar-headed Goose/Qinghai/BTY11-B/2016	State Key Laboratory of Virology and Wuhan Institute of Virology, Chinese Academy of Sciences	Wuhan Institute of Virology
EPI774294	HA	China	2016-May-09	EPI_ISL_224726	A/Bar-headed Goose/Qinghai/BTY11-LU/2016	State Key Laboratory of Virology and Wuhan Institute of Virology, Chinese Academy of Sciences	Wuhan Institute of Virology
EPI774302	HA	China	2016-May-13	EPI_ISL_224727	A/Bar-headed Goose/Qinghai/BTY12-B/2016	State Key Laboratory of Virology and Wuhan Institute of Virology, Chinese Academy of Sciences	Wuhan Institute of Virology
EPI774310	HA	China	2016-May-13	EPI_ISL_224728	A/Bar-headed Goose/Qinghai/BTY12-LU/2016	State Key Laboratory of Virology and Wuhan Institute of Virology, Chinese Academy of Sciences	Wuhan Institute of Virology
EPI774318	HA	China	2016-May-14	EPI_ISL_224729	A/Bar-headed Goose/Qinghai/BTY13-B/2016	State Key Laboratory of Virology and Wuhan Institute of Virology, Chinese Academy of Sciences	Wuhan Institute of Virology
EPI774326	HA	China	2016-May-14	EPI_ISL_224730	A/Bar-headed Goose/Qinghai/BTY13-LU/2016	State Key Laboratory of Virology and Wuhan Institute of Virology, Chinese Academy of Sciences	Wuhan Institute of Virology
EPI774335	HA	China	2016-May-14	EPI_ISL_224731	A/Bar-headed Goose/Qinghai/BTY14-B/2016	State Key Laboratory of Virology and Wuhan Institute of Virology, Chinese Academy of Sciences	Wuhan Institute of Virology
EPI774344	HA	China	2016-May-14	EPI_ISL_224732	A/Bar-headed Goose/Qinghai/BTY14-LU/2016	State Key Laboratory of Virology and Wuhan Institute of Virology, Chinese Academy of Sciences	Wuhan Institute of Virology
EPI774352	HA	China	2016-May-14	EPI_ISL_224733	A/Bar-headed Goose/Qinghai/BTY15-B/2016	State Key Laboratory of Virology and Wuhan Institute of Virology, Chinese Academy of Sciences	Wuhan Institute of Virology
EPI774361	HA	China	2016-May-14	EPI_ISL_224734	A/Bar-headed Goose/Qinghai/BTY15-LU/2016	State Key Laboratory of Virology and Wuhan Institute of Virology, Chinese Academy of Sciences	Wuhan Institute of Virology
EPI774369	HA	China	2016-May-14	EPI_ISL_224735	A/Bar-headed Goose/Qinghai/BTY16-B/2016	State Key Laboratory of Virology and Wuhan Institute of Virology, Chinese Academy of Sciences	Wuhan Institute of Virology
EPI774378	HA	China	2016-May-14	EPI_ISL_224736	A/Bar-headed Goose/Qinghai/BTY16-LU/2016	State Key Laboratory of Virology and Wuhan Institute of Virology, Chinese Academy of Sciences	Wuhan Institute of Virology
EPI774386	HA	China	2016-May-15	EPI_ISL_224737	A/Bar-headed Goose/Qinghai/BTY17-B/2016	State Key Laboratory of Virology and Wuhan Institute of Virology, Chinese Academy of Sciences	Wuhan Institute of Virology
EPI774394	HA	China	2016-May-15	EPI_ISL_224738	A/Bar-headed Goose/Qinghai/BTY17-LU/2016	State Key Laboratory of Virology and Wuhan Institute of Virology, Chinese Academy of Sciences	Wuhan Institute of Virology
EPI774402	HA	China	2016-May-15	EPI_ISL_224739	A/Bar-headed Goose/Qinghai/BTY18-B/2016	State Key Laboratory of Virology and Wuhan Institute of Virology, Chinese Academy of Sciences	Wuhan Institute of Virology
EPI774410	HA	China	2016-May-15	EPI_ISL_224740	A/Bar-headed Goose/Qinghai/BTY18-LU/2016	State Key Laboratory of Virology and Wuhan Institute of Virology, Chinese Academy of Sciences	Wuhan Institute of Virology
EPI774426	HA	China	2016-May-01	EPI_ISL_224742	A/Brown-headed Gull/Qinghai/ZTO1-B/2016	State Key Laboratory of Virology and Wuhan Institute of Virology, Chinese Academy of Sciences	Wuhan Institute of Virology
EPI774434	HA	China	2016-May-01	EPI_ISL_224743	A/Brown-headed Gull/Qinghai/ZTO1-LU/2016	State Key Laboratory of Virology and Wuhan Institute of Virology, Chinese Academy of Sciences	Wuhan Institute of Virology
EPI774442	HA	China	2016-May-12	EPI_ISL_224744	A/Brown-headed Gull/Qinghai/ZTO3-B/2016	State Key Laboratory of Virology and Wuhan Institute of Virology, Chinese Academy of Sciences	Wuhan Institute of Virology
EPI774450	HA	China	2016-May-12	EPI_ISL_224745	A/Brown-headed Gull/Qinghai/ZTO3-LU/2016	State Key Laboratory of Virology and Wuhan Institute of Virology, Chinese Academy of Sciences	Wuhan Institute of Virology
EPI774458	HA	China	2016-May-11	EPI_ISL_224746	A/Brown-headed Gull/Qinghai/ZTO4-B/2016	State Key Laboratory of Virology and Wuhan Institute of Virology, Chinese Academy of Sciences	Wuhan Institute of Virology
EPI774466	HA	China	2016-May-14	EPI_ISL_224747	A/Brown-headed Gull/Qinghai/ZTO5-B/2016	State Key Laboratory of Virology and Wuhan Institute of Virology, Chinese Academy of Sciences	Wuhan Institute of Virology
EPI774475	HA	China	2016-May-14	EPI_ISL_224748	A/Brown-headed Gull/Qinghai/ZTO5-K/2016	State Key Laboratory of Virology and Wuhan Institute of Virology, Chinese Academy of Sciences	Wuhan Institute of Virology
EPI774483	HA	China	2016-May-15	EPI_ISL_224749	A/Brown-headed Gull/Qinghai/ZTO6-B/2016	State Key Laboratory of Virology and Wuhan Institute of Virology, Chinese Academy of Sciences	Wuhan Institute of Virology
EPI774490	HA	China	2016-May-15	EPI_ISL_224750	A/Brown-headed Gull/Qinghai/ZTO6-SP/2016	State Key Laboratory of Virology and Wuhan Institute of Virology, Chinese Academy of Sciences	Wuhan Institute of Virology
EPI774498	HA	China	2016-May-15	EPI_ISL_224751	A/Brown-headed Gull/Qinghai/ZTO6-MU/2016	State Key Laboratory of Virology and Wuhan Institute of Virology, Chinese Academy of Sciences	Wuhan Institute of Virology
EPI774506	HA	China	2016-May-15	EPI_ISL_224752	A/Great Black-headed Gull/Qinghai/YO1-B/2016	State Key Laboratory of Virology and Wuhan Institute of Virology, Chinese Academy of Sciences	Wuhan Institute of Virology
EPI774540	HA	Lebanon	2016-Apr-22	EPI_ISL_224757	A/chicken/Lebanon/16VIR2783-20/2016	Ministry of Agriculture, Animal Resources Directorate	Istituto Zooprofilattico Sperimentale Delle Venezie	Ali, El Romeh; Bianca, Zecchin; Alice, Fusaro; Silvia, Ormelli; Sabrina, Marciano; Adelaide, Milani; Alessia, Schivo; Annalisa, Salviato; Isabella, Monne
EPI775081	HA	Vietnam	2015-Jan-06	EPI_ISL_224907	A/duck/CaMau/0237/2015		Import from public-domain	Cao,B.V.; Le Ha,T.D.; Mai,V.N.; Dang Trinh,M.A.; Le Phan,K.N.; Vo Tran,N.T.; Hoang,T.
EPI775089	HA	Vietnam	2015-Jan-06	EPI_ISL_224908	A/duck/CaMau/0238/2015		Import from public-domain	Cao,B.V.; Le Ha,T.D.; Mai,V.N.; Dang Trinh,M.A.; Le Phan,K.N.; Vo Tran,N.T.; Hoang,T.
EPI806643	HA	Vietnam	2015-Nov-10	EPI_ISL_229213	A/duck/Vietnam/LBM808/2015		Import from public-domain	Soda,K.; Nguyen,K.H.; Le,Q.M.; Ito,T.; Maegaki,S.
EPI827075	HA	Vietnam	2016-Aug-31	EPI_ISL_232492	A/duck/Vietnam/NCVD1584/2012 NIBRG-301		National Institute for Biological Standards and Control (NIBSC)	Nicolson, Carolyn
EPI855719	HA	Japan	2015-Dec-01	EPI_ISL_237155	A/duck/Yamaguchi/351211/2015	National Institute of Animal Health	National Institute of Animal Health
EPI855925	HA	Japan	2015-Oct-01	EPI_ISL_237173	A/duck/Tokushima/361002/2015		National Institute of Animal Health
EPI858836	HA	India	2016-Oct-17	EPI_ISL_237553	A/duck/India/10CA01/2016	ICAR-National Institute of High Security Animal Diseases	ICAR-National Institute of High Security Animal Diseases	Nagarajan, Shanmugasundaram; Tripathi, Sushil; Kumar, Manoj; Murugkar, Harshad V; Tosh, Chakradhar; Singh, Vijendra Pal
EPI858844	HA	India	2016-Oct-20	EPI_ISL_237554	A/painted stork/India/10CA03/2016	ICAR-National Institute of High Security Animal Diseases	ICAR-National Institute of High Security Animal Diseases	'Nagarajan, Shanmugasundaram; Shukla, Shweta; Kumar, Manoj; Murugkar, H. V.; Tosh, Chakradhar; Singh, Vijendra Pal
EPI872971	HA	Japan	2016-Nov-28	EPI_ISL_240527	A/chicken/Niigata/1-1T/2016	National Institute of Animal Health	National Institute of Animal Health	Uchida, Y.
EPI872979	HA	Japan	2016-Nov-28	EPI_ISL_240528	A/chicken/Niigata/1-2C/2016	National Institute of Animal Health	National Institute of Animal Health	Uchida, Y.
EPI872987	HA	Japan	2016-Nov-28	EPI_ISL_240529	A/muscovy duck/Aomori/1-3T/2016s	National Institute of Animal Health	National Institute of Animal Health	Uchida, Y.
EPI872995	HA	Japan	2016-Nov-28	EPI_ISL_240530	A/chicken/Niigata/1-3C/2016	National Institute of Animal Health	National Institute of Animal Health	Uchida, Y.
EPI873003	HA	Japan	2016-Nov-28	EPI_ISL_240531	A/chicken/Niigata/1-4C/2016	National Institute of Animal Health	National Institute of Animal Health	Uchida, Y.
EPI873011	HA	Japan	2016-Nov-28	EPI_ISL_240532	A/muscovy duck/Aomori/1-1T/2016	National Institute of Animal Health	National Institute of Animal Health	Uchida, Y.
EPI873019	HA	Japan	2016-Nov-28	EPI_ISL_240533	A/muscovy duck/Aomori/1-7T/2016	National Institute of Animal Health	National Institute of Animal Health	Uchida, Y.
EPI873311	HA	Japan	2016-Dec-16	EPI_ISL_240599	A/chicken/Hokkaido/1-3-7T/2016	National Institute of Animal Health	National Institute of Animal Health	Uchida,Y.
EPI873319	HA	Japan	2016-Dec-22	EPI_ISL_240601	A/mute swan/Kyoto/8T/2016	National Institute of Animal Health	National Institute of Animal Health	Uchida,Y.
EPI873343	HA	Japan	2016-Dec-22	EPI_ISL_240604	A/mute swan/Kyoto/6T/2016	National Institute of Animal Health	National Institute of Animal Health	Uchida,U.
EPI873351	HA	Japan	2016-Dec-22	EPI_ISL_240605	A/mute swan/Kyoto/5T/2016	National Institute of Animal Health	National Institute of Animal Health	Uchida,U.
EPI873359	HA	Japan	2016-Dec-19	EPI_ISL_240606	A/chicken/Miyazaki/1-4C/2016	National Institute of Animal Health	National Institute of Animal Health	Uchida,U.
EPI873367	HA	Japan	2016-Dec-22	EPI_ISL_240607	A/mute swan/Kyoto/4T/2016	National Institute of Animal Health	National Institute of Animal Health	Uchida,Y.
EPI873375	HA	Japan	2016-Dec-18	EPI_ISL_240608	A/black headed gull/Ibaraki/258T/2016	National Institute of Animal Health	National Institute of Animal Health	Uchida,Y.
EPI873384	HA	Japan	2016-Dec-22	EPI_ISL_240609	A/mute swan/Kyoto/3T/2016	National Institute of Animal Health	National Institute of Animal Health	Uchida,Y.
EPI873400	HA	Japan	2016-Dec-21	EPI_ISL_240611	A/mute swan/Ibaraki/269T/2016	National Institute of Animal Health	National Institute of Animal Health	Uchida,Y.
EPI873408	HA	Japan	2016-Dec-16	EPI_ISL_240612	A/chicken/Hokkaido/1-1C2C/2016	National Institute of Animal Health	National Institute of Animal Health	Uchida,Y.
EPI873416	HA	Japan	2016-Dec-20	EPI_ISL_240613	A/black headed gull/Ibaraki/265T/2016	National Institute of Animal Health	National Institute of Animal Health	Uchida,Y.
EPI873432	HA	Japan	2016-Dec-18	EPI_ISL_240615	A/mute swan/Ibaraki/255C/2016	National Institute of Animal Health	National Institute of Animal Health	Uchida,Y.
EPI873440	HA	Japan	2016-Dec-14	EPI_ISL_240616	A/duck/Ibaraki/22/2016	National Institute of Animal Health	National Institute of Animal Health	Uchida,Y.
EPI873448	HA	Japan	2016-Dec-22	EPI_ISL_240617	A/mute swan/Kyoto/2T/2016	National Institute of Animal Health	National Institute of Animal Health	Uchida,Y.
EPI873456	HA	Japan	2016-Dec-16	EPI_ISL_240618	A/chicken/Hokkaido/1-3-7C/2016	National Institute of Animal Health	National Institute of Animal Health	Uchida,Y.
EPI873464	HA	Japan	2016-Dec-21	EPI_ISL_240619	A/black swan/Ibaraki/272C/2016	National Institute of Animal Health	National Institute of Animal Health	Uchida,Y.
EPI873480	HA	Japan	2016-Dec-19	EPI_ISL_240621	A/chicken/Miyazaki/1-7C/2016	National Institute of Animal Health	National Institute of Animal Health	Uchida,Y.
EPI873488	HA	Japan	2016-Dec-19	EPI_ISL_240622	A/chicken/Miyazaki/1-6T/2016	National Institute of Animal Health	National Institute of Animal Health	Uchida,Y.
EPI873504	HA	Japan	2016-Dec-19	EPI_ISL_240624	A/chicken/Miyazaki/1-6C/2016	National Institute of Animal Health	National Institute of Animal Health	Uchida,U.
EPI873512	HA	Japan	2016-Dec-19	EPI_ISL_240625	A/chicken/Miyazaki/1-7T/2016	National Institute of Animal Health	National Institute of Animal Health	Uchida,Y.
EPI873520	HA	Japan	2016-Dec-19	EPI_ISL_240626	A/black swan/Ibaraki/259T/2016	National Institute of Animal Health	National Institute of Animal Health	Uchida,Y.
EPI873528	HA	Japan	2016-Dec-12	EPI_ISL_240627	A/mute swan/Ibaraki/211T/2016	National Institute of Animal Health	National Institute of Animal Health	Uchida,Y.
EPI873536	HA	Japan	2016-Dec-22	EPI_ISL_240628	A/mute swan/Kyoto/1T/2016	National Institute of Animal Health	National Institute of Animal Health	Uchida,Y.
EPI926621	HA	Kazakhstan	2016-Aug-15	EPI_ISL_240679	A/graylag goose/Kazakhstan/KR/2016	Research Institute of Experimental and Clinical Medicine	Research Institute of Experimental and Clinical Medicine	Sharshov, K.; Kurskaya, O.; Sobolev, I.; Leonov, S.; Yushkov, Y.; Alekseev, A.; Alikina, T.; Kabilov, M.; Shestopalov, A.
EPI898523	HA	Vietnam	2015-Jan-24	EPI_ISL_245231	A/muscovy duck/Vietnam/NCVD-15A11/2015		Import from public-domain	Davis,T.; Jang,Y.
EPI898530	HA	Vietnam	2015-Jan-24	EPI_ISL_245232	A/muscovy duck/Vietnam/NCVD-15A12/2015		Import from public-domain	Davis,T.; Jang,Y.
EPI899083	HA	Vietnam	2015-Aug-20	EPI_ISL_245305	A/duck/Vietnam/NCVD-15A60/2015		Import from public-domain	Davis,T.; Jang,Y.
EPI942073	HA	China	2016-Feb-21	EPI_ISL_252825	A/duck/Hubei/ZYSYF2/2016		Import from public-domain	Chen,L.J.; Tian,J.H.; Lin,X.D.; Liao,Y.; Shi,M.; Zhang,Y.Z.
EPI942074	HA	China	2016-Feb-21	EPI_ISL_252826	A/duck/Hubei/ZYSYF25/2016		Import from public-domain	Chen,L.J.; Tian,J.H.; Lin,X.D.; Liao,Y.; Shi,M.; Zhang,Y.Z.
EPI942916	HA	China	2016-Jan-31	EPI_ISL_253029	A/chicken/Zhejiang/194/2016		Import from public-domain	Wu,H.; Lu,R.; Peng,X.; Chen,B.; Cheng,L.; Wu,N.
EPI942917	HA	China	2016-Jan-31	EPI_ISL_253030	A/chicken/Zhejiang/209/2016		Import from public-domain	Wu,H.; Lu,R.; Peng,X.; Chen,B.; Cheng,L.; Wu,N.
EPI942918	HA	China	2016-Jan-31	EPI_ISL_253031	A/chicken/Zhejiang/217/2016		Import from public-domain	Wu,H.; Lu,R.; Peng,X.; Chen,B.; Cheng,L.; Wu,N.
EPI942919	HA	China	2016-Jan-31	EPI_ISL_253032	A/chicken/Zhejiang/232/2016		Import from public-domain	Wu,H.; Lu,R.; Peng,X.; Chen,B.; Cheng,L.; Wu,N.
EPI946753	HA	Japan	2015-Aug-03	EPI_ISL_253945	A/chicken/Japan/AQ-HE79/2015		Import from public-domain	Shibata,A.; Hiono,T.; Okamatsu,M.; Osaka,H.; Sakoda,Y.
EPI946761	HA	Japan	2015-Nov-25	EPI_ISL_253946	A/chicken/Japan/AQ-HE144/2015		Import from public-domain	Shibata,A.; Hiono,T.; Okamatsu,M.; Osaka,H.; Sakoda,Y.
EPI946784	HA	Japan	2015-Jul-30	EPI_ISL_253949	A/duck/Japan/AQ-HE72/2015		Import from public-domain	Shibata,A.; Hiono,T.; Okamatsu,M.; Osaka,H.; Sakoda,Y.
EPI965411	HA	Bangladesh	2015-Jun-26	EPI_ISL_257046	A/duck/Bangladesh/25683/2015		Import from public-domain	Barman,S.; Marinova-Petkova,A.; Hasan,M.K.; Akhtar,S.; Turner,J.C.; Franks,J.; Walker,D.; Seiler,P.; Friedman,K.; Kercher,L.; Kayali,G.; Jones-Engel,L.; McKenzie,P.; Krauss,S.; Webby,R.J.; Feeroz,M.M.; Webster,R.G.
EPI965238	HA	Bangladesh	2015-Jul-10	EPI_ISL_257047	A/duck/Bangladesh/25893/2015		Import from public-domain	Marinova-Petkova,A.; Barman,S.; Hasan,M.K.; Akhtar,S.; Turner,J.C.; Franks,J.; Walker,D.; Seiler,P.; Friedman,K.; Kercher,L.; Kayali,G.; Jones-Engel,L.; McKenzie,P.; Krauss,S.; Webby,R.J.; Feeroz,M.M.; Webster,R.G.
EPI965403	HA	Bangladesh	2016-Feb-04	EPI_ISL_257052	A/duck/Bangladesh/28250/2016		Import from public-domain	Barman,S.; Marinova-Petkova,A.; Hasan,M.K.; Akhtar,S.; Turner,J.C.; Franks,J.; Walker,D.; Seiler,P.; Friedman,K.; Kercher,L.; Kayali,G.; Jones-Engel,L.; McKenzie,P.; Krauss,S.; Webby,R.J.; Feeroz,M.M.; Webster,R.G.
EPI965301	HA	Bangladesh	2015-Jul-11	EPI_ISL_257053	A/duck/Bangladesh/25845/2015		Import from public-domain	Marinova-Petkova,A.; Barman,S.; Hasan,M.K.; Akhtar,S.; Turner,J.C.; Franks,J.; Walker,D.; Seiler,P.; Friedman,K.; Kercher,L.; Kayali,G.; Jones-Engel,L.; McKenzie,P.; Krauss,S.; Webby,R.J.; Feeroz,M.M.; Webster,R.G.
EPI965483	HA	Bangladesh	2015-Sep-12	EPI_ISL_257054	A/duck/Bangladesh/26188/2015		Import from public-domain	Barman,S.; Marinova-Petkova,A.; Hasan,M.K.; Akhtar,S.; Turner,J.C.; Franks,J.; Walker,D.; Seiler,P.; Friedman,K.; Kercher,L.; Kayali,G.; Jones-Engel,L.; McKenzie,P.; Krauss,S.; Webby,R.J.; Feeroz,M.M.; Webster,R.G.
EPI965185	HA	Bangladesh	2015-Jul-10	EPI_ISL_257055	A/duck/Bangladesh/25890/2015		Import from public-domain	Marinova-Petkova,A.; Barman,S.; Hasan,M.K.; Akhtar,S.; Turner,J.C.; Franks,J.; Walker,D.; Seiler,P.; Friedman,K.; Kercher,L.; Kayali,G.; Jones-Engel,L.; McKenzie,P.; Krauss,S.; Webby,R.J.; Feeroz,M.M.; Webster,R.G.
EPI965528	HA	Bangladesh	2015-Jul-10	EPI_ISL_257056	A/duck/Bangladesh/25887/2015		Import from public-domain	Barman,S.; Marinova-Petkova,A.; Hasan,M.K.; Akhtar,S.; Turner,J.C.; Franks,J.; Walker,D.; Seiler,P.; Friedman,K.; Kercher,L.; Kayali,G.; Jones-Engel,L.; McKenzie,P.; Krauss,S.; Webby,R.J.; Feeroz,M.M.; Webster,R.G.
EPI965468	HA	Bangladesh	2015-Sep-12	EPI_ISL_257057	A/duck/Bangladesh/26251/2015		Import from public-domain	Barman,S.; Marinova-Petkova,A.; Hasan,M.K.; Akhtar,S.; Turner,J.C.; Franks,J.; Walker,D.; Seiler,P.; Friedman,K.; Kercher,L.; Kayali,G.; Jones-Engel,L.; McKenzie,P.; Krauss,S.; Webby,R.J.; Feeroz,M.M.; Webster,R.G.
EPI965188	HA	Bangladesh	2015-Feb-25	EPI_ISL_257058	A/duck/Bangladesh/24483/2015		Import from public-domain	Marinova-Petkova,A.; Barman,S.; Hasan,M.K.; Akhtar,S.; Turner,J.C.; Franks,J.; Walker,D.; Seiler,P.; Friedman,K.; Kercher,L.; Kayali,G.; Jones-Engel,L.; McKenzie,P.; Krauss,S.; Webby,R.J.; Feeroz,M.M.; Webster,R.G.
EPI965386	HA	Bangladesh	2015-Feb-25	EPI_ISL_257060	A/duck/Bangladesh/24482/2015		Import from public-domain	Marinova-Petkova,A.; Barman,S.; Hasan,M.K.; Akhtar,S.; Turner,J.C.; Franks,J.; Walker,D.; Seiler,P.; Friedman,K.; Kercher,L.; Kayali,G.; Jones-Engel,L.; McKenzie,P.; Krauss,S.; Webby,R.J.; Feeroz,M.M.; Webster,R.G.
EPI965413	HA	Bangladesh	2015-Dec-23	EPI_ISL_257064	A/duck/Bangladesh/27820/2015		Import from public-domain	Barman,S.; Marinova-Petkova,A.; Hasan,M.K.; Akhtar,S.; Turner,J.C.; Franks,J.; Walker,D.; Seiler,P.; Friedman,K.; Kercher,L.; Kayali,G.; Jones-Engel,L.; McKenzie,P.; Krauss,S.; Webby,R.J.; Feeroz,M.M.; Webster,R.G.
EPI965514	HA	Bangladesh	2015-Mar-22	EPI_ISL_257065	A/chicken/Bangladesh/24944/2015		Import from public-domain	Marinova-Petkova,A.; Barman,S.; Hasan,M.K.; Akhtar,S.; Turner,J.C.; Franks,J.; Walker,D.; Seiler,P.; Friedman,K.; Kercher,L.; Kayali,G.; Jones-Engel,L.; McKenzie,P.; Krauss,S.; Webby,R.J.; Feeroz,M.M.; Webster,R.G.
EPI965515	HA	Bangladesh	2015-Mar-22	EPI_ISL_257072	A/duck/Bangladesh/24958/2015		Import from public-domain	Marinova-Petkova,A.; Barman,S.; Hasan,M.K.; Akhtar,S.; Turner,J.C.; Franks,J.; Walker,D.; Seiler,P.; Friedman,K.; Kercher,L.; Kayali,G.; Jones-Engel,L.; McKenzie,P.; Krauss,S.; Webby,R.J.; Feeroz,M.M.; Webster,R.G.
EPI965234	HA	Bangladesh	2016-Feb-29	EPI_ISL_257073	A/duck/Bangladesh/28389/2016		Import from public-domain	Barman,S.; Marinova-Petkova,A.; Hasan,M.K.; Akhtar,S.; Turner,J.C.; Franks,J.; Walker,D.; Seiler,P.; Friedman,K.; Kercher,L.; Kayali,G.; Jones-Engel,L.; McKenzie,P.; Krauss,S.; Webby,R.J.; Feeroz,M.M.; Webster,R.G.
EPI965354	HA	Bangladesh	2015-Aug-25	EPI_ISL_257074	A/duck/Bangladesh/26042/2015		Import from public-domain	Barman,S.; Marinova-Petkova,A.; Hasan,M.K.; Akhtar,S.; Turner,J.C.; Franks,J.; Walker,D.; Seiler,P.; Friedman,K.; Kercher,L.; Kayali,G.; Jones-Engel,L.; McKenzie,P.; Krauss,S.; Webby,R.J.; Feeroz,M.M.; Webster,R.G.
EPI965249	HA	Bangladesh	2015-Apr-20	EPI_ISL_257078	A/goose/Bangladesh/25169/2015		Import from public-domain	Marinova-Petkova,A.; Barman,S.; Hasan,M.K.; Akhtar,S.; Turner,J.C.; Franks,J.; Walker,D.; Seiler,P.; Friedman,K.; Kercher,L.; Kayali,G.; Jones-Engel,L.; McKenzie,P.; Krauss,S.; Webby,R.J.; Feeroz,M.M.; Webster,R.G.
EPI965248	HA	Bangladesh	2015-Sep-12	EPI_ISL_257088	A/duck/Bangladesh/26182/2015		Import from public-domain	Barman,S.; Marinova-Petkova,A.; Hasan,M.K.; Akhtar,S.; Turner,J.C.; Franks,J.; Walker,D.; Seiler,P.; Friedman,K.; Kercher,L.; Kayali,G.; Jones-Engel,L.; McKenzie,P.; Krauss,S.; Webby,R.J.; Feeroz,M.M.; Webster,R.G.
EPI965289	HA	Bangladesh	2015-Mar-22	EPI_ISL_257093	A/duck/Bangladesh/24915/2015		Import from public-domain	Marinova-Petkova,A.; Barman,S.; Hasan,M.K.; Akhtar,S.; Turner,J.C.; Franks,J.; Walker,D.; Seiler,P.; Friedman,K.; Kercher,L.; Kayali,G.; Jones-Engel,L.; McKenzie,P.; Krauss,S.; Webby,R.J.; Feeroz,M.M.; Webster,R.G.
EPI965510	HA	Bangladesh	2015-Dec-23	EPI_ISL_257097	A/duck/Bangladesh/27892/2015		Import from public-domain	Barman,S.; Marinova-Petkova,A.; Hasan,M.K.; Akhtar,S.; Turner,J.C.; Franks,J.; Walker,D.; Seiler,P.; Friedman,K.; Kercher,L.; Kayali,G.; Jones-Engel,L.; McKenzie,P.; Krauss,S.; Webby,R.J.; Feeroz,M.M.; Webster,R.G.
EPI967384	HA	Japan	2017-Jan-02	EPI_ISL_257416	A/black_swan/Ibaraki/28-446T/2017	National Institute of Animal Health	National Institute of Animal Health	Saito, T.; Takemae, N.
EPI967392	HA	Japan	2017-Jan-02	EPI_ISL_257417	A/black_swan/Ibaraki/28-446C/2017	National Institute of Animal Health	National Institute of Animal Health	Saito, T.; Takemae, N.
EPI968994	HA	China	2016-Feb-27	EPI_ISL_257657	A/Pavo cristatus/Jiangxi/JA1/2016		Import from public-domain	Li,M.; Zhao,N.; Luo,J.; Li,Y.; Chen,L.; Ma,J.; Zhao,L.; Yuan,G.; Wang,C.; Wang,Y.; Liu,Y.; He,H.
EPI969242	HA	China	2015-May-01	EPI_ISL_257697	A/wild bird/Shaanxi/Qinling-1/2015		Import from public-domain	Wang,X.; Jia,Y.
EPI1027921	HA	Indonesia	2015-Apr-17	EPI_ISL_270288	A/Dk/Cimahi/C1/2016	Balai Penyidikan Penyakit Hewan dan Kesmavet (BPPHK) Dinas Peternakan Provinsi Jawa Barat	Eijkman Institute for Molecular Biology	Karo-karo,D; Bodewes,R; Muljono,D; Sriyani,I.Y; Artika,IM; Wibawa,H; Pribadi,ES;Pratomo,W; Diyantoro,D; Sugama,A; Hendrayani,N; Hidayat,A; Daju,D; Kustiawan,I;Citra,A; Stegeman,JA; Koch, G
EPI1027435	HA	Indonesia	2016-Feb-26	EPI_ISL_270289	A/Ch/Indramayu/C4c/2016	Eijkman Institute for Molecular Biology	Utrecht University-Central Veterinary Institute	Karo-karo,D; Bodewes,R; Muljono,D; Sriyani,I.Y; Artika,IM; Wibawa,H; Pribadi,ES;Pratomo,W; Diyantoro,D; Sugama,A; Hendrayani,N; Hidayat,A; Daju,D; Kustiawan,I;Citra,A; Stegeman,JA; Koch, G
EPI1027443	HA	Indonesia	2016-Feb-03	EPI_ISL_270290	A/Ch/Sukabumi/C_S4/2016	Eijkman Institute for Molecular Biology	Utrecht University-Central Veterinary Institute	Karo-karo,D; Bodewes,R; Muljono,D; Sriyani,I.Y; Artika,IM; Wibawa,H; Pribadi,ES;Pratomo,W; Diyantoro,D; Sugama,A; Hendrayani,N; Hidayat,A; Daju,D; Kustiawan,I;Citra,A; Stegeman,JA; Koch, G
EPI1027451	HA	Indonesia	2016-Feb-03	EPI_ISL_270291	A/Ch/Sukabumi/C_S5/2016	Eijkman Institute for Molecular Biology	Utrecht University-Central Veterinary Institute	Karo-karo,D; Bodewes,R; Muljono,D; Sriyani,I.Y; Artika,IM; Wibawa,H; Pribadi,ES;Pratomo,W; Diyantoro,D; Sugama,A; Hendrayani,N; Hidayat,A; Daju,D; Kustiawan,I;Citra,A; Stegeman,JA; Koch, G
EPI1027459	HA	Indonesia	2016-Jan-25	EPI_ISL_270292	A/Ch/Subang/S3/2016	Eijkman Institute for Molecular Biology	Utrecht University-Central Veterinary Institute	Karo-karo,D; Bodewes,R; Muljono,D; Sriyani,I.Y; Artika,IM; Wibawa,H; Pribadi,ES;Pratomo,W; Diyantoro,D; Sugama,A; Hendrayani,N; Hidayat,A; Daju,D; Kustiawan,I;Citra,A; Stegeman,JA; Koch, G
EPI1027467	HA	Indonesia	2016-Jan-22	EPI_ISL_270293	A/Ch/Subang/S4/2016	Eijkman Institute for Molecular Biology	Utrecht University-Central Veterinary Institute	Karo-karo,D; Bodewes,R; Muljono,D; Sriyani,I.Y; Artika,IM; Wibawa,H; Pribadi,ES;Pratomo,W; Diyantoro,D; Sugama,A; Hendrayani,N; Hidayat,A; Daju,D; Kustiawan,I;Citra,A; Stegeman,JA; Koch, G
EPI1027475	HA	Indonesia	2016-Jan-13	EPI_ISL_270294	A/Dk/Subang/S6/2016	Eijkman Institute for Molecular Biology	Utrecht University-Central Veterinary Institute	Karo-karo,D; Bodewes,R; Muljono,D; Sriyani,I.Y; Artika,IM; Wibawa,H; Pribadi,ES;Pratomo,W; Diyantoro,D; Sugama,A; Hendrayani,N; Hidayat,A; Daju,D; Kustiawan,I;Citra,A; Stegeman,JA; Koch, G
EPI1027483	HA	Indonesia	2016-Jan-25	EPI_ISL_270295	A/Ch/Subang/S7/2016	Eijkman Institute for Molecular Biology	Utrecht University-Central Veterinary Institute	Karo-karo,D; Bodewes,R; Muljono,D; Sriyani,I.Y; Artika,IM; Wibawa,H; Pribadi,ES;Pratomo,W; Diyantoro,D; Sugama,A; Hendrayani,N; Hidayat,A; Daju,D; Kustiawan,I;Citra,A; Stegeman,JA; Koch, G
EPI1027491	HA	Indonesia	2015-Dec-31	EPI_ISL_270296	A/Ch/Subang/S8/2015	Eijkman Institute for Molecular Biology	Utrecht University-Central Veterinary Institute	Karo-karo,D; Bodewes,R; Muljono,D; Sriyani,I.Y; Artika,IM; Wibawa,H; Pribadi,ES;Pratomo,W; Diyantoro,D; Sugama,A; Hendrayani,N; Hidayat,A; Daju,D; Kustiawan,I;Citra,A; Stegeman,JA; Koch, G
EPI1027499	HA	Indonesia	2015-Dec-09	EPI_ISL_270297	A/Ch/Subang/S9/2016	Eijkman Institute for Molecular Biology	Utrecht University-Central Veterinary Institute	Karo-karo,D; Bodewes,R; Muljono,D; Sriyani,I.Y; Artika,IM; Wibawa,H; Pribadi,ES;Pratomo,W; Diyantoro,D; Sugama,A; Hendrayani,N; Hidayat,A; Daju,D; Kustiawan,I;Citra,A; Stegeman,JA; Koch, G
EPI1027507	HA	Indonesia	2015-Dec-09	EPI_ISL_270298	A/Dk/Subang/S10/2015	Eijkman Institute for Molecular Biology	Utrecht University-Central Veterinary Institute	Karo-karo,D; Bodewes,R; Muljono,D; Sriyani,I.Y; Artika,IM; Wibawa,H; Pribadi,ES;Pratomo,W; Diyantoro,D; Sugama,A; Hendrayani,N; Hidayat,A; Daju,D; Kustiawan,I;Citra,A; Stegeman,JA; Koch, G
EPI1027515	HA	Indonesia	2016-Jan-23	EPI_ISL_270299	A/Ch/Subang/S11/2016	Eijkman Institute for Molecular Biology	Utrecht University-Central Veterinary Institute	Karo-karo,D; Bodewes,R; Muljono,D; Sriyani,I.Y; Artika,IM; Wibawa,H; Pribadi,ES;Pratomo,W; Diyantoro,D; Sugama,A; Hendrayani,N; Hidayat,A; Daju,D; Kustiawan,I;Citra,A; Stegeman,JA; Koch, G
EPI1027523	HA	Indonesia	2016-Jan-27	EPI_ISL_270300	A/Ch/Subang/S12/2016	Eijkman Institute for Molecular Biology	Utrecht University-Central Veterinary Institute	Karo-karo,D; Bodewes,R; Muljono,D; Sriyani,I.Y; Artika,IM; Wibawa,H; Pribadi,ES;Pratomo,W; Diyantoro,D; Sugama,A; Hendrayani,N; Hidayat,A; Daju,D; Kustiawan,I;Citra,A; Stegeman,JA; Koch, G
EPI1027531	HA	Indonesia	2016-Jan-28	EPI_ISL_270301	A/Ch/Subang/S14/2016	Eijkman Institute for Molecular Biology	Utrecht University-Central Veterinary Institute	Karo-karo,D; Bodewes,R; Muljono,D; Sriyani,I.Y; Artika,IM; Wibawa,H; Pribadi,ES;Pratomo,W; Diyantoro,D; Sugama,A; Hendrayani,N; Hidayat,A; Daju,D; Kustiawan,I;Citra,A; Stegeman,JA; Koch, G
EPI1027539	HA	Indonesia	2016-Jan-29	EPI_ISL_270302	A/Ch/Subang/S15/2016	Eijkman Institute for Molecular Biology	Utrecht University-Central Veterinary Institute	Karo-karo,D; Bodewes,R; Muljono,D; Sriyani,I.Y; Artika,IM; Wibawa,H; Pribadi,ES;Pratomo,W; Diyantoro,D; Sugama,A; Hendrayani,N; Hidayat,A; Daju,D; Kustiawan,I;Citra,A; Stegeman,JA; Koch, G
EPI1027547	HA	Indonesia	2016-Jan-31	EPI_ISL_270303	A/Ch/Subang/S18/2016	Eijkman Institute for Molecular Biology	Utrecht University-Central Veterinary Institute	Karo-karo,D; Bodewes,R; Muljono,D; Sriyani,I.Y; Artika,IM; Wibawa,H; Pribadi,ES;Pratomo,W; Diyantoro,D; Sugama,A; Hendrayani,N; Hidayat,A; Daju,D; Kustiawan,I;Citra,A; Stegeman,JA; Koch, G
EPI1027555	HA	Indonesia	2016-Feb-01	EPI_ISL_270304	A/Ch/Subang/S19/2016	Eijkman Institute for Molecular Biology	Utrecht University-Central Veterinary Institute	Karo-karo,D; Bodewes,R; Muljono,D; Sriyani,I.Y; Artika,IM; Wibawa,H; Pribadi,ES;Pratomo,W; Diyantoro,D; Sugama,A; Hendrayani,N; Hidayat,A; Daju,D; Kustiawan,I;Citra,A; Stegeman,JA; Koch, G
EPI1027563	HA	Indonesia	2016-Feb-08	EPI_ISL_270305	A/Ch/Indramayu/S21/2016	Eijkman Institute for Molecular Biology	Utrecht University-Central Veterinary Institute	Karo-karo,D; Bodewes,R; Muljono,D; Sriyani,I.Y; Artika,IM; Wibawa,H; Pribadi,ES;Pratomo,W; Diyantoro,D; Sugama,A; Hendrayani,N; Hidayat,A; Daju,D; Kustiawan,I;Citra,A; Stegeman,JA; Koch, G
EPI1027571	HA	Indonesia	2016-Feb-09	EPI_ISL_270306	A/Dk/Indramayu/S22/2016	Eijkman Institute for Molecular Biology	Utrecht University-Central Veterinary Institute	Karo-karo,D; Bodewes,R; Muljono,D; Sriyani,I.Y; Artika,IM; Wibawa,H; Pribadi,ES;Pratomo,W; Diyantoro,D; Sugama,A; Hendrayani,N; Hidayat,A; Daju,D; Kustiawan,I;Citra,A; Stegeman,JA; Koch, G
EPI1027579	HA	Indonesia	2016-Feb-11	EPI_ISL_270307	A/Ch/Indramayu/S23/2016	Eijkman Institute for Molecular Biology	Utrecht University-Central Veterinary Institute	Karo-karo,D; Bodewes,R; Muljono,D; Sriyani,I.Y; Artika,IM; Wibawa,H; Pribadi,ES;Pratomo,W; Diyantoro,D; Sugama,A; Hendrayani,N; Hidayat,A; Daju,D; Kustiawan,I;Citra,A; Stegeman,JA; Koch, G
EPI1027587	HA	Indonesia	2016-Feb-11	EPI_ISL_270308	A/Ch/Indramayu/S24/2016	Eijkman Institute for Molecular Biology	Utrecht University-Central Veterinary Institute	Karo-karo,D; Bodewes,R; Muljono,D; Sriyani,I.Y; Artika,IM; Wibawa,H; Pribadi,ES;Pratomo,W; Diyantoro,D; Sugama,A; Hendrayani,N; Hidayat,A; Daju,D; Kustiawan,I;Citra,A; Stegeman,JA; Koch, G
EPI1027595	HA	Indonesia	2016-Feb-15	EPI_ISL_270309	A/Ch/Indramayu/S25/2016	Eijkman Institute for Molecular Biology	Utrecht University-Central Veterinary Institute	Karo-karo,D; Bodewes,R; Muljono,D; Sriyani,I.Y; Artika,IM; Wibawa,H; Pribadi,ES;Pratomo,W; Diyantoro,D; Sugama,A; Hendrayani,N; Hidayat,A; Daju,D; Kustiawan,I;Citra,A; Stegeman,JA; Koch, G
EPI1027603	HA	Indonesia	2016-Feb-20	EPI_ISL_270310	A/Ch/Indramayu/S27/2016	Eijkman Institute for Molecular Biology	Utrecht University-Central Veterinary Institute	Karo-karo,D; Bodewes,R; Muljono,D; Sriyani,I.Y; Artika,IM; Wibawa,H; Pribadi,ES;Pratomo,W; Diyantoro,D; Sugama,A; Hendrayani,N; Hidayat,A; Daju,D; Kustiawan,I;Citra,A; Stegeman,JA; Koch, G
EPI1027611	HA	Indonesia	2016-Feb-25	EPI_ISL_270311	A/Dk/Indramayu/S29/2016	Eijkman Institute for Molecular Biology	Utrecht University-Central Veterinary Institute	Karo-karo,D; Bodewes,R; Muljono,D; Sriyani,I.Y; Artika,IM; Wibawa,H; Pribadi,ES;Pratomo,W; Diyantoro,D; Sugama,A; Hendrayani,N; Hidayat,A; Daju,D; Kustiawan,I;Citra,A; Stegeman,JA; Koch, G
EPI1027619	HA	Indonesia	2016-Feb-25	EPI_ISL_270312	A/Ch/Indramayu/S30/2016	Eijkman Institute for Molecular Biology	Utrecht University-Central Veterinary Institute	Karo-karo,D; Bodewes,R; Muljono,D; Sriyani,I.Y; Artika,IM; Wibawa,H; Pribadi,ES;Pratomo,W; Diyantoro,D; Sugama,A; Hendrayani,N; Hidayat,A; Daju,D; Kustiawan,I;Citra,A; Stegeman,JA; Koch, G
EPI1027627	HA	Indonesia	2016-Feb-22	EPI_ISL_270313	A/Ch/Purwakarta/S34/2016	Eijkman Institute for Molecular Biology	Utrecht University-Central Veterinary Institute	Karo-karo,D; Bodewes,R; Muljono,D; Sriyani,I.Y; Artika,IM; Wibawa,H; Pribadi,ES;Pratomo,W; Diyantoro,D; Sugama,A; Hendrayani,N; Hidayat,A; Daju,D; Kustiawan,I;Citra,A; Stegeman,JA; Koch, G
EPI1027635	HA	Indonesia	2016-Mar-13	EPI_ISL_270314	A/Dk/Indramayu/S38/2016	Eijkman Institute for Molecular Biology	Utrecht University-Central Veterinary Institute	Karo-karo,D; Bodewes,R; Muljono,D; Sriyani,I.Y; Artika,IM; Wibawa,H; Pribadi,ES;Pratomo,W; Diyantoro,D; Sugama,A; Hendrayani,N; Hidayat,A; Daju,D; Kustiawan,I;Citra,A; Stegeman,JA; Koch, G
EPI1027643	HA	Indonesia	2016-Mar-08	EPI_ISL_270315	A/Ch/Subang/S40c/2016	Eijkman Institute for Molecular Biology	Utrecht University-Central Veterinary Institute	Karo-karo,D; Bodewes,R; Muljono,D; Sriyani,I.Y; Artika,IM; Wibawa,H; Pribadi,ES;Pratomo,W; Diyantoro,D; Sugama,A; Hendrayani,N; Hidayat,A; Daju,D; Kustiawan,I;Citra,A; Stegeman,JA; Koch, G
EPI1027651	HA	Indonesia	2016-Mar-09	EPI_ISL_270316	A/Ch/Subang/S41c/2016	Eijkman Institute for Molecular Biology	Utrecht University-Central Veterinary Institute	Karo-karo,D; Bodewes,R; Muljono,D; Sriyani,I.Y; Artika,IM; Wibawa,H; Pribadi,ES;Pratomo,W; Diyantoro,D; Sugama,A; Hendrayani,N; Hidayat,A; Daju,D; Kustiawan,I;Citra,A; Stegeman,JA; Koch, G
EPI1027658	HA	Indonesia	2016-Mar-10	EPI_ISL_270317	A/Ch/Subang/S42c/2016	Eijkman Institute for Molecular Biology	Utrecht University-Central Veterinary Institute	Karo-karo,D; Bodewes,R; Muljono,D; Sriyani,I.Y; Artika,IM; Wibawa,H; Pribadi,ES;Pratomo,W; Diyantoro,D; Sugama,A; Hendrayani,N; Hidayat,A; Daju,D; Kustiawan,I;Citra,A; Stegeman,JA; Koch, G
EPI1027666	HA	Indonesia	2016-Mar-14	EPI_ISL_270318	A/Ch/Subang/S44c/2016	Eijkman Institute for Molecular Biology	Utrecht University-Central Veterinary Institute	Karo-karo,D; Bodewes,R; Muljono,D; Sriyani,I.Y; Artika,IM; Wibawa,H; Pribadi,ES;Pratomo,W; Diyantoro,D; Sugama,A; Hendrayani,N; Hidayat,A; Daju,D; Kustiawan,I;Citra,A; Stegeman,JA; Koch, G
EPI1027674	HA	Indonesia	2016-Mar-17	EPI_ISL_270319	A/Ch/Subang/S45/2016	Eijkman Institute for Molecular Biology	Utrecht University-Central Veterinary Institute	Karo-karo,D; Bodewes,R; Muljono,D; Sriyani,I.Y; Artika,IM; Wibawa,H; Pribadi,ES;Pratomo,W; Diyantoro,D; Sugama,A; Hendrayani,N; Hidayat,A; Daju,D; Kustiawan,I;Citra,A; Stegeman,JA; Koch, G
EPI1027682	HA	Indonesia	2016-Mar-18	EPI_ISL_270320	A/Ch/Indramayu/S46/2016	Eijkman Institute for Molecular Biology	Utrecht University-Central Veterinary Institute	Karo-karo,D; Bodewes,R; Muljono,D; Sriyani,I.Y; Artika,IM; Wibawa,H; Pribadi,ES;Pratomo,W; Diyantoro,D; Sugama,A; Hendrayani,N; Hidayat,A; Daju,D; Kustiawan,I;Citra,A; Stegeman,JA; Koch, G
EPI1027690	HA	Indonesia	2016-Apr-01	EPI_ISL_270321	A/Ch/Indramayu/S47/2016	Eijkman Institute for Molecular Biology	Utrecht University-Central Veterinary Institute	Karo-karo,D; Bodewes,R; Muljono,D; Sriyani,I.Y; Artika,IM; Wibawa,H; Pribadi,ES;Pratomo,W; Diyantoro,D; Sugama,A; Hendrayani,N; Hidayat,A; Daju,D; Kustiawan,I;Citra,A; Stegeman,JA; Koch, G
EPI1027698	HA	Indonesia	2016-Apr-05	EPI_ISL_270322	A/Ch/Indramayu/S50/2016	Eijkman Institute for Molecular Biology	Utrecht University-Central Veterinary Institute	Karo-karo,D; Bodewes,R; Muljono,D; Sriyani,I.Y; Artika,IM; Wibawa,H; Pribadi,ES;Pratomo,W; Diyantoro,D; Sugama,A; Hendrayani,N; Hidayat,A; Daju,D; Kustiawan,I;Citra,A; Stegeman,JA; Koch, G
EPI1027706	HA	Indonesia	2016-Apr-08	EPI_ISL_270323	A/Ch/Indramayu/S51c/2016	Eijkman Institute for Molecular Biology	Utrecht University-Central Veterinary Institute	Karo-karo,D; Bodewes,R; Muljono,D; Sriyani,I.Y; Artika,IM; Wibawa,H; Pribadi,ES;Pratomo,W; Diyantoro,D; Sugama,A; Hendrayani,N; Hidayat,A; Daju,D; Kustiawan,I;Citra,A; Stegeman,JA; Koch, G
EPI1027714	HA	Indonesia	2016-May-03	EPI_ISL_270324	A/Ch/Indramayu/S54/2016	Eijkman Institute for Molecular Biology	Utrecht University-Central Veterinary Institute	Karo-karo,D; Bodewes,R; Muljono,D; Sriyani,I.Y; Artika,IM; Wibawa,H; Pribadi,ES;Pratomo,W; Diyantoro,D; Sugama,A; Hendrayani,N; Hidayat,A; Daju,D; Kustiawan,I;Citra,A; Stegeman,JA; Koch, G
EPI1027720	HA	Indonesia	2016-Jun-08	EPI_ISL_270325	A/Ch/Indramayu/S55/2016	Eijkman Institute for Molecular Biology	Utrecht University-Central Veterinary Institute	Karo-karo,D; Bodewes,R; Muljono,D; Sriyani,I.Y; Artika,IM; Wibawa,H; Pribadi,ES;Pratomo,W; Diyantoro,D; Sugama,A; Hendrayani,N; Hidayat,A; Daju,D; Kustiawan,I;Citra,A; Stegeman,JA; Koch, G
EPI1027728	HA	Indonesia	2016-Jun-14	EPI_ISL_270326	A/Dk/Subang/S57/2016	Eijkman Institute for Molecular Biology	Utrecht University-Central Veterinary Institute	Karo-karo,D; Bodewes,R; Muljono,D; Sriyani,I.Y; Artika,IM; Wibawa,H; Pribadi,ES;Pratomo,W; Diyantoro,D; Sugama,A; Hendrayani,N; Hidayat,A; Daju,D; Kustiawan,I;Citra,A; Stegeman,JA; Koch, G
EPI1027744	HA	Indonesia	2016-Feb-28	EPI_ISL_270328	A/Mus_Dk/Indramayu/C5t/2016	Eijkman Institute for Molecular Biology	Utrecht University-Central Veterinary Institute	Karo-karo,D; Bodewes,R; Muljono,D; Sriyani,I.Y; Artika,IM; Wibawa,H; Pribadi,ES;Pratomo,W; Diyantoro,D; Sugama,A; Hendrayani,N; Hidayat,A; Daju,D; Kustiawan,I;Citra,A; Stegeman,JA; Koch, G
EPI1027753	HA	Indonesia	2016-Feb-06	EPI_ISL_270329	A/Mus_Dk/Indramayu/S20/2016	Eijkman Institute for Molecular Biology	Utrecht University-Central Veterinary Institute	Karo-karo,D; Bodewes,R; Muljono,D; Sriyani,I.Y; Artika,IM; Wibawa,H; Pribadi,ES;Pratomo,W; Diyantoro,D; Sugama,A; Hendrayani,N; Hidayat,A; Daju,D; Kustiawan,I;Citra,A; Stegeman,JA; Koch, G
EPI1027761	HA	Indonesia	2016-Feb-22	EPI_ISL_270330	A/Qu/Indramayu/S28/2016	Eijkman Institute for Molecular Biology	Utrecht University-Central Veterinary Institute	Karo-karo,D; Bodewes,R; Muljono,D; Sriyani,I.Y; Artika,IM; Wibawa,H; Pribadi,ES;Pratomo,W; Diyantoro,D; Sugama,A; Hendrayani,N; Hidayat,A; Daju,D; Kustiawan,I;Citra,A; Stegeman,JA; Koch, G
EPI1027769	HA	Indonesia	2016-Feb-25	EPI_ISL_270331	A/Mus_Dk/Indramayu/S31/2016	Eijkman Institute for Molecular Biology	Utrecht University-Central Veterinary Institute	Karo-karo,D; Bodewes,R; Muljono,D; Sriyani,I.Y; Artika,IM; Wibawa,H; Pribadi,ES;Pratomo,W; Diyantoro,D; Sugama,A; Hendrayani,N; Hidayat,A; Daju,D; Kustiawan,I;Citra,A; Stegeman,JA; Koch, G
EPI1027777	HA	Indonesia	2016-Feb-24	EPI_ISL_270332	A/Qu/Purwakarta/S35/2016	Eijkman Institute for Molecular Biology	Utrecht University-Central Veterinary Institute	Karo-karo,D; Bodewes,R; Muljono,D; Sriyani,I.Y; Artika,IM; Wibawa,H; Pribadi,ES;Pratomo,W; Diyantoro,D; Sugama,A; Hendrayani,N; Hidayat,A; Daju,D; Kustiawan,I;Citra,A; Stegeman,JA; Koch, G
EPI1027785	HA	Indonesia	2016-Mar-01	EPI_ISL_270333	A/Ch/Indramayu/S36/2016	Eijkman Institute for Molecular Biology	Utrecht University-Central Veterinary Institute	Karo-karo,D; Bodewes,R; Muljono,D; Sriyani,I.Y; Artika,IM; Wibawa,H; Pribadi,ES;Pratomo,W; Diyantoro,D; Sugama,A; Hendrayani,N; Hidayat,A; Daju,D; Kustiawan,I;Citra,A; Stegeman,JA; Koch, G
EPI1027793	HA	Indonesia	2016-Mar-16	EPI_ISL_270334	A/Ch/Indramayu/S39/2016	Eijkman Institute for Molecular Biology	Utrecht University-Central Veterinary Institute	Karo-karo,D; Bodewes,R; Muljono,D; Sriyani,I.Y; Artika,IM; Wibawa,H; Pribadi,ES;Pratomo,W; Diyantoro,D; Sugama,A; Hendrayani,N; Hidayat,A; Daju,D; Kustiawan,I;Citra,A; Stegeman,JA; Koch, G
EPI1027800	HA	Indonesia	2016-Apr-01	EPI_ISL_270335	A/Mus_Dk/Indramayu/S48/2016	Eijkman Institute for Molecular Biology	Utrecht University-Central Veterinary Institute	Karo-karo,D; Bodewes,R; Muljono,D; Sriyani,I.Y; Artika,IM; Wibawa,H; Pribadi,ES;Pratomo,W; Diyantoro,D; Sugama,A; Hendrayani,N; Hidayat,A; Daju,D; Kustiawan,I;Citra,A; Stegeman,JA; Koch, G
EPI1036750	HA	Vietnam	2015-Dec-08	EPI_ISL_273359	A/duck/Vietnam/LBM835/2015		Import from public-domain	Soda,K.; Nguyen,K.H.; Trang,H.U.; Le,Q.M.; Ito,T.; Le,Q.M.
EPI1036827	HA	Vietnam	2015-Nov-10	EPI_ISL_273360	A/duck/Vietnam/LBM806/2015		Import from public-domain	Soda,K.; Nguyen,K.H.; Trang,H.U.; Le,Q.M.; Ito,T.; Le,Q.M.
EPI1060720	HA	China	2015-Jul-03	EPI_ISL_278025	A/Duck/Zhanjiang/15577/2015	South China Agricultural University	South China Agricultural University
EPI1060731	HA	China	2016-Mar-01	EPI_ISL_278026	A/Chicken/Huizhou/16274/2016(H5N6)	South China Agricultural University	South China Agricultural University
EPI1060739	HA	China	2016-Aug-29	EPI_ISL_278027	A/Goose/Qingyuan/16875/2016	South China Agricultural University	South China Agricultural University
EPI1060753	HA	China	2016-Aug-15	EPI_ISL_278031	A/Quail/Zhanjiang/16887/2016	South China Agricultural University	South China Agricultural University
EPI1060775	HA	Hong Kong (SAR)	2015-Apr-10	EPI_ISL_278040	A/peregrine falcon/HK/4955/2015		Import from public-domain	Hui,P.Y.; Chan,L.Y.; Kuok,I.T.; Mok,K.P.; Yang,Z.; Li,R.; Luk,S.M.; Lee,F.; Yen,H.L.; Zhu,H.; Guan,Y.; Nicholls,J.; Peiris,M.; Chan,C.W.
EPI1060783	HA	Hong Kong (SAR)	2015-Apr-30	EPI_ISL_278041	A/oriental magpie robin/HK/6154/2015		Import from public-domain	Hui,P.Y.; Chan,L.Y.; Kuok,I.T.; Mok,K.P.; Yang,Z.; Li,R.; Luk,S.M.; Lee,F.; Yen,H.L.; Zhu,H.; Guan,Y.; Nicholls,J.; Peiris,M.; Chan,C.W.
EPI1082910	HA	China	2016-May-20	EPI_ISL_282394	A/goose/Yangzhou/YZ587/2016		Import from public-domain	Sun,W.
EPI1082911	HA	China	2016-Feb-13	EPI_ISL_282395	A/chicken/Xuzhou/XZ6/2016		Import from public-domain	Sun,W.
EPI1082912	HA	China	2016-Jan-09	EPI_ISL_282396	A/duck/Anhui/S4/2016		Import from public-domain	Sun,W.
EPI1082913	HA	China	2016-Mar-22	EPI_ISL_282397	A/chicken/Guangdong/GD1602/2016		Import from public-domain	Sun,W.
EPI1082961	HA	China	2016-Sep-01	EPI_ISL_282408	A/poultry/China/XY918.4/2016		Import from public-domain	Zhao,Z.
EPI1133372	HA	Japan	2017-Jan-11	EPI_ISL_290071	A/common porchard/Aichi/2301N025/2017		Import from public-domain	Soda,K.; Usui,T.; Ito,H.; Ozaki,H.; Yamaguchi,T.; Ito,T.
EPI1133380	HA	Japan	2017-Jan-12	EPI_ISL_290072	A/eastern buzzard/Oita/4401F005/2017		Import from public-domain	Soda,K.; Usui,T.; Ito,H.; Ozaki,H.; Yamaguchi,T.; Ito,T.
EPI1133608	HA	Japan	2016-Dec-11	EPI_ISL_290156	A/mute swan/Ibaraki/0803_210/2016		Import from public-domain	Soda,K.; Usui,T.; Ito,H.; Ozaki,H.; Yamagichi,T.; Ito,T.; Yamaguchi,T.
EPI1133613	HA	Japan	2016-Dec-12	EPI_ISL_290157	A/northern goshawk/Tochigi/0912A004/2016		Import from public-domain	Soda,K.; Usui,T.; Ito,H.; Ozaki,H.; Yamagichi,T.; Ito,T.; Yamaguchi,T.
EPI1134101	HA	Vietnam	2016-Aug-18	EPI_ISL_290250	A/duck/Vietnam/QuangBinh/LBM0818/2016(H5N6)		Import from public-domain	Pham,H.M.; Pham,H.K.; Nguyen.V.K.
EPI1134102	HA	Vietnam	2016-Sep-08	EPI_ISL_290251	A/duck/Vietnam/QuangBinh/LBM0908/2016(H5N6)		Import from public-domain	Pham,H.M.; Pham,H.K.; Nguyen.V.K.
EPI1134103	HA	Vietnam	2016-Sep-09	EPI_ISL_290252	A/duck/Vietnam/QuangBinh/LBM0909/2016(H5N6)		Import from public-domain	Pham,H.M.; Pham,H.K.; Nguyen.V.K.
EPI1134104	HA	Vietnam	2016-Sep-11	EPI_ISL_290253	A/duck/Vietnam/QuangBinh/LBM0911/2016(H5N6)		Import from public-domain	Pham,H.M.; Pham,H.K.; Nguyen.V.K.
EPI1134192	HA	Vietnam	2016-Sep-10	EPI_ISL_290294	A/Heron/Vietnam/QuangBinh/LBM0910/2016(H5N6)		Import from public-domain	Pham,H.M.; Pham,H.K.; Nguyen,V.K.
EPI1134196	HA	Japan	2017-Jan-13	EPI_ISL_290295	A/mute swan/Hyogo/2801ITM002/2017		Import from public-domain	Soda,K.; Usui,T.; Ito,H.; Ozaki,H.; Murase,T.; Yamaguchi,T.; Ito,T.
EPI1134204	HA	Japan	2017-Jan-14	EPI_ISL_290296	A/mute swan/Hyogo/2801ITM003/2017		Import from public-domain	Soda,K.; Usui,T.; Ito,H.; Ozaki,H.; Murase,T.; Yamaguchi,T.; Ito,T.
EPI1134212	HA	Japan	2017-Jan-14	EPI_ISL_290297	A/mute swan/Hyogo/2801ITM004/2017		Import from public-domain	Soda,K.; Usui,T.; Ito,H.; Ozaki,H.; Murase,T.; Yamaguchi,T.; Ito,T.
EPI1134220	HA	Japan	2017-Jan-15	EPI_ISL_290298	A/mute swan/Hyogo/2801ITM005/2017		Import from public-domain	Soda,K.; Usui,T.; Ito,H.; Ozaki,H.; Murase,T.; Yamaguchi,T.; Ito,T.
EPI1134228	HA	Japan	2017-Jan-15	EPI_ISL_290299	A/mute swan/Hyogo/2801ITM006/2017		Import from public-domain	Soda,K.; Usui,T.; Ito,H.; Ozaki,H.; Murase,T.; Yamaguchi,T.; Ito,T.
EPI1134236	HA	Japan	2017-Jan-17	EPI_ISL_290300	A/mute swan/Hyogo/2801ITM007/2017		Import from public-domain	Soda,K.; Usui,T.; Ito,H.; Ozaki,H.; Murase,T.; Yamaguchi,T.; Ito,T.
EPI1134244	HA	Japan	2017-Jan-17	EPI_ISL_290301	A/mute swan/Hyogo/2801ITM008/2017		Import from public-domain	Soda,K.; Usui,T.; Ito,H.; Ozaki,H.; Murase,T.; Yamaguchi,T.; Ito,T.
EPI1134252	HA	Japan	2017-Jan-17	EPI_ISL_290302	A/mute swan/Hyogo/2801ITM009/2017		Import from public-domain	Soda,K.; Usui,T.; Ito,H.; Ozaki,H.; Murase,T.; Yamaguchi,T.; Ito,T.
EPI1134293	HA	Japan	2017-Jan-17	EPI_ISL_290305	A/mute swan/Hyogo/2801ITM010/2017		Import from public-domain	Soda,K.; Usui,T.; Ito,H.; Ozaki,H.; Murase,T.; Yamaguchi,T.; Ito,T.
EPI1134301	HA	Japan	2017-Jan-17	EPI_ISL_290306	A/mute swan/Hyogo/2801ITM011/2017		Import from public-domain	Soda,K.; Usui,T.; Ito,H.; Ozaki,H.; Murase,T.; Yamaguchi,T.; Ito,T.
EPI1134349	HA	Japan	2016-Dec-01	EPI_ISL_290310	A/peregrine falcon/Niigata/15/2016		Import from public-domain	Soda,K.; Usui,T.; Ito,H.; Ozaki,H.; Yamaguchi,T.; Ito,T.
EPI1134357	HA	Japan	2016-Dec-06	EPI_ISL_290311	A/whooper swan/Niigata/5112008/2016		Import from public-domain	Soda,K.; Usui,T.; Ito,H.; Ozaki,H.; Yamaguchi,T.; Ito,T.
EPI1153490	HA	Vietnam	2015-Nov-07	EPI_ISL_293989	A/chicken/Vietnam/HU4-42/2015		Import from public-domain	Sakoda,Y.; Okamatsu,M.; Matsuno,K.; Jizou,M.
EPI1155332	HA	Japan	2016-Nov-29	EPI_ISL_294412	A/black swan/Aichi/2312T001/2016		Import from public-domain	Soda,K.; Usui,T.; Ito,H.; Ozaki,H.; Yamaguchi,T.; Ito,T.
EPI1155340	HA	Japan	2016-Dec-04	EPI_ISL_294413	A/black swan/Aichi/2312T002/2016		Import from public-domain	Soda,K.; Usui,T.; Ito,H.; Ozaki,H.; Yamaguchi,T.; Ito,T.
EPI1155348	HA	Japan	2016-Dec-06	EPI_ISL_294414	A/black swan/Aichi/2312T003/2016		Import from public-domain	Soda,K.; Usui,T.; Ito,H.; Ozaki,H.; Yamaguchi,T.; Ito,T.
EPI1172868	HA	China	2016-Feb-01	EPI_ISL_297930	A/chicken/Anhui/MZ33/2016		Import from public-domain	Liu,K.; Gu,M.; Gao,R.; Li,J.; Liu,D.; Sun,W.; Hu,J.; Xu,X.; Wang,X.; Liu,X.
EPI1172876	HA	China	2016-Feb-01	EPI_ISL_297931	A/chicken/Anhui/MZ34/2016		Import from public-domain	Liu,K.; Gu,M.; Gao,R.; Li,J.; Liu,D.; Sun,W.; Hu,J.; Xu,X.; Wang,X.; Liu,X.
EPI1172884	HA	China	2016-Mar-01	EPI_ISL_297932	A/chicken/Henan/YB0597/2016		Import from public-domain	Liu,K.; Gu,M.; Gao,R.; Li,J.; Liu,D.; Sun,W.; Hu,J.; Xu,X.; Wang,X.; Liu,X.
EPI1176517	HA	Israel	2016-Dec-20	EPI_ISL_298640	A/turkey/Israel/1045/2016		Import from public-domain	Shkoda,I.; Lapin,K.; Simanov,L.; Lublin,A.
EPI1176518	HA	Israel	2016-Dec-07	EPI_ISL_298641	A/chicken/Israel/881/2016		Import from public-domain	Shkoda,I.; Lapin,K.; Simanov,L.; Lublin,A.
EPI1176519	HA	Israel	2016-Dec-20	EPI_ISL_298642	A/chicken/Israel/1048/2016		Import from public-domain	Shkoda,I.; Lapin,K.; Simanov,L.; Lublin,A.
EPI1176524	HA	Israel	2016-Dec-19	EPI_ISL_298647	A/cormorant/Israel/1035/2016		Import from public-domain	Shkoda,I.; Lapin,K.; Simanov,L.; Lublin,A.
EPI1176525	HA	Israel	2016-Dec-25	EPI_ISL_298648	A/great egret/Israel/1088/2016		Import from public-domain	Shkoda,I.; Lapin,K.; Simanov,L.; Lublin,A.
EPI1176527	HA	Israel	2016-Dec-24	EPI_ISL_298650	A/turkey/Israel/1076/2016		Import from public-domain	Shkoda,I.; Lapin,K.; Simanov,L.; Lublin,A.
EPI1176528	HA	Israel	2016-Dec-25	EPI_ISL_298651	A/great egret/Israel/1084/2016		Import from public-domain	Shkoda,I.; Lapin,K.; Simanov,L.; Lublin,A.
EPI1176529	HA	Israel	2016-Dec-12	EPI_ISL_298652	A/grey goose/Israel/986/2016		Import from public-domain	Shkoda,I.; Lapin,K.; Simanov,L.; Lublin,A.
EPI1176530	HA	Israel	2016-Dec-25	EPI_ISL_298653	A/peregrine falcon/Israel/1086/2016		Import from public-domain	Shkoda,I.; Lapin,K.; Simanov,L.; Lublin,A.
EPI1193375	HA	China	2015-Jan-09	EPI_ISL_302495	A/Great_Cormorant/Hubei/chenhu_V2/2015_mixed	Wuhan Institute of Virology, CAS	Wuhan Institute of Virology
EPI1194721	HA	China	2015-Jan-09	EPI_ISL_302706	A/Great_Cormorant/Hubei/chenhu_V9/2015	Wuhan Institute of Virology, CAS	Wuhan Institute of Virology
EPI1194726	HA	China	2015-Jan-09	EPI_ISL_302707	A/Great_Cormorant/Hubei/chenhu_V10/2015	Wuhan Institute of Virology, CAS	Wuhan Institute of Virology
EPI1194737	HA	China	2015-Jan-09	EPI_ISL_302708	A/Great_Cormorant/Hubei/chenhu_V11/2015	Wuhan Institute of Virology, CAS	Wuhan Institute of Virology
EPI1301401	HA	Cambodia	2015-Nov-30	EPI_ISL_327635	A/chicken/Cambodia/Z850W49M1/2015		Import from public-domain	Suttie,A.; Karlsson,E.A.; Deng,Y.M.; Horm,S.V.; Yann,S.; Tok,S.; Sorn,S.; Holl,D.; Tum,S.; Hurt,A.C.; Greenhill,A.R.; Barr,I.G.; Horwood,P.F.; Dussart,P.; Suttie,A.M.; Deng,Y.-M.
EPI1301344	HA	Cambodia	2015-Feb-09	EPI_ISL_327636	A/duck/Cambodia/Z3W7M1/2015		Import from public-domain	Suttie,A.; Karlsson,E.A.; Deng,Y.M.; Horm,S.V.; Yann,S.; Tok,S.; Sorn,S.; Holl,D.; Tum,S.; Hurt,A.C.; Greenhill,A.R.; Barr,I.G.; Horwood,P.F.; Dussart,P.; Suttie,A.M.; Deng,Y.-M.
EPI1301352	HA	Cambodia	2015-Aug-24	EPI_ISL_327637	A/duck/Cambodia/Z564W35M1/2015		Import from public-domain	Suttie,A.; Karlsson,E.A.; Deng,Y.M.; Horm,S.V.; Yann,S.; Tok,S.; Sorn,S.; Holl,D.; Tum,S.; Hurt,A.C.; Greenhill,A.R.; Barr,I.G.; Horwood,P.F.; Dussart,P.; Suttie,A.M.; Deng,Y.-M.
EPI1301377	HA	Cambodia	2015-Apr-20	EPI_ISL_327639	A/chicken/Cambodia/Z207W17M1/2015		Import from public-domain	Suttie,A.; Karlsson,E.A.; Deng,Y.M.; Horm,S.V.; Yann,S.; Tok,S.; Sorn,S.; Holl,D.; Tum,S.; Hurt,A.C.; Greenhill,A.R.; Barr,I.G.; Horwood,P.F.; Dussart,P.; Suttie,A.M.; Deng,Y.-M.
EPI1319687	HA	Bangladesh	2016-May-11	EPI_ISL_331341	A/layer chicken/Bangladesh/VP02-Plaque purified H5A/ 2016	Bangladesh Agricultural University, Faculty of Veterinary Science, Department of Pathology	Friedrich-Loeffler-Institut	Parvin, Rokshana; Harder, Timm
EPI1319689	HA	Bangladesh	2016-May-12	EPI_ISL_331342	A/layer chicken/Bangladesh/VP02-Plaque purified H5C/ 2016	Bangladesh Agricultural University, Faculty of Veterinary Science, Department of Pathology	Friedrich-Loeffler-Institut	Parvin, Rokshana; Harder, Timm
EPI1319691	HA	Bangladesh	2016-May-11	EPI_ISL_331343	A/duck/Bangladesh/VP06-Plaque purified H5B/ 2016	Bangladesh Agricultural University, Faculty of Veterinary Science, Department of Pathology	Friedrich-Loeffler-Institut	Parvin, Rokshana; Harder, Timm
EPI1319693	HA	Bangladesh	2016-May-11	EPI_ISL_331344	A/duck/Bangladesh/VP06-Plaque purified H5D/ 2016	Bangladesh Agricultural University, Faculty of Veterinary Science, Department of Pathology	Friedrich-Loeffler-Institut	Parvin, Rokshana; Harder, Timm
EPI1319695	HA	Bangladesh	2016-May-11	EPI_ISL_331345	A/duck/Bangladesh/VP06-Plaque purified H5E/ 2016	Bangladesh Agricultural University, Faculty of Veterinary Science, Department of Pathology	Friedrich-Loeffler-Institut	Parvin, Rokshana; Harder, Timm
EPI1485574	HA	China	2016-Nov-24	EPI_ISL_363757	A/wild bird/Hunan/11.24 F2I10-1/2016(H5N6)	Wuhan Institute of Virology (CAS)	Wuhan Institute of Virology, CAS
EPI1485678	HA	China	2016-Dec-12	EPI_ISL_363770	A/wild bird/Hubei/12.12 LGHF2W44/2016(H5N8)	Wuhan Institute of Virology (CAS)	Wuhan Institute of Virology, CAS
EPI1486020	HA	China	2017-Jan-15	EPI_ISL_363818	A/wild bird/Hunan/01.14 YYDTHF2-20-2/2016(H5N6)	Wuhan Institute of Virology (CAS)	Wuhan Institute of Virology, CAS
EPI1486060	HA	China	2017-Jan-14	EPI_ISL_363823	A/wild bird/Hunan/01.14 YYDTHF2-25-2/2016(H5N6)	Wuhan Institute of Virology (CAS)	Wuhan Institute of Virology, CAS
EPI1489548	HA	China	2016-Oct-01	EPI_ISL_364289	A/Streptopelia decaocto/Jiangxi/G6/2016(H5N6)	Tsinghua University	Tsinghua University
EPI1508642	HA	Vietnam	2017-Jan-07	EPI_ISL_368312	A/chicken/Nha Trang/185/2017		Import from public-domain	Soda,K.; Nguyen,K.H.; Ung,H.T.; Le,Q.M.; Ito,T.
EPI1508650	HA	Vietnam	2017-Jan-12	EPI_ISL_368313	A/muscovy duck/Vietnam/LBM941/2017		Import from public-domain	Soda,K.; Nguyen,K.H.; Ung,H.T.; Le,Q.M.; Ito,T.
EPI1526780	HA	China	2015-Dec-16	EPI_ISL_372404	A/goose/Guangdong/A-Goose-Guangdong-GS013-2015-HA/2015		Import from public-domain	Jiao,P.
EPI1526785	HA	China	2015-Dec-16	EPI_ISL_372409	A/goose/Guangdong/A-Goose-Guangdong-GS014-2015-HA/2015		Import from public-domain	Jiao,P.
EPI1526816	HA	China	2015-Dec-16	EPI_ISL_372430	A/goose/Guangdong/A-Goose-Guangdong-GS017-2015(H5N6)-HA/2015		Import from public-domain	Jiao,P.
EPI1526824	HA	China	2015-Dec-16	EPI_ISL_372438	A/goose/Guangdong/A-Goose-Guangdong-GS114-2015(H5N6)-HA/2015		Import from public-domain	Jiao,P.
EPI1526832	HA	China	2015-Dec-16	EPI_ISL_372446	A/goose/Guangdong/A-Goose-Guangdong-GS116-2015(H5N6)-HA/2015		Import from public-domain	Jiao,P.
EPI1526840	HA	China	2015-Dec-16	EPI_ISL_372454	A/goose/Guangdong/A-Goose-Guangdong-GS120-2015(H5N6)-HA/2015		Import from public-domain	Jiao,P.
EPI1526848	HA	China	2015-Dec-16	EPI_ISL_372462	A/goose/Guangdong/A-Goose-Guangdong-GS119-2015(H5N6)-HA/2015		Import from public-domain	Jiao,P.
EPI1526853	HA	China	2015-Dec-16	EPI_ISL_372467	A/goose/Guangdong/A-Goose-Guangdong-GS144-2015(H5N6)-HA/2015		Import from public-domain	Jiao,P.
EPI1526861	HA	China	2016-Jan-08	EPI_ISL_372475	A/goose/Guangdong/A-Goose-Guangdong-GS148-2016(H5N6)-HA/2016		Import from public-domain	Jiao,P.
EPI1526872	HA	China	2015-Dec-16	EPI_ISL_372486	A/goose/Guangdong/A-Goose-Guangdong-GS018-2015(H5N6)-HA/2015		Import from public-domain	Jiao,P.
EPI1536938	HA	China	2016-Jan-01	EPI_ISL_376189	A/duck/China/waterfowl/2016		Import from public-domain	Liu,K.; Gao,R.; Gu,M.; Li,J.; Shi,L.; Sun,W.; Liu,D.; Gao,Z.; Wang,X.; Hu,J.; Liu,X.; Hu,S.
EPI1556380	HA	China	2016-May-01	EPI_ISL_379790	A/chicken/China/6285/2016		Import from public-domain	Zhang,Z.; Liu,D.; Liu,X.; He,L.
EPI1556524	HA	Bangladesh	2015-May-16	EPI_ISL_379822	A/Duck/Bangladesh/D4/2015		Import from public-domain	Nooruzzaman,M.; Mumu,T.T.; Hasnat,A.; Akter,M.N.; Rasel,M.S.U.; Rahman,M.M.; Parvin,R.; Chowdhury,E.H.; Islam,M.R.
EPI1557211	HA	Vietnam	2015-Nov-11	EPI_ISL_379963	A/duck/Vietnam/HU4-879/2015		Import from public-domain	Sakoda,Y.; Okamatsu,M.; Matsuno,K.; Chu,D.H.; Nguyen,L.T.; Jizou,M.
EPI1583506	HA	Vietnam	2016-Oct-03	EPI_ISL_389079	A/chicken/Nghe An/11VTC/2016	State Research Center of Virology and Biotechnology (VECTOR)	State Research Center of Virology and Biotechnology (VECTOR)
EPI1583529	HA	Vietnam	2015-Jan-28	EPI_ISL_389082	A/chicken/Nghe An/14VTC/2015	State Research Center of Virology and Biotechnology (VECTOR)	State Research Center of Virology and Biotechnology (VECTOR)
EPI1583598	HA	Vietnam	2015-Nov-17	EPI_ISL_389110	A/chicken/Ha Tinh/16VTC/2015	State Research Center of Virology and Biotechnology (VECTOR)	State Research Center of Virology and Biotechnology (VECTOR)
EPI1583606	HA	Vietnam	2015-Nov-17	EPI_ISL_389111	A/chicken/Nghe An/17VTC/2015	State Research Center of Virology and Biotechnology (VECTOR)	State Research Center of Virology and Biotechnology (VECTOR)
EPI1583614	HA	Vietnam	2015-Sep-01	EPI_ISL_389112	A/chicken/Ha Tinh/18VTC/2015	State Research Center of Virology and Biotechnology (VECTOR)	State Research Center of Virology and Biotechnology (VECTOR)
EPI1583628	HA	Vietnam	2015-Sep-27	EPI_ISL_389116	A/chicken/Ha Tinh/19VTC/2015	State Research Center of Virology and Biotechnology (VECTOR)	State Research Center of Virology and Biotechnology (VECTOR)
EPI1583636	HA	Vietnam	2015-Sep-09	EPI_ISL_389117	A/chicken/Ha Tinh/20VTC/2015	State Research Center of Virology and Biotechnology (VECTOR)	State Research Center of Virology and Biotechnology (VECTOR)
EPI1639799	HA	China	2015-Jan-05	EPI_ISL_400477	A/Whooper swan/Henan/1/2015	Harbin Veterinary Research Institute (CAAS)	Harbin Veterinary Research Institute (CAAS)	Yanbing,Li;Yanfang,Cui;Yulei,Li;Minghui,Li;Lu,Zhao;Deli,Wang
EPI1639815	HA	China	2015-May-28	EPI_ISL_400478	A/Bar-headed goose/Tibet/3/2015	Harbin Veterinary Research Institute (CAAS)	Harbin Veterinary Research Institute (CAAS)	Yanbing,Li;Yanfang,Cui;Yulei,Li;Minghui,Li;Lu,Zhao;Deli,Wang
EPI1639823	HA	China	2015-May-28	EPI_ISL_400479	A/Brown headed gull/Tibet/4/2015	Harbin Veterinary Research Institute (CAAS)	Harbin Veterinary Research Institute (CAAS)	Yanbing,Li;Yanfang,Cui;Yulei,Li;Minghui,Li;Lu,Zhao;Deli,Wang
EPI1639831	HA	China	2015-May-28	EPI_ISL_400480	A/Bar-headed goose/Tibet/5/2015	Harbin Veterinary Research Institute (CAAS)	Harbin Veterinary Research Institute (CAAS)	Yanbing,Li;Yanfang,Cui;Yulei,Li;Minghui,Li;Lu,Zhao;Deli,Wang
EPI1639839	HA	China	2015-Jun-13	EPI_ISL_400481	A/Black swan/Jiangsu/5/2015	Harbin Veterinary Research Institute (CAAS)	Harbin Veterinary Research Institute (CAAS)	Yanbing,Li;Yanfang,Cui;Yulei,Li;Minghui,Li;Lu,Zhao;Deli,Wang
EPI1639847	HA	China	2015-Jun-13	EPI_ISL_400482	A/Grey goose/Jiangsu/6/2015	Harbin Veterinary Research Institute (CAAS)	Harbin Veterinary Research Institute (CAAS)	Yanbing,Li;Yanfang,Cui;Yulei,Li;Minghui,Li;Lu,Zhao;Deli,Wang
EPI1639863	HA	China	2015-Jun-13	EPI_ISL_400483	A/Common pheasant/Jiangsu/8/2015	Harbin Veterinary Research Institute (CAAS)	Harbin Veterinary Research Institute (CAAS)	Yanbing,Li;Yanfang,Cui;Yulei,Li;Minghui,Li;Lu,Zhao;Deli,Wang
EPI1639871	HA	China	2015-Jul-16	EPI_ISL_400484	A/Great black-headed gull/Qinghai/9/2015	Harbin Veterinary Research Institute (CAAS)	Harbin Veterinary Research Institute (CAAS)	Yanbing,Li;Yanfang,Cui;Yulei,Li;Minghui,Li;Lu,Zhao;Deli,Wang
EPI1639879	HA	China	2015-Dec-03	EPI_ISL_400485	A/Green pheasant/Hunan/10/2015	Harbin Veterinary Research Institute (CAAS)	Harbin Veterinary Research Institute (CAAS)	Yanbing,Li;Yanfang,Cui;Yulei,Li;Minghui,Li;Lu,Zhao;Deli,Wang
EPI1639887	HA	China	2015-Dec-03	EPI_ISL_400486	A/Common pheasant/Hunan/11/2015	Harbin Veterinary Research Institute (CAAS)	Harbin Veterinary Research Institute (CAAS)	Yanbing,Li;Yanfang,Cui;Yulei,Li;Minghui,Li;Lu,Zhao;Deli,Wang
EPI1639935	HA	China	2016-Jan-27	EPI_ISL_400487	A/Common pheasant/Hunan/2/2016	Harbin Veterinary Research Institute (CAAS)	Harbin Veterinary Research Institute (CAAS)	Yanbing,Li;Yanfang,Cui;Yulei,Li;Minghui,Li;Lu,Zhao;Deli,Wang
EPI1639943	HA	China	2016-Jan-27	EPI_ISL_400488	A/Silver Pheasant/Hunan/3/2016	Harbin Veterinary Research Institute (CAAS)	Harbin Veterinary Research Institute (CAAS)	Yanbing,Li;Yanfang,Cui;Yulei,Li;Minghui,Li;Lu,Zhao;Deli,Wang
EPI1639951	HA	China	2016-Jan-27	EPI_ISL_400489	A/Whooper Swan/Hunan/4/2016	Harbin Veterinary Research Institute (CAAS)	Harbin Veterinary Research Institute (CAAS)	Yanbing,Li;Yanfang,Cui;Yulei,Li;Minghui,Li;Lu,Zhao;Deli,Wang
EPI1639959	HA	China	2016-Dec-24	EPI_ISL_400490	A/Whooper swan/Shanxi/6/2016	Harbin Veterinary Research Institute (CAAS)	Harbin Veterinary Research Institute (CAAS)	Yanbing,Li;Yanfang,Cui;Yulei,Li;Minghui,Li;Lu,Zhao;Deli,Wang
EPI1639967	HA	China	2016-Dec-24	EPI_ISL_400491	A/Whooper swan/Shanxi/7/2016	Harbin Veterinary Research Institute (CAAS)	Harbin Veterinary Research Institute (CAAS)	Yanbing,Li;Yanfang,Cui;Yulei,Li;Minghui,Li;Lu,Zhao;Deli,Wang
EPI1639975	HA	China	2017-Jan-08	EPI_ISL_400492	A/Greylag goose/Hunan/1/2017	Harbin Veterinary Research Institute (CAAS)	Harbin Veterinary Research Institute (CAAS)	Yanbing,Li;Yanfang,Cui;Yulei,Li;Minghui,Li;Lu,Zhao;Deli,Wang
EPI1639983	HA	China	2017-Jan-12	EPI_ISL_400493	A/Black swan/Hubei/2/2017	Harbin Veterinary Research Institute (CAAS)	Harbin Veterinary Research Institute (CAAS)	Yanbing,Li;Yanfang,Cui;Yulei,Li;Minghui,Li;Lu,Zhao;Deli,Wang
EPI1639991	HA	China	2017-Jan-12	EPI_ISL_400494	A/Black swan/Hubei/3/2017	Harbin Veterinary Research Institute (CAAS)	Harbin Veterinary Research Institute (CAAS)	Yanbing,Li;Yanfang,Cui;Yulei,Li;Minghui,Li;Lu,Zhao;Deli,Wang
EPI1639807	HA	China	2015-May-27	EPI_ISL_400546	A/Black necked-grebe/Inner mongolia/2/2015	Harbin Veterinary Research Institute (CAAS)	Harbin Veterinary Research Institute (CAAS)	Yanbing,Li;Yanfang,Cui;Yulei,Li;Minghui,Li;Lu,Zhao;Deli,Wang
EPI1639855	HA	China	2015-Jun-13	EPI_ISL_400547	A/Peacock/Jiangsu/7/2015	Harbin Veterinary Research Institute (CAAS)	Harbin Veterinary Research Institute (CAAS)	Yanbing,Li;Yanfang,Cui;Yulei,Li;Minghui,Li;Lu,Zhao;Deli,Wang
EPI1639895	HA	China	2015-Dec-03	EPI_ISL_400548	A/Peacock/Hunan/12/2015	Harbin Veterinary Research Institute (CAAS)	Harbin Veterinary Research Institute (CAAS)	Yanbing,Li;Yanfang,Cui;Yulei,Li;Minghui,Li;Lu,Zhao;Deli,Wang
EPI1639903	HA	China	2015-Dec-03	EPI_ISL_400549	A/Peacock/Hunan/13/2015	Harbin Veterinary Research Institute (CAAS)	Harbin Veterinary Research Institute (CAAS)	Yanbing,Li;Yanfang,Cui;Yulei,Li;Minghui,Li;Lu,Zhao;Deli,Wang
EPI1639911	HA	China	2015-Dec-03	EPI_ISL_400550	A/Peacock/Hunan/15/2015	Harbin Veterinary Research Institute (CAAS)	Harbin Veterinary Research Institute (CAAS)	Yanbing,Li;Yanfang,Cui;Yulei,Li;Minghui,Li;Lu,Zhao;Deli,Wang
EPI1639919	HA	China	2015-Dec-03	EPI_ISL_400551	A/Peacock/Hunan/14/2015	Harbin Veterinary Research Institute (CAAS)	Harbin Veterinary Research Institute (CAAS)	Yanbing,Li;Yanfang,Cui;Yulei,Li;Minghui,Li;Lu,Zhao;Deli,Wang
EPI1639927	HA	China	2016-Jan-27	EPI_ISL_400552	A/Peacock/Hunan/1/2016	Harbin Veterinary Research Institute (CAAS)	Harbin Veterinary Research Institute (CAAS)	Yanbing,Li;Yanfang,Cui;Yulei,Li;Minghui,Li;Lu,Zhao;Deli,Wang
EPI1640440	HA	Indonesia	2015-Jan-15	EPI_ISL_400639	A/duck/East_Java/414/2015	Institute of Tropical Disease, Universitas Airlangga	Kobe University Graduate School of Medicine	ED,Poetranto;AY,Candra;K,Rahardjo;RR,Prasetya;AM,Nastri;JR,Dewantari;AL,Poetranto;L,Wulandari;G,Soegiarto;YK,Shimizu;Y,Mori;K,Shimizu
EPI1640448	HA	Indonesia	2015-Jan-15	EPI_ISL_400640	A/duck/East_Java/415/2015	Institute of Tropical Disease, Universitas Airlangga	Kobe University Graduate School of Medicine	ED,Poetranto;AY,Candra;K,Rahardjo;RR,Prasetya;AM,Nastri;JR,Dewantari;AL,Poetranto;L,Wulandari;G,Soegiarto;YK,Shimizu;Y,Mori;K,Shimizu
EPI1640456	HA	Indonesia	2015-Jan-18	EPI_ISL_400641	A/chicken/East_Java/Av501/2015	Institute of Tropical Disease, Universitas Airlangga	Kobe University Graduate School of Medicine
EPI1640464	HA	Indonesia	2015-Jan-31	EPI_ISL_400642	A/chicken/East_Java/Av526/2015	Institute of Tropical Disease, Universitas Airlangga	Kobe University Graduate School of Medicine	ED,Poetranto;AY,Candra;K,Rahardjo;RR,Prasetya;AM,Nastri;JR,Dewantari;AL,Poetranto;L,Wulandari;G,Soegiarto;YK,Shimizu;Y,Mori;K,Shimizu
EPI1640472	HA	Indonesia	2015-Jan-31	EPI_ISL_400643	A/chicken/East_Java/Av537/2015	Institute of Tropical Disease, Universitas Airlangga	Kobe University Graduate School of Medicine	ED,Poetranto;AY,Candra;K,Rahardjo;RR,Prasetya;AM,Nastri;JR,Dewantari;AL,Poetranto;L,Wulandari;G,Soegiarto;YK,Shimizu;Y,Mori;K,Shimizu
EPI1640488	HA	Indonesia	2015-Jan-15	EPI_ISL_400645	A/duck/East_Java/Av413/2015	Institute of Tropical Disease, Universitas Airlangga	Kobe University Graduate School of Medicine	ED,Poetranto;AY,Candra;K,Rahardjo;RR,Prasetya;AM,Nastri;JR,Dewantari;AL,Poetranto;L,Wulandari;G,Soegiarto;YK,Shimizu;Y,Mori;K,Shimizu
EPI1640496	HA	Indonesia	2015-Jan-15	EPI_ISL_400646	A/duck/East_Java/Av416/2015	Institute of Tropical Disease, Universitas Airlangga	Kobe University Graduate School of Medicine	ED,Poetranto;AY,Candra;K,Rahardjo;RR,Prasetya;AM,Nastri;JR,Dewantari;AL,Poetranto;L,Wulandari;G,Soegiarto;YK,Shimizu;Y,Mori;K,Shimizu
EPI1640504	HA	Indonesia	2015-Jan-15	EPI_ISL_400647	A/duck/East_Java/Av418/2015	Institute of Tropical Disease, Universitas Airlangga	Kobe University Graduate School of Medicine	ED,Poetranto;AY,Candra;K,Rahardjo;RR,Prasetya;AM,Nastri;JR,Dewantari;AL,Poetranto;L,Wulandari;G,Soegiarto;YK,Shimizu;Y,Mori;K,Shimizu
EPI1640673	HA	Indonesia	2015-Jan-16	EPI_ISL_400687	A/chicken/East_Java/Av464/2015	Institute of Tropical Disease, Universitas Airlangga	Kobe University Graduate School of Medicine	ED,Poetranto;AY,Candra;K,Rahardjo;RR,Prasetya;AM,Nastri;JR,Dewantari;AL,Poetranto;L,Wulandari;G,Soegiarto;YK,Shimizu;Y,Mori;K,Shimizu
EPI1640683	HA	Indonesia	2015-Jan-16	EPI_ISL_400688	A/chicken/East_Java/Av468/2015	Institute of Tropical Disease, Universitas Airlangga	Kobe University Graduate School of Medicine	ED,Poetranto;AY,Candra;K,Rahardjo;RR,Prasetya;AM,Nastri;JR,Dewantari;AL,Poetranto;L,Wulandari;G,Soegiarto;YK,Shimizu;Y,Mori;K,Shimizu
EPI1640691	HA	Indonesia	2015-Jan-16	EPI_ISL_400689	A/duck/East_Java/Av469/2015	Institute of Tropical Disease, Universitas Airlangga	Kobe University Graduate School of Medicine	ED,Poetranto;AY,Candra;K,Rahardjo;RR,Prasetya;AM,Nastri;JR,Dewantari;AL,Poetranto;L,Wulandari;G,Soegiarto;YK,Shimizu;Y,Mori;K,Shimizu
EPI1640699	HA	Indonesia	2015-Jan-17	EPI_ISL_400690	A/chicken/East_Java/Av476/2015	Institute of Tropical Disease, Universitas Airlangga	Kobe University Graduate School of Medicine	ED,Poetranto;AY,Candra;K,Rahardjo;RR,Prasetya;AM,Nastri;JR,Dewantari;AL,Poetranto;L,Wulandari;G,Soegiarto;YK,Shimizu;Y,Mori;K,Shimizu
EPI1640708	HA	Indonesia	2015-Jan-17	EPI_ISL_400692	A/duck/East_Java/Av486/2015	Institute of Tropical Disease, Universitas Airlangga	Kobe University Graduate School of Medicine	ED,Poetranto;AY,Candra;K,Rahardjo;RR,Prasetya;AM,Nastri;JR,Dewantari;AL,Poetranto;L,Wulandari;G,Soegiarto;YK,Shimizu;Y,Mori;K,Shimizu
EPI1640719	HA	Indonesia	2015-Jan-18	EPI_ISL_400693	A/duck/East_Java/Av487/2015	Institute of Tropical Disease, Universitas Airlangga	Kobe University Graduate School of Medicine	ED,Poetranto;AY,Candra;K,Rahardjo;RR,Prasetya;AM,Nastri;JR,Dewantari;AL,Poetranto;L,Wulandari;G,Soegiarto;YK,Shimizu;Y,Mori;K,Shimizu
EPI1640777	HA	Indonesia	2015-Aug-07	EPI_ISL_400701	A/duck/East_Java/Av601/2015	Institute of Tropical Disease, Universitas Airlangga	Kobe University Graduate School of Medicine	ED,Poetranto;AY,Candra;K,Rahardjo;RR,Prasetya;AM,Nastri;JR,Dewantari;AL,Poetranto;L,Wulandari;G,Soegiarto;YK,Shimizu;Y,Mori;K,Shimizu
EPI1640813	HA	Indonesia	2016-Jan-22	EPI_ISL_400706	A/chicken/East_Java/Av746/2016	Institute of Tropical Disease, Universitas Airlangga	Kobe University Graduate School of Medicine	ED,Poetranto;AY,Candra;K,Rahardjo;RR,Prasetya;AM,Nastri;JR,Dewantari;AL,Poetranto;L,Wulandari;G,Soegiarto;YK,Shimizu;Y,Mori;K,Shimizu
EPI1640852	HA	Indonesia	2016-Dec-24	EPI_ISL_400710	A/chicken/East_Java/Av960/2016	Institute of Tropical Disease, Universitas Airlangga	Kobe University Graduate School of Medicine	ED,Poetranto;K,Rahardjo;RR,Prasetya;AM,Nastri;JR,Dewantari;AL,Poetranto;L,Wulandari;G,Soegiarto;YK,Shimizu;Y,Mori;K,Shimizu
EPI1640901	HA	Indonesia	2016-Jan-19	EPI_ISL_400716	A/duck/East_Java/Av710/2016	Institute of Tropical Disease, Universitas Airlangga	Kobe University Graduate School of Medicine	ED,Poetranto;AY,Candra;K,Rahardjo;RR,Prasetya;AM,Nastri;JR,Dewantari;AL,Poetranto;L,Wulandari;G,Soegiarto;YK,Shimizu;Y,Mori;K,Shimizu
EPI1640909	HA	Indonesia	2016-Jan-19	EPI_ISL_400717	A/duck/East_Java/Av714/2016	Institute of Tropical Disease, Universitas Airlangga	Kobe University Graduate School of Medicine	ED,Poetranto;AY,Candra;K,Rahardjo;RR,Prasetya;AM,Nastri;JR,Dewantari;AL,Poetranto;L,Wulandari;G,Soegiarto;YK,Shimizu;Y,Mori;K,Shimizu
EPI1640917	HA	Indonesia	2016-Jan-20	EPI_ISL_400718	A/muscovy_duck/East_Java/Av724/2016	Institute of Tropical Disease, Universitas Airlangga	Kobe University Graduate School of Medicine	ED,Poetranto;AY,Candra;K,Rahardjo;RR,Prasetya;AM,Nastri;JR,Dewantari;AL,Poetranto;L,Wulandari;G,Soegiarto;YK,Shimizu;Y,Mori;K,Shimizu
EPI1640933	HA	Indonesia	2016-Jul-31	EPI_ISL_400720	A/chicken/East_Java/Av833/2016	Institute of Tropical Disease, Universitas Airlangga	Kobe University Graduate School of Medicine	ED,Poetranto;K,Rahardjo;RR,Prasetya;AM,Nastri;JR,Dewantari;AL,Poetranto;L,Wulandari;G,Soegiarto;YK,Shimizu;Y,Mori;K,Shimizu
EPI1640941	HA	Indonesia	2016-Aug-03	EPI_ISL_400721	A/duck/East_Java/Av844/2016	Institute of Tropical Disease, Universitas Airlangga	Kobe University Graduate School of Medicine	ED,Poetranto;K,Rahardjo;RR,Prasetya;AM,Nastri;JR,Dewantari;AL,Poetranto;L,Wulandari;G,Soegiarto;YK,Shimizu;Y,Mori;K,Shimizu
EPI1640949	HA	Indonesia	2016-Aug-06	EPI_ISL_400722	A/chicken/East_Java/Av868/2016	Institute of Tropical Disease, Universitas Airlangga	Kobe University Graduate School of Medicine	ED,Poetranto;K,Rahardjo;RR,Prasetya;AM,Nastri;JR,Dewantari;AL,Poetranto;L,Wulandari;G,Soegiarto;YK,Shimizu;Y,Mori;K,Shimizu
EPI1640957	HA	Indonesia	2016-Aug-19	EPI_ISL_400723	A/chicken/East_Java/Av884/2016	Institute of Tropical Disease, Universitas Airlangga	Kobe University Graduate School of Medicine	ED,Poetranto;K,Rahardjo;RR,Prasetya;AM,Nastri;JR,Dewantari;AL,Poetranto;L,Wulandari;G,Soegiarto;YK,Shimizu;Y,Mori;K,Shimizu
EPI1640965	HA	Indonesia	2016-Dec-17	EPI_ISL_400724	A/duck/East_Java/Av934/2016	Institute of Tropical Disease, Universitas Airlangga	Kobe University Graduate School of Medicine	ED,Poetranto;K,Rahardjo;RR,Prasetya;AM,Nastri;JR,Dewantari;AL,Poetranto;L,Wulandari;G,Soegiarto;YK,Shimizu;Y,Mori;K,Shimizu
EPI1640973	HA	Indonesia	2016-Dec-17	EPI_ISL_400725	A/duck/East_Java/Av940/2016	Institute of Tropical Disease, Universitas Airlangga	Kobe University Graduate School of Medicine	ED,Poetranto;K,Rahardjo;RR,Prasetya;AM,Nastri;JR,Dewantari;AL,Poetranto;L,Wulandari;G,Soegiarto;YK,Shimizu;Y,Mori;K,Shimizu
[truncated: 2,945 more rows]

## Sheet: NA
We gratefully acknowledge the following authors and the originating and submitting laboratories of the sequences obtained from the GISAID’s EpiFlu™ Database on which this research is based.
All submitters of data may be contacted directly via www.gisaid.org
Supplemental Table 1: List of sequences obtained from the GISAID’s EpiFlu™ Database.
Segment ID	Segment	Country	Collection date	Isolate-ID	Isolate name	Originating Lab	Submitting Lab	Authors
EPI668742	NA	China	2015-Feb-09	EPI_ISL_200819	A/chicken/Yunnan/02.09 DQXY008L/2015(H5N6)		Institute of Microbiology, Chinese Academy of Sciences
EPI668750	NA	China	2015-Jul-14	EPI_ISL_200820	A/goose/Yunnan/07.14 DQWCK119/2015(H5N6)		Institute of Microbiology, Chinese Academy of Sciences
EPI668757	NA	China	2015-Jul-14	EPI_ISL_200821	A/goose/Yunnan/07.14 DQWCK122/2015(H5N6)		Institute of Microbiology, Chinese Academy of Sciences
EPI668766	NA	China	2015-Jul-15	EPI_ISL_200822	A/duck/Yunnan/07.15 DQNPH124/2015(H5N6)		Institute of Microbiology, Chinese Academy of Sciences
EPI668773	NA	China	2015-Jul-15	EPI_ISL_200823	A/duck/Yunnan/07.15 DQNPH125/2015(H5N6)		Institute of Microbiology, Chinese Academy of Sciences
EPI668782	NA	China	2015-Jul-15	EPI_ISL_200824	A/duck/Yunnan/07.15 DQNPH127/2015(H5N6)		Institute of Microbiology, Chinese Academy of Sciences
EPI668790	NA	China	2015-Jul-15	EPI_ISL_200825	A/duck/Yunnan/07.15 DQNPH129/2015(H5N6)		Institute of Microbiology, Chinese Academy of Sciences
EPI668822	NA	China	2015-Jul-11	EPI_ISL_200829	A/chicken/Yunnan/07.11 DQENM005/2015(H5N6)		Institute of Microbiology, Chinese Academy of Sciences
EPI671532	NA	China	2015-May-07	EPI_ISL_201355	A/duck/Fujian/05.07 FZHMDK14-O/2015(H5N6)		Institute of Microbiology, Chinese Academy of Sciences
EPI671540	NA	China	2015-May-07	EPI_ISL_201356	A/duck/Fujian/05.07 FZHMD4K-O/2015(Mixed)		Institute of Microbiology, Chinese Academy of Sciences
EPI671548	NA	China	2015-May-07	EPI_ISL_201357	A/duck/Fujian/05.07 FZHMD7K-O/2015(Mixed)		Institute of Microbiology, Chinese Academy of Sciences
EPI671556	NA	China	2015-May-07	EPI_ISL_201358	A/duck/Fujian/05.07 FZHMD12AK-O/2015(Mixed)		Institute of Microbiology, Chinese Academy of Sciences
EPI671572	NA	China	2015-May-07	EPI_ISL_201360	A/goose/Fujian/05.07 FZHGK2-O/2015(H6N6)		Institute of Microbiology, Chinese Academy of Sciences
EPI671580	NA	China	2015-May-07	EPI_ISL_201361	A/goose/Fujian/05.07 FZHGAK2-O/2015(H6N6)		Institute of Microbiology, Chinese Academy of Sciences
EPI671588	NA	China	2015-May-07	EPI_ISL_201362	A/goose/Fujian/05.07 FZHG3K-O/2015(Mixed)		Institute of Microbiology, Chinese Academy of Sciences
EPI671604	NA	China	2015-May-07	EPI_ISL_201364	A/chicken/Fujian/05.07 FZHC11K-O/2015(Mixed)		Institute of Microbiology, Chinese Academy of Sciences
EPI671660	NA	China	2015-Mar-11	EPI_ISL_201371	A/duck/Jiangxi/03.11 NCHJX-15-06/2015(Mixed)	CAS Key Laboratory of Pathogenic Microbiology and Immunology, Institute of Microbiology, Chinese Academy of Sciences	Institute of Microbiology, Chinese Academy of Sciences	Bi, Yuhai
EPI671668	NA	China	2015-Mar-18	EPI_ISL_201372	A/duck/Fujian/03.18 GTFJ-15-10/2015(Mixed)	CAS Key Laboratory of Pathogenic Microbiology and Immunology, Institute of Microbiology, Chinese Academy of Sciences	Institute of Microbiology, Chinese Academy of Sciences	Bi, Yuhai
EPI671676	NA	China	2015-Feb-28	EPI_ISL_201373	A/duck/Zhejiang/02.28 JHZJ-15-04/2015(Mixed)	CAS Key Laboratory of Pathogenic Microbiology and Immunology, Institute of Microbiology, Chinese Academy of Sciences	Institute of Microbiology, Chinese Academy of Sciences	Bi, Yuhai
EPI671684	NA	China	2015-Jan-09	EPI_ISL_201374	A/goose/Jiangxi/01.09 NFJX-15-01/2015(Mixed)	CAS Key Laboratory of Pathogenic Microbiology and Immunology, Institute of Microbiology, Chinese Academy of Sciences	Institute of Microbiology, Chinese Academy of Sciences	Bi, Yuhai
EPI683017	NA	China	2015-Jan-01	EPI_ISL_205115	A/duck/Wuhan/WHYF02/2015		Import from public-domain	Chen,L.-J.; Lin,X.-D.; Guo,W.-P.; Tian,J.-H.; Zhang,Y.-Z.
EPI683018	NA	China	2015-Jan-01	EPI_ISL_205116	A/duck/Wuhan/WHYF03/2015		Import from public-domain	Chen,L.-J.; Lin,X.-D.; Guo,W.-P.; Tian,J.-H.; Zhang,Y.-Z.
EPI683015	NA	China	2015-Jan-01	EPI_ISL_205117	A/chicken/Wuhan/WHYJ01/2015		Import from public-domain	Chen,L.-J.; Lin,X.-D.; Guo,W.-P.; Tian,J.-H.; Zhang,Y.-Z.
EPI683016	NA	China	2015-Jan-01	EPI_ISL_205118	A/chicken/Wuhan/WHYJ02/2015		Import from public-domain	Chen,L.-J.; Lin,X.-D.; Guo,W.-P.; Tian,J.-H.; Zhang,Y.-Z.
EPI683020	NA	China	2015-Jan-01	EPI_ISL_205120	A/duck/Wuhan/JXYFB22/2015		Import from public-domain	Chen,L.-J.; Lin,X.-D.; Guo,W.-P.; Tian,J.-H.; Zhang,Y.-Z.
EPI683021	NA	China	2015-Jan-01	EPI_ISL_205121	A/duck/Taizhou/TZYG12/2015		Import from public-domain	Chen,L.-J.; Lin,X.-D.; Guo,W.-P.; Tian,J.-H.; Zhang,Y.-Z.
EPI683013	NA	China	2015-Jan-01	EPI_ISL_205139	A/turtledove/Wuhan/HKBJ27/2015		Import from public-domain	Chen,L.-J.; Lin,X.-D.; Guo,W.-P.; Tian,J.-H.; Zhang,Y.-Z.
EPI683014	NA	China	2015-Jan-01	EPI_ISL_205140	A/turtledove/Wuhan/HKBJ43/2015		Import from public-domain	Chen,L.-J.; Lin,X.-D.; Guo,W.-P.; Tian,J.-H.; Zhang,Y.-Z.
EPI683010	NA	China	2015-Jan-01	EPI_ISL_205142	A/turtledove/Wuhan/HKBJ07/2015		Import from public-domain	Chen,L.-J.; Lin,X.-D.; Guo,W.-P.; Tian,J.-H.; Zhang,Y.-Z.
EPI683008	NA	China	2015-Jan-01	EPI_ISL_205143	A/turtledove/Wuhan/HKBJ62/2015		Import from public-domain	Chen,L.-J.; Lin,X.-D.; Guo,W.-P.; Tian,J.-H.; Zhang,Y.-Z.
EPI687145	NA	Hong Kong (SAR)	2015-Apr-10	EPI_ISL_205821	A/peregrine_falcon/Hong_Kong/04955/2015	Agriculture, Fisheries and Conservation Department	Agriculture, Fisheries and Conservation Department	LUK, Geraldine SM; LEE, Frances E; IP, Sin-Ming; WAI, Chris KL
EPI687153	NA	Hong Kong (SAR)	2015-Apr-30	EPI_ISL_205823	A/Oriental_magpie_robin/Hong_Kong/06154/2015	Agriculture, Fisheries and Conservation Department	Agriculture, Fisheries and Conservation Department	LUK, Geraldine SM; LEE, Frances E; IP, Sin-Ming; WAI, Chris KL
EPI687155	NA	Hong Kong (SAR)	2015-Nov-18	EPI_ISL_205824	A/Oriental_magpie_robin/Hong_Kong/16759/2015	Agriculture, Fisheries and Conservation Department	Agriculture, Fisheries and Conservation Department	LUK, Geraldine SM; LEE, Frances E; IP, Sin-Ming; WAI, Chris KL
EPI687157	NA	Hong Kong (SAR)	2016-Jan-02	EPI_ISL_205825	A/great_egret/Hong_Kong/00032/2016	Agriculture, Fisheries and Conservation Department	Agriculture, Fisheries and Conservation Department	LUK, Geraldine SM; LEE, Frances E; IP, Sin-Ming; WAI, Chris KL
EPI687525	NA	China	2015-Aug-06	EPI_ISL_205964	A/Chicken/Guangdong/FG594/2015（H5N6）	South China Agricultural University	South China Agricultural University	Wenbao,Qi;Qian,Li;Lihong,Huang;Bo,Li;Weixin,Jia;Chenggang,Xu;Ming,Liao
EPI687541	NA	China	2015-Jan-03	EPI_ISL_205966	A/Goose/ Guangdong /SSLBY/2015（H5N6）	South China Agricultural University	South China Agricultural University	Wenbao,Qi;Qian,Li;Lihong,Huang;Bo,Li;Weixin,Jia;Chenggang,Xu;Ming,Liao
EPI704269	NA	Mongolia	2015-Aug-30	EPI_ISL_209112	A/duck/Mongolia/101/2015		Import from public-domain	Okamatsu,M.; Hatamachi,J.; Kida,H.; Sakoda,Y.
EPI704285	NA	Mongolia	2015-Aug-30	EPI_ISL_209114	A/duck/Mongolia/118/2015		Import from public-domain	Okamatsu,M.; Hatamachi,J.; Kida,H.; Sakoda,Y.
EPI704293	NA	Mongolia	2015-Aug-30	EPI_ISL_209115	A/duck/Mongolia/127/2015		Import from public-domain	Okamatsu,M.; Hatamachi,J.; Kida,H.; Sakoda,Y.
EPI704382	NA	Mongolia	2015-Aug-31	EPI_ISL_209127	A/duck/Mongolia/405/2015		Import from public-domain	Okamatsu,M.; Hatamachi,J.; Kida,H.; Sakoda,Y.
EPI704416	NA	Mongolia	2015-Aug-31	EPI_ISL_209131	A/duck/Mongolia/543/2015		Import from public-domain	Okamatsu,M.; Hatamachi,J.; Kida,H.; Sakoda,Y.
EPI704432	NA	Mongolia	2015-Aug-31	EPI_ISL_209133	A/duck/Mongolia/769/2015		Import from public-domain	Okamatsu,M.; Hatamachi,J.; Kida,H.; Sakoda,Y.
EPI742544	NA	China	2015-Jun-25	EPI_ISL_218200	A/Bar-headed_goose/Qinghai/X402/2015_H5N6	State Key Laboratory of Virology and Wuhan Institute of Virology, Chinese Academy of Sciences	Wuhan Institute of Virology
EPI742552	NA	China	2015-Jun-25	EPI_ISL_218201	A/Bar-headed_goose/Qinghai/X417/2015_H5N6	State Key Laboratory of Virology and Wuhan Institute of Virology, Chinese Academy of Sciences	Wuhan Institute of Virology
EPI742560	NA	China	2015-Jun-25	EPI_ISL_218202	A/Bar-headed_goose/Qinghai/X418-1/2015_H5N6	State Key Laboratory of Virology and Wuhan Institute of Virology, Chinese Academy of Sciences	Wuhan Institute of Virology
EPI742568	NA	China	2015-Jun-25	EPI_ISL_218203	A/Bar-headed_goose/Qinghai/X418-2/2015_H5N6	State Key Laboratory of Virology and Wuhan Institute of Virology, Chinese Academy of Sciences	Wuhan Institute of Virology
EPI742576	NA	China	2015-Jun-25	EPI_ISL_218204	A/Bar-headed_goose/Qinghai/X424/2015_H5N6	State Key Laboratory of Virology and Wuhan Institute of Virology, Chinese Academy of Sciences	Wuhan Institute of Virology
EPI742584	NA	China	2015-Jun-25	EPI_ISL_218205	A/Bar-headed_goose/Qinghai/X428/2015_H5N6	State Key Laboratory of Virology and Wuhan Institute of Virology, Chinese Academy of Sciences	Wuhan Institute of Virology
EPI742592	NA	China	2015-Jun-25	EPI_ISL_218206	A/Bar-headed_goose/Qinghai/X430/2015_H5N6	State Key Laboratory of Virology and Wuhan Institute of Virology, Chinese Academy of Sciences	Wuhan Institute of Virology
EPI742600	NA	China	2015-Jun-25	EPI_ISL_218207	A/Bar-headed_goose/Qinghai/X437/2015_H5N6	State Key Laboratory of Virology and Wuhan Institute of Virology, Chinese Academy of Sciences	Wuhan Institute of Virology
EPI759967	NA	China	2016-Jan-01	EPI_ISL_221705	A/duck/Guangdong/01.01 SZSGXJK001-Y /2016	Institute of Microbiology, Chinese Academy of Sciences	Institute of Microbiology, Chinese Academy of Sciences
EPI759975	NA	China	2016-Jan-01	EPI_ISL_221706	A/duck/Guangdong/01.01 SZSGXJK001-G/2016	Institute of Microbiology, Chinese Academy of Sciences	Institute of Microbiology, Chinese Academy of Sciences
EPI759983	NA	China	2016-Jan-01	EPI_ISL_221707	A/duck/Guangdong/01.01 SZSGXJK002-Y/2016	Institute of Microbiology, Chinese Academy of Sciences	Institute of Microbiology, Chinese Academy of Sciences
EPI759992	NA	China	2016-Jan-01	EPI_ISL_221708	A/duck/Guangdong/01.01 SZSGXJK002-G/2016	Institute of Microbiology, Chinese Academy of Sciences	Institute of Microbiology, Chinese Academy of Sciences
EPI760004	NA	China	2016-Jan-01	EPI_ISL_221709	A/duck/Guangdong/01.01 SZSGXJK003-G/2016	Institute of Microbiology, Chinese Academy of Sciences	Institute of Microbiology, Chinese Academy of Sciences
EPI760008	NA	China	2016-Jan-01	EPI_ISL_221710	A/duck/Guangdong/01.01 SZSGXJK004-Y/2016	Institute of Microbiology, Chinese Academy of Sciences	Institute of Microbiology, Chinese Academy of Sciences
EPI760028	NA	China	2016-Jan-01	EPI_ISL_221712	A/duck/Guangdong/01.01 SZSGXJK005-Y/2016	Institute of Microbiology, Chinese Academy of Sciences	Institute of Microbiology, Chinese Academy of Sciences
EPI760036	NA	China	2016-Jan-01	EPI_ISL_221713	A/duck/Guangdong/01.01 SZSGXJK005-G /2016	Institute of Microbiology, Chinese Academy of Sciences	Institute of Microbiology, Chinese Academy of Sciences
EPI760044	NA	China	2016-Jan-01	EPI_ISL_221714	A/duck/Guangdong/01.01 SZSGXJK006-Y/2016	Institute of Microbiology, Chinese Academy of Sciences	Institute of Microbiology, Chinese Academy of Sciences
EPI760052	NA	China	2016-Jan-01	EPI_ISL_221715	A/duck/Guangdong/01.01 SZSGXJK006-G/2016	Institute of Microbiology, Chinese Academy of Sciences	Institute of Microbiology, Chinese Academy of Sciences
EPI760056	NA	China	2016-Jan-01	EPI_ISL_221716	A/duck/Guangdong/01.01 SZSGXJK007-G/2016	Institute of Microbiology, Chinese Academy of Sciences	Institute of Microbiology, Chinese Academy of Sciences
EPI760215	NA	China	2015-Apr-06	EPI_ISL_221746	A/duck/Hunan/161/2015		Import from public-domain	Li,X.; Yang,J.; Liu,B.; Jia,Y.; Guo,J.; Gao,X.; Weng,S.; Yang,M.; Wang,L.; Wang,L.F.; Cui,J.; Chen,H.; Zhu,Q.
EPI760223	NA	China	2015-Apr-06	EPI_ISL_221747	A/duck/Hunan/7/2015		Import from public-domain	Li,X.; Yang,J.; Liu,B.; Jia,Y.; Guo,J.; Gao,X.; Weng,S.; Yang,M.; Wang,L.; Wang,L.F.; Cui,J.; Chen,H.; Zhu,Q.
EPI760824	NA	China	2015-Oct-16	EPI_ISL_221885	A/chicken/Guangdong/10.16 SZLGKQHY-072/2015		Institute of Microbiology, Chinese Academy of Sciences
EPI813326	NA	Vietnam	2015-Nov-10	EPI_ISL_230158	A/muscovy duck/LBM803/2015		Import from public-domain	Soda,K.; Nguyen,K.H.; Le,Q.M.; Ito,T.; Maegaki,S.
EPI817158	NA	Vietnam	2015-Nov-10	EPI_ISL_230754	A/muscovy duck/LBM806/2015		Import from public-domain	Soda,K.; Nguyen,K.H.; Le,Q.M.; Ito,T.; Maegaki,S.
EPI817160	NA	Vietnam	2015-Nov-10	EPI_ISL_230755	A/duck/Vietnam/LBM809/2015		Import from public-domain	Soda,K.; Nguyen,K.H.; Le,Q.M.; Ito,T.; Maegaki,S.
EPI817162	NA	Vietnam	2015-Nov-10	EPI_ISL_230756	A/muscovy duck/Vietnam/LBM810/2015		Import from public-domain	Soda,K.; Nguyen,K.H.; Le,Q.M.; Ito,T.; Maegaki,S.
EPI817164	NA	Vietnam	2015-Nov-10	EPI_ISL_230757	A/muscovy duck/Vietnam/LBM817/2015		Import from public-domain	Soda,K.; Nguyen,K.H.; Le,Q.M.; Ito,T.; Maegaki,S.
EPI817166	NA	Vietnam	2015-Nov-10	EPI_ISL_230758	A/muscovy duck/Vietnam/LBM818/2015		Import from public-domain	Soda,K.; Nguyen,K.H.; Le,Q.M.; Ito,T.; Maegaki,S.
EPI817168	NA	Vietnam	2015-Jan-01	EPI_ISL_230759	A/muscovy duck/Vietnam/LBM823/2015		Import from public-domain	Soda,K.; Nguyen,K.H.; Le,Q.M.; Ito,T.; Maegaki,S.
EPI817170	NA	Vietnam	2015-Nov-10	EPI_ISL_230760	A/duck/Vietnam/LBM812/2015		Import from public-domain	Soda,K.; Nguyen,K.H.; Le,Q.M.; Ito,T.; Maegaki,S.
EPI837310	NA	China	2015-Aug-18	EPI_ISL_234282	A/chicken/Hubei/XG18/2015		Import from public-domain	Zou,Z.
EPI837311	NA	China	2015-Aug-18	EPI_ISL_234283	A/duck/Hubei/XG18/2015		Import from public-domain	Zou,Z.
EPI837309	NA	China	2015-Oct-02	EPI_ISL_234284	A/duck/Hubei/WH18/2015		Import from public-domain	Zou,Z.
EPI839172	NA	China	2015-Feb-20	EPI_ISL_234679	A/Syrrhaptes paradoxus/Guangdong/ZH283/2015		Import from public-domain	Kang,Y.; Feng,M.; Ren,T.
EPI860420	NA	Japan	2015-Jul-30	EPI_ISL_237947	A/duck/Japan/AnimalQuarantine-HE72/2015	National Institute of Animal Health	National Institute of Animal Health	Uchida,Y.
EPI860460	NA	Japan	2015-Dec-03	EPI_ISL_237952	A/chicken/Japan/AnimalQuarantine-HE144/2016	National Institute of Animal Health	National Institute of Animal Health	Uchida,Y.
EPI861486	NA	Korea, Republic of	2016-Oct-28	EPI_ISL_238148	A/Mandarin_duck/Korea/K16-187-3/2016	Avian diaseases laboratory, College of Veterinary Medicine, Konkuk University	Konkuk University	Jung-Hoon, Kwon; Jin-Yong, Noh; Seong-Su, Yuk; Tseren-Ochir, Erdene-Ochir; Woo-Tack, Hong; Jei-Hyun, Jeong; Sol, Jeong; Gyeong-Bin, Gwon; Jiho, Lee; Yujin, Kim; Kyujik, Kim; Junbeom, Kim; Chang-Seon, Song
EPI880948	NA	Japan	2016-Dec-27	EPI_ISL_241745	A/chicken/Kumamoto/1-7T/2016		National Institute of Animal Health	Saito, T; Takemae, N
EPI880956	NA	Japan	2016-Dec-22	EPI_ISL_241746	A/black headed gull/Ibaraki/282T/2016		National Institute of Animal Health	Saito, T; Takemae, N
EPI880964	NA	Japan	2016-Dec-20	EPI_ISL_241747	A/black-headed-gull/Ibaraki/267T/2016		National Institute of Animal Health	Saito, T; Takemae, N
EPI880972	NA	Japan	2016-Dec-27	EPI_ISL_241748	A/chicken/Kumamoto/1-1T/2016		National Institute of Animal Health	Saito, T; Takemae, N
EPI880980	NA	Japan	2016-Dec-20	EPI_ISL_241749	A/mute swan/Ibaraki/263T/2016		National Institute of Animal Health	Saito, T; Takemae, N
EPI880988	NA	Japan	2016-Dec-20	EPI_ISL_241750	A/mute swan/Ibaraki/262C/2016		National Institute of Animal Health	Saito, T; Takemae, N
EPI880996	NA	Japan	2016-Dec-27	EPI_ISL_241751	A/chicken/Kumamoto/1-4C/2016		National Institute of Animal Health	Saito, T; Takemae, N
EPI881004	NA	Japan	2016-Dec-28	EPI_ISL_241752	A/whooper swan/Ibaraki/301T/2016		National Institute of Animal Health	Saito, T; Takemae, N
EPI881012	NA	Japan	2016-Dec-26	EPI_ISL_241753	A/black swan/Ibaraki/290C/2016		National Institute of Animal Health	Saito, T; Takemae, N
EPI881020	NA	Japan	2016-Dec-25	EPI_ISL_241754	A/great crested grebe/Ibaraki/286T/2016		National Institute of Animal Health	Saito, T; Takemae, N
EPI881028	NA	Japan	2016-Dec-25	EPI_ISL_241755	A/great crested grebe/Ibaraki/287T/2016		National Institute of Animal Health	Saito, T; Takemae, N
EPI881036	NA	Japan	2016-Dec-18	EPI_ISL_241756	A/mute swan/Ibaraki/252T/2016		National Institute of Animal Health	Saito, T; Takemae, N
EPI881044	NA	Japan	2016-Dec-19	EPI_ISL_241757	A/black swan/Ibaraki/256C/2016		National Institute of Animal Health	Saito, T; Takemae, N
EPI881052	NA	Japan	2016-Dec-19	EPI_ISL_241758	A/chicken/Miyazaki/1-5C/2016		National Institute of Animal Health	Saito, T; Takemae, N
EPI881060	NA	Japan	2016-Dec-26	EPI_ISL_241759	A/black headed gull/Ibaraki/291T/2016		National Institute of Animal Health	Saito, T; Takemae, N
EPI881068	NA	Japan	2016-Dec-27	EPI_ISL_241760	A/chicken/Kumamoto/1-2C/2016		National Institute of Animal Health	Saito, T; Takemae, N
EPI881076	NA	Japan	2016-Dec-27	EPI_ISL_241761	A/chicken/Kumamoto/1-3T/2016		National Institute of Animal Health	Saito, T; Takemae, N
EPI881084	NA	Japan	2016-Dec-30	EPI_ISL_241762	A/black swan/Ibaraki/302C/2016		National Institute of Animal Health	Saito, T; Takemae, N
EPI881092	NA	Japan	2016-Dec-27	EPI_ISL_241763	A/chicken/Kumamoto/1-6T/2016		National Institute of Animal Health	Saito, T; Takemae, N
EPI881100	NA	Japan	2016-Dec-27	EPI_ISL_241764	A/chicken/Kumamoto/1-7C/2016		National Institute of Animal Health	Saito, T; Takemae, N
EPI881108	NA	Japan	2016-Dec-27	EPI_ISL_241765	A/chicken/Kumamoto/1-4T/2016		National Institute of Animal Health	Saito, T; Takemae, N
EPI881116	NA	Japan	2016-Dec-27	EPI_ISL_241766	A/chicken/Kumamoto/1-5C/2016		National Institute of Animal Health	Saito, T; Takemae, N
EPI881124	NA	Japan	2016-Dec-24	EPI_ISL_241767	A/black headed gull/Ibaraki/284T/2016		National Institute of Animal Health	Saito, T; Takemae, N
EPI881132	NA	Japan	2016-Dec-21	EPI_ISL_241768	A/mute swan/Ibaraki/270T/2016		National Institute of Animal Health	Saito, T; Takemae, N
EPI881140	NA	Japan	2016-Dec-17	EPI_ISL_241769	A/mute swan/Ibaraki/248C/2016		National Institute of Animal Health	Saito, T; Takemae, N
EPI881148	NA	Japan	2016-Dec-27	EPI_ISL_241770	A/chicken/Kumamoto/1-3C/2016		National Institute of Animal Health	Saito, T; Takemae, N
EPI881156	NA	Japan	2016-Dec-21	EPI_ISL_241771	A/black swan/Ibaraki/271C/2016		National Institute of Animal Health	Saito, T; Takemae, N
EPI881164	NA	Japan	2017-Jan-04	EPI_ISL_241772	A/black swan/Ibaraki/310C/2017		National Institute of Animal Health	Saito, T; Takemae, N
EPI881172	NA	Japan	2016-Dec-21	EPI_ISL_241773	A/pochard/Ibaraki/268T/2016		National Institute of Animal Health	Saito, T; Takemae, N
EPI881180	NA	Japan	2016-Dec-27	EPI_ISL_241774	A/chicken/Kumamoto/1-1C/2016		National Institute of Animal Health	Saito, T; Takemae, N
EPI881188	NA	Japan	2016-Dec-27	EPI_ISL_241775	A/chicken/Kumamoto/1-2T/2016		National Institute of Animal Health	Saito, T; Takemae, N
EPI881196	NA	Japan	2016-Dec-26	EPI_ISL_241776	A/black headed gull/Ibaraki/289T/2016		National Institute of Animal Health	Saito, T; Takemae, N
EPI881204	NA	Japan	2016-Dec-28	EPI_ISL_241777	A/great crested grebe/Ibaraki/298C/2016		National Institute of Animal Health	Saito, T; Takemae, N
EPI881212	NA	Japan	2016-Dec-22	EPI_ISL_241778	A/muteswan/Ibaraki/277T/2016		National Institute of Animal Health	Saito, T; Takemae, N
EPI881220	NA	Japan	2016-Dec-27	EPI_ISL_241779	A/chicken/Kumamoto/1-5T/2016		National Institute of Animal Health	Saito, T.; Takemae, N.
EPI885283	NA	Japan	2017-Jan-14	EPI_ISL_242401	A/chicken/Gifu/1-1T/2017		National Institute of Animal Health	Saito, T; Uchida, Y
EPI885291	NA	Japan	2016-Dec-14	EPI_ISL_242402	A/duck/Fukuoka/401202/2016		National Institute of Animal Health	Mase, M; Saito, T; Uchida, Y
EPI885299	NA	Japan	2017-Jan-14	EPI_ISL_242403	A/chicken/Gifu/1-1C/2017		National Institute of Animal Health	Saito, T; Uchida, Y
EPI885307	NA	Japan	2017-Jan-14	EPI_ISL_242404	A/chicken/Gifu/1-10C/2017		National Institute of Animal Health	Saito, T; Uchida, Y
EPI885315	NA	Japan	2017-Jan-11	EPI_ISL_242405	A/whooper swan/Ibaraki/331C/2017		National Institute of Animal Health	Saito, T; Uchida, Y
EPI885323	NA	Japan	2017-Jan-16	EPI_ISL_242406	A/black swan/Ibaraki/341C/2017		National Institute of Animal Health	Saito, T; Uchida, Y
EPI885331	NA	Japan	2017-Jan-14	EPI_ISL_242407	A/chicken/Gifu/1-2T/2017		National Institute of Animal Health	Saito, T; Uchida, Y
EPI885339	NA	Japan	2017-Jan-14	EPI_ISL_242408	A/chicken/Gifu/1-10T/2017		National Institute of Animal Health	Saito, T; Uchida, Y
EPI885347	NA	Japan	2017-Jan-14	EPI_ISL_242409	A/chicken/Gifu/1-6C/2017		National Institute of Animal Health	Saito, T; Uchida, Y
EPI885355	NA	Japan	2016-Dec-16	EPI_ISL_242410	A/duck/Yamaguchi/351201/2016		National Institute of Animal Health	Mase, M; Saito, T; Uchida, Y
EPI885363	NA	Japan	2017-Jan-14	EPI_ISL_242411	A/chicken/Gifu/1-6T/2017		National Institute of Animal Health	Saito, T; Uchida, Y
EPI885371	NA	Japan	2017-Jan-14	EPI_ISL_242412	A/chicken/Gifu/1-9C/2017		National Institute of Animal Health	Saito, T; Uchida, Y
EPI885379	NA	Japan	2017-Jan-14	EPI_ISL_242413	A/chicken/Gifu/1-8C/2017		National Institute of Animal Health	Saito, T; Uchida, Y
EPI885387	NA	Japan	2017-Jan-14	EPI_ISL_242414	A/chicken/Gifu/1-2C/2017		National Institute of Animal Health	Saito, T; Uchida, Y
EPI885395	NA	Japan	2017-Jan-16	EPI_ISL_242415	A/black swan/Ibaraki/341T/2017		National Institute of Animal Health	Saito, T; Uchida, Y
EPI886592	NA	Japan	2016-Dec-27	EPI_ISL_242666	A/chicken/Kumamoto/1-6C/2016		National Institute of Animal Health	Saito, T.; Takemae, N.
EPI888443	NA	Japan	2016-Nov-06	EPI_ISL_242903	A/Northern Pintail/Tottori/b37/2016		Import from public-domain	Takakuwa,H.
EPI888452	NA	Japan	2016-Nov-19	EPI_ISL_243058	A/black swan/Akita/1/2016		Import from public-domain	Okamatsu,M.; Hiono,T.; Matsuno,K.; Kida,H.; Sakoda,Y.
EPI888460	NA	Japan	2016-Nov-19	EPI_ISL_243059	A/black swan/Akita/2/2016		Import from public-domain	Okamatsu,M.; Hiono,T.; Matsuno,K.; Kida,H.; Sakoda,Y.
EPI888468	NA	Japan	2016-Nov-15	EPI_ISL_243060	A/teal/Tottori/1/2016		Import from public-domain	Soda,K.; Usui,T.; Ito,H.; Ozaki,H.; Murase,T.; Yamaguchi,T.; Ito,T.
EPI888476	NA	Japan	2016-Nov-15	EPI_ISL_243061	A/teal/Tottori/2/2016		Import from public-domain	Soda,K.; Ito,H.; Usui,T.; Ozaki,H.; Murase,T.; Yamaguchi,T.; Ito,T.
EPI907033	NA	Japan	2016-Dec-14	EPI_ISL_247371	A/mute swan/Ibaraki/219T/2016	National Institute of Animal Health	National Institute of Animal Health	Takehiko, S
EPI907041	NA	Japan	2016-Dec-14	EPI_ISL_247372	A/mute swan/Ibaraki/220C/2016	National Institute of Animal Health	National Institute of Animal Health	Takehiko, S
EPI907049	NA	Japan	2016-Dec-14	EPI_ISL_247373	A/black headed gull/Ibaraki/194C/2016	National Institute of Animal Health	National Institute of Animal Health	Takehiko, S
EPI907057	NA	Japan	2016-Dec-13	EPI_ISL_247374	A/mute swan/Ibaraki/214C/2016	National Institute of Animal Health	National Institute of Animal Health	Takehiko, S
EPI907065	NA	Japan	2016-Dec-14	EPI_ISL_247375	A/mute swan/Ibaraki/222C/2016	National Institute of Animal Health	National Institute of Animal Health	Takehiko, S
EPI907073	NA	Japan	2016-Dec-10	EPI_ISL_247376	A/mute swan/Ibaraki/208T/2016	National Institute of Animal Health	National Institute of Animal Health	Takehiko, S
EPI907081	NA	Japan	2016-Dec-14	EPI_ISL_247377	A/mute swan/Ibaraki/223C/2016	National Institute of Animal Health	National Institute of Animal Health	Takehiko, S
EPI907089	NA	Japan	2017-Feb-04	EPI_ISL_247378	A/chicken/Saga/1-1T/2017	National Institute of Animal Health	National Institute of Animal Health	Takehiko, S
EPI907097	NA	Japan	2017-Feb-04	EPI_ISL_247379	A/chicken/Saga/1-5T/2017	National Institute of Animal Health	National Institute of Animal Health	Takehiko, S
EPI907105	NA	Japan	2017-Feb-04	EPI_ISL_247380	A/chicken/Saga/1-4C/2017	National Institute of Animal Health	National Institute of Animal Health	Takehiko, S
EPI907113	NA	Japan	2016-Dec-13	EPI_ISL_247381	A/mute swan/Ibaraki/217C/2016	National Institute of Animal Health	National Institute of Animal Health	Takehiko, S
EPI907121	NA	Japan	2017-Feb-04	EPI_ISL_247382	A/chicken/Saga/1-1C/2017	National Institute of Animal Health	National Institute of Animal Health	Takehiko, S
EPI907129	NA	Japan	2016-Dec-08	EPI_ISL_247383	A/mute swan/Ibaraki/202C/2016	National Institute of Animal Health	National Institute of Animal Health	Takehiko, S
EPI907137	NA	Japan	2017-Feb-04	EPI_ISL_247384	A/chicken/Saga/1-3C/2017	National Institute of Animal Health	National Institute of Animal Health	Takehiko, S
EPI907145	NA	Japan	2017-Feb-04	EPI_ISL_247385	A/chicken/Saga/1-2C/2017	National Institute of Animal Health	National Institute of Animal Health	Takehiko, S
EPI907153	NA	Japan	2016-Dec-13	EPI_ISL_247386	A/mute swan/Ibaraki/214T/2016	National Institute of Animal Health	National Institute of Animal Health	Takehiko, S
EPI907161	NA	Japan	2016-Dec-08	EPI_ISL_247387	A/mute swan/Ibaraki/202T/2016	National Institute of Animal Health	National Institute of Animal Health	Takehiko, S
EPI907169	NA	Japan	2016-Dec-14	EPI_ISL_247388	A/mute swan/Ibaraki/222T/2016	National Institute of Animal Health	National Institute of Animal Health	Takehiko, S
EPI907177	NA	Japan	2016-Dec-14	EPI_ISL_247389	A/mute swan/Ibaraki/223T/2016	National Institute of Animal Health	National Institute of Animal Health	Takehiko, S
EPI907185	NA	Japan	2016-Dec-14	EPI_ISL_247390	A/mute swan/Ibaraki/218T/2016	National Institute of Animal Health	National Institute of Animal Health	Takehiko, S
EPI907193	NA	Japan	2016-Dec-13	EPI_ISL_247391	A/mute swan/Ibaraki/217T/2016	National Institute of Animal Health	National Institute of Animal Health	Takehiko, S
EPI907201	NA	Japan	2017-Feb-04	EPI_ISL_247392	A/chicken/Saga/1-6T/2017	National Institute of Animal Health	National Institute of Animal Health	Takehiko, S
EPI907209	NA	Japan	2017-Feb-04	EPI_ISL_247393	A/chicken/Saga/1-5C/2017	National Institute of Animal Health	National Institute of Animal Health	Takehiko, S
EPI907217	NA	Japan	2016-Nov-29	EPI_ISL_247394	A/whooper swan/Ibaraki/188C/2016	National Institute of Animal Health	National Institute of Animal Health	Takehiko, S
EPI907225	NA	Japan	2017-Feb-04	EPI_ISL_247395	A/chicken/Saga/1-6C/2017	National Institute of Animal Health	National Institute of Animal Health	Takehiko, S
EPI907233	NA	Japan	2017-Feb-04	EPI_ISL_247396	A/chicken/Saga/1-2T/2017	National Institute of Animal Health	National Institute of Animal Health	Takehiko, S
EPI907241	NA	Japan	2017-Feb-04	EPI_ISL_247397	A/chicken/Saga/1-3T/2017	National Institute of Animal Health	National Institute of Animal Health	Takehiko, S
EPI907249	NA	Japan	2017-Feb-04	EPI_ISL_247398	A/chicken/Saga/1-4T/2017	National Institute of Animal Health	National Institute of Animal Health	Takehiko, S
EPI907257	NA	Japan	2017-Feb-04	EPI_ISL_247399	A/chicken/Saga/1-7C/2017	National Institute of Animal Health	National Institute of Animal Health	Takehiko, S
EPI907265	NA	Japan	2016-Dec-10	EPI_ISL_247400	A/mute swan/Ibaraki/210T/2016	National Institute of Animal Health	National Institute of Animal Health	Takehiko, S
EPI907273	NA	Japan	2016-Dec-14	EPI_ISL_247401	A/mute swan/Ibaraki/221C/2016	National Institute of Animal Health	National Institute of Animal Health	Takehiko, S
EPI907281	NA	Japan	2016-Dec-14	EPI_ISL_247402	A/mute swan/Ibaraki/219C/2016	National Institute of Animal Health	National Institute of Animal Health	Takehiko, S
EPI907289	NA	Japan	2017-Feb-04	EPI_ISL_247403	A/chicken/Saga/1-7T/2017	National Institute of Animal Health	National Institute of Animal Health	Takehiko, S
EPI907313	NA	Japan	2016-Dec-06	EPI_ISL_247406	A/black headed gull/Ibaraki/194T/2016	National Institute of Animal Health	National Institute of Animal Health	Takehiko, S
EPI907321	NA	Japan	2016-Dec-14	EPI_ISL_247407	A/mute swan/Ibaraki/218C/2016	National Institute of Animal Health	National Institute of Animal Health	Takehiko, S
EPI956147	NA	China	2015-Dec-19	EPI_ISL_255389	A/chicken/Anhui/AH325/2015		Wuhan Institute of Virology
EPI959116	NA	China	2015-Dec-19	EPI_ISL_255412	A/chicken/Hunan/HN158/2015		Wuhan Institute of Virology
EPI956204	NA	China	2015-Sep-13	EPI_ISL_255413	A/chicken/Hunan/HN244/2015		Wuhan Institute of Virology
EPI956212	NA	China	2015-Sep-13	EPI_ISL_255414	A/chicken/Hunan/HN245/2015		Wuhan Institute of Virology
EPI956220	NA	China	2015-Sep-13	EPI_ISL_255415	A/chicken/Hunan/HN247/2015		Wuhan Institute of Virology
EPI956240	NA	China	2015-Sep-13	EPI_ISL_255416	A/chicken/Hunan/HN248/2015		Wuhan Institute of Virology
EPI956248	NA	China	2015-Sep-13	EPI_ISL_255417	A/chicken/Hunan/HN249/2015		Wuhan Institute of Virology
EPI956256	NA	China	2015-Sep-13	EPI_ISL_255418	A/chicken/Hunan/HN250/2015		Wuhan Institute of Virology
EPI956264	NA	China	2015-Sep-13	EPI_ISL_255419	A/chicken/Hunan/HN251/2015		Wuhan Institute of Virology
EPI956272	NA	China	2015-Sep-13	EPI_ISL_255420	A/chicken/Hunan/HN252/2015		Wuhan Institute of Virology
EPI956292	NA	China	2015-Sep-13	EPI_ISL_255421	A/chicken/Hunan/HN254/2015		Wuhan Institute of Virology
EPI956300	NA	China	2015-Dec-16	EPI_ISL_255422	A/chicken/Hunan/HN263/2015		Wuhan Institute of Virology
EPI956308	NA	China	2015-Sep-13	EPI_ISL_255423	A/chicken/Hunan/HN255/2015		Wuhan Institute of Virology
EPI956316	NA	China	2015-Dec-17	EPI_ISL_255424	A/chicken/Hunan/HN264/2015		Wuhan Institute of Virology
EPI956324	NA	China	2015-Dec-17	EPI_ISL_255425	A/chicken/Hunan/HN265/2015		Wuhan Institute of Virology
EPI956332	NA	China	2015-Dec-17	EPI_ISL_255426	A/chicken/Hunan/HN266/2015		Wuhan Institute of Virology
EPI956340	NA	China	2015-Dec-17	EPI_ISL_255427	A/chicken/Hunan/HN301/2015		Wuhan Institute of Virology
EPI956348	NA	China	2015-Dec-17	EPI_ISL_255428	A/chicken/Hunan/HN302/2015		Wuhan Institute of Virology
EPI956356	NA	China	2015-Dec-17	EPI_ISL_255429	A/chicken/Hunan/HN303/2015		Wuhan Institute of Virology
EPI956364	NA	China	2015-Dec-17	EPI_ISL_255430	A/chicken/Hunan/HN304/2015		Wuhan Institute of Virology
EPI956430	NA	China	2015-Dec-17	EPI_ISL_255433	A/chicken/Hunan/HN305/2015		Wuhan Institute of Virology
EPI956474	NA	China	2015-Dec-17	EPI_ISL_255466	A/chicken/Hunan/HN306/2015		Wuhan Institute of Virology
EPI956482	NA	China	2015-Dec-17	EPI_ISL_255467	A/chicken/Hunan/HN307/2015		Wuhan Institute of Virology
EPI956490	NA	China	2015-Dec-17	EPI_ISL_255468	A/chicken/Hunan/HN308/2015		Wuhan Institute of Virology
EPI956498	NA	China	2015-Apr-06	EPI_ISL_255469	A/chicken/Hunan/HN40/2015		Wuhan Institute of Virology
EPI956650	NA	China	2015-Apr-06	EPI_ISL_255470	A/chicken/Hunan/HN58/2015		Wuhan Institute of Virology
EPI956658	NA	China	2015-Sep-11	EPI_ISL_255489	A/chicken/Hunan/HN75/2015		Wuhan Institute of Virology
EPI956674	NA	China	2015-Dec-19	EPI_ISL_255491	A/duck/Anhui/AH328/2015		Wuhan Institute of Virology
EPI956984	NA	China	2015-Apr-06	EPI_ISL_255529	A/duck/Hunan/HN13/2015		Wuhan Institute of Virology
EPI956992	NA	China	2015-Apr-06	EPI_ISL_255530	A/duck/Hunan/HN16/2015		Wuhan Institute of Virology
EPI957108	NA	China	2015-Sep-11	EPI_ISL_255534	A/duck/Hunan/HN162/2015		Wuhan Institute of Virology
EPI957120	NA	China	2015-Sep-11	EPI_ISL_255559	A/duck/Hunan/HN163/2015		Wuhan Institute of Virology
EPI957128	NA	China	2015-Sep-11	EPI_ISL_255561	A/duck/Hunan/HN167/2015		Wuhan Institute of Virology
EPI957136	NA	China	2015-Sep-11	EPI_ISL_255562	A/duck/Hunan/HN171/2015		Wuhan Institute of Virology
EPI957144	NA	China	2015-Sep-11	EPI_ISL_255563	A/duck/Hunan/HN172/2015		Wuhan Institute of Virology
EPI957208	NA	China	2015-Sep-11	EPI_ISL_255564	A/duck/Hunan/HN174/2015		Wuhan Institute of Virology
EPI957368	NA	China	2015-Sep-11	EPI_ISL_255587	A/duck/Hunan/HN176/2015		Wuhan Institute of Virology
EPI957376	NA	China	2015-Sep-11	EPI_ISL_255592	A/duck/Hunan/HN177/2015		Wuhan Institute of Virology
EPI957408	NA	China	2015-Sep-12	EPI_ISL_255599	A/duck/Hunan/HN182/2015		Wuhan Institute of Virology
EPI974652	NA	Vietnam	2015-Sep-12	EPI_ISL_258753	A/quail/Quang Nam/AI440/2015	National Institute of Animal Health	National Institute of Animal Health	Uchida,Y.
EPI974660	NA	Vietnam	2015-Nov-16	EPI_ISL_258754	A/duck/Quang Ngai/AI437/2015	National Institute of Animal Health	National Institute of Animal Health	Uchida,Y.
EPI974668	NA	Vietnam	2015-Aug-21	EPI_ISL_258755	A/quail/Quang Ngai/AI/431/2015	National Institute of Animal Health	National Institute of Animal Health	Uchida,Y.
EPI974692	NA	Vietnam	2015-Aug-21	EPI_ISL_258758	A/duck/Quang Ngai/AI432/2015	National Institute of Animal Health	National Institute of Animal Health	Uchida,Y.
EPI974700	NA	Vietnam	2015-Nov-11	EPI_ISL_258759	A/duck/Quang Ngai/AI436/2015	National Institute of Animal Health	National Institute of Animal Health	Uchida,Y.
EPI974716	NA	Vietnam	2015-Sep-21	EPI_ISL_258761	A/duck/Quang Ngai/AI435/2015	National Institute of Animal Health	National Institute of Animal Health	Uchida,Y.
EPI974724	NA	Vietnam	2015-Sep-12	EPI_ISL_258762	A/quail/Quang Nam/AI439/2015	National Institute of Animal Health	National Institute of Animal Health	Uchida,Y.
EPI974740	NA	Vietnam	2015-Sep-12	EPI_ISL_258764	A/quail/Quang Nam/AI441/2015	National Institute of Animal Health	National Institute of Animal Health	Uchida,Y.
[truncated: 2,086 more rows]

## Sheet: Remaining segments
Supplemental Table 1: List of sequences obtained from the GISAID’s EpiFlu™ Database.
[truncated: 35,099 more rows]
