# Supplementary material for: Continued Circulation of Highly Pathogenic H5 Influenza Viruses in Vietnamese Live Bird Markets in 2018–2021
Source: Viruses. 2023 Jul 21;15(7):1596. doi: 10.3390/v15071596 (PMC10384249; doi:10.3390/v15071596)
Supplement: Supplementary file 1 [file viruses-15-01596-s001.zip › Guan - Supplemental Table 2_071823.xlsx]

## Sheet: A_PB2
Supplemental Table 2: Consensus sequences of viral proteins isolated in this study.
Virus	Subtype	Clade	Protein Length	1	2	3	4	5	6	7	8	9	10	11	12	13	14	15	16	17	18	19	20	21	22	23	24	25	26	27	28	29	30	31	32	33	34	35	36	37	38	39	40	41	42	43	44	45	46
A/muscovy-duck/Vietnam/HN4711/2018	H5N6	2.3.4.4h	759	M	N	R	I	K	E	L	R	D	L	M	S	Q	S	R	T	R	E	I	L	T	K	T	T	V	D	H	M	A	I	I	K	K	Y	T	S	G	R	Q	E	K	N	P	A	L	R
A/muscovy-duck/Vietnam/HN4713/2018	H5N6	2.3.4.4h	759	M	N	R	I	K	E	L	R	D	L	M	S	Q	S	R	T	R	E	I	L	T	K	T	T	V	D	H	M	A	I	I	K	K	Y	T	S	G	R	Q	E	K	N	P	A	L	R
A/muscovy-duck/Vietnam/HN4714/2018	H5N6	2.3.4.4h	759	M	N	R	I	K	E	L	R	D	L	M	S	Q	S	R	T	R	E	I	L	T	K	T	T	V	D	H	M	A	I	I	K	K	Y	T	S	G	R	Q	E	K	N	P	A	L	R
A/muscovy-duck/Vietnam/HN4715/2018	H5N6	2.3.4.4h	759	M	N	R	I	K	E	L	R	D	L	M	S	Q	S	R	T	R	E	I	L	T	K	T	T	V	D	H	M	A	I	I	K	K	Y	T	S	G	R	Q	E	K	N	P	A	L	R
A/muscovy-duck/Vietnam/HN4716/2018	H5N6	2.3.4.4h	759	M	N	R	I	K	E	L	R	D	L	M	S	Q	S	R	T	R	E	I	L	T	K	T	T	V	D	H	M	A	I	I	K	K	Y	T	S	G	R	Q	E	K	N	P	A	L	R
A/muscovy-duck/Vietnam/HN4718/2018	H5N6	2.3.4.4h	759	M	N	R	I	K	E	L	R	D	L	M	S	Q	S	R	T	R	E	I	L	T	K	T	T	V	D	H	M	A	I	I	K	K	Y	T	S	G	R	Q	E	K	N	P	A	L	R
A/muscovy-duck/Vietnam/HN4719/2018	H5N6	2.3.4.4h	759	M	N	R	I	K	E	L	R	D	L	M	S	Q	S	R	T	R	E	I	L	T	K	T	T	V	D	H	M	A	I	I	K	K	Y	T	S	G	R	Q	E	K	N	P	A	L	R
A/muscovy-duck/Vietnam/HN4720/2018	H5N6	2.3.4.4h	759	M	N	R	I	K	E	L	R	D	L	M	S	Q	S	R	T	R	E	I	L	T	K	T	T	V	D	H	M	A	I	I	K	K	Y	T	S	G	R	Q	E	K	N	P	A	L	R
A/duck/Vietnam/HN4721/2018	H5N6	2.3.4.4h	759	M	N	R	I	K	E	L	R	D	L	M	S	Q	S	R	T	R	E	I	L	T	K	T	T	V	D	H	M	A	I	I	K	K	Y	T	S	G	R	Q	E	K	N	P	A	L	R
A/muscovy-duck/Vietnam/HN4856/2018	H5N6	2.3.4.4h	759	M	N	R	I	K	E	L	R	D	L	M	S	Q	S	R	T	R	E	I	L	T	K	T	T	V	D	H	M	A	I	I	K	K	Y	T	S	G	R	Q	E	K	N	P	A	L	R
A/muscovy-duck/Vietnam/HN4857/2018	H5N6	2.3.4.4h	759	M	N	R	I	K	E	L	R	D	L	M	S	Q	S	R	T	R	E	I	L	T	K	T	T	V	D	H	M	A	I	I	K	K	Y	T	S	G	R	Q	E	K	N	P	A	L	R
A/muscovy-duck/Vietnam/HN4858/2018	H5N6	2.3.4.4h	759	M	N	R	I	K	E	L	R	D	L	M	S	Q	S	R	T	R	E	I	L	T	K	T	T	V	D	H	M	A	I	I	K	K	Y	T	S	G	R	Q	E	K	N	P	A	L	R
A/muscovy-duck/Vietnam/HN5046/2018	H5N6	2.3.4.4h	759	M	N	R	I	K	E	L	R	D	L	M	S	Q	S	R	T	R	E	I	L	T	K	T	T	V	D	H	M	A	I	I	K	K	Y	T	S	G	R	Q	E	K	N	P	A	L	R
A/muscovy-duck/Vietnam/HN5047/2018	H5N6	2.3.4.4h	759	M	N	R	I	K	E	L	R	D	L	M	S	Q	S	R	T	R	E	I	L	T	K	T	T	V	D	H	M	A	I	I	K	K	Y	T	S	G	R	Q	E	K	N	P	A	L	R
A/muscovy-duck/Vietnam/HN5048/2018	H5N6	2.3.4.4h	759	M	N	R	I	K	E	L	R	D	L	M	S	Q	S	R	T	R	E	I	L	T	K	T	T	V	D	H	M	A	I	I	K	K	Y	T	S	G	R	Q	E	K	N	P	A	L	R
A/duck/Vietnam/HN5080/2018	H5N6	2.3.4.4h	759	M	N	R	I	K	E	L	R	D	L	M	S	Q	S	R	T	R	E	I	L	T	K	T	T	V	D	H	M	A	I	I	K	K	Y	T	S	G	R	Q	E	K	N	P	A	L	R
A/muscovy-duck/Vietnam/HN5132/2018	H5N6	2.3.4.4h	759	M	N	R	I	K	E	L	R	D	L	M	S	Q	S	R	T	R	E	I	L	T	K	T	T	V	D	H	M	A	I	I	K	K	Y	T	S	G	R	Q	E	K	N	P	A	L	R
A/muscovy-duck/Vietnam/HN5135/2018	H5N6	2.3.4.4h	759	M	N	R	I	K	E	L	R	D	L	M	S	Q	S	R	T	R	E	I	L	T	K	T	T	V	D	H	M	A	I	I	K	K	Y	T	S	G	R	Q	E	K	N	P	A	L	R
A/muscovy-duck/Vietnam/HN5137/2018	H5N6	2.3.4.4h	759	M	N	R	I	K	E	L	R	D	L	M	S	Q	S	R	T	R	E	I	L	T	K	T	T	V	D	H	M	A	I	I	K	K	Y	T	S	G	R	Q	E	K	N	P	A	L	R
A/muscovy-duck/Vietnam/HN5138/2018	H5N6	2.3.4.4h	759	M	N	R	I	K	E	L	R	D	L	M	S	Q	S	R	T	R	E	I	L	T	K	T	T	V	D	H	M	A	I	I	K	K	Y	T	S	G	R	Q	E	K	N	P	A	L	R
A/muscovy-duck/Vietnam/HN5139/2018	H5N6	2.3.4.4h	759	M	N	R	I	K	E	L	R	D	L	M	S	Q	S	R	T	R	E	I	L	T	K	T	T	V	D	H	M	A	I	I	K	K	Y	T	S	G	R	Q	E	K	N	P	A	L	R
A/muscovy-duck/Vietnam/HN5140/2018	H5H9N2N6	2.3.4.4h	759	M	E	R	I	K	E	L	R	D	L	M	S	Q	S	R	T	R	E	I	L	T	K	T	T	V	D	H	M	A	I	I	K	K	Y	T	S	G	R	Q	E	K	N	P	A	L	R
A/muscovy-duck/Vietnam/HN5049/2018	H5N6	2.3.4.4h	759	M	N	R	I	K	E	L	R	D	L	M	S	Q	S	R	T	R	E	I	L	T	K	T	T	V	D	H	M	A	I	I	K	K	Y	T	S	G	R	Q	E	K	N	P	A	L	R
A/duck/Vietnam/HN5150/2018	H5H6N6	2.3.4.4h	759	M	E	R	I	K	E	L	R	D	L	M	S	Q	S	R	T	R	E	I	L	T	K	T	T	V	D	H	M	A	I	I	K	K	Y	T	S	G	R	Q	E	K	N	P	A	L	R
A/muscovy-duck/Vietnam/HN6029/2019	H5H6N6N8	2.3.4.4h	759	M	E	R	I	K	E	L	R	D	L	M	S	Q	S	R	T	R	E	I	L	T	K	T	T	V	D	H	M	A	I	I	K	K	Y	T	S	G	R	Q	E	K	N	P	A	L	R
A/muscovy-duck/Vietnam/HN6111/2020	H5N6	2.3.4.4h	759	M	N	R	I	K	E	L	R	D	L	M	S	Q	S	R	T	R	E	I	L	T	K	T	T	V	D	H	M	A	I	I	K	K	Y	T	S	G	R	Q	E	K	N	P	A	L	R
A/muscovy-duck/Vietnam/HN6113/2020	H5N6	2.3.4.4h	759	M	N	R	I	K	E	L	R	D	L	M	S	Q	S	R	T	R	E	I	L	T	K	T	T	V	D	H	M	A	I	I	K	K	Y	T	S	G	R	Q	E	K	N	P	A	L	R
A/muscovy-duck/Vietnam/HN6114/2020	H5N6	2.3.4.4h	759	M	N	R	I	K	E	L	R	D	L	M	S	Q	S	R	T	R	E	I	L	T	K	T	T	V	D	H	M	A	I	I	K	K	Y	T	S	G	R	Q	E	K	N	P	A	L	R
A/muscovy-duck/Vietnam/HN6115/2020	H5N6	2.3.4.4h	759	M	N	R	I	K	E	L	R	D	L	M	S	Q	S	R	T	R	E	I	L	T	K	T	T	V	D	H	M	A	I	I	K	K	Y	T	S	G	R	Q	E	K	N	P	A	L	R
A/muscovy-duck/Vietnam/HN6119/2020	H5N6	2.3.4.4h	759	M	N	R	I	K	E	L	R	D	L	M	S	Q	S	R	T	R	E	I	L	T	K	T	T	V	D	H	M	A	I	I	K	K	Y	T	S	G	R	Q	E	K	N	P	A	L	R
A/muscovy-duck/Vietnam/HN6120/2020	H5N6	2.3.4.4h	759	M	N	R	I	K	E	L	R	D	L	M	S	Q	S	R	T	R	E	I	L	T	K	T	T	V	D	H	M	A	I	I	K	K	Y	T	S	G	R	Q	E	K	N	P	A	L	R
A/muscovy-duck/Vietnam/HN6606/2020	H5N6	2.3.4.4h	759	M	N	R	I	K	E	L	R	D	L	M	S	Q	S	R	T	R	E	I	L	T	K	T	T	V	D	H	M	A	I	I	K	K	Y	T	S	G	R	Q	E	K	N	P	A	L	R
A/muscovy-duck/Vietnam/HN6607/2020	H5N6	2.3.4.4h	759	M	N	R	I	K	E	L	R	D	L	M	S	Q	S	R	T	R	E	I	L	T	K	T	T	V	D	H	M	A	I	I	K	K	Y	T	S	G	R	Q	E	K	N	P	A	L	R
A/muscovy-duck/Vietnam/HN6608/2020	H5N6	2.3.4.4h	759	M	N	R	I	K	E	L	R	D	L	M	S	Q	S	R	T	R	E	I	L	T	K	T	T	V	D	H	M	A	I	I	K	K	Y	T	S	G	R	Q	E	K	N	P	A	L	R
A/muscovy-duck/Vietnam/HN6609/2020	H5N6	2.3.4.4h	759	M	N	R	I	K	E	L	R	D	L	M	S	Q	S	R	T	R	E	I	L	T	K	T	T	V	D	H	M	A	I	I	K	K	Y	T	S	G	R	Q	E	K	N	P	A	L	R
A/muscovy-duck/Vietnam/HN6610/2020	H5N6	2.3.4.4h	759	M	N	R	I	K	E	L	R	D	L	M	S	Q	S	R	T	R	E	I	L	T	K	T	T	V	D	H	M	A	I	I	K	K	Y	T	S	G	R	Q	E	K	N	P	A	L	R
A/duck/Vietnam/HN6611/2020	H5N6	2.3.4.4h	759	M	N	R	I	K	E	L	R	D	L	M	S	Q	S	R	T	R	E	I	L	T	K	T	T	V	D	H	M	A	I	I	K	K	Y	T	S	G	R	Q	E	K	N	P	A	L	R
A/muscovy-duck/Vietnam/HN6692/2020	H5N6	2.3.4.4h	759	M	E	R	I	K	E	L	R	D	L	M	S	Q	S	R	T	R	E	I	L	T	K	T	T	V	D	H	M	A	I	I	K	K	Y	T	S	G	R	Q	E	K	N	P	A	L	R
A/muscovy-duck/Vietnam/HN6698/2020	H4H5N6	2.3.4.4h	759	M	E	R	I	K	E	L	R	D	L	M	S	Q	S	R	T	R	E	I	L	T	K	T	T	V	D	H	M	A	I	I	K	K	Y	T	S	G	R	Q	E	K	N	P	A	L	R
A/muscovy-duck/Vietnam/HN6699/2020	H4H5N6	2.3.4.4h	759	M	E	R	I	K	E	L	R	D	L	M	S	Q	S	R	T	R	E	I	L	T	K	T	T	V	D	H	M	A	I	I	K	K	Y	T	S	G	R	Q	E	K	N	P	A	L	R
A/muscovy-duck/Vietnam/HN6811/2020	H5H6N6	2.3.4.4h	759	M	N	R	I	K	E	L	R	D	L	M	S	Q	S	R	T	R	E	I	L	T	K	T	T	V	D	H	M	A	I	I	K	K	Y	T	S	G	R	Q	E	K	N	P	A	L	R
A/muscovy-duck/Vietnam/HN6881/2021	H5N6	2.3.4.4h	759	M	N	R	I	K	E	L	R	D	L	M	S	Q	S	R	T	R	E	I	L	T	K	T	T	V	D	H	M	A	I	I	K	K	Y	T	S	G	R	Q	E	K	N	P	A	L	R
A/muscovy-duck/Vietnam/HN6884/2021	H5N6	2.3.4.4h	759	M	N	R	I	K	E	L	R	D	L	M	S	Q	S	R	T	R	E	I	L	T	K	T	T	V	D	H	M	A	I	I	K	K	Y	T	S	G	R	Q	E	K	N	P	A	L	R
A/muscovy-duck/Vietnam/HN6890/2021	H5N6	2.3.4.4h	759	M	N	R	I	K	E	L	R	D	L	M	S	Q	S	R	T	R	E	I	L	T	K	T	T	V	D	H	M	A	I	I	K	K	Y	T	S	G	R	Q	E	K	N	P	A	L	R
A/duck/Vietnam/HN6893/2021	H5N6	2.3.4.4h	759	M	N	R	I	K	E	L	R	D	L	M	S	Q	S	R	T	R	E	I	L	T	K	T	T	V	D	H	M	A	I	I	K	K	Y	T	S	G	R	Q	E	K	N	P	A	L	R
A/duck/Vietnam/HN6894/2021	H5N6	2.3.4.4h	759	M	N	R	I	K	E	L	R	D	L	M	S	Q	S	R	T	R	E	I	L	T	K	T	T	V	D	H	M	A	I	I	K	K	Y	T	S	G	R	Q	E	K	N	P	A	L	R
A/duck/Vietnam/HN6896/2021	H5N6	2.3.4.4h	759	M	N	R	I	K	E	L	R	D	L	M	S	Q	S	R	T	R	E	I	L	T	K	T	T	V	D	H	M	A	I	I	K	K	Y	T	S	G	R	Q	E	K	N	P	A	L	R
A/duck/Vietnam/HN6897/2021	H5N6	2.3.4.4h	759	M	N	R	I	K	E	L	R	D	L	M	S	Q	S	R	T	R	E	I	L	T	K	T	T	V	D	H	M	A	I	I	K	K	Y	T	S	G	R	Q	E	K	N	P	A	L	R
A/duck/Vietnam/HN6898/2021	H5N6	2.3.4.4h	759	M	N	R	I	K	E	L	R	D	L	M	S	Q	S	R	T	R	E	I	L	T	K	T	T	V	D	H	M	A	I	I	K	K	Y	T	S	G	R	Q	E	K	N	P	A	L	R
A/duck/Vietnam/QN6519/2020	H5N6	2.3.4.4h	759	M	N	R	I	K	E	L	R	D	L	M	S	Q	S	R	T	R	E	I	L	T	K	T	T	V	D	H	M	A	I	I	K	K	Y	T	S	G	R	Q	E	K	N	P	A	L	R
A/duck/Vietnam/QN6658/2020	H5N6	2.3.4.4h	759	M	E	R	I	K	E	L	R	D	L	M	S	Q	S	R	T	R	E	I	L	T	K	T	T	V	D	H	M	A	I	I	K	K	Y	T	S	G	R	Q	E	K	N	P	A	L	R
A/duck/Vietnam/QN6659/2020	H5N6	2.3.4.4h	759	M	E	R	I	K	E	L	R	D	L	M	S	Q	S	R	T	R	E	I	L	T	K	T	T	V	D	H	M	A	I	I	K	K	Y	T	S	G	R	Q	E	K	N	P	A	L	R
A/duck/Vietnam/QN6660/2020	H5N6	2.3.4.4h	759	M	E	R	I	K	E	L	R	D	L	M	S	Q	S	R	T	R	E	I	L	T	K	T	T	V	D	H	M	A	I	I	K	K	Y	T	S	G	R	Q	E	K	N	P	A	L	R
A/duck/Vietnam/QN6661/2020	H5N6	2.3.4.4h	759	M	E	R	I	K	E	L	R	D	L	M	S	Q	S	R	T	R	E	I	L	T	K	T	T	V	D	H	M	A	I	I	K	K	Y	T	S	G	R	Q	E	K	N	P	A	L	R
A/duck/Vietnam/QN6730/2020	H5N6	2.3.4.4h	759	M	E	R	I	K	E	L	R	D	L	M	S	Q	S	R	T	R	E	I	L	T	K	T	T	V	D	H	M	A	I	I	K	K	Y	T	S	G	R	Q	E	K	N	P	A	L	R
A/duck/Vietnam/QN6736/2020	H4H5N2N6	2.3.4.4h	759	M	E	R	I	K	E	L	R	D	L	M	S	Q	P	R	T	R	E	I	L	T	K	T	T	V	D	H	M	A	I	I	K	K	Y	T	S	G	R	Q	E	K	N	P	A	L	R
A/duck/Vietnam/QN6739/2020	H5N6	2.3.4.4h	759	M	E	R	I	K	E	L	R	D	L	M	S	Q	S	R	T	R	E	I	L	T	K	T	T	V	D	H	M	A	I	I	K	K	Y	T	S	G	R	Q	E	K	N	P	A	L	R
A/duck/Vietnam/QN6796/2020	H5N6	2.3.4.4h	759	M	E	R	I	K	E	L	R	D	L	M	S	Q	S	R	T	R	E	I	L	T	K	T	T	V	D	H	M	A	I	I	K	K	Y	T	S	G	R	Q	E	K	N	P	A	L	R
A/duck/Vietnam/QN6798/2020	H5N6	2.3.4.4h	759	M	E	R	I	K	E	L	R	D	L	M	S	Q	S	R	T	R	E	I	L	T	K	T	T	V	D	H	M	A	I	I	K	K	Y	T	S	G	R	Q	E	K	N	P	A	L	R
A/duck/Vietnam/QN6799/2020	H5N6	2.3.4.4h	759	M	E	R	I	K	E	L	R	D	L	M	S	Q	S	R	T	R	E	I	L	T	K	T	T	V	D	H	M	A	I	I	K	K	Y	T	S	G	R	Q	E	K	N	P	A	L	R
A/duck/Vietnam/QN6800/2020	H5N6	2.3.4.4h	759	M	E	R	I	K	E	L	R	D	L	M	S	Q	S	R	T	R	E	I	L	T	K	T	T	V	D	H	M	A	I	I	K	K	Y	T	S	G	R	Q	E	K	N	P	A	L	R
A/duck/Vietnam/QN6801/2020	H5N6	2.3.4.4h	759	M	E	R	I	K	E	L	R	D	L	M	S	Q	S	R	T	R	E	I	L	T	K	T	T	V	D	H	M	A	I	I	K	K	Y	T	S	G	R	Q	E	K	N	P	A	L	R
A/duck/Vietnam/QN6803/2020	H3H5N2N6	2.3.4.4h	759	M	E	R	I	K	E	L	R	D	L	M	S	Q	S	R	T	R	E	I	L	T	K	T	T	V	D	H	M	A	I	I	K	K	Y	T	S	G	R	Q	E	K	N	P	A	L	R
A/duck/Vietnam/QN6804/2020	H5N6	2.3.4.4h	759	M	E	R	I	K	E	L	R	D	L	M	S	Q	S	R	T	R	E	I	L	T	K	T	T	V	D	H	M	A	I	I	K	K	Y	T	S	G	R	Q	E	K	N	P	A	L	R
A/duck/Vietnam/QN6805/2020	H5N6	2.3.4.4h	759	M	E	R	I	K	E	L	R	D	L	M	S	Q	S	R	T	R	E	I	L	T	K	T	T	V	D	H	M	A	I	I	K	K	Y	T	S	G	R	Q	E	K	N	P	A	L	R
A/duck/Vietnam/QN6806/2020	H5N6	2.3.4.4h	759	M	E	R	I	K	E	L	R	D	L	M	S	Q	S	R	T	R	E	I	L	T	K	T	T	V	D	H	M	A	I	I	K	K	Y	T	S	G	R	Q	E	K	N	P	A	L	R
A/duck/Vietnam/QN6807/2020	H3H5N2N6N8	2.3.4.4h	759	M	E	R	I	K	E	L	R	D	L	M	S	Q	S	R	T	R	E	I	L	T	K	T	T	V	D	H	M	A	I	I	K	K	Y	T	S	G	R	Q	E	K	N	P	A	L	R
A/duck/Vietnam/QN6808/2020	H5N6	2.3.4.4h	759	M	E	R	I	K	E	L	R	D	L	M	S	Q	S	R	T	R	E	I	L	T	K	T	T	V	D	H	M	A	I	I	K	K	Y	T	S	G	R	Q	E	K	N	P	A	L	R
A/duck/Vietnam/QN6809/2020	H3H5N6	2.3.4.4h	759	M	E	R	I	K	E	L	R	D	L	M	S	Q	S	R	T	R	E	I	L	T	K	T	T	V	D	H	M	A	I	I	K	K	Y	T	S	G	R	Q	E	K	N	P	A	L	R
A/duck/Vietnam/HN5141/2018	H5N6	2.3.4.4g	759	M	E	R	I	K	E	L	R	D	L	M	S	Q	S	R	T	R	E	I	L	T	K	T	T	V	D	H	M	A	I	I	K	K	Y	T	S	G	R	Q	E	K	N	P	A	L	R
A/duck/Vietnam/HN5142/2018	H5N6	2.3.4.4g	759	M	E	R	I	K	E	L	R	D	L	M	S	Q	S	R	T	R	E	I	L	T	K	T	T	V	D	H	M	A	I	I	K	K	Y	T	S	G	R	Q	E	K	N	P	A	L	R
A/duck/Vietnam/HN5143/2018	H5N6	2.3.4.4g	759	M	E	R	I	K	E	L	R	D	L	M	S	Q	S	R	T	R	E	I	L	T	K	T	T	V	D	H	M	A	I	I	K	K	Y	T	S	G	R	Q	E	K	N	P	A	L	R
A/duck/Vietnam/HN5144/2018	H5N6*	2.3.4.4g	759	M	E	R	I	K	E	L	R	D	L	M	S	Q	S	R	T	R	E	I	L	T	K	T	T	V	D	H	M	A	I	I	K	K	Y	T	S	G	R	Q	E	K	N	P	A	L	R
A/duck/Vietnam/HN5145/2018	H5N6	2.3.4.4g	759	M	E	R	I	K	E	L	R	D	L	M	S	Q	S	R	T	R	E	I	L	T	K	T	T	V	D	H	M	A	I	I	K	K	Y	T	S	G	R	Q	E	K	N	P	A	L	R
A/duck/Vietnam/HN5147/2018	H5N6	2.3.4.4g	759	M	E	R	I	K	E	L	R	D	L	M	S	Q	S	R	T	R	E	I	L	T	K	T	T	V	D	H	M	A	I	I	K	K	Y	T	S	G	R	Q	E	K	N	P	A	L	R
A/duck/Vietnam/HN5148/2018	H5N6*	2.3.4.4g	759	M	E	R	I	K	E	L	R	D	L	M	S	Q	S	R	T	R	E	I	L	T	K	T	T	V	D	H	M	A	I	I	K	K	Y	T	S	G	R	Q	E	K	N	P	A	L	R
A/duck/Vietnam/HN5149/2018	H5N6	2.3.4.4g	759	M	E	R	I	K	E	L	R	D	L	M	S	Q	S	R	T	R	E	I	L	T	K	T	T	V	D	H	M	A	I	I	K	K	Y	T	S	G	R	Q	E	K	N	P	A	L	R
*Samples did not show 'mixed' HA sequences, but they did show 'mixed' N6 NA and mixed PB2, PB1, PA, and NS1 sequences.
[truncated: 713 more columns]

## Sheet: A_PB1
Supplemental Table 2: Consensus sequences of viral proteins isolated in this study.
Virus	Subtype	Clade	Protein Length	1	2	3	4	5	6	7	8	9	10	11	12	13	14	15	16	17	18	19	20	21	22	23	24	25	26	27	28	29	30	31	32	33	34	35	36	37	38	39	40	41	42	43	44	45	46
A/muscovy-duck/Vietnam/HN4711/2018	H5N6	2.3.4.4h	757	M	D	V	N	P	T	L	L	F	L	K	V	P	V	Q	N	A	I	S	T	T	F	P	Y	T	G	D	P	P	Y	S	H	G	T	G	T	G	Y	T	M	D	T	V	N	R	T
A/muscovy-duck/Vietnam/HN4713/2018	H5N6	2.3.4.4h	757	M	D	V	N	P	T	L	L	F	L	K	V	P	V	Q	N	A	I	S	T	T	F	P	Y	T	G	D	P	P	Y	S	H	G	T	G	T	G	Y	T	M	D	T	V	N	R	T
A/muscovy-duck/Vietnam/HN4714/2018	H5N6	2.3.4.4h	757	M	D	V	N	P	T	L	L	F	L	K	V	P	V	Q	N	A	I	S	T	T	F	P	Y	T	G	D	P	P	Y	S	H	G	T	G	T	G	Y	T	M	D	T	V	N	R	T
A/muscovy-duck/Vietnam/HN4715/2018	H5N6	2.3.4.4h	757	M	D	V	N	P	T	L	L	F	L	K	V	P	V	Q	N	A	I	S	T	T	F	P	Y	T	G	D	P	P	Y	S	H	G	T	G	T	G	Y	T	M	D	T	V	N	R	T
A/muscovy-duck/Vietnam/HN4716/2018	H5N6	2.3.4.4h	757	M	D	V	N	P	T	L	L	F	L	K	V	P	V	Q	N	A	I	S	T	T	F	P	Y	T	G	D	P	P	Y	S	H	G	T	G	T	G	Y	T	M	D	T	V	N	R	T
A/muscovy-duck/Vietnam/HN4718/2018	H5N6	2.3.4.4h	757	M	D	V	N	P	T	L	L	F	L	K	V	P	V	Q	N	A	I	S	T	T	F	P	Y	T	G	D	P	P	Y	S	H	G	T	G	T	G	Y	T	M	D	T	V	N	R	T
A/muscovy-duck/Vietnam/HN4719/2018	H5N6	2.3.4.4h	757	M	D	V	N	P	T	L	L	F	L	K	V	P	V	Q	N	A	I	S	T	T	F	P	Y	T	G	D	P	P	Y	S	H	G	T	G	T	G	Y	T	M	D	T	V	N	R	T
A/muscovy-duck/Vietnam/HN4720/2018	H5N6	2.3.4.4h	757	M	D	V	N	P	T	L	L	F	L	K	V	P	V	Q	N	A	I	S	T	T	F	P	Y	T	G	D	P	P	Y	S	H	G	T	G	T	G	Y	T	M	D	T	V	N	R	T
A/duck/Vietnam/HN4721/2018	H5N6	2.3.4.4h	757	M	D	V	N	P	T	L	L	F	L	K	V	P	V	Q	N	A	I	S	T	T	F	P	Y	T	G	D	P	P	Y	S	H	G	T	G	T	G	Y	T	M	D	T	V	N	R	T
A/muscovy-duck/Vietnam/HN4856/2018	H5N6	2.3.4.4h	757	M	D	V	N	P	T	L	L	F	L	K	V	P	V	Q	N	A	I	S	T	T	F	P	Y	T	G	D	P	P	Y	S	H	G	T	G	T	G	Y	T	M	D	T	V	N	R	T
A/muscovy-duck/Vietnam/HN4857/2018	H5N6	2.3.4.4h	757	M	D	V	N	P	T	L	L	F	L	K	V	P	V	Q	N	A	I	S	T	T	F	P	Y	T	G	D	P	P	Y	S	H	G	T	G	T	G	Y	T	M	D	T	V	N	R	T
A/muscovy-duck/Vietnam/HN4858/2018	H5N6	2.3.4.4h	757	M	D	V	N	P	T	L	L	F	L	K	V	P	V	Q	N	A	I	S	T	T	F	P	Y	T	G	D	P	P	Y	S	H	G	T	G	T	G	Y	T	M	D	T	V	N	R	T
A/muscovy-duck/Vietnam/HN5046/2018	H5N6	2.3.4.4h	757	M	D	V	N	P	T	L	L	F	L	K	V	P	V	Q	N	A	I	S	T	T	F	P	Y	T	G	D	P	P	Y	S	H	G	T	G	T	G	Y	T	M	D	T	V	N	R	T
A/muscovy-duck/Vietnam/HN5047/2018	H5N6	2.3.4.4h	757	M	D	V	N	P	T	L	L	F	L	K	V	P	V	Q	N	A	I	S	T	T	F	P	Y	T	G	D	P	P	Y	S	H	G	T	G	T	G	Y	T	M	D	T	V	N	R	T
A/muscovy-duck/Vietnam/HN5048/2018	H5N6	2.3.4.4h	757	M	D	V	N	P	T	L	L	F	L	K	V	P	V	Q	N	A	I	S	T	T	F	P	Y	T	G	D	P	P	Y	S	H	G	T	G	T	G	Y	T	M	D	T	V	N	R	T
A/duck/Vietnam/HN5080/2018	H5N6	2.3.4.4h	757	M	D	V	N	P	T	L	L	F	L	K	V	P	V	Q	N	A	I	S	T	T	F	P	Y	T	G	D	P	P	Y	S	H	G	T	G	T	G	Y	T	M	D	T	V	N	R	T
A/muscovy-duck/Vietnam/HN5132/2018	H5N6	2.3.4.4h	757	M	D	V	N	P	T	L	L	F	L	K	V	P	V	Q	N	A	I	S	T	T	F	P	Y	T	G	D	P	P	Y	S	H	G	T	G	T	G	Y	T	M	D	T	V	N	R	T
A/muscovy-duck/Vietnam/HN5135/2018	H5N6	2.3.4.4h	757	M	D	V	N	P	T	L	L	F	L	K	V	P	V	Q	N	A	I	S	T	T	F	P	Y	T	G	D	P	P	Y	S	H	G	T	G	T	G	Y	T	M	D	T	V	N	R	T
A/muscovy-duck/Vietnam/HN5137/2018	H5N6	2.3.4.4h	757	M	D	V	N	P	T	L	L	F	L	K	V	P	V	Q	N	A	I	S	T	T	F	P	Y	T	G	D	P	P	Y	S	H	G	T	G	T	G	Y	T	M	D	T	V	N	R	T
A/muscovy-duck/Vietnam/HN5138/2018	H5N6	2.3.4.4h	757	M	D	V	N	P	T	L	L	F	L	K	V	P	V	Q	N	A	I	S	T	T	F	P	Y	T	G	D	P	P	Y	S	H	G	T	G	T	G	Y	T	M	D	T	V	N	R	T
A/muscovy-duck/Vietnam/HN5139/2018	H5N6	2.3.4.4h	757	M	D	V	N	P	T	L	L	F	L	K	V	P	V	Q	N	A	I	S	T	T	F	P	Y	T	G	D	P	P	Y	S	H	G	T	G	T	G	Y	T	M	D	T	V	N	R	T
A/muscovy-duck/Vietnam/HN5140/2018	H5H9N2N6	2.3.4.4h	757	M	D	V	N	P	T	L	L	F	L	K	V	P	V	Q	N	A	I	S	T	T	F	P	Y	T	G	D	P	P	Y	S	H	G	T	G	T	G	Y	T	M	D	T	V	N	R	T
A/muscovy-duck/Vietnam/HN5049/2018	H5N6	2.3.4.4h	757	M	D	V	N	P	T	L	L	F	L	K	V	P	V	Q	N	A	I	S	T	T	F	P	Y	T	G	D	P	P	Y	S	H	G	T	G	T	G	Y	T	M	D	T	V	N	R	T
A/duck/Vietnam/HN5150/2018	H5H6N6	2.3.4.4h	757	M	D	V	N	P	T	L	L	F	L	K	V	P	A	Q	N	A	I	S	T	T	F	P	Y	T	G	D	P	P	Y	S	H	G	T	G	T	G	Y	T	M	D	T	V	N	R	T
A/muscovy-duck/Vietnam/HN6029/2019	H5H6N6N8	2.3.4.4h	757	M	D	V	N	P	T	L	L	F	L	K	V	P	A	Q	N	A	I	S	T	T	F	P	Y	T	G	D	P	P	Y	S	H	G	T	G	T	G	Y	T	M	D	T	V	N	R	T
A/muscovy-duck/Vietnam/HN6111/2020	H5N6	2.3.4.4h	757	M	D	V	N	P	T	L	L	F	L	K	V	P	V	Q	N	A	I	S	T	T	F	P	Y	T	G	D	P	P	Y	S	H	G	T	G	T	G	Y	T	M	D	T	V	N	R	T
A/muscovy-duck/Vietnam/HN6113/2020	H5N6	2.3.4.4h	757	M	D	V	N	P	T	L	L	F	L	K	V	P	V	Q	N	A	I	S	T	T	F	P	Y	T	G	D	P	P	Y	S	H	G	T	G	T	G	Y	T	M	D	T	V	N	R	T
A/muscovy-duck/Vietnam/HN6114/2020	H5N6	2.3.4.4h	757	M	D	V	N	P	T	L	L	F	L	K	V	P	V	Q	N	A	I	S	T	T	F	P	Y	T	G	D	P	P	Y	S	H	G	T	G	T	G	Y	T	M	D	T	V	N	R	T
A/muscovy-duck/Vietnam/HN6115/2020	H5N6	2.3.4.4h	757	M	D	V	N	P	T	L	L	F	L	K	V	P	V	Q	N	A	I	S	T	T	F	P	Y	T	G	D	P	P	Y	S	H	G	T	G	T	G	Y	T	M	D	T	V	N	R	T
A/muscovy-duck/Vietnam/HN6119/2020	H5N6	2.3.4.4h	757	M	D	V	N	P	T	L	L	F	L	K	V	P	V	Q	N	A	I	S	T	T	F	P	Y	T	G	D	P	P	Y	S	H	G	T	G	T	G	Y	T	M	D	T	V	N	R	T
A/muscovy-duck/Vietnam/HN6120/2020	H5N6	2.3.4.4h	757	M	D	V	N	P	T	L	L	F	L	K	V	P	V	Q	N	A	I	S	T	T	F	P	Y	T	G	D	P	P	Y	S	H	G	T	G	T	G	Y	T	M	D	T	V	N	R	T
A/muscovy-duck/Vietnam/HN6606/2020	H5N6	2.3.4.4h	757	M	D	V	N	P	T	L	L	F	L	K	V	P	V	Q	N	A	I	S	T	T	F	P	Y	T	G	D	P	P	Y	S	H	G	T	G	T	G	Y	T	M	D	T	V	N	R	T
A/muscovy-duck/Vietnam/HN6607/2020	H5N6	2.3.4.4h	757	M	D	V	N	P	T	L	L	F	L	K	V	P	V	Q	N	A	I	S	T	T	F	P	Y	T	G	D	P	P	Y	S	H	G	T	G	T	G	Y	T	M	D	T	V	N	R	T
A/muscovy-duck/Vietnam/HN6608/2020	H5N6	2.3.4.4h	757	M	D	V	N	P	T	L	L	F	L	K	V	P	V	Q	N	A	I	S	T	T	F	P	Y	T	G	D	P	P	Y	S	H	G	T	G	T	G	Y	T	M	D	T	V	N	R	T
A/muscovy-duck/Vietnam/HN6609/2020	H5N6	2.3.4.4h	757	M	D	V	N	P	T	L	L	F	L	K	V	P	V	Q	N	A	I	S	T	T	F	P	Y	T	G	D	P	P	Y	S	H	G	T	G	T	G	Y	T	M	D	T	V	N	R	T
A/muscovy-duck/Vietnam/HN6610/2020	H5N6	2.3.4.4h	757	M	D	V	N	P	T	L	L	F	L	K	V	P	V	Q	N	A	I	S	T	T	F	P	Y	T	G	D	P	P	Y	S	H	G	T	G	T	G	Y	T	M	D	T	V	N	R	T
A/duck/Vietnam/HN6611/2020	H5N6	2.3.4.4h	757	M	D	V	N	P	T	L	L	F	L	K	V	P	V	Q	N	A	I	S	T	T	F	P	Y	T	G	D	P	P	Y	S	H	G	T	G	T	G	Y	T	M	D	T	V	N	R	T
A/muscovy-duck/Vietnam/HN6692/2020	H5N6	2.3.4.4h	757	M	D	V	N	P	T	L	L	F	L	K	V	P	A	Q	N	A	I	S	T	T	F	P	Y	T	G	D	P	P	Y	S	H	G	T	G	T	G	Y	T	M	D	T	V	N	R	T
A/muscovy-duck/Vietnam/HN6698/2020	H4H5N6	2.3.4.4h	757	M	D	V	N	P	T	L	L	F	L	K	V	P	A	Q	N	A	I	S	T	T	F	P	Y	T	G	D	P	P	Y	S	H	G	T	G	T	G	Y	T	M	D	T	V	N	R	T
A/muscovy-duck/Vietnam/HN6699/2020	H4H5N6	2.3.4.4h	757	M	D	V	N	P	T	L	L	F	L	K	V	P	A	Q	N	A	I	S	T	T	F	P	Y	T	G	D	P	P	Y	S	H	G	T	G	T	G	Y	T	M	D	T	V	N	R	T
A/muscovy-duck/Vietnam/HN6811/2020	H5H6N6	2.3.4.4h	757	M	D	V	N	P	T	L	L	F	L	K	V	P	A	Q	N	A	I	S	T	T	F	P	Y	T	G	D	P	P	Y	S	H	G	T	G	T	G	Y	T	M	D	T	V	N	R	T
A/muscovy-duck/Vietnam/HN6881/2021	H5N6	2.3.4.4h	757	M	D	V	N	P	T	L	L	F	L	K	V	P	V	Q	N	A	I	S	T	T	F	P	Y	T	G	D	P	P	Y	S	H	G	T	G	T	G	Y	T	M	D	T	V	N	R	T
A/muscovy-duck/Vietnam/HN6884/2021	H5N6	2.3.4.4h	757	M	D	V	N	P	T	L	L	F	L	K	V	P	V	Q	N	A	I	S	T	T	F	P	Y	T	G	D	P	P	Y	S	H	G	T	G	T	G	Y	T	M	D	T	V	N	R	T
A/muscovy-duck/Vietnam/HN6890/2021	H5N6	2.3.4.4h	757	M	D	V	N	P	T	L	L	F	L	K	V	P	V	Q	N	A	I	S	T	T	F	P	Y	T	G	D	P	P	Y	S	H	G	T	G	T	G	Y	T	M	D	T	V	N	R	T
A/duck/Vietnam/HN6893/2021	H5N6	2.3.4.4h	757	M	D	V	N	P	T	L	L	F	L	K	V	P	V	Q	N	A	I	S	T	T	F	P	Y	T	G	D	P	P	Y	S	H	G	T	G	T	G	Y	T	M	D	T	V	N	R	T
A/duck/Vietnam/HN6894/2021	H5N6	2.3.4.4h	757	M	D	V	N	P	T	L	L	F	L	K	V	P	V	Q	N	A	I	S	T	T	F	P	Y	T	G	D	P	P	Y	S	H	G	T	G	T	G	Y	T	M	D	T	V	N	R	T
A/duck/Vietnam/HN6896/2021	H5N6	2.3.4.4h	757	M	D	V	N	P	T	L	L	F	L	K	V	P	V	Q	N	A	I	S	T	T	F	P	Y	T	G	D	P	P	Y	S	H	G	T	G	T	G	Y	T	M	D	T	V	N	R	T
A/duck/Vietnam/HN6897/2021	H5N6	2.3.4.4h	757	M	D	V	N	P	T	L	L	F	L	K	V	P	V	Q	N	A	I	S	T	T	F	P	Y	T	G	D	P	P	Y	S	H	G	T	G	T	G	Y	T	M	D	T	V	N	R	T
A/duck/Vietnam/HN6898/2021	H5N6	2.3.4.4h	757	M	D	V	N	P	T	L	L	F	L	K	V	P	V	Q	N	A	I	S	T	T	F	P	Y	T	G	D	P	P	Y	S	H	G	T	G	T	G	Y	T	M	D	T	V	N	R	T
A/duck/Vietnam/QN6519/2020	H5N6	2.3.4.4h	757	M	D	V	N	P	T	L	L	F	L	K	V	P	V	Q	N	A	I	S	T	T	F	P	Y	T	G	D	P	P	Y	S	H	G	T	G	T	G	Y	T	M	D	T	V	N	R	T
A/duck/Vietnam/QN6658/2020	H5N6	2.3.4.4h	757	M	D	V	N	P	T	L	L	F	L	K	V	P	A	Q	N	A	I	S	T	T	F	P	Y	T	G	D	P	P	Y	S	H	G	T	G	T	G	Y	T	M	D	T	V	N	R	T
A/duck/Vietnam/QN6659/2020	H5N6	2.3.4.4h	757	M	D	V	N	P	T	L	L	F	L	K	V	P	A	Q	N	A	I	S	T	T	F	P	Y	T	G	D	P	P	Y	S	H	G	T	G	T	G	Y	T	M	D	T	V	N	R	T
A/duck/Vietnam/QN6660/2020	H5N6	2.3.4.4h	757	M	D	V	N	P	T	L	L	F	L	K	V	P	A	Q	N	A	I	S	T	T	F	P	Y	T	G	D	P	P	Y	S	H	G	T	G	T	G	Y	T	M	D	T	V	N	R	T
A/duck/Vietnam/QN6661/2020	H5N6	2.3.4.4h	757	M	D	V	N	P	T	L	L	F	L	K	V	P	A	Q	N	A	I	S	T	T	F	P	Y	T	G	D	P	P	Y	S	H	G	T	G	T	G	Y	T	M	D	T	V	N	R	T
A/duck/Vietnam/QN6730/2020	H5N6	2.3.4.4h	757	M	D	V	N	P	T	L	L	F	L	K	V	P	A	Q	N	A	I	S	T	T	F	P	Y	T	G	D	P	P	Y	S	H	G	T	G	T	G	Y	T	M	D	T	V	N	R	T
A/duck/Vietnam/QN6736/2020	H4H5N2N6	2.3.4.4h	757	M	D	V	N	P	T	L	L	F	L	K	V	P	A	Q	N	A	I	S	T	T	F	P	Y	T	G	D	P	P	Y	S	H	G	T	G	T	G	Y	T	M	D	T	V	N	R	T
A/duck/Vietnam/QN6739/2020	H5N6	2.3.4.4h	757	M	D	V	N	P	T	L	L	F	L	K	V	P	A	Q	N	A	I	S	T	T	F	P	Y	T	G	D	P	P	Y	S	H	G	T	G	T	G	Y	T	M	D	T	V	N	R	T
A/duck/Vietnam/QN6796/2020	H5N6	2.3.4.4h	757	M	D	V	N	P	T	L	L	F	L	K	V	P	A	Q	N	A	I	S	T	T	F	P	Y	T	G	D	P	P	Y	S	H	G	T	G	T	G	Y	T	M	D	T	V	N	R	T
A/duck/Vietnam/QN6798/2020	H5N6	2.3.4.4h	757	M	D	V	N	P	T	L	L	F	L	K	V	P	A	Q	N	A	I	S	T	T	F	P	Y	T	G	D	P	P	Y	S	H	G	T	G	T	G	Y	T	M	D	T	V	N	R	T
A/duck/Vietnam/QN6799/2020	H5N6	2.3.4.4h	757	M	D	V	N	P	T	L	L	F	L	K	V	P	A	Q	N	A	I	S	T	T	F	P	Y	T	G	D	P	P	Y	S	H	G	T	G	T	G	Y	T	M	D	T	V	N	R	T
A/duck/Vietnam/QN6800/2020	H5N6	2.3.4.4h	757	M	D	V	N	P	T	L	L	F	L	K	V	P	A	Q	N	A	I	S	T	T	F	P	Y	T	G	D	P	P	Y	S	H	G	T	G	T	G	Y	T	M	D	T	V	N	R	T
A/duck/Vietnam/QN6801/2020	H5N6	2.3.4.4h	757	M	D	V	N	P	T	L	L	F	L	K	V	P	A	Q	N	A	I	S	T	T	F	P	Y	T	G	D	P	P	Y	S	H	G	T	G	T	G	Y	T	M	D	T	V	N	R	T
A/duck/Vietnam/QN6803/2020	H3H5N2N6	2.3.4.4h	757	M	D	V	N	P	T	L	L	F	L	K	V	P	A	Q	N	A	I	S	T	T	F	P	Y	T	G	D	P	P	Y	S	H	G	T	G	T	G	Y	T	M	D	T	V	N	R	T
A/duck/Vietnam/QN6804/2020	H5N6	2.3.4.4h	757	M	D	V	N	P	T	L	L	F	L	K	V	P	A	Q	N	A	I	S	T	T	F	P	Y	T	G	D	P	P	Y	S	H	G	T	G	T	G	Y	T	M	D	T	V	N	R	T
A/duck/Vietnam/QN6805/2020	H5N6	2.3.4.4h	757	M	D	V	N	P	T	L	L	F	L	K	V	P	A	Q	N	A	I	S	T	T	F	P	Y	T	G	D	P	P	Y	S	H	G	T	G	T	G	Y	T	M	D	T	V	N	R	T
A/duck/Vietnam/QN6806/2020	H5N6	2.3.4.4h	757	M	D	V	N	P	T	L	L	F	L	K	V	P	A	Q	N	A	I	S	T	T	F	P	Y	T	G	D	P	P	Y	S	H	G	T	G	T	G	Y	T	M	D	T	V	N	R	T
A/duck/Vietnam/QN6807/2020	H3H5N2N6N8	2.3.4.4h	757	M	D	V	N	P	T	L	L	F	L	K	V	P	A	Q	N	A	I	S	T	T	F	P	Y	T	G	D	P	P	Y	S	H	G	T	G	T	G	Y	T	M	D	T	V	N	R	T
A/duck/Vietnam/QN6808/2020	H5N6	2.3.4.4h	757	M	D	V	N	P	T	L	L	F	L	K	V	P	A	Q	N	A	I	S	T	T	F	P	Y	T	G	D	P	P	Y	S	H	G	T	G	T	G	Y	T	M	D	T	V	N	R	T
A/duck/Vietnam/QN6809/2020	H3H5N6	2.3.4.4h	757	M	D	V	N	P	T	L	L	F	L	K	V	P	A	Q	N	A	I	S	T	T	F	P	Y	T	G	D	P	P	Y	S	H	G	T	G	T	G	Y	T	M	D	T	V	N	R	T
A/duck/Vietnam/HN5141/2018	H5N6	2.3.4.4g	757	M	D	V	N	P	T	L	L	F	L	K	V	P	A	Q	N	A	I	S	T	T	F	P	Y	T	G	D	P	P	Y	S	H	G	T	G	T	G	Y	T	M	D	T	V	N	R	T
A/duck/Vietnam/HN5142/2018	H5N6	2.3.4.4g	757	M	D	V	N	P	T	L	L	F	L	K	V	P	A	Q	N	A	I	S	T	T	F	P	Y	T	G	D	P	P	Y	S	H	G	T	G	T	G	Y	T	M	D	T	V	N	R	T
A/duck/Vietnam/HN5143/2018	H5N6	2.3.4.4g	757	M	D	V	N	P	T	L	L	F	L	K	V	P	A	Q	N	A	I	S	T	T	F	P	Y	T	G	D	P	P	Y	S	H	G	T	G	T	G	Y	T	M	D	T	V	N	R	T
A/duck/Vietnam/HN5144/2018	H5N6*	2.3.4.4g	757	M	D	V	N	P	T	L	L	F	L	K	V	P	A	Q	N	A	I	S	T	T	F	P	Y	T	G	D	P	P	Y	S	H	G	T	G	T	G	Y	T	M	D	T	V	N	R	T
A/duck/Vietnam/HN5145/2018	H5N6	2.3.4.4g	757	M	D	V	N	P	T	L	L	F	L	K	V	P	A	Q	N	A	I	S	T	T	F	P	Y	T	G	D	P	P	Y	S	H	G	T	G	T	G	Y	T	M	D	T	V	N	R	T
A/duck/Vietnam/HN5147/2018	H5N6	2.3.4.4g	757	M	D	V	N	P	T	L	L	F	L	K	V	P	A	Q	N	A	I	S	T	T	F	P	Y	T	G	D	P	P	Y	S	H	G	T	G	T	G	Y	T	M	D	T	V	N	R	T
A/duck/Vietnam/HN5148/2018	H5N6*	2.3.4.4g	757	M	D	V	N	P	T	L	L	F	L	K	V	P	A	Q	N	A	I	S	T	T	F	P	Y	T	G	D	P	P	Y	S	H	G	T	G	T	G	Y	T	M	D	T	V	N	R	T
A/duck/Vietnam/HN5149/2018	H5N6	2.3.4.4g	757	M	D	V	N	P	T	L	L	F	L	K	V	P	A	Q	N	A	I	S	T	T	F	P	Y	T	G	D	P	P	Y	S	H	G	T	G	T	G	Y	T	M	D	T	V	N	R	T
*Samples did not show 'mixed' HA sequences, but they did show 'mixed' N6 NA and mixed PB2, PB1, PA, and NS1 sequences.
[truncated: 711 more columns]

## Sheet: A_PB1-F2
Supplemental Table 2: Consensus sequences of viral proteins isolated in this study.
Virus	Subtype	Clade	Protein Length	1	2	3	4	5	6	7	8	9	10	11	12	13	14	15	16	17	18	19	20	21	22	23	24	25	26	27	28	29	30	31	32	33	34	35	36	37	38	39	40	41	42	43	44	45	46
A/muscovy-duck/Vietnam/HN4711/2018	H5N6	2.3.4.4h	11	M	E	Q	E	Q	G	T	P	W	T	Q
A/muscovy-duck/Vietnam/HN4713/2018	H5N6	2.3.4.4h	11	M	E	Q	E	Q	G	T	P	W	T	Q
A/muscovy-duck/Vietnam/HN4714/2018	H5N6	2.3.4.4h	11	M	E	Q	E	Q	G	T	P	W	T	Q
A/muscovy-duck/Vietnam/HN4715/2018	H5N6	2.3.4.4h	11	M	E	Q	E	Q	G	T	P	W	T	Q
A/muscovy-duck/Vietnam/HN4716/2018	H5N6	2.3.4.4h	11	M	E	Q	E	Q	G	T	P	W	T	Q
A/muscovy-duck/Vietnam/HN4718/2018	H5N6	2.3.4.4h	11	M	E	Q	E	Q	G	T	P	W	T	Q
A/muscovy-duck/Vietnam/HN4719/2018	H5N6	2.3.4.4h	11	M	E	Q	E	Q	G	T	P	W	T	Q
A/muscovy-duck/Vietnam/HN4720/2018	H5N6	2.3.4.4h	11	M	E	Q	E	Q	G	T	P	W	T	Q
A/duck/Vietnam/HN4721/2018	H5N6	2.3.4.4h	11	M	E	Q	E	Q	G	T	P	W	T	Q
A/muscovy-duck/Vietnam/HN4856/2018	H5N6	2.3.4.4h	11	M	E	Q	E	Q	G	T	P	W	T	Q
A/muscovy-duck/Vietnam/HN4857/2018	H5N6	2.3.4.4h	11	M	E	Q	E	Q	G	T	P	W	T	Q
A/muscovy-duck/Vietnam/HN4858/2018	H5N6	2.3.4.4h	11	M	E	Q	E	Q	G	T	P	W	T	Q
A/muscovy-duck/Vietnam/HN5046/2018	H5N6	2.3.4.4h	11	M	E	Q	E	Q	G	T	P	W	T	Q
A/muscovy-duck/Vietnam/HN5047/2018	H5N6	2.3.4.4h	11	M	E	Q	E	Q	G	T	P	W	T	Q
A/muscovy-duck/Vietnam/HN5048/2018	H5N6	2.3.4.4h	11	M	E	Q	E	Q	G	T	P	W	T	Q
A/duck/Vietnam/HN5080/2018	H5N6	2.3.4.4h	11	M	E	Q	E	Q	G	T	P	W	T	Q
A/muscovy-duck/Vietnam/HN5132/2018	H5N6	2.3.4.4h	11	M	E	Q	E	Q	G	T	P	W	T	Q
A/muscovy-duck/Vietnam/HN5135/2018	H5N6	2.3.4.4h	11	M	E	Q	E	Q	G	T	P	W	T	Q
A/muscovy-duck/Vietnam/HN5137/2018	H5N6	2.3.4.4h	11	M	E	Q	E	Q	G	T	P	W	T	Q
A/muscovy-duck/Vietnam/HN5138/2018	H5N6	2.3.4.4h	11	M	E	Q	E	Q	G	T	P	W	T	Q
A/muscovy-duck/Vietnam/HN5139/2018	H5N6	2.3.4.4h	11	M	E	Q	E	Q	G	T	P	W	T	Q
A/muscovy-duck/Vietnam/HN5140/2018	H5H9N2N6	2.3.4.4h	90	M	E	Q	E	Q	G	T	P	W	T	Q	S	T	E	H	T	N	T	R	K	K	E	N	G	Q	Q	T	Q	R	L	E	H	P	N	S	I	R	L	M	D	R	C	L	R	T	T
A/muscovy-duck/Vietnam/HN5049/2018	H5N6	2.3.4.4h	11	M	E	Q	E	Q	G	T	P	W	T	Q
A/duck/Vietnam/HN5150/2018	H5H6N6	2.3.4.4h	34	M	E	Q	E	Q	D	T	P	W	T	Q	S	T	E	H	I	N	I	Q	K	G	E	N	G	Q	Q	T	Q	R	P	E	H	P	N
A/muscovy-duck/Vietnam/HN6029/2019	H5H6N6N8	2.3.4.4h	90	M	E	Q	E	Q	D	T	Q	W	T	Q	S	T	E	H	I	N	T	Q	K	R	G	N	G	Q	Q	T	Q	K	L	E	H	P	N	S	T	Q	L	M	D	H	Y	P	R	T	T
A/muscovy-duck/Vietnam/HN6111/2020	H5N6	2.3.4.4h	11	M	E	Q	E	Q	G	T	P	W	T	Q
A/muscovy-duck/Vietnam/HN6113/2020	H5N6	2.3.4.4h	11	M	E	Q	E	Q	G	T	P	W	T	Q
A/muscovy-duck/Vietnam/HN6114/2020	H5N6	2.3.4.4h	11	M	E	Q	E	Q	G	T	P	W	T	Q
A/muscovy-duck/Vietnam/HN6115/2020	H5N6	2.3.4.4h	11	M	E	Q	E	Q	G	T	P	W	T	Q
A/muscovy-duck/Vietnam/HN6119/2020	H5N6	2.3.4.4h	11	M	E	Q	E	Q	G	T	P	W	T	Q
A/muscovy-duck/Vietnam/HN6120/2020	H5N6	2.3.4.4h	11	M	E	Q	E	Q	G	T	P	W	T	Q
A/muscovy-duck/Vietnam/HN6606/2020	H5N6	2.3.4.4h	11	M	E	Q	E	Q	G	T	P	W	T	Q
A/muscovy-duck/Vietnam/HN6607/2020	H5N6	2.3.4.4h	11	M	E	Q	E	Q	G	T	P	W	T	Q
A/muscovy-duck/Vietnam/HN6608/2020	H5N6	2.3.4.4h	11	M	E	Q	E	Q	G	T	P	W	T	Q
A/muscovy-duck/Vietnam/HN6609/2020	H5N6	2.3.4.4h	11	M	E	Q	E	Q	G	T	P	W	T	Q
A/muscovy-duck/Vietnam/HN6610/2020	H5N6	2.3.4.4h	11	M	E	Q	E	Q	G	T	P	W	T	Q
A/duck/Vietnam/HN6611/2020	H5N6	2.3.4.4h	11	M	E	Q	E	Q	G	T	P	W	T	Q
A/muscovy-duck/Vietnam/HN6692/2020	H5N6	2.3.4.4h	90	M	E	Q	E	Q	D	I	P	W	T	Q	S	T	E	H	I	N	T	Q	K	R	E	N	G	Q	Q	T	L	R	L	E	H	P	N	S	T	Q	L	T	D	H	Y	Q	R	I	T
A/muscovy-duck/Vietnam/HN6698/2020	H4H5N6	2.3.4.4h	90	M	E	Q	E	Q	D	T	L	W	T	Q	S	T	E	H	T	N	T	Q	R	R	E	N	G	Q	Q	T	Q	R	P	E	H	P	N	S	T	Q	L	M	D	H	C	Q	K	T	T
A/muscovy-duck/Vietnam/HN6699/2020	H4H5N6	2.3.4.4h	90	M	E	Q	E	Q	D	I	P	W	T	Q	S	T	E	H	I	N	T	Q	K	R	E	N	G	Q	Q	T	L	R	L	E	H	P	N	S	T	Q	L	T	D	H	Y	Q	R	I	T
A/muscovy-duck/Vietnam/HN6811/2020	H5H6N6	2.3.4.4h	90	M	E	Q	E	Q	G	T	P	W	T	Q	S	T	E	H	I	N	T	Q	K	R	G	N	G	Q	Q	T	Q	R	P	E	H	P	N	L	I	Q	L	M	D	H	Y	L	R	T	T
A/muscovy-duck/Vietnam/HN6881/2021	H5N6	2.3.4.4h	11	M	E	Q	E	Q	D	T	P	W	T	Q
A/muscovy-duck/Vietnam/HN6884/2021	H5N6	2.3.4.4h	11	M	E	Q	E	Q	D	T	P	W	T	Q
A/muscovy-duck/Vietnam/HN6890/2021	H5N6	2.3.4.4h	11	M	E	Q	E	Q	D	T	P	W	T	Q
A/duck/Vietnam/HN6893/2021	H5N6	2.3.4.4h	11	M	E	Q	E	Q	D	T	P	W	T	Q
A/duck/Vietnam/HN6894/2021	H5N6	2.3.4.4h	11	M	E	Q	E	Q	D	T	P	W	T	Q
A/duck/Vietnam/HN6896/2021	H5N6	2.3.4.4h	11	M	E	Q	E	Q	D	T	P	W	T	Q
A/duck/Vietnam/HN6897/2021	H5N6	2.3.4.4h	11	M	E	Q	E	Q	D	T	P	W	T	Q
A/duck/Vietnam/HN6898/2021	H5N6	2.3.4.4h	11	M	E	Q	E	Q	D	T	P	W	T	Q
A/duck/Vietnam/QN6519/2020	H5N6	2.3.4.4h	11	M	E	Q	E	Q	G	T	P	W	T	Q
A/duck/Vietnam/QN6658/2020	H5N6	2.3.4.4h	90	M	E	Q	E	Q	D	I	P	W	T	Q	S	T	E	H	I	N	T	Q	K	R	E	N	G	Q	Q	T	L	R	L	E	H	P	N	S	T	Q	L	T	D	H	Y	Q	R	I	T
A/duck/Vietnam/QN6659/2020	H5N6	2.3.4.4h	90	M	E	Q	E	Q	D	I	P	W	T	Q	S	T	E	H	I	N	T	Q	K	R	E	N	G	Q	Q	T	L	R	L	E	H	P	N	S	T	Q	L	T	D	H	Y	Q	R	I	T
A/duck/Vietnam/QN6660/2020	H5N6	2.3.4.4h	90	M	E	Q	E	Q	D	I	P	W	T	Q	S	T	E	H	I	N	T	Q	K	R	E	N	G	Q	Q	T	L	R	L	E	H	P	N	S	T	Q	L	T	D	H	Y	Q	R	I	T
A/duck/Vietnam/QN6661/2020	H5N6	2.3.4.4h	90	M	E	Q	E	Q	D	I	P	W	T	Q	S	T	E	H	I	N	T	Q	K	R	E	N	G	Q	Q	T	L	R	L	E	H	P	N	S	T	Q	L	T	D	H	Y	Q	R	I	T
A/duck/Vietnam/QN6730/2020	H5N6	2.3.4.4h	90	M	E	Q	E	Q	D	I	P	W	T	Q	S	T	E	H	I	N	T	Q	K	R	E	N	G	Q	Q	T	L	R	L	E	H	P	N	S	T	Q	L	T	D	H	Y	Q	R	I	T
A/duck/Vietnam/QN6736/2020	H4H5N2N6	2.3.4.4h	90	M	E	Q	E	Q	D	I	P	W	T	Q	S	T	E	H	I	N	T	Q	K	R	E	N	G	Q	Q	T	L	R	L	G	H	P	N	S	T	Q	L	T	D	H	Y	Q	R	I	M
A/duck/Vietnam/QN6739/2020	H5N6	2.3.4.4h	90	M	E	Q	E	Q	D	I	P	W	T	Q	S	T	E	H	I	N	T	Q	K	R	E	N	G	Q	Q	T	L	R	L	E	H	P	N	S	T	Q	L	T	D	H	Y	Q	R	I	T
A/duck/Vietnam/QN6796/2020	H5N6	2.3.4.4h	90	M	E	Q	E	Q	D	I	P	W	T	Q	S	T	E	H	I	N	T	Q	K	R	E	N	G	Q	Q	T	L	R	L	E	H	P	N	S	T	Q	L	T	D	H	Y	Q	R	I	T
A/duck/Vietnam/QN6798/2020	H5N6	2.3.4.4h	90	M	E	Q	E	Q	D	I	P	W	T	Q	S	T	E	H	I	N	T	Q	K	R	E	N	G	Q	Q	T	L	R	L	E	H	P	N	S	T	Q	L	T	D	H	Y	Q	R	I	T
A/duck/Vietnam/QN6799/2020	H5N6	2.3.4.4h	90	M	E	Q	E	Q	D	I	P	W	T	Q	S	T	E	H	I	N	T	Q	K	R	E	N	G	Q	Q	T	L	R	L	E	H	P	N	S	T	Q	L	T	D	H	Y	Q	R	I	T
A/duck/Vietnam/QN6800/2020	H5N6	2.3.4.4h	90	M	E	Q	E	Q	D	I	P	W	T	Q	S	T	E	H	I	N	T	Q	K	R	E	N	G	Q	Q	T	L	R	L	E	H	P	N	S	T	Q	L	T	D	H	Y	Q	R	I	T
A/duck/Vietnam/QN6801/2020	H5N6	2.3.4.4h	90	M	E	Q	E	Q	D	I	P	W	T	Q	S	T	E	H	I	N	T	Q	K	R	E	N	G	Q	Q	T	L	R	L	E	H	P	N	S	T	Q	L	T	D	H	Y	Q	R	I	T
A/duck/Vietnam/QN6803/2020	H3H5N2N6	2.3.4.4h	90	M	E	Q	E	Q	D	T	P	W	T	Q	S	T	E	H	I	N	T	Q	K	R	G	N	G	Q	Q	T	Q	R	P	E	H	L	N	S	T	Q	L	M	D	H	Y	L	R	T	M
A/duck/Vietnam/QN6804/2020	H5N6	2.3.4.4h	90	M	E	Q	E	Q	D	I	P	W	T	Q	S	T	E	H	I	N	T	Q	K	R	E	N	G	Q	Q	T	L	R	L	E	H	P	N	S	T	Q	L	T	D	H	Y	Q	R	I	T
A/duck/Vietnam/QN6805/2020	H5N6	2.3.4.4h	90	M	E	Q	E	Q	D	I	P	W	T	Q	S	T	E	H	I	N	T	Q	K	R	E	N	G	Q	Q	T	L	R	L	E	H	P	N	S	T	Q	L	T	D	H	Y	Q	R	I	T
A/duck/Vietnam/QN6806/2020	H5N6	2.3.4.4h	90	M	E	Q	E	Q	D	I	P	W	T	Q	S	T	E	H	I	N	T	Q	K	R	E	N	G	Q	Q	T	L	R	L	E	H	P	N	S	T	Q	L	T	D	H	Y	Q	R	I	T
A/duck/Vietnam/QN6807/2020	H3H5N2N6N8	2.3.4.4h	90	M	E	Q	E	Q	D	T	P	W	T	Q	S	T	E	H	I	N	T	Q	K	R	G	N	G	Q	Q	T	Q	R	P	E	H	L	N	S	T	Q	L	M	D	H	Y	L	R	T	M
A/duck/Vietnam/QN6808/2020	H5N6	2.3.4.4h	90	M	E	Q	E	Q	D	I	P	W	T	Q	S	T	E	H	I	N	T	Q	K	R	E	N	G	Q	Q	T	L	R	L	E	H	P	N	S	T	Q	L	T	D	H	Y	Q	R	I	T
A/duck/Vietnam/QN6809/2020	H3H5N6	2.3.4.4h	90	M	E	Q	E	Q	D	I	P	W	T	Q	S	T	E	H	I	N	T	Q	K	R	E	N	G	Q	Q	T	L	R	L	E	H	P	N	S	T	Q	L	T	D	H	Y	Q	R	I	T
A/duck/Vietnam/HN5141/2018	H5N6	2.3.4.4g	90	M	E	R	E	Q	D	T	P	W	I	Q	S	T	E	H	I	N	T	Q	K	R	G	N	G	Q	Q	T	Q	R	L	E	H	L	N	S	I	Q	L	M	A	H	Y	P	K	T	M
A/duck/Vietnam/HN5142/2018	H5N6	2.3.4.4g	90	M	E	R	E	Q	D	T	P	W	I	Q	S	T	E	H	I	N	T	Q	K	R	G	N	G	Q	Q	T	Q	R	L	E	H	L	N	S	I	Q	L	M	A	H	Y	P	K	T	M
A/duck/Vietnam/HN5143/2018	H5N6	2.3.4.4g	90	M	E	R	E	Q	D	T	P	W	I	Q	S	T	E	H	I	N	T	Q	K	R	G	N	G	Q	Q	T	Q	R	L	E	H	L	N	S	I	Q	L	M	A	H	Y	P	K	T	M
A/duck/Vietnam/HN5144/2018	H5N6*	2.3.4.4g	90	M	E	R	E	Q	D	T	P	W	I	Q	S	T	E	H	I	N	T	Q	K	R	G	D	G	Q	Q	T	Q	R	L	E	H	L	N	S	I	Q	L	M	A	H	Y	P	K	T	M
A/duck/Vietnam/HN5145/2018	H5N6	2.3.4.4g	90	M	E	R	E	Q	D	T	P	W	I	Q	S	T	E	H	I	N	T	Q	K	R	G	N	G	Q	Q	T	Q	R	L	E	H	L	N	S	I	Q	L	M	A	H	Y	P	K	T	M
A/duck/Vietnam/HN5147/2018	H5N6	2.3.4.4g	90	M	E	R	E	Q	D	T	P	W	I	Q	S	T	E	H	I	N	T	Q	K	R	G	N	G	Q	Q	T	Q	R	L	E	H	L	N	S	I	Q	L	M	A	H	Y	P	K	T	M
A/duck/Vietnam/HN5148/2018	H5N6*	2.3.4.4g	90	M	E	R	E	Q	D	T	P	W	I	Q	S	T	E	H	I	N	T	Q	K	R	G	N	G	Q	Q	T	Q	R	L	E	H	L	N	S	I	Q	L	M	A	H	Y	P	K	T	M
A/duck/Vietnam/HN5149/2018	H5N6	2.3.4.4g	90	M	E	R	E	Q	D	T	P	W	I	Q	S	T	E	H	I	N	T	Q	K	R	G	D	G	Q	Q	T	Q	R	L	E	H	L	N	S	I	Q	L	M	A	H	Y	P	K	T	M
*Samples did not show 'mixed' HA sequences, but they did show 'mixed' N6 NA and mixed PB2, PB1, PA, and NS1 sequences.
[truncated: 44 more columns]

## Sheet: A_PA
Supplemental Table 2: Consensus sequences of viral proteins isolated in this study.
Virus	Subtype	Clade	Protein Length	1	2	3	4	5	6	7	8	9	10	11	12	13	14	15	16	17	18	19	20	21	22	23	24	25	26	27	28	29	30	31	32	33	34	35	36	37	38	39	40	41	42	43	44	45	46
A/muscovy-duck/Vietnam/HN4711/2018	H5N6	2.3.4.4h	716	M	E	D	F	V	R	Q	C	F	N	P	M	I	V	E	L	A	E	K	T	M	K	E	Y	G	E	S	P	K	I	E	T	N	K	F	A	A	I	C	T	H	L	E	V	C	F
A/muscovy-duck/Vietnam/HN4713/2018	H5N6	2.3.4.4h	716	M	E	D	F	V	R	Q	C	F	N	P	M	I	V	E	L	A	E	K	T	M	K	E	Y	G	E	S	P	K	I	E	T	N	K	F	A	A	I	C	T	H	L	E	V	C	F
A/muscovy-duck/Vietnam/HN4714/2018	H5N6	2.3.4.4h	716	M	E	D	F	V	R	Q	C	F	N	P	M	I	V	E	L	A	E	K	T	M	K	E	Y	G	E	S	P	K	I	E	T	N	K	F	A	A	I	C	T	H	L	E	V	C	F
A/muscovy-duck/Vietnam/HN4715/2018	H5N6	2.3.4.4h	716	M	E	D	F	V	R	Q	C	F	N	P	M	I	V	E	L	A	E	K	T	M	K	E	Y	G	E	S	P	K	I	E	T	N	K	F	A	A	I	C	T	H	L	E	V	C	F
A/muscovy-duck/Vietnam/HN4716/2018	H5N6	2.3.4.4h	716	M	E	D	F	V	R	Q	C	F	N	P	M	I	V	E	L	A	E	K	T	M	K	E	Y	G	E	S	P	K	I	E	T	N	K	F	A	A	I	C	T	H	L	E	V	C	F
A/muscovy-duck/Vietnam/HN4718/2018	H5N6	2.3.4.4h	716	M	E	D	F	V	R	Q	C	F	N	P	M	I	V	E	L	A	E	K	T	M	K	E	Y	G	E	S	P	K	I	E	T	N	K	F	A	A	I	C	T	H	L	E	V	C	F
A/muscovy-duck/Vietnam/HN4719/2018	H5N6	2.3.4.4h	716	M	E	D	F	V	R	Q	C	F	N	P	M	I	V	E	L	A	E	K	T	M	K	E	Y	G	E	S	P	K	I	E	T	N	K	F	A	A	I	C	T	H	L	E	V	C	F
A/muscovy-duck/Vietnam/HN4720/2018	H5N6	2.3.4.4h	716	M	E	D	F	V	R	Q	C	F	N	P	M	I	V	E	L	A	E	K	T	M	K	E	Y	G	E	S	P	K	I	E	T	N	K	F	A	A	I	C	T	H	L	E	V	C	F
A/duck/Vietnam/HN4721/2018	H5N6	2.3.4.4h	716	M	E	D	F	V	R	Q	C	F	N	P	M	I	V	E	L	A	E	K	T	M	K	E	Y	G	E	S	P	K	I	E	T	N	K	F	A	A	I	C	T	H	L	E	V	C	F
A/muscovy-duck/Vietnam/HN4856/2018	H5N6	2.3.4.4h	716	M	E	D	F	V	R	Q	C	F	N	P	M	I	V	E	L	A	E	K	T	M	K	E	Y	G	E	S	P	K	I	E	T	N	K	F	A	A	I	C	T	H	L	E	V	C	F
A/muscovy-duck/Vietnam/HN4857/2018	H5N6	2.3.4.4h	716	M	E	D	F	V	R	Q	C	F	N	P	M	I	V	E	L	A	E	K	T	M	K	E	Y	G	E	S	P	K	I	E	T	N	K	F	A	A	I	C	T	H	L	E	V	C	F
A/muscovy-duck/Vietnam/HN4858/2018	H5N6	2.3.4.4h	716	M	E	D	F	V	R	Q	C	F	N	P	M	I	V	E	L	A	E	K	T	M	K	E	Y	G	E	S	P	K	I	E	T	N	K	F	A	A	I	C	T	H	L	E	V	C	F
A/muscovy-duck/Vietnam/HN5046/2018	H5N6	2.3.4.4h	716	M	E	D	F	V	R	Q	C	F	N	P	M	I	V	E	L	A	E	K	T	M	K	E	Y	G	E	S	P	K	I	E	T	N	K	F	A	A	I	C	T	H	L	E	V	C	F
A/muscovy-duck/Vietnam/HN5047/2018	H5N6	2.3.4.4h	716	M	E	D	F	V	R	Q	C	F	N	P	M	I	V	E	L	A	E	K	T	M	K	E	Y	G	E	S	P	K	I	E	T	N	K	F	A	A	I	C	T	H	L	E	V	C	F
A/muscovy-duck/Vietnam/HN5048/2018	H5N6	2.3.4.4h	716	M	E	D	F	V	R	Q	C	F	N	P	M	I	V	E	L	A	E	K	T	M	K	E	Y	G	E	S	P	K	I	E	T	N	K	F	A	A	I	C	T	H	L	E	V	C	F
A/duck/Vietnam/HN5080/2018	H5N6	2.3.4.4h	716	M	E	D	F	V	R	Q	C	F	N	P	M	I	V	E	L	A	E	K	T	M	K	E	Y	G	E	S	P	K	I	E	T	N	K	F	A	A	I	C	T	H	L	E	V	C	F
A/muscovy-duck/Vietnam/HN5132/2018	H5N6	2.3.4.4h	716	M	E	D	F	V	R	Q	C	F	N	P	M	I	V	E	L	A	E	K	T	M	K	E	Y	G	E	S	P	K	I	E	T	N	K	F	A	A	I	C	T	H	L	E	V	C	F
A/muscovy-duck/Vietnam/HN5135/2018	H5N6	2.3.4.4h	716	M	E	D	F	V	R	Q	C	F	N	P	M	I	V	E	L	A	E	K	T	M	K	E	Y	G	E	S	P	K	I	E	T	N	K	F	A	A	I	C	T	H	L	E	V	C	F
A/muscovy-duck/Vietnam/HN5137/2018	H5N6	2.3.4.4h	716	M	E	D	F	V	R	Q	C	F	N	P	M	I	V	E	L	A	E	K	T	M	K	E	Y	G	E	S	P	K	I	E	T	N	K	F	A	A	I	C	T	H	L	E	V	C	F
A/muscovy-duck/Vietnam/HN5138/2018	H5N6	2.3.4.4h	716	M	E	D	F	V	R	Q	C	F	N	P	M	I	V	E	L	A	E	K	T	M	K	E	Y	G	E	S	P	K	I	E	T	N	K	F	A	A	I	C	T	H	L	E	V	C	F
A/muscovy-duck/Vietnam/HN5139/2018	H5N6	2.3.4.4h	716	M	E	D	F	V	R	Q	C	F	N	P	M	I	V	E	L	A	E	K	T	M	K	E	Y	G	E	S	P	K	I	E	T	N	K	F	A	A	I	C	T	H	L	E	V	C	F
A/muscovy-duck/Vietnam/HN5140/2018	H5H9N2N6	2.3.4.4h	716	M	E	D	F	V	R	Q	C	F	N	P	M	I	V	E	L	A	E	K	A	M	K	E	Y	G	E	D	P	K	I	E	T	N	K	F	A	S	I	C	T	H	L	E	V	C	F
A/muscovy-duck/Vietnam/HN5049/2018	H5N6	2.3.4.4h	716	M	E	D	F	V	R	Q	C	F	N	P	M	I	V	E	L	A	E	K	T	M	K	E	Y	G	E	S	P	K	I	E	T	N	K	F	A	A	I	C	T	H	L	E	V	C	F
A/duck/Vietnam/HN5150/2018	H5H6N6	2.3.4.4h	716	M	E	D	F	V	R	Q	C	F	N	P	M	I	V	E	L	A	E	K	A	M	K	E	Y	G	E	D	P	K	I	E	T	N	K	F	A	A	I	C	T	H	L	E	V	C	F
A/muscovy-duck/Vietnam/HN6029/2019	H5H6N6N8	2.3.4.4h	716	M	E	D	F	V	R	Q	C	F	N	P	M	I	V	E	L	A	E	K	A	M	K	E	Y	G	E	D	P	K	I	E	T	N	K	F	A	A	I	C	T	H	L	E	V	C	F
A/muscovy-duck/Vietnam/HN6111/2020	H5N6	2.3.4.4h	716	M	E	D	F	V	R	Q	C	F	N	P	M	I	V	E	L	A	E	K	A	M	K	E	Y	G	E	D	P	K	I	E	T	N	K	F	A	A	I	C	T	H	L	E	V	C	F
A/muscovy-duck/Vietnam/HN6113/2020	H5N6	2.3.4.4h	716	M	E	D	F	V	R	Q	C	F	N	P	M	I	V	E	L	A	E	K	A	M	K	E	Y	G	E	D	P	K	I	E	T	N	K	F	A	A	I	C	T	H	L	E	V	C	F
A/muscovy-duck/Vietnam/HN6114/2020	H5N6	2.3.4.4h	716	M	E	D	F	V	R	Q	C	F	N	P	M	I	V	E	L	A	E	K	A	M	K	E	Y	G	E	D	P	K	I	E	T	N	K	F	A	A	I	C	T	H	L	E	V	C	F
A/muscovy-duck/Vietnam/HN6115/2020	H5N6	2.3.4.4h	716	M	E	D	F	V	R	Q	C	F	N	P	M	I	V	E	L	A	E	K	A	M	K	E	Y	G	E	D	P	K	I	E	T	N	K	F	A	A	I	C	T	H	L	E	V	C	F
A/muscovy-duck/Vietnam/HN6119/2020	H5N6	2.3.4.4h	716	M	E	D	F	V	R	Q	C	F	N	P	M	I	V	E	L	A	E	K	A	M	K	E	Y	G	E	D	P	K	I	E	T	N	K	F	A	A	I	C	T	H	L	E	V	C	F
A/muscovy-duck/Vietnam/HN6120/2020	H5N6	2.3.4.4h	716	M	E	D	F	V	R	Q	C	F	N	P	M	I	V	E	L	A	E	K	A	M	K	E	Y	G	E	D	P	K	I	E	T	N	K	F	A	A	I	C	T	H	L	E	V	C	F
A/muscovy-duck/Vietnam/HN6606/2020	H5N6	2.3.4.4h	716	M	E	D	F	V	R	Q	C	F	N	P	M	I	V	E	L	A	E	K	T	M	K	E	Y	G	E	N	P	K	I	E	T	N	K	F	A	A	I	C	T	H	L	E	V	C	F
A/muscovy-duck/Vietnam/HN6607/2020	H5N6	2.3.4.4h	716	M	E	D	F	V	R	Q	C	F	N	P	M	I	V	E	L	A	E	K	T	M	K	E	Y	G	E	N	P	K	I	E	T	N	K	F	A	A	I	C	T	H	L	E	V	C	F
A/muscovy-duck/Vietnam/HN6608/2020	H5N6	2.3.4.4h	716	M	E	D	F	V	R	Q	C	F	N	P	M	I	V	E	L	A	E	K	T	M	K	E	Y	G	E	N	P	K	I	E	T	N	K	F	A	A	I	C	T	H	L	E	V	C	F
A/muscovy-duck/Vietnam/HN6609/2020	H5N6	2.3.4.4h	716	M	E	D	F	V	R	Q	C	F	N	P	M	I	V	E	L	A	E	K	T	M	K	E	Y	G	E	N	P	K	I	E	T	N	K	F	A	A	I	C	T	H	L	E	V	C	F
A/muscovy-duck/Vietnam/HN6610/2020	H5N6	2.3.4.4h	716	M	E	D	F	V	R	Q	C	F	N	P	M	I	V	E	L	A	E	K	T	M	K	E	Y	G	E	N	P	K	I	E	T	N	K	F	A	A	I	C	T	H	L	E	V	C	F
A/duck/Vietnam/HN6611/2020	H5N6	2.3.4.4h	716	M	E	D	F	V	R	Q	C	F	N	P	M	I	V	E	L	A	E	K	T	M	K	E	Y	G	E	N	P	K	I	E	T	N	K	F	A	A	I	C	T	H	L	E	V	C	F
A/muscovy-duck/Vietnam/HN6692/2020	H5N6	2.3.4.4h	716	M	E	D	F	V	R	Q	C	F	N	P	M	V	V	E	L	A	E	K	A	M	K	E	Y	G	E	D	P	K	I	E	T	N	K	F	A	A	I	C	T	H	L	E	V	C	F
A/muscovy-duck/Vietnam/HN6698/2020	H4H5N6	2.3.4.4h	716	M	E	D	F	V	R	Q	C	F	N	P	M	I	V	E	L	A	E	K	A	M	K	E	Y	G	E	D	P	K	I	E	T	N	K	F	A	A	I	C	T	H	L	E	V	C	F
A/muscovy-duck/Vietnam/HN6699/2020	H4H5N6	2.3.4.4h	716	M	E	D	F	V	R	Q	C	F	N	P	M	V	V	E	L	A	E	K	A	M	K	E	Y	G	E	D	P	K	I	E	T	N	K	F	A	A	I	C	T	H	L	E	V	C	F
A/muscovy-duck/Vietnam/HN6811/2020	H5H6N6	2.3.4.4h	716	M	E	D	F	V	R	Q	C	F	N	P	M	I	V	E	L	A	E	K	A	M	K	E	Y	G	E	D	P	K	I	E	T	N	K	F	A	A	I	C	T	H	L	E	V	C	F
A/muscovy-duck/Vietnam/HN6881/2021	H5N6	2.3.4.4h	716	M	E	D	F	V	R	Q	C	F	N	P	M	V	V	E	L	A	E	K	T	M	K	E	Y	G	E	N	P	K	I	E	T	N	K	F	A	A	I	C	T	H	L	E	V	C	F
A/muscovy-duck/Vietnam/HN6884/2021	H5N6	2.3.4.4h	716	M	E	D	F	V	R	Q	C	F	N	P	M	V	V	E	L	A	E	K	T	M	K	E	Y	G	E	N	P	K	I	E	T	N	K	F	A	A	I	C	T	H	L	E	V	C	F
A/muscovy-duck/Vietnam/HN6890/2021	H5N6	2.3.4.4h	716	M	E	D	F	V	R	Q	C	F	N	P	M	V	V	E	L	A	E	K	T	M	K	E	Y	G	E	N	P	K	I	E	T	N	K	F	A	A	I	C	T	H	L	E	V	C	F
A/duck/Vietnam/HN6893/2021	H5N6	2.3.4.4h	716	M	E	D	F	V	R	Q	C	F	N	P	M	I	V	E	L	A	E	K	T	M	K	E	Y	G	E	N	P	K	I	E	T	N	K	F	A	A	I	C	T	H	L	E	V	C	F
A/duck/Vietnam/HN6894/2021	H5N6	2.3.4.4h	716	M	E	D	F	V	R	Q	C	F	N	P	M	I	V	E	L	A	E	K	T	M	K	E	Y	G	E	N	P	K	I	E	T	N	K	F	A	A	I	C	T	H	L	E	V	C	F
A/duck/Vietnam/HN6896/2021	H5N6	2.3.4.4h	716	M	E	D	F	V	R	Q	C	F	N	P	M	V	V	E	L	A	E	K	T	M	K	E	Y	G	E	N	P	K	I	E	T	N	K	F	A	A	I	C	T	H	L	E	V	C	F
A/duck/Vietnam/HN6897/2021	H5N6	2.3.4.4h	716	M	E	D	F	V	R	Q	C	F	N	P	M	V	V	E	L	A	E	K	T	M	K	E	Y	G	E	N	P	K	I	E	T	N	K	F	A	A	I	C	T	H	L	E	V	C	F
A/duck/Vietnam/HN6898/2021	H5N6	2.3.4.4h	716	M	E	D	F	V	R	Q	C	F	N	P	M	V	V	E	L	A	E	K	T	M	K	E	Y	G	E	N	P	K	I	E	T	N	K	F	A	A	I	C	T	H	L	E	V	C	F
A/duck/Vietnam/QN6519/2020	H5N6	2.3.4.4h	716	M	E	D	F	V	R	Q	C	F	N	P	M	I	V	E	L	A	E	K	A	M	K	E	Y	G	E	D	P	K	I	E	T	N	K	F	A	A	I	C	T	H	L	E	V	C	F
A/duck/Vietnam/QN6658/2020	H5N6	2.3.4.4h	716	M	E	D	F	V	R	Q	C	F	N	P	M	V	V	E	L	A	E	K	A	M	K	E	Y	G	E	D	P	K	I	E	T	N	K	F	A	A	I	C	T	H	L	E	V	C	F
A/duck/Vietnam/QN6659/2020	H5N6	2.3.4.4h	716	M	E	D	F	V	R	Q	C	F	N	P	M	V	V	E	L	A	E	K	A	M	K	E	Y	G	E	D	P	K	I	E	T	N	K	F	A	A	I	C	T	H	L	E	V	C	F
A/duck/Vietnam/QN6660/2020	H5N6	2.3.4.4h	716	M	E	D	F	V	R	Q	C	F	N	P	M	V	V	E	L	A	E	K	A	M	K	E	Y	G	E	D	P	K	I	E	T	N	K	F	A	A	I	C	T	H	L	E	V	C	F
A/duck/Vietnam/QN6661/2020	H5N6	2.3.4.4h	716	M	E	D	F	V	R	Q	C	F	N	P	M	V	V	E	L	A	E	K	A	M	K	E	Y	G	E	D	P	K	I	E	T	N	K	F	A	A	I	C	T	H	L	E	V	C	F
A/duck/Vietnam/QN6730/2020	H5N6	2.3.4.4h	716	M	E	D	F	V	R	Q	C	F	N	P	M	V	V	E	L	A	E	K	A	M	K	E	Y	G	E	D	P	K	I	E	T	N	K	F	A	A	I	C	T	H	L	E	V	C	F
A/duck/Vietnam/QN6736/2020	H4H5N2N6	2.3.4.4h	716	M	E	D	F	V	R	Q	C	F	N	P	M	I	V	E	L	A	E	K	A	M	K	E	Y	G	E	D	P	K	I	E	T	N	K	F	A	A	I	C	T	H	L	E	V	C	F
A/duck/Vietnam/QN6739/2020	H5N6	2.3.4.4h	716	M	E	D	F	V	R	Q	C	F	N	P	M	V	V	E	L	A	E	K	A	M	K	E	Y	G	E	D	P	K	I	E	T	N	K	F	A	A	I	C	T	H	L	E	V	C	F
A/duck/Vietnam/QN6796/2020	H5N6	2.3.4.4h	716	M	E	D	F	V	R	Q	C	F	N	P	M	V	V	E	L	A	E	K	A	M	K	E	Y	G	E	D	P	K	I	E	T	N	K	F	A	A	I	C	T	H	L	E	V	C	F
A/duck/Vietnam/QN6798/2020	H5N6	2.3.4.4h	716	M	E	D	F	V	R	Q	C	F	N	P	M	V	V	E	L	A	E	K	A	M	K	E	Y	G	E	D	P	K	I	E	T	N	K	F	A	A	I	C	T	H	L	E	V	C	F
A/duck/Vietnam/QN6799/2020	H5N6	2.3.4.4h	716	M	E	D	F	V	R	Q	C	F	N	P	M	V	V	E	L	A	E	K	A	M	K	E	Y	G	E	D	P	K	I	E	T	N	K	F	A	A	I	C	T	H	L	E	V	C	F
A/duck/Vietnam/QN6800/2020	H5N6	2.3.4.4h	716	M	E	D	F	V	R	Q	C	F	N	P	M	V	V	E	L	A	E	K	A	M	K	E	Y	G	E	D	P	K	I	E	T	N	K	F	A	A	I	C	T	H	L	E	V	C	F
A/duck/Vietnam/QN6801/2020	H5N6	2.3.4.4h	716	M	E	D	F	V	R	Q	C	F	N	P	M	V	V	E	L	A	E	K	A	M	K	E	Y	G	E	D	P	K	I	E	T	N	K	F	A	A	I	C	T	H	L	E	V	C	F
A/duck/Vietnam/QN6803/2020	H3H5N2N6	2.3.4.4h	716	M	E	D	F	V	R	Q	C	F	N	P	M	I	V	E	L	A	E	K	A	M	K	E	Y	G	E	D	P	K	I	E	T	N	K	F	A	A	I	C	T	H	L	E	V	C	F
A/duck/Vietnam/QN6804/2020	H5N6	2.3.4.4h	716	M	E	D	F	V	R	Q	C	F	N	P	M	V	V	E	L	A	E	K	A	M	K	E	Y	G	E	D	P	K	I	E	T	N	K	F	A	A	I	C	T	H	L	E	V	C	F
A/duck/Vietnam/QN6805/2020	H5N6	2.3.4.4h	716	M	E	D	F	V	R	Q	C	F	N	P	M	V	V	E	L	A	E	K	A	M	K	E	Y	G	E	D	P	K	I	E	T	N	K	F	A	A	I	C	T	H	L	E	V	C	F
A/duck/Vietnam/QN6806/2020	H5N6	2.3.4.4h	716	M	E	D	F	V	R	Q	C	F	N	P	M	V	V	E	L	A	E	K	A	M	K	E	Y	G	E	D	P	K	I	E	T	N	K	F	A	A	I	C	T	H	L	E	V	C	F
A/duck/Vietnam/QN6807/2020	H3H5N2N6N8	2.3.4.4h	716	M	E	D	F	V	R	Q	C	F	N	P	M	I	V	E	L	A	E	K	A	M	K	E	Y	G	E	D	P	K	I	E	T	N	K	F	A	A	I	C	T	H	L	E	V	C	F
A/duck/Vietnam/QN6808/2020	H5N6	2.3.4.4h	716	M	E	D	F	V	R	Q	C	F	N	P	M	V	V	E	L	A	E	K	A	M	K	E	Y	G	E	D	P	K	I	E	T	N	K	F	A	A	I	C	T	H	L	E	V	C	F
A/duck/Vietnam/QN6809/2020	H3H5N6	2.3.4.4h	716	M	E	D	F	V	R	Q	C	F	N	P	M	V	V	E	L	A	E	K	A	M	K	E	Y	G	E	D	P	K	I	E	T	N	K	F	A	A	I	C	T	H	L	E	V	C	F
A/duck/Vietnam/HN5141/2018	H5N6	2.3.4.4g	716	M	E	D	F	V	R	Q	C	F	N	P	M	I	V	E	L	A	E	K	T	M	K	E	Y	G	E	S	P	K	I	E	T	N	K	F	A	A	I	C	T	H	L	E	V	C	F
A/duck/Vietnam/HN5142/2018	H5N6	2.3.4.4g	716	M	E	D	F	V	R	Q	C	F	N	P	M	I	V	E	L	A	E	K	T	M	K	E	Y	G	E	S	P	K	I	E	T	N	K	F	A	A	I	C	T	H	L	E	V	C	F
A/duck/Vietnam/HN5143/2018	H5N6	2.3.4.4g	716	M	E	D	F	V	R	Q	C	F	N	P	M	I	V	E	L	A	E	K	T	M	K	E	Y	G	E	S	P	K	I	E	T	N	K	F	A	A	I	C	T	H	L	E	V	C	F
A/duck/Vietnam/HN5144/2018	H5N6*	2.3.4.4g	716	M	E	D	F	V	R	Q	C	F	N	P	M	I	V	E	L	A	E	K	T	M	K	E	Y	G	E	S	P	K	I	E	T	N	K	F	A	A	I	C	T	H	L	E	V	C	F
A/duck/Vietnam/HN5145/2018	H5N6	2.3.4.4g	716	M	E	D	F	V	R	Q	C	F	N	P	M	I	V	E	L	A	E	K	T	M	K	E	Y	G	E	S	P	K	I	E	T	N	K	F	A	A	I	C	T	H	L	E	V	C	F
A/duck/Vietnam/HN5147/2018	H5N6	2.3.4.4g	716	M	E	D	F	V	R	Q	C	F	N	P	M	I	V	E	L	A	E	K	T	M	K	E	Y	G	E	S	P	K	I	E	T	N	K	F	A	A	I	C	T	H	L	E	V	C	F
A/duck/Vietnam/HN5148/2018	H5N6*	2.3.4.4g	716	M	E	D	F	V	R	Q	C	F	N	P	M	I	V	E	L	A	E	K	T	M	K	E	Y	G	E	S	P	K	I	E	T	N	K	F	A	A	I	C	T	H	L	E	V	C	F
A/duck/Vietnam/HN5149/2018	H5N6	2.3.4.4g	716	M	E	D	F	V	R	Q	C	F	N	P	M	I	V	E	L	A	E	K	T	M	K	E	Y	G	E	S	P	K	I	E	T	N	K	F	A	A	I	C	T	H	L	E	V	C	F
*Samples did not show 'mixed' HA sequences, but they did show 'mixed' N6 NA and mixed PB2, PB1, PA, and NS1 sequences.
[truncated: 670 more columns]

## Sheet: A_PA-X
Supplemental Table 2: Consensus sequences of viral proteins isolated in this study.
Virus	Subtype	Clade	Protein Length	1	2	3	4	5	6	7	8	9	10	11	12	13	14	15	16	17	18	19	20	21	22	23	24	25	26	27	28	29	30	31	32	33	34	35	36	37	38	39	40	41	42	43	44	45	46
A/muscovy-duck/Vietnam/HN4711/2018	H5N6	2.3.4.4h	252	M	E	D	F	V	R	Q	C	F	N	P	M	I	V	E	L	A	E	K	T	M	K	E	Y	G	E	S	P	K	I	E	T	N	K	F	A	A	I	C	T	H	L	E	V	C	F
A/muscovy-duck/Vietnam/HN4713/2018	H5N6	2.3.4.4h	252	M	E	D	F	V	R	Q	C	F	N	P	M	I	V	E	L	A	E	K	T	M	K	E	Y	G	E	S	P	K	I	E	T	N	K	F	A	A	I	C	T	H	L	E	V	C	F
A/muscovy-duck/Vietnam/HN4714/2018	H5N6	2.3.4.4h	252	M	E	D	F	V	R	Q	C	F	N	P	M	I	V	E	L	A	E	K	T	M	K	E	Y	G	E	S	P	K	I	E	T	N	K	F	A	A	I	C	T	H	L	E	V	C	F
A/muscovy-duck/Vietnam/HN4715/2018	H5N6	2.3.4.4h	252	M	E	D	F	V	R	Q	C	F	N	P	M	I	V	E	L	A	E	K	T	M	K	E	Y	G	E	S	P	K	I	E	T	N	K	F	A	A	I	C	T	H	L	E	V	C	F
A/muscovy-duck/Vietnam/HN4716/2018	H5N6	2.3.4.4h	252	M	E	D	F	V	R	Q	C	F	N	P	M	I	V	E	L	A	E	K	T	M	K	E	Y	G	E	S	P	K	I	E	T	N	K	F	A	A	I	C	T	H	L	E	V	C	F
A/muscovy-duck/Vietnam/HN4718/2018	H5N6	2.3.4.4h	252	M	E	D	F	V	R	Q	C	F	N	P	M	I	V	E	L	A	E	K	T	M	K	E	Y	G	E	S	P	K	I	E	T	N	K	F	A	A	I	C	T	H	L	E	V	C	F
A/muscovy-duck/Vietnam/HN4719/2018	H5N6	2.3.4.4h	252	M	E	D	F	V	R	Q	C	F	N	P	M	I	V	E	L	A	E	K	T	M	K	E	Y	G	E	S	P	K	I	E	T	N	K	F	A	A	I	C	T	H	L	E	V	C	F
A/muscovy-duck/Vietnam/HN4720/2018	H5N6	2.3.4.4h	252	M	E	D	F	V	R	Q	C	F	N	P	M	I	V	E	L	A	E	K	T	M	K	E	Y	G	E	S	P	K	I	E	T	N	K	F	A	A	I	C	T	H	L	E	V	C	F
A/duck/Vietnam/HN4721/2018	H5N6	2.3.4.4h	252	M	E	D	F	V	R	Q	C	F	N	P	M	I	V	E	L	A	E	K	T	M	K	E	Y	G	E	S	P	K	I	E	T	N	K	F	A	A	I	C	T	H	L	E	V	C	F
A/muscovy-duck/Vietnam/HN4856/2018	H5N6	2.3.4.4h	252	M	E	D	F	V	R	Q	C	F	N	P	M	I	V	E	L	A	E	K	T	M	K	E	Y	G	E	S	P	K	I	E	T	N	K	F	A	A	I	C	T	H	L	E	V	C	F
A/muscovy-duck/Vietnam/HN4857/2018	H5N6	2.3.4.4h	252	M	E	D	F	V	R	Q	C	F	N	P	M	I	V	E	L	A	E	K	T	M	K	E	Y	G	E	S	P	K	I	E	T	N	K	F	A	A	I	C	T	H	L	E	V	C	F
A/muscovy-duck/Vietnam/HN4858/2018	H5N6	2.3.4.4h	252	M	E	D	F	V	R	Q	C	F	N	P	M	I	V	E	L	A	E	K	T	M	K	E	Y	G	E	S	P	K	I	E	T	N	K	F	A	A	I	C	T	H	L	E	V	C	F
A/muscovy-duck/Vietnam/HN5046/2018	H5N6	2.3.4.4h	252	M	E	D	F	V	R	Q	C	F	N	P	M	I	V	E	L	A	E	K	T	M	K	E	Y	G	E	S	P	K	I	E	T	N	K	F	A	A	I	C	T	H	L	E	V	C	F
A/muscovy-duck/Vietnam/HN5047/2018	H5N6	2.3.4.4h	252	M	E	D	F	V	R	Q	C	F	N	P	M	I	V	E	L	A	E	K	T	M	K	E	Y	G	E	S	P	K	I	E	T	N	K	F	A	A	I	C	T	H	L	E	V	C	F
A/muscovy-duck/Vietnam/HN5048/2018	H5N6	2.3.4.4h	252	M	E	D	F	V	R	Q	C	F	N	P	M	I	V	E	L	A	E	K	T	M	K	E	Y	G	E	S	P	K	I	E	T	N	K	F	A	A	I	C	T	H	L	E	V	C	F
A/duck/Vietnam/HN5080/2018	H5N6	2.3.4.4h	252	M	E	D	F	V	R	Q	C	F	N	P	M	I	V	E	L	A	E	K	T	M	K	E	Y	G	E	S	P	K	I	E	T	N	K	F	A	A	I	C	T	H	L	E	V	C	F
A/muscovy-duck/Vietnam/HN5132/2018	H5N6	2.3.4.4h	252	M	E	D	F	V	R	Q	C	F	N	P	M	I	V	E	L	A	E	K	T	M	K	E	Y	G	E	S	P	K	I	E	T	N	K	F	A	A	I	C	T	H	L	E	V	C	F
A/muscovy-duck/Vietnam/HN5135/2018	H5N6	2.3.4.4h	252	M	E	D	F	V	R	Q	C	F	N	P	M	I	V	E	L	A	E	K	T	M	K	E	Y	G	E	S	P	K	I	E	T	N	K	F	A	A	I	C	T	H	L	E	V	C	F
A/muscovy-duck/Vietnam/HN5137/2018	H5N6	2.3.4.4h	252	M	E	D	F	V	R	Q	C	F	N	P	M	I	V	E	L	A	E	K	T	M	K	E	Y	G	E	S	P	K	I	E	T	N	K	F	A	A	I	C	T	H	L	E	V	C	F
A/muscovy-duck/Vietnam/HN5138/2018	H5N6	2.3.4.4h	252	M	E	D	F	V	R	Q	C	F	N	P	M	I	V	E	L	A	E	K	T	M	K	E	Y	G	E	S	P	K	I	E	T	N	K	F	A	A	I	C	T	H	L	E	V	C	F
A/muscovy-duck/Vietnam/HN5139/2018	H5N6	2.3.4.4h	252	M	E	D	F	V	R	Q	C	F	N	P	M	I	V	E	L	A	E	K	T	M	K	E	Y	G	E	S	P	K	I	E	T	N	K	F	A	A	I	C	T	H	L	E	V	C	F
A/muscovy-duck/Vietnam/HN5140/2018	H5H9N2N6	2.3.4.4h	252	M	E	D	F	V	R	Q	C	F	N	P	M	I	V	E	L	A	E	K	A	M	K	E	Y	G	E	D	P	K	I	E	T	N	K	F	A	S	I	C	T	H	L	E	V	C	F
A/muscovy-duck/Vietnam/HN5049/2018	H5N6	2.3.4.4h	252	M	E	D	F	V	R	Q	C	F	N	P	M	I	V	E	L	A	E	K	T	M	K	E	Y	G	E	S	P	K	I	E	T	N	K	F	A	A	I	C	T	H	L	E	V	C	F
A/duck/Vietnam/HN5150/2018	H5H6N6	2.3.4.4h	252	M	E	D	F	V	R	Q	C	F	N	P	M	I	V	E	L	A	E	K	A	M	K	E	Y	G	E	D	P	K	I	E	T	N	K	F	A	A	I	C	T	H	L	E	V	C	F
A/muscovy-duck/Vietnam/HN6029/2019	H5H6N6N8	2.3.4.4h	252	M	E	D	F	V	R	Q	C	F	N	P	M	I	V	E	L	A	E	K	A	M	K	E	Y	G	E	D	P	K	I	E	T	N	K	F	A	A	I	C	T	H	L	E	V	C	F
A/muscovy-duck/Vietnam/HN6111/2020	H5N6	2.3.4.4h	252	M	E	D	F	V	R	Q	C	F	N	P	M	I	V	E	L	A	E	K	A	M	K	E	Y	G	E	D	P	K	I	E	T	N	K	F	A	A	I	C	T	H	L	E	V	C	F
A/muscovy-duck/Vietnam/HN6113/2020	H5N6	2.3.4.4h	252	M	E	D	F	V	R	Q	C	F	N	P	M	I	V	E	L	A	E	K	A	M	K	E	Y	G	E	D	P	K	I	E	T	N	K	F	A	A	I	C	T	H	L	E	V	C	F
A/muscovy-duck/Vietnam/HN6114/2020	H5N6	2.3.4.4h	252	M	E	D	F	V	R	Q	C	F	N	P	M	I	V	E	L	A	E	K	A	M	K	E	Y	G	E	D	P	K	I	E	T	N	K	F	A	A	I	C	T	H	L	E	V	C	F
A/muscovy-duck/Vietnam/HN6115/2020	H5N6	2.3.4.4h	252	M	E	D	F	V	R	Q	C	F	N	P	M	I	V	E	L	A	E	K	A	M	K	E	Y	G	E	D	P	K	I	E	T	N	K	F	A	A	I	C	T	H	L	E	V	C	F
A/muscovy-duck/Vietnam/HN6119/2020	H5N6	2.3.4.4h	252	M	E	D	F	V	R	Q	C	F	N	P	M	I	V	E	L	A	E	K	A	M	K	E	Y	G	E	D	P	K	I	E	T	N	K	F	A	A	I	C	T	H	L	E	V	C	F
A/muscovy-duck/Vietnam/HN6120/2020	H5N6	2.3.4.4h	252	M	E	D	F	V	R	Q	C	F	N	P	M	I	V	E	L	A	E	K	A	M	K	E	Y	G	E	D	P	K	I	E	T	N	K	F	A	A	I	C	T	H	L	E	V	C	F
A/muscovy-duck/Vietnam/HN6606/2020	H5N6	2.3.4.4h	252	M	E	D	F	V	R	Q	C	F	N	P	M	I	V	E	L	A	E	K	T	M	K	E	Y	G	E	N	P	K	I	E	T	N	K	F	A	A	I	C	T	H	L	E	V	C	F
A/muscovy-duck/Vietnam/HN6607/2020	H5N6	2.3.4.4h	252	M	E	D	F	V	R	Q	C	F	N	P	M	I	V	E	L	A	E	K	T	M	K	E	Y	G	E	N	P	K	I	E	T	N	K	F	A	A	I	C	T	H	L	E	V	C	F
A/muscovy-duck/Vietnam/HN6608/2020	H5N6	2.3.4.4h	252	M	E	D	F	V	R	Q	C	F	N	P	M	I	V	E	L	A	E	K	T	M	K	E	Y	G	E	N	P	K	I	E	T	N	K	F	A	A	I	C	T	H	L	E	V	C	F
A/muscovy-duck/Vietnam/HN6609/2020	H5N6	2.3.4.4h	252	M	E	D	F	V	R	Q	C	F	N	P	M	I	V	E	L	A	E	K	T	M	K	E	Y	G	E	N	P	K	I	E	T	N	K	F	A	A	I	C	T	H	L	E	V	C	F
A/muscovy-duck/Vietnam/HN6610/2020	H5N6	2.3.4.4h	252	M	E	D	F	V	R	Q	C	F	N	P	M	I	V	E	L	A	E	K	T	M	K	E	Y	G	E	N	P	K	I	E	T	N	K	F	A	A	I	C	T	H	L	E	V	C	F
A/duck/Vietnam/HN6611/2020	H5N6	2.3.4.4h	252	M	E	D	F	V	R	Q	C	F	N	P	M	I	V	E	L	A	E	K	T	M	K	E	Y	G	E	N	P	K	I	E	T	N	K	F	A	A	I	C	T	H	L	E	V	C	F
A/muscovy-duck/Vietnam/HN6692/2020	H5N6	2.3.4.4h	252	M	E	D	F	V	R	Q	C	F	N	P	M	V	V	E	L	A	E	K	A	M	K	E	Y	G	E	D	P	K	I	E	T	N	K	F	A	A	I	C	T	H	L	E	V	C	F
A/muscovy-duck/Vietnam/HN6698/2020	H4H5N6	2.3.4.4h	252	M	E	D	F	V	R	Q	C	F	N	P	M	I	V	E	L	A	E	K	A	M	K	E	Y	G	E	D	P	K	I	E	T	N	K	F	A	A	I	C	T	H	L	E	V	C	F
A/muscovy-duck/Vietnam/HN6699/2020	H4H5N6	2.3.4.4h	252	M	E	D	F	V	R	Q	C	F	N	P	M	V	V	E	L	A	E	K	A	M	K	E	Y	G	E	D	P	K	I	E	T	N	K	F	A	A	I	C	T	H	L	E	V	C	F
A/muscovy-duck/Vietnam/HN6811/2020	H5H6N6	2.3.4.4h	252	M	E	D	F	V	R	Q	C	F	N	P	M	I	V	E	L	A	E	K	A	M	K	E	Y	G	E	D	P	K	I	E	T	N	K	F	A	A	I	C	T	H	L	E	V	C	F
A/muscovy-duck/Vietnam/HN6881/2021	H5N6	2.3.4.4h	252	M	E	D	F	V	R	Q	C	F	N	P	M	V	V	E	L	A	E	K	T	M	K	E	Y	G	E	N	P	K	I	E	T	N	K	F	A	A	I	C	T	H	L	E	V	C	F
A/muscovy-duck/Vietnam/HN6884/2021	H5N6	2.3.4.4h	252	M	E	D	F	V	R	Q	C	F	N	P	M	V	V	E	L	A	E	K	T	M	K	E	Y	G	E	N	P	K	I	E	T	N	K	F	A	A	I	C	T	H	L	E	V	C	F
A/muscovy-duck/Vietnam/HN6890/2021	H5N6	2.3.4.4h	252	M	E	D	F	V	R	Q	C	F	N	P	M	V	V	E	L	A	E	K	T	M	K	E	Y	G	E	N	P	K	I	E	T	N	K	F	A	A	I	C	T	H	L	E	V	C	F
A/duck/Vietnam/HN6893/2021	H5N6	2.3.4.4h	252	M	E	D	F	V	R	Q	C	F	N	P	M	I	V	E	L	A	E	K	T	M	K	E	Y	G	E	N	P	K	I	E	T	N	K	F	A	A	I	C	T	H	L	E	V	C	F
A/duck/Vietnam/HN6894/2021	H5N6	2.3.4.4h	252	M	E	D	F	V	R	Q	C	F	N	P	M	I	V	E	L	A	E	K	T	M	K	E	Y	G	E	N	P	K	I	E	T	N	K	F	A	A	I	C	T	H	L	E	V	C	F
A/duck/Vietnam/HN6896/2021	H5N6	2.3.4.4h	252	M	E	D	F	V	R	Q	C	F	N	P	M	V	V	E	L	A	E	K	T	M	K	E	Y	G	E	N	P	K	I	E	T	N	K	F	A	A	I	C	T	H	L	E	V	C	F
A/duck/Vietnam/HN6897/2021	H5N6	2.3.4.4h	252	M	E	D	F	V	R	Q	C	F	N	P	M	V	V	E	L	A	E	K	T	M	K	E	Y	G	E	N	P	K	I	E	T	N	K	F	A	A	I	C	T	H	L	E	V	C	F
A/duck/Vietnam/HN6898/2021	H5N6	2.3.4.4h	252	M	E	D	F	V	R	Q	C	F	N	P	M	V	V	E	L	A	E	K	T	M	K	E	Y	G	E	N	P	K	I	E	T	N	K	F	A	A	I	C	T	H	L	E	V	C	F
A/duck/Vietnam/QN6519/2020	H5N6	2.3.4.4h	252	M	E	D	F	V	R	Q	C	F	N	P	M	I	V	E	L	A	E	K	A	M	K	E	Y	G	E	D	P	K	I	E	T	N	K	F	A	A	I	C	T	H	L	E	V	C	F
A/duck/Vietnam/QN6658/2020	H5N6	2.3.4.4h	252	M	E	D	F	V	R	Q	C	F	N	P	M	V	V	E	L	A	E	K	A	M	K	E	Y	G	E	D	P	K	I	E	T	N	K	F	A	A	I	C	T	H	L	E	V	C	F
A/duck/Vietnam/QN6659/2020	H5N6	2.3.4.4h	252	M	E	D	F	V	R	Q	C	F	N	P	M	V	V	E	L	A	E	K	A	M	K	E	Y	G	E	D	P	K	I	E	T	N	K	F	A	A	I	C	T	H	L	E	V	C	F
A/duck/Vietnam/QN6660/2020	H5N6	2.3.4.4h	252	M	E	D	F	V	R	Q	C	F	N	P	M	V	V	E	L	A	E	K	A	M	K	E	Y	G	E	D	P	K	I	E	T	N	K	F	A	A	I	C	T	H	L	E	V	C	F
A/duck/Vietnam/QN6661/2020	H5N6	2.3.4.4h	252	M	E	D	F	V	R	Q	C	F	N	P	M	V	V	E	L	A	E	K	A	M	K	E	Y	G	E	D	P	K	I	E	T	N	K	F	A	A	I	C	T	H	L	E	V	C	F
A/duck/Vietnam/QN6730/2020	H5N6	2.3.4.4h	252	M	E	D	F	V	R	Q	C	F	N	P	M	V	V	E	L	A	E	K	A	M	K	E	Y	G	E	D	P	K	I	E	T	N	K	F	A	A	I	C	T	H	L	E	V	C	F
A/duck/Vietnam/QN6736/2020	H4H5N2N6	2.3.4.4h	252	M	E	D	F	V	R	Q	C	F	N	P	M	I	V	E	L	A	E	K	A	M	K	E	Y	G	E	D	P	K	I	E	T	N	K	F	A	A	I	C	T	H	L	E	V	C	F
A/duck/Vietnam/QN6739/2020	H5N6	2.3.4.4h	252	M	E	D	F	V	R	Q	C	F	N	P	M	V	V	E	L	A	E	K	A	M	K	E	Y	G	E	D	P	K	I	E	T	N	K	F	A	A	I	C	T	H	L	E	V	C	F
A/duck/Vietnam/QN6796/2020	H5N6	2.3.4.4h	252	M	E	D	F	V	R	Q	C	F	N	P	M	V	V	E	L	A	E	K	A	M	K	E	Y	G	E	D	P	K	I	E	T	N	K	F	A	A	I	C	T	H	L	E	V	C	F
A/duck/Vietnam/QN6798/2020	H5N6	2.3.4.4h	252	M	E	D	F	V	R	Q	C	F	N	P	M	V	V	E	L	A	E	K	A	M	K	E	Y	G	E	D	P	K	I	E	T	N	K	F	A	A	I	C	T	H	L	E	V	C	F
A/duck/Vietnam/QN6799/2020	H5N6	2.3.4.4h	252	M	E	D	F	V	R	Q	C	F	N	P	M	V	V	E	L	A	E	K	A	M	K	E	Y	G	E	D	P	K	I	E	T	N	K	F	A	A	I	C	T	H	L	E	V	C	F
A/duck/Vietnam/QN6800/2020	H5N6	2.3.4.4h	252	M	E	D	F	V	R	Q	C	F	N	P	M	V	V	E	L	A	E	K	A	M	K	E	Y	G	E	D	P	K	I	E	T	N	K	F	A	A	I	C	T	H	L	E	V	C	F
A/duck/Vietnam/QN6801/2020	H5N6	2.3.4.4h	252	M	E	D	F	V	R	Q	C	F	N	P	M	V	V	E	L	A	E	K	A	M	K	E	Y	G	E	D	P	K	I	E	T	N	K	F	A	A	I	C	T	H	L	E	V	C	F
A/duck/Vietnam/QN6803/2020	H3H5N2N6	2.3.4.4h	252	M	E	D	F	V	R	Q	C	F	N	P	M	I	V	E	L	A	E	K	A	M	K	E	Y	G	E	D	P	K	I	E	T	N	K	F	A	A	I	C	T	H	L	E	V	C	F
A/duck/Vietnam/QN6804/2020	H5N6	2.3.4.4h	252	M	E	D	F	V	R	Q	C	F	N	P	M	V	V	E	L	A	E	K	A	M	K	E	Y	G	E	D	P	K	I	E	T	N	K	F	A	A	I	C	T	H	L	E	V	C	F
A/duck/Vietnam/QN6805/2020	H5N6	2.3.4.4h	252	M	E	D	F	V	R	Q	C	F	N	P	M	V	V	E	L	A	E	K	A	M	K	E	Y	G	E	D	P	K	I	E	T	N	K	F	A	A	I	C	T	H	L	E	V	C	F
A/duck/Vietnam/QN6806/2020	H5N6	2.3.4.4h	252	M	E	D	F	V	R	Q	C	F	N	P	M	V	V	E	L	A	E	K	A	M	K	E	Y	G	E	D	P	K	I	E	T	N	K	F	A	A	I	C	T	H	L	E	V	C	F
A/duck/Vietnam/QN6807/2020	H3H5N2N6N8	2.3.4.4h	252	M	E	D	F	V	R	Q	C	F	N	P	M	I	V	E	L	A	E	K	A	M	K	E	Y	G	E	D	P	K	I	E	T	N	K	F	A	A	I	C	T	H	L	E	V	C	F
A/duck/Vietnam/QN6808/2020	H5N6	2.3.4.4h	252	M	E	D	F	V	R	Q	C	F	N	P	M	V	V	E	L	A	E	K	A	M	K	E	Y	G	E	D	P	K	I	E	T	N	K	F	A	A	I	C	T	H	L	E	V	C	F
A/duck/Vietnam/QN6809/2020	H3H5N6	2.3.4.4h	252	M	E	D	F	V	R	Q	C	F	N	P	M	V	V	E	L	A	E	K	A	M	K	E	Y	G	E	D	P	K	I	E	T	N	K	F	A	A	I	C	T	H	L	E	V	C	F
A/duck/Vietnam/HN5141/2018	H5N6	2.3.4.4g	252	M	E	D	F	V	R	Q	C	F	N	P	M	I	V	E	L	A	E	K	T	M	K	E	Y	G	E	S	P	K	I	E	T	N	K	F	A	A	I	C	T	H	L	E	V	C	F
A/duck/Vietnam/HN5142/2018	H5N6	2.3.4.4g	252	M	E	D	F	V	R	Q	C	F	N	P	M	I	V	E	L	A	E	K	T	M	K	E	Y	G	E	S	P	K	I	E	T	N	K	F	A	A	I	C	T	H	L	E	V	C	F
A/duck/Vietnam/HN5143/2018	H5N6	2.3.4.4g	252	M	E	D	F	V	R	Q	C	F	N	P	M	I	V	E	L	A	E	K	T	M	K	E	Y	G	E	S	P	K	I	E	T	N	K	F	A	A	I	C	T	H	L	E	V	C	F
A/duck/Vietnam/HN5144/2018	H5N6*	2.3.4.4g	252	M	E	D	F	V	R	Q	C	F	N	P	M	I	V	E	L	A	E	K	T	M	K	E	Y	G	E	S	P	K	I	E	T	N	K	F	A	A	I	C	T	H	L	E	V	C	F
A/duck/Vietnam/HN5145/2018	H5N6	2.3.4.4g	252	M	E	D	F	V	R	Q	C	F	N	P	M	I	V	E	L	A	E	K	T	M	K	E	Y	G	E	S	P	K	I	E	T	N	K	F	A	A	I	C	T	H	L	E	V	C	F
A/duck/Vietnam/HN5147/2018	H5N6	2.3.4.4g	252	M	E	D	F	V	R	Q	C	F	N	P	M	I	V	E	L	A	E	K	T	M	K	E	Y	G	E	S	P	K	I	E	T	N	K	F	A	A	I	C	T	H	L	E	V	C	F
A/duck/Vietnam/HN5148/2018	H5N6*	2.3.4.4g	252	M	E	D	F	V	R	Q	C	F	N	P	M	I	V	E	L	A	E	K	T	M	K	E	Y	G	E	S	P	K	I	E	T	N	K	F	A	A	I	C	T	H	L	E	V	C	F
A/duck/Vietnam/HN5149/2018	H5N6	2.3.4.4g	252	M	E	D	F	V	R	Q	C	F	N	P	M	I	V	E	L	A	E	K	T	M	K	E	Y	G	E	S	P	K	I	E	T	N	K	F	A	A	I	C	T	H	L	E	V	C	F
*Samples did not show 'mixed' HA sequences, but they did show 'mixed' N6 NA and mixed PB2, PB1, PA, and NS1 sequences.
[truncated: 206 more columns]

## Sheet: A_HA_H5
Supplemental Table 2: Consensus sequences of viral proteins isolated in this study.
			Mature																	1	2	3	4	5	6	7	8	9	10	11	12	13	14	15	16	17	18	19	20	21	22	23	24	25	26	27	28	29	30
Virus	Subtype	Clade	Full-length	1	2	3	4	5	6	7	8	9	10	11	12	13	14	15	16	17	18	19	20	21	22	23	24	25	26	27	28	29	30	31	32	33	34	35	36	37	38	39	40	41	42	43	44	45	46
A/muscovy-duck/Vietnam/HN4711/2018	H5N6	2.3.4.4h	566	M	E	K	I	V	L	L	L	S	V	V	S	L	V	K	S	D	Q	I	C	I	G	Y	H	A	N	N	S	T	E	Q	V	D	T	I	M	E	K	N	V	T	V	T	H	A	Q
A/muscovy-duck/Vietnam/HN4713/2018	H5N6	2.3.4.4h	566	M	E	K	I	V	L	L	L	S	V	V	S	L	V	K	S	D	Q	I	C	I	G	Y	H	A	N	N	S	T	E	Q	V	D	T	I	M	E	K	N	V	T	V	T	H	A	Q
A/muscovy-duck/Vietnam/HN4714/2018	H5N6	2.3.4.4h	566	M	E	K	I	V	L	L	L	S	V	V	S	L	V	K	S	D	Q	I	C	I	G	Y	H	A	N	N	S	T	E	Q	V	D	T	I	M	E	K	N	V	T	V	T	H	A	Q
A/muscovy-duck/Vietnam/HN4715/2018	H5N6	2.3.4.4h	566	M	E	K	I	V	L	L	L	S	V	V	S	L	V	K	S	D	Q	I	C	I	G	Y	H	A	N	N	S	T	E	Q	V	D	T	I	M	E	K	N	V	T	V	T	H	A	Q
A/muscovy-duck/Vietnam/HN4716/2018	H5N6	2.3.4.4h	566	M	E	K	I	V	L	L	L	S	V	V	S	L	V	K	S	D	Q	I	C	I	G	Y	H	A	N	N	S	T	E	Q	V	D	T	I	M	E	K	N	V	T	V	T	H	A	Q
A/muscovy-duck/Vietnam/HN4718/2018	H5N6	2.3.4.4h	566	M	E	K	I	V	L	L	L	S	V	V	S	L	V	K	S	D	Q	I	C	I	G	Y	H	A	N	N	S	T	E	Q	V	D	T	I	M	E	K	N	V	T	V	T	H	A	Q
A/muscovy-duck/Vietnam/HN4719/2018	H5N6	2.3.4.4h	566	M	E	K	I	V	L	L	L	S	V	V	S	L	V	K	S	D	Q	I	C	I	G	Y	H	A	N	N	S	T	E	Q	V	D	T	I	M	E	K	N	V	T	V	T	H	A	Q
A/muscovy-duck/Vietnam/HN4720/2018	H5N6	2.3.4.4h	566	M	E	K	I	V	L	L	L	S	V	V	S	L	V	K	S	D	Q	I	C	I	G	Y	H	A	N	N	S	T	E	Q	V	D	T	I	M	E	K	N	V	T	V	T	H	A	Q
A/duck/Vietnam/HN4721/2018	H5N6	2.3.4.4h	566	M	E	K	I	V	L	L	L	S	V	V	S	L	V	K	S	D	Q	I	C	I	G	Y	H	A	N	N	S	T	E	Q	V	D	T	I	M	E	K	N	V	T	V	T	H	A	Q
A/muscovy-duck/Vietnam/HN4856/2018	H5N6	2.3.4.4h	566	M	E	K	I	V	L	L	L	S	M	V	G	L	V	K	S	D	Q	I	C	I	G	Y	H	A	N	N	S	T	E	Q	V	D	T	I	M	E	K	N	V	T	V	T	H	A	Q
A/muscovy-duck/Vietnam/HN4857/2018	H5N6	2.3.4.4h	566	M	E	K	I	V	L	L	L	S	M	V	G	L	V	K	S	D	Q	I	C	I	G	Y	H	A	N	N	S	T	E	Q	V	D	T	I	M	E	K	N	V	T	V	T	H	A	Q
A/muscovy-duck/Vietnam/HN4858/2018	H5N6	2.3.4.4h	566	M	E	K	I	V	L	L	L	S	M	V	G	L	V	K	S	D	Q	I	C	I	G	Y	H	A	N	N	S	T	E	Q	V	D	T	I	M	E	K	N	V	T	V	T	H	A	Q
A/muscovy-duck/Vietnam/HN5046/2018	H5N6	2.3.4.4h	566	M	E	K	I	V	L	L	L	S	M	V	G	L	V	K	S	D	Q	I	C	I	G	Y	H	A	N	N	S	T	E	Q	V	D	T	I	M	E	K	N	V	T	V	T	H	A	Q
A/muscovy-duck/Vietnam/HN5047/2018	H5N6	2.3.4.4h	566	M	E	K	I	V	L	L	L	S	M	V	G	L	V	K	S	D	Q	I	C	I	G	Y	H	A	N	N	S	T	E	Q	V	D	T	I	M	E	K	N	V	T	V	T	H	A	Q
A/muscovy-duck/Vietnam/HN5048/2018	H5N6	2.3.4.4h	566	M	E	K	I	V	L	L	L	S	M	V	G	L	V	K	S	D	Q	I	C	I	G	Y	H	A	N	N	S	T	E	Q	V	D	T	I	M	E	K	N	V	T	V	T	H	A	Q
A/duck/Vietnam/HN5080/2018	H5N6	2.3.4.4h	566	M	E	K	I	V	L	L	L	S	M	V	G	L	V	K	S	D	Q	I	C	I	G	Y	H	A	N	N	S	T	E	Q	V	D	T	I	M	E	K	N	V	T	V	T	H	A	Q
A/muscovy-duck/Vietnam/HN5132/2018	H5N6	2.3.4.4h	566	M	E	K	I	V	L	L	L	S	M	V	G	L	V	K	S	D	Q	I	C	I	G	Y	H	A	N	N	S	T	E	Q	V	D	T	I	M	E	K	N	V	T	V	T	H	A	Q
A/muscovy-duck/Vietnam/HN5135/2018	H5N6	2.3.4.4h	566	M	E	K	I	V	L	L	L	S	M	V	G	L	V	K	S	D	Q	I	C	I	G	Y	H	A	N	N	S	T	E	Q	V	D	T	I	M	E	K	N	V	T	V	T	H	A	Q
A/muscovy-duck/Vietnam/HN5137/2018	H5N6	2.3.4.4h	566	M	E	K	I	V	L	L	L	S	M	V	G	L	V	K	S	D	Q	I	C	I	G	Y	H	A	N	N	S	T	E	Q	V	D	T	I	M	E	K	N	V	T	V	T	H	A	Q
A/muscovy-duck/Vietnam/HN5138/2018	H5N6	2.3.4.4h	566	M	E	K	I	V	L	L	L	S	M	V	G	L	V	K	S	D	Q	I	C	I	G	Y	H	A	N	N	S	T	E	Q	V	D	T	I	M	E	K	N	V	T	V	T	H	A	Q
A/muscovy-duck/Vietnam/HN5139/2018	H5N6	2.3.4.4h	566	M	E	K	I	V	L	L	L	S	M	V	G	L	V	K	S	D	Q	I	C	I	G	Y	H	A	N	N	S	T	E	Q	V	D	T	I	M	E	K	N	V	T	V	T	H	A	Q
A/muscovy-duck/Vietnam/HN5140/2018	H5H9N2N6	2.3.4.4h	566	M	E	K	I	V	L	L	L	S	M	V	G	L	V	K	S	D	Q	I	C	I	G	Y	H	A	N	N	S	T	E	Q	V	D	T	I	M	E	K	N	V	T	V	T	H	A	Q
A/muscovy-duck/Vietnam/HN5049/2018	H5N6	2.3.4.4h	566	M	E	K	I	V	L	L	L	S	M	V	G	L	V	K	S	D	Q	I	C	I	G	Y	H	A	N	N	S	T	E	Q	V	D	T	I	M	E	K	N	V	T	V	T	H	A	Q
A/duck/Vietnam/HN5150/2018	H5H6N6	2.3.4.4h	566	M	E	K	I	V	L	L	L	S	M	V	G	L	V	K	S	D	Q	I	C	I	G	Y	H	A	N	N	S	T	E	Q	V	D	T	I	M	E	K	N	V	T	V	T	H	A	Q
A/muscovy-duck/Vietnam/HN6029/2019	H5H6N6N8	2.3.4.4h	566	M	E	K	I	V	L	L	L	S	M	V	G	L	V	K	S	D	Q	I	C	I	G	Y	H	A	N	N	S	T	E	Q	V	D	T	I	M	E	K	N	V	T	V	T	H	T	R
A/muscovy-duck/Vietnam/HN6111/2020	H5N6	2.3.4.4h	566	M	E	K	I	V	L	L	L	S	M	V	G	L	V	K	S	D	Q	I	C	I	G	Y	H	A	N	N	S	T	E	Q	V	D	T	I	M	E	K	N	V	T	V	T	H	T	R
A/muscovy-duck/Vietnam/HN6113/2020	H5N6	2.3.4.4h	566	M	E	K	I	V	L	L	L	S	M	V	G	L	V	K	S	D	Q	I	C	I	G	Y	H	A	N	N	S	T	E	Q	V	D	T	I	M	E	K	N	V	T	V	T	H	T	R
A/muscovy-duck/Vietnam/HN6114/2020	H5N6	2.3.4.4h	566	M	E	K	I	V	L	L	L	S	M	V	G	L	V	K	S	D	Q	I	C	I	G	Y	H	A	N	N	S	T	E	Q	V	D	T	I	M	E	K	N	V	T	V	T	H	T	R
A/muscovy-duck/Vietnam/HN6115/2020	H5N6	2.3.4.4h	566	M	E	K	I	V	L	L	L	S	M	V	G	L	V	K	S	D	Q	I	C	I	G	Y	H	A	N	N	S	T	E	Q	V	D	T	I	M	E	K	N	V	T	V	T	H	T	R
A/muscovy-duck/Vietnam/HN6119/2020	H5N6	2.3.4.4h	566	M	E	K	I	V	L	L	L	S	M	V	G	L	V	K	S	D	Q	I	C	I	G	Y	H	A	N	N	S	T	E	Q	V	D	T	I	M	E	K	N	V	T	V	T	H	T	R
A/muscovy-duck/Vietnam/HN6120/2020	H5N6	2.3.4.4h	566	M	E	K	I	V	L	L	L	S	M	V	G	L	V	K	S	D	Q	I	C	I	G	Y	H	A	N	N	S	T	E	Q	V	D	T	I	M	E	K	N	V	T	V	T	H	T	R
A/muscovy-duck/Vietnam/HN6606/2020	H5N6	2.3.4.4h	566	M	E	K	I	V	L	L	L	S	V	F	G	L	V	K	N	D	Q	I	C	I	G	Y	H	A	N	N	S	T	E	Q	V	D	T	I	M	E	K	N	V	T	V	T	H	A	Q
A/muscovy-duck/Vietnam/HN6607/2020	H5N6	2.3.4.4h	566	M	E	K	I	V	L	L	L	S	V	F	G	L	V	K	N	D	Q	I	C	I	G	Y	H	A	N	N	S	T	E	Q	V	D	T	I	M	E	K	N	V	T	V	T	H	A	Q
A/muscovy-duck/Vietnam/HN6608/2020	H5N6	2.3.4.4h	566	M	E	K	I	V	L	L	L	S	V	F	G	L	V	K	N	D	Q	I	C	I	G	Y	H	A	N	N	S	T	E	Q	V	D	T	I	M	E	K	N	V	T	V	T	H	A	Q
A/muscovy-duck/Vietnam/HN6609/2020	H5N6	2.3.4.4h	566	M	E	K	I	V	L	L	L	S	V	F	G	L	V	K	N	D	Q	I	C	I	G	Y	H	A	N	N	S	T	E	Q	V	D	T	I	M	E	K	N	V	T	V	T	H	A	Q
A/muscovy-duck/Vietnam/HN6610/2020	H5N6	2.3.4.4h	566	M	E	K	I	V	L	L	L	S	V	F	G	L	V	K	N	D	Q	I	C	I	G	Y	H	A	N	N	S	T	E	Q	V	D	T	I	M	E	K	N	V	T	V	T	H	A	Q
A/duck/Vietnam/HN6611/2020	H5N6	2.3.4.4h	566	M	E	K	I	V	L	L	L	S	V	F	G	L	V	K	N	D	Q	I	C	I	G	Y	H	A	N	N	S	T	E	Q	V	D	T	I	M	E	K	N	V	T	V	T	H	A	Q
A/muscovy-duck/Vietnam/HN6692/2020	H5N6	2.3.4.4h	566	M	E	K	V	V	F	L	L	S	M	V	G	L	V	K	S	D	Q	I	C	I	G	Y	H	A	N	N	S	T	E	Q	V	D	T	I	M	E	K	N	V	T	V	T	H	A	Q
A/muscovy-duck/Vietnam/HN6698/2020	H4H5N6	2.3.4.4h	566	M	E	K	V	V	F	L	L	S	M	V	G	L	V	K	S	D	Q	I	C	I	G	Y	H	A	N	N	S	T	E	Q	V	D	T	I	M	E	K	N	V	T	V	T	H	A	Q
A/muscovy-duck/Vietnam/HN6699/2020	H4H5N6	2.3.4.4h	566	M	E	K	V	V	F	L	L	S	M	V	G	L	V	K	S	D	Q	I	C	I	G	Y	H	A	N	N	S	T	E	Q	V	D	T	I	M	E	K	N	V	T	V	T	H	A	Q
A/muscovy-duck/Vietnam/HN6811/2020	H5H6N6	2.3.4.4h	566	M	E	K	V	V	L	L	L	S	M	V	G	L	V	K	S	D	Q	I	C	I	G	Y	H	A	N	N	S	T	E	Q	V	D	T	I	M	E	K	N	V	T	V	T	H	A	Q
A/muscovy-duck/Vietnam/HN6881/2021	H5N6	2.3.4.4h	566	M	E	K	I	V	L	L	L	S	V	F	G	L	V	K	N	D	Q	I	C	I	G	Y	H	A	N	N	S	T	E	Q	V	D	T	I	M	E	K	N	V	T	V	T	H	A	Q
A/muscovy-duck/Vietnam/HN6884/2021	H5N6	2.3.4.4h	566	M	E	K	I	V	L	L	L	S	V	F	G	L	V	K	N	D	Q	I	C	I	G	Y	H	A	N	N	S	T	E	Q	V	D	T	I	M	E	K	N	V	T	V	T	H	A	Q
A/muscovy-duck/Vietnam/HN6890/2021	H5N6	2.3.4.4h	566	M	E	K	I	V	L	L	L	S	V	F	G	L	V	K	N	D	Q	I	C	I	G	Y	H	A	N	N	S	T	E	Q	V	D	T	I	M	E	K	N	V	T	V	T	H	A	Q
A/duck/Vietnam/HN6893/2021	H5N6	2.3.4.4h	566	M	E	K	I	V	L	L	L	S	V	F	G	L	V	K	N	D	Q	I	C	I	G	Y	H	A	N	N	S	T	E	Q	V	D	T	I	M	E	K	N	V	T	V	T	H	A	Q
A/duck/Vietnam/HN6894/2021	H5N6	2.3.4.4h	566	M	E	K	I	V	L	L	L	S	V	F	G	L	V	K	N	D	Q	I	C	I	G	Y	H	A	N	N	S	T	E	Q	V	D	T	I	M	E	K	N	V	T	V	T	H	A	Q
A/duck/Vietnam/HN6896/2021	H5N6	2.3.4.4h	566	M	E	K	I	V	L	L	L	S	V	F	G	L	V	K	N	D	Q	I	C	I	G	Y	H	A	N	N	S	T	E	Q	V	D	T	I	M	E	K	N	V	T	V	T	H	A	Q
A/duck/Vietnam/HN6897/2021	H5N6	2.3.4.4h	566	M	E	K	I	V	L	L	L	S	V	F	G	L	V	K	N	D	Q	I	C	I	G	Y	H	A	N	N	S	T	E	Q	V	D	T	I	M	E	K	N	V	T	V	T	H	A	Q
A/duck/Vietnam/HN6898/2021	H5N6	2.3.4.4h	566	M	E	K	I	V	L	L	L	S	V	F	G	L	V	K	N	D	Q	I	C	I	G	Y	H	A	N	N	S	T	E	Q	V	D	T	I	M	E	K	N	V	T	V	T	H	A	Q
A/duck/Vietnam/QN6519/2020	H5N6	2.3.4.4h	566	M	E	K	I	V	L	L	L	S	M	V	G	L	V	K	S	D	Q	I	C	I	G	Y	H	A	N	N	S	T	E	Q	V	D	T	I	M	E	K	N	V	T	V	T	H	A	R
A/duck/Vietnam/QN6658/2020	H5N6	2.3.4.4h	566	M	E	K	V	V	F	L	L	S	M	V	G	L	V	K	S	D	Q	I	C	I	G	Y	H	A	N	N	S	T	E	Q	V	D	T	I	M	E	K	N	V	T	V	T	H	A	Q
A/duck/Vietnam/QN6659/2020	H5N6	2.3.4.4h	566	M	E	K	V	V	F	L	L	S	M	V	G	L	V	K	S	D	Q	I	C	I	G	Y	H	A	N	N	S	T	E	Q	V	D	T	I	M	E	K	N	V	T	V	T	H	A	Q
A/duck/Vietnam/QN6660/2020	H5N6	2.3.4.4h	566	M	E	K	V	V	F	L	L	S	M	V	G	L	V	K	S	D	Q	I	C	I	G	Y	H	A	N	N	S	T	E	Q	V	D	T	I	M	E	K	N	V	T	V	T	H	A	Q
A/duck/Vietnam/QN6661/2020	H5N6	2.3.4.4h	566	M	E	K	V	V	F	L	L	S	M	V	G	L	V	K	S	D	Q	I	C	I	G	Y	H	A	N	N	S	T	E	Q	V	D	T	I	M	E	K	N	V	T	V	T	H	A	Q
A/duck/Vietnam/QN6730/2020	H5N6	2.3.4.4h	566	M	E	K	V	V	F	L	L	S	M	V	G	L	V	K	S	D	Q	I	C	I	G	Y	H	A	N	N	S	T	E	Q	V	D	T	I	M	E	K	N	V	T	V	T	H	A	Q
A/duck/Vietnam/QN6736/2020	H4H5N2N6	2.3.4.4h	566	M	E	K	I	V	L	L	L	S	M	V	G	L	V	K	S	D	Q	I	C	I	G	Y	H	A	N	N	S	T	E	Q	V	D	T	I	M	E	K	N	V	T	V	T	H	A	Q
A/duck/Vietnam/QN6739/2020	H5N6	2.3.4.4h	566	M	E	K	V	V	F	L	L	S	M	V	G	L	V	K	S	D	Q	I	C	I	G	Y	H	A	N	N	S	T	E	Q	V	D	T	I	M	E	K	N	V	T	V	T	H	A	Q
A/duck/Vietnam/QN6796/2020	H5N6	2.3.4.4h	566	M	E	K	V	V	F	L	L	S	M	V	G	L	V	K	S	D	Q	I	C	I	G	Y	H	A	N	N	S	T	E	Q	V	D	T	I	M	E	K	N	V	T	V	T	H	A	Q
A/duck/Vietnam/QN6798/2020	H5N6	2.3.4.4h	566	M	E	K	V	V	F	L	L	S	M	V	G	L	V	K	S	D	Q	I	C	I	G	Y	H	A	N	N	S	T	E	Q	V	D	T	I	M	E	K	N	V	T	V	T	H	A	Q
A/duck/Vietnam/QN6799/2020	H5N6	2.3.4.4h	566	M	E	K	V	V	F	L	L	S	M	V	G	L	V	K	S	D	Q	I	C	I	G	Y	H	A	N	N	S	T	E	Q	V	D	T	I	M	E	K	N	V	T	V	T	H	A	Q
A/duck/Vietnam/QN6800/2020	H5N6	2.3.4.4h	566	M	E	K	V	V	F	L	L	S	M	V	G	L	V	K	S	D	Q	I	C	I	G	Y	H	A	N	N	S	T	E	Q	V	D	T	I	M	E	K	N	V	T	V	T	H	A	Q
A/duck/Vietnam/QN6801/2020	H5N6	2.3.4.4h	566	M	E	K	V	V	F	L	L	S	M	V	G	L	V	K	S	D	Q	I	C	I	G	Y	H	A	N	N	S	T	E	Q	V	D	T	I	M	E	K	N	V	T	V	T	H	A	Q
A/duck/Vietnam/QN6803/2020	H3H5N2N6	2.3.4.4h	566	M	E	K	V	V	F	L	L	S	M	V	G	L	V	K	S	D	Q	I	C	I	G	Y	H	A	N	N	S	T	E	Q	V	D	T	I	M	E	K	N	V	T	V	T	H	A	Q
A/duck/Vietnam/QN6804/2020	H5N6	2.3.4.4h	566	M	E	K	V	V	F	L	L	S	M	V	G	L	V	K	S	D	Q	I	C	I	G	Y	H	A	N	N	S	T	E	Q	V	D	T	I	M	E	K	N	V	T	V	T	H	A	Q
A/duck/Vietnam/QN6805/2020	H5N6	2.3.4.4h	566	M	E	K	V	V	F	L	L	S	M	V	G	L	V	K	S	D	Q	I	C	I	G	Y	H	A	N	N	S	T	E	Q	V	D	T	I	M	E	K	N	V	T	V	T	H	A	Q
A/duck/Vietnam/QN6806/2020	H5N6	2.3.4.4h	566	M	E	K	V	V	F	L	L	S	M	V	G	L	V	K	S	D	Q	I	C	I	G	Y	H	A	N	N	S	T	E	Q	V	D	T	I	M	E	K	N	V	T	V	T	H	A	Q
A/duck/Vietnam/QN6807/2020	H3H5N2N6N8	2.3.4.4h	566	M	E	K	V	V	F	L	L	S	M	V	G	L	V	K	S	D	Q	I	C	I	G	Y	H	A	N	N	S	T	E	Q	V	D	T	I	M	E	K	N	V	T	V	T	H	A	Q
A/duck/Vietnam/QN6808/2020	H5N6	2.3.4.4h	566	M	E	K	V	V	F	L	L	S	M	V	G	L	V	K	S	D	Q	I	C	I	G	Y	H	A	N	N	S	T	E	Q	V	D	T	I	M	E	K	N	V	T	V	T	H	A	Q
A/duck/Vietnam/QN6809/2020	H3H5N6	2.3.4.4h	566	M	E	K	V	V	F	L	L	S	M	V	G	L	V	K	S	D	Q	I	C	I	G	Y	H	A	N	N	S	T	E	Q	V	D	T	I	M	E	K	N	V	T	V	T	H	A	Q
A/duck/Vietnam/HN5141/2018	H5N6	2.3.4.4g	567	M	E	K	I	V	L	L	L	A	V	I	G	L	V	K	S	D	Q	I	C	I	G	Y	H	A	N	N	S	T	E	Q	V	D	T	I	M	E	K	N	V	T	V	T	H	A	Q
A/duck/Vietnam/HN5142/2018	H5N6	2.3.4.4g	567	M	E	K	I	V	L	L	L	A	V	I	G	L	V	K	S	D	Q	I	C	I	G	Y	H	A	N	N	S	T	E	Q	V	D	T	I	M	E	K	N	V	T	V	T	H	A	Q
A/duck/Vietnam/HN5143/2018	H5N6	2.3.4.4g	567	M	E	K	I	V	L	L	L	A	V	I	G	L	V	K	S	D	Q	I	C	I	G	Y	H	A	N	N	S	T	E	Q	V	D	T	I	M	E	K	N	V	T	V	T	H	A	Q
A/duck/Vietnam/HN5144/2018	H5N6*	2.3.4.4g	567	M	E	K	I	V	L	L	L	A	V	I	G	L	V	K	S	D	Q	I	C	I	G	Y	H	A	N	N	S	T	E	Q	V	D	T	I	M	E	K	N	V	T	V	T	H	A	Q
A/duck/Vietnam/HN5145/2018	H5N6	2.3.4.4g	567	M	E	K	I	V	L	L	L	A	V	I	G	L	V	K	S	D	Q	I	C	I	G	Y	H	A	N	N	S	T	E	Q	V	D	T	I	M	E	K	N	V	T	V	T	H	A	Q
A/duck/Vietnam/HN5147/2018	H5N6	2.3.4.4g	567	M	E	K	I	V	L	L	L	A	V	I	G	L	V	K	S	D	Q	I	C	I	G	Y	H	A	N	N	S	T	E	Q	V	D	T	I	M	E	K	N	V	T	V	T	H	A	Q
A/duck/Vietnam/HN5148/2018	H5N6*	2.3.4.4g	567	M	E	K	I	V	L	L	L	A	V	I	G	L	V	K	S	D	Q	I	C	I	G	Y	H	A	N	N	S	T	E	Q	V	D	T	I	M	E	K	N	V	T	V	T	H	A	Q
A/duck/Vietnam/HN5149/2018	H5N6	2.3.4.4g	567	M	E	K	I	V	L	L	L	A	V	I	G	L	V	K	S	D	Q	I	C	I	G	Y	H	A	N	N	S	T	E	Q	V	D	T	I	M	E	K	N	V	T	V	T	H	A	Q
*Samples did not show 'mixed' HA sequences, but they did show 'mixed' N6 NA and mixed PB2, PB1, PA, and NS1 sequences.
[truncated: 521 more columns]

## Sheet: A_NP
Supplemental Table 2: Consensus sequences of viral proteins isolated in this study.
Virus	Subtype	Clade	Protein Length	1	2	3	4	5	6	7	8	9	10	11	12	13	14	15	16	17	18	19	20	21	22	23	24	25	26	27	28	29	30	31	32	33	34	35	36	37	38	39	40	41	42	43	44	45	46
A/muscovy-duck/Vietnam/HN4711/2018	H5N6	2.3.4.4h	498	M	A	S	Q	G	T	K	R	S	Y	E	Q	M	E	T	G	G	E	R	Q	N	A	T	E	I	R	A	S	V	G	R	M	V	G	G	I	G	R	F	Y	I	Q	M	C	T	E
A/muscovy-duck/Vietnam/HN4713/2018	H5N6	2.3.4.4h	498	M	A	S	Q	G	T	K	R	S	Y	E	Q	M	E	T	G	G	E	R	Q	N	A	T	E	I	R	A	S	V	G	R	M	V	G	G	I	G	R	F	Y	I	Q	M	C	T	E
A/muscovy-duck/Vietnam/HN4714/2018	H5N6	2.3.4.4h	498	M	A	S	Q	G	T	K	R	S	Y	E	Q	M	E	T	G	G	E	R	Q	N	A	T	E	I	R	A	S	V	G	R	M	V	G	G	I	G	R	F	Y	I	Q	M	C	T	E
A/muscovy-duck/Vietnam/HN4715/2018	H5N6	2.3.4.4h	498	M	A	S	Q	G	T	K	R	S	Y	E	Q	M	E	T	G	G	E	R	Q	N	A	T	E	I	R	A	S	V	G	R	M	V	G	G	I	G	R	F	Y	I	Q	M	C	T	E
A/muscovy-duck/Vietnam/HN4716/2018	H5N6	2.3.4.4h	498	M	A	S	Q	G	T	K	R	S	Y	E	Q	M	E	T	G	G	E	R	Q	N	A	T	E	I	R	A	S	V	G	R	M	V	G	G	I	G	R	F	Y	I	Q	M	C	T	E
A/muscovy-duck/Vietnam/HN4718/2018	H5N6	2.3.4.4h	498	M	A	S	Q	G	T	K	R	S	Y	E	Q	M	E	T	G	G	E	R	Q	N	A	T	E	I	R	A	S	V	G	R	M	V	G	G	I	G	R	F	Y	I	Q	M	C	T	E
A/muscovy-duck/Vietnam/HN4719/2018	H5N6	2.3.4.4h	498	M	A	S	Q	G	T	K	R	S	Y	E	Q	M	E	T	G	G	E	R	Q	N	A	T	E	I	R	A	S	V	G	R	M	V	G	G	I	G	R	F	Y	I	Q	M	C	T	E
A/muscovy-duck/Vietnam/HN4720/2018	H5N6	2.3.4.4h	498	M	A	S	Q	G	T	K	R	S	Y	E	Q	M	E	T	G	G	E	R	Q	N	A	T	E	I	R	A	S	V	G	R	M	V	G	G	I	G	R	F	Y	I	Q	M	C	T	E
A/duck/Vietnam/HN4721/2018	H5N6	2.3.4.4h	498	M	A	S	Q	G	T	K	R	S	Y	E	Q	M	E	T	G	G	E	R	Q	N	A	T	E	I	R	A	S	V	G	R	M	V	G	G	I	G	R	F	Y	I	Q	M	C	T	E
A/muscovy-duck/Vietnam/HN4856/2018	H5N6	2.3.4.4h	498	M	A	S	Q	G	T	K	R	S	Y	E	Q	M	E	T	G	G	E	R	Q	N	A	T	E	I	R	A	S	V	G	R	M	V	G	G	I	G	R	F	Y	I	Q	M	C	T	E
A/muscovy-duck/Vietnam/HN4857/2018	H5N6	2.3.4.4h	498	M	A	S	Q	G	T	K	R	S	Y	E	Q	M	E	T	G	G	E	R	Q	N	A	T	E	I	R	A	S	V	G	R	M	V	G	G	I	G	R	F	Y	I	Q	M	C	T	E
A/muscovy-duck/Vietnam/HN4858/2018	H5N6	2.3.4.4h	498	M	A	S	Q	G	T	K	R	S	Y	E	Q	M	E	T	G	G	E	R	Q	N	A	T	E	I	R	A	S	V	G	R	M	V	G	G	I	G	R	F	Y	I	Q	M	C	T	E
A/muscovy-duck/Vietnam/HN5046/2018	H5N6	2.3.4.4h	498	M	A	S	Q	G	T	K	R	S	Y	E	Q	M	E	T	G	G	E	R	Q	N	A	T	E	I	R	A	S	V	G	R	M	V	G	G	I	G	R	F	Y	I	Q	M	C	T	E
A/muscovy-duck/Vietnam/HN5047/2018	H5N6	2.3.4.4h	498	M	A	S	Q	G	T	K	R	S	Y	E	Q	M	E	T	G	G	E	R	Q	N	A	T	E	I	R	A	S	V	G	R	M	V	G	G	I	G	R	F	Y	I	Q	M	C	T	E
A/muscovy-duck/Vietnam/HN5048/2018	H5N6	2.3.4.4h	498	M	A	S	Q	G	T	K	R	S	Y	E	Q	M	E	T	G	G	E	R	Q	N	A	T	E	I	R	A	S	V	G	R	M	V	G	G	I	G	R	F	Y	I	Q	M	C	T	E
A/duck/Vietnam/HN5080/2018	H5N6	2.3.4.4h	498	M	A	S	Q	G	T	K	R	S	Y	E	Q	M	E	T	G	G	E	R	Q	N	A	T	E	I	R	A	S	V	G	R	M	V	G	G	I	G	R	F	Y	I	Q	M	C	T	E
A/muscovy-duck/Vietnam/HN5132/2018	H5N6	2.3.4.4h	498	M	A	S	Q	G	T	K	R	S	Y	E	Q	M	E	T	G	G	E	R	Q	N	A	T	E	I	R	A	S	V	G	R	M	V	G	G	I	G	R	F	Y	I	Q	M	C	T	E
A/muscovy-duck/Vietnam/HN5135/2018	H5N6	2.3.4.4h	498	M	A	S	Q	G	T	K	R	S	Y	E	Q	M	E	T	G	G	E	R	Q	N	A	T	E	I	R	A	S	V	G	R	M	V	G	G	I	G	R	F	Y	I	Q	M	C	T	E
A/muscovy-duck/Vietnam/HN5137/2018	H5N6	2.3.4.4h	498	M	A	S	Q	G	T	K	R	S	Y	E	Q	M	E	T	G	G	E	R	Q	N	A	T	E	I	R	A	S	V	G	R	M	V	G	G	I	G	R	F	Y	I	Q	M	C	T	E
A/muscovy-duck/Vietnam/HN5138/2018	H5N6	2.3.4.4h	498	M	A	S	Q	G	T	K	R	S	Y	E	Q	M	E	T	G	G	E	R	Q	N	A	T	E	I	R	A	S	V	G	R	M	V	G	G	I	G	R	F	Y	I	Q	M	C	T	E
A/muscovy-duck/Vietnam/HN5139/2018	H5N6	2.3.4.4h	498	M	A	S	Q	G	T	K	R	S	Y	E	Q	M	E	T	G	G	E	R	Q	N	A	T	E	I	R	A	S	V	G	R	M	V	G	G	I	G	R	F	Y	I	Q	M	C	T	E
A/muscovy-duck/Vietnam/HN5140/2018	H5H9N2N6	2.3.4.4h	498	M	A	S	Q	G	T	K	R	S	Y	E	Q	M	E	T	G	G	E	R	Q	N	A	T	E	I	R	A	S	V	G	R	M	V	S	G	I	G	R	F	Y	I	Q	M	C	T	E
A/muscovy-duck/Vietnam/HN5049/2018	H5N6	2.3.4.4h	498	M	A	S	Q	G	T	K	R	S	Y	E	Q	M	E	T	G	G	E	R	Q	N	A	T	E	I	R	A	S	V	G	R	M	V	G	G	I	G	R	F	Y	I	Q	M	C	T	E
A/duck/Vietnam/HN5150/2018	H5H6N6	2.3.4.4h	498	M	A	S	Q	G	T	K	R	S	Y	E	Q	M	E	T	G	G	E	R	Q	N	A	T	E	I	R	A	S	V	G	R	M	V	G	G	I	G	R	F	Y	I	Q	M	C	T	E
A/muscovy-duck/Vietnam/HN6029/2019	H5H6N6N8	2.3.4.4h	498	M	A	S	Q	G	T	K	R	S	Y	E	Q	M	E	T	G	G	E	R	Q	N	A	T	E	I	R	A	S	V	G	R	M	V	G	G	I	G	R	F	Y	I	Q	M	C	T	E
A/muscovy-duck/Vietnam/HN6111/2020	H5N6	2.3.4.4h	498	M	A	S	Q	G	T	K	R	S	Y	E	Q	M	E	T	G	G	E	R	Q	N	A	T	E	I	R	A	S	V	G	R	M	V	G	G	I	G	R	F	Y	I	Q	M	C	T	E
A/muscovy-duck/Vietnam/HN6113/2020	H5N6	2.3.4.4h	498	M	A	S	Q	G	T	K	R	S	Y	E	Q	M	E	T	G	G	E	R	Q	N	A	T	E	I	R	A	S	V	G	R	M	V	G	G	I	G	R	F	Y	I	Q	M	C	T	E
A/muscovy-duck/Vietnam/HN6114/2020	H5N6	2.3.4.4h	498	M	A	S	Q	G	T	K	R	S	Y	E	Q	M	E	T	G	G	E	R	Q	N	A	T	E	I	R	A	S	V	G	R	M	V	G	G	I	G	R	F	Y	I	Q	M	C	T	E
A/muscovy-duck/Vietnam/HN6115/2020	H5N6	2.3.4.4h	498	M	A	S	Q	G	T	K	R	S	Y	E	Q	M	E	T	G	G	E	R	Q	N	A	T	E	I	R	A	S	V	G	R	M	V	G	G	I	G	R	F	Y	I	Q	M	C	T	E
A/muscovy-duck/Vietnam/HN6119/2020	H5N6	2.3.4.4h	498	M	A	S	Q	G	T	K	R	S	Y	E	Q	M	E	T	G	G	E	R	Q	N	A	T	E	I	R	A	S	V	G	R	M	V	G	G	I	G	R	F	Y	I	Q	M	C	T	E
A/muscovy-duck/Vietnam/HN6120/2020	H5N6	2.3.4.4h	498	M	A	S	Q	G	T	K	R	S	Y	E	Q	M	E	T	G	G	E	R	Q	N	A	T	E	I	R	A	S	V	G	R	M	V	G	G	I	G	R	F	Y	I	Q	M	C	T	E
A/muscovy-duck/Vietnam/HN6606/2020	H5N6	2.3.4.4h	498	M	A	S	Q	G	T	K	R	S	Y	E	Q	M	E	T	G	G	E	R	Q	N	A	T	E	I	R	A	S	V	G	R	M	V	G	G	I	G	R	F	Y	I	Q	M	C	T	E
A/muscovy-duck/Vietnam/HN6607/2020	H5N6	2.3.4.4h	498	M	A	S	Q	G	T	K	R	S	Y	E	Q	M	E	T	G	G	E	R	Q	N	A	T	E	I	R	A	S	V	G	R	M	V	G	G	I	G	R	F	Y	I	Q	M	C	T	E
A/muscovy-duck/Vietnam/HN6608/2020	H5N6	2.3.4.4h	498	M	A	S	Q	G	T	K	R	S	Y	E	Q	M	E	T	G	G	E	R	Q	N	A	T	E	I	R	A	S	V	G	R	M	V	G	G	I	G	R	F	Y	I	Q	M	C	T	E
A/muscovy-duck/Vietnam/HN6609/2020	H5N6	2.3.4.4h	498	M	A	S	Q	G	T	K	R	S	Y	E	Q	M	E	T	G	G	E	R	Q	N	A	T	E	I	R	A	S	V	G	R	M	V	G	G	I	G	R	F	Y	I	Q	M	C	T	E
A/muscovy-duck/Vietnam/HN6610/2020	H5N6	2.3.4.4h	498	M	A	S	Q	G	T	K	R	S	Y	E	Q	M	E	T	G	G	E	R	Q	N	A	T	E	I	R	A	S	V	G	R	M	V	G	G	I	G	R	F	Y	I	Q	M	C	T	E
A/duck/Vietnam/HN6611/2020	H5N6	2.3.4.4h	498	M	A	S	Q	G	T	K	R	S	Y	E	Q	M	E	T	G	G	E	R	Q	N	A	T	E	I	R	A	S	V	G	R	M	V	G	G	I	G	R	F	Y	I	Q	M	C	T	E
A/muscovy-duck/Vietnam/HN6692/2020	H5N6	2.3.4.4h	498	M	A	S	Q	G	T	K	R	S	Y	E	Q	M	E	T	G	G	E	R	Q	N	A	T	E	I	R	A	S	V	G	R	M	V	G	G	I	G	R	F	Y	I	Q	M	C	T	E
A/muscovy-duck/Vietnam/HN6698/2020	H4H5N6	2.3.4.4h	498	M	A	S	Q	G	T	K	R	S	Y	E	Q	M	E	T	G	G	E	R	Q	N	A	T	E	I	R	A	S	V	G	R	M	V	G	G	I	G	R	F	Y	I	Q	M	C	T	E
A/muscovy-duck/Vietnam/HN6699/2020	H4H5N6	2.3.4.4h	498	M	A	S	Q	G	T	K	R	S	Y	E	Q	M	E	T	G	G	E	R	Q	N	A	T	E	I	R	A	S	V	G	R	M	V	G	G	I	G	R	F	Y	I	Q	M	C	T	E
A/muscovy-duck/Vietnam/HN6811/2020	H5H6N6	2.3.4.4h	498	M	A	S	Q	G	T	K	R	S	Y	E	Q	M	E	T	G	G	E	R	Q	N	A	T	E	I	R	A	S	V	G	R	M	V	G	G	I	G	R	F	Y	I	Q	M	C	T	E
A/muscovy-duck/Vietnam/HN6881/2021	H5N6	2.3.4.4h	498	M	A	S	Q	G	T	K	R	S	Y	E	Q	M	E	T	G	G	E	R	Q	N	A	T	E	I	R	A	S	V	G	R	M	V	G	G	I	G	R	F	Y	I	Q	M	C	T	E
A/muscovy-duck/Vietnam/HN6884/2021	H5N6	2.3.4.4h	498	M	A	S	Q	G	T	K	R	S	Y	E	Q	M	E	T	G	G	E	R	Q	N	A	T	E	I	R	A	S	V	G	R	M	V	G	G	I	G	R	F	Y	I	Q	M	C	T	E
A/muscovy-duck/Vietnam/HN6890/2021	H5N6	2.3.4.4h	498	M	A	S	Q	G	T	K	R	S	Y	E	Q	M	E	T	G	G	E	R	Q	N	A	T	E	I	R	A	S	V	G	R	M	V	G	G	I	G	R	F	Y	I	Q	M	C	T	E
A/duck/Vietnam/HN6893/2021	H5N6	2.3.4.4h	498	M	A	S	Q	G	T	K	R	S	Y	E	Q	M	E	T	G	G	E	R	Q	N	A	T	E	I	R	A	S	V	G	R	M	V	G	G	I	G	R	F	Y	I	Q	M	C	T	E
A/duck/Vietnam/HN6894/2021	H5N6	2.3.4.4h	498	M	A	S	Q	G	T	K	R	S	Y	E	Q	M	E	T	G	G	E	R	Q	N	A	T	E	I	R	A	S	V	G	R	M	V	G	G	I	G	R	F	Y	I	Q	M	C	T	E
A/duck/Vietnam/HN6896/2021	H5N6	2.3.4.4h	498	M	A	S	Q	G	T	K	R	S	Y	E	Q	M	E	T	G	G	E	R	Q	N	A	T	E	I	R	A	S	V	G	R	M	V	G	G	I	G	R	F	Y	I	Q	M	C	T	E
A/duck/Vietnam/HN6897/2021	H5N6	2.3.4.4h	498	M	A	S	Q	G	T	K	R	S	Y	E	Q	M	E	T	G	G	E	R	Q	N	A	T	E	I	R	A	S	V	G	R	M	V	G	G	I	G	R	F	Y	I	Q	M	C	T	E
A/duck/Vietnam/HN6898/2021	H5N6	2.3.4.4h	498	M	A	S	Q	G	T	K	R	S	Y	E	Q	M	E	T	G	G	E	R	Q	N	A	T	E	I	R	A	S	V	G	R	M	V	G	G	I	G	R	F	Y	I	Q	M	C	T	E
A/duck/Vietnam/QN6519/2020	H5N6	2.3.4.4h	498	M	A	S	Q	G	T	K	R	S	Y	E	Q	M	E	T	G	G	E	R	Q	N	A	T	E	I	R	A	S	V	G	R	M	V	G	G	I	G	R	F	Y	I	Q	M	C	T	E
A/duck/Vietnam/QN6658/2020	H5N6	2.3.4.4h	498	M	A	S	Q	G	T	K	R	S	Y	E	Q	M	E	T	G	G	E	R	Q	N	A	T	E	I	R	A	S	V	G	R	M	V	G	G	I	G	R	F	Y	I	Q	M	C	T	E
A/duck/Vietnam/QN6659/2020	H5N6	2.3.4.4h	498	M	A	S	Q	G	T	K	R	S	Y	E	Q	M	E	T	G	G	E	R	Q	N	A	T	E	I	R	A	S	V	G	R	M	V	G	G	I	G	R	F	Y	I	Q	M	C	T	E
A/duck/Vietnam/QN6660/2020	H5N6	2.3.4.4h	498	M	A	S	Q	G	T	K	R	S	Y	E	Q	M	E	T	G	G	E	R	Q	N	A	T	E	I	R	A	S	V	G	R	M	V	G	G	I	G	R	F	Y	I	Q	M	C	T	E
A/duck/Vietnam/QN6661/2020	H5N6	2.3.4.4h	498	M	A	S	Q	G	T	K	R	S	Y	E	Q	M	E	T	G	G	E	R	Q	N	A	T	E	I	R	A	S	V	G	R	M	V	G	G	I	G	R	F	Y	I	Q	M	C	T	E
A/duck/Vietnam/QN6730/2020	H5N6	2.3.4.4h	498	M	A	S	Q	G	T	K	R	S	Y	E	Q	M	E	T	G	G	E	R	Q	N	A	T	E	I	R	A	S	V	G	R	M	V	G	G	I	G	R	F	Y	I	Q	M	C	T	E
A/duck/Vietnam/QN6736/2020	H4H5N2N6	2.3.4.4h	498	M	A	S	Q	G	T	K	R	S	Y	E	Q	M	E	T	G	G	E	R	Q	N	A	T	E	I	R	A	S	V	G	R	M	V	G	G	I	G	R	F	Y	I	Q	M	C	T	E
A/duck/Vietnam/QN6739/2020	H5N6	2.3.4.4h	498	M	A	S	Q	G	T	K	R	S	Y	E	Q	M	E	T	G	G	E	R	Q	N	A	T	E	I	R	A	S	V	G	R	M	V	G	G	I	G	R	F	Y	I	Q	M	C	T	E
A/duck/Vietnam/QN6796/2020	H5N6	2.3.4.4h	498	M	A	S	Q	G	T	K	R	S	Y	E	Q	M	E	T	G	G	E	R	Q	N	A	T	E	I	R	A	S	V	G	R	M	V	G	G	I	G	R	F	Y	I	Q	M	C	T	E
A/duck/Vietnam/QN6798/2020	H5N6	2.3.4.4h	498	M	A	S	Q	G	T	K	R	S	Y	E	Q	M	E	T	G	G	E	R	Q	N	A	T	E	I	R	A	S	V	G	R	M	V	G	G	I	G	R	F	Y	I	Q	M	C	T	E
A/duck/Vietnam/QN6799/2020	H5N6	2.3.4.4h	498	M	A	S	Q	G	T	K	R	S	Y	E	Q	M	E	T	G	G	E	R	Q	N	A	T	E	I	R	A	S	V	G	R	M	V	G	G	I	G	R	F	Y	I	Q	M	C	T	E
A/duck/Vietnam/QN6800/2020	H5N6	2.3.4.4h	498	M	A	S	Q	G	T	K	R	S	Y	E	Q	M	E	T	G	G	E	R	Q	N	A	T	E	I	R	A	S	V	G	R	M	V	G	G	I	G	R	F	Y	I	Q	M	C	T	E
A/duck/Vietnam/QN6801/2020	H5N6	2.3.4.4h	498	M	A	S	Q	G	T	K	R	S	Y	E	Q	M	E	T	G	G	E	R	Q	N	A	T	E	I	R	A	S	V	G	R	M	V	G	G	I	G	R	F	Y	I	Q	M	C	T	E
A/duck/Vietnam/QN6803/2020	H3H5N2N6	2.3.4.4h	498	M	A	S	Q	G	T	K	R	S	Y	E	Q	M	E	T	G	G	E	R	Q	N	A	T	E	I	R	A	S	V	G	R	M	V	G	G	I	G	R	F	Y	I	Q	M	C	T	E
A/duck/Vietnam/QN6804/2020	H5N6	2.3.4.4h	498	M	A	S	Q	G	T	K	R	S	Y	E	Q	M	E	T	G	G	E	R	Q	N	A	T	E	I	R	A	S	V	G	R	M	V	G	G	I	G	R	F	Y	I	Q	M	C	T	E
A/duck/Vietnam/QN6805/2020	H5N6	2.3.4.4h	498	M	A	S	Q	G	T	K	R	S	Y	E	Q	M	E	T	G	G	E	R	Q	N	A	T	E	I	R	A	S	V	G	R	M	V	G	G	I	G	R	F	Y	I	Q	M	C	T	E
A/duck/Vietnam/QN6806/2020	H5N6	2.3.4.4h	498	M	A	S	Q	G	T	K	R	S	Y	E	Q	M	E	T	G	G	E	R	Q	N	A	T	E	I	R	A	S	V	G	R	M	V	G	G	I	G	R	F	Y	I	Q	M	C	T	E
A/duck/Vietnam/QN6807/2020	H3H5N2N6N8	2.3.4.4h	498	M	A	S	Q	G	T	K	R	S	Y	E	Q	M	E	T	G	G	E	R	Q	N	A	T	E	I	R	A	S	V	G	R	M	V	G	G	I	G	R	F	Y	I	Q	M	C	T	E
A/duck/Vietnam/QN6808/2020	H5N6	2.3.4.4h	498	M	A	S	Q	G	T	K	R	S	Y	E	Q	M	E	T	G	G	E	R	Q	N	A	T	E	I	R	A	S	V	G	R	M	V	G	G	I	G	R	F	Y	I	Q	M	C	T	E
A/duck/Vietnam/QN6809/2020	H3H5N6	2.3.4.4h	498	M	A	S	Q	G	T	K	R	S	Y	E	Q	M	E	T	G	G	E	R	Q	N	A	T	E	I	R	A	S	V	G	R	M	V	G	G	I	G	R	F	Y	I	Q	M	C	T	E
A/duck/Vietnam/HN5141/2018	H5N6	2.3.4.4g	498	M	A	S	Q	G	T	K	R	S	Y	E	Q	M	E	T	G	G	E	R	Q	N	A	T	E	I	R	A	S	V	G	R	M	V	G	G	I	G	R	F	Y	I	Q	M	C	T	E
A/duck/Vietnam/HN5142/2018	H5N6	2.3.4.4g	498	M	A	S	Q	G	T	K	R	S	Y	E	Q	M	E	T	G	G	E	R	Q	N	A	T	E	I	R	A	S	V	G	R	M	V	G	G	I	G	R	F	Y	I	Q	M	C	T	E
A/duck/Vietnam/HN5143/2018	H5N6	2.3.4.4g	498	M	A	S	Q	G	T	K	R	S	Y	E	Q	M	E	T	G	G	E	R	Q	N	A	T	E	I	R	A	S	V	G	R	M	V	G	G	I	G	R	F	Y	I	Q	M	C	T	E
A/duck/Vietnam/HN5144/2018	H5N6*	2.3.4.4g	498	M	A	S	Q	G	T	K	R	S	Y	E	Q	M	E	T	G	G	E	R	Q	N	A	T	E	I	R	A	S	V	G	R	M	V	G	G	I	G	R	F	Y	I	Q	M	C	T	E
A/duck/Vietnam/HN5145/2018	H5N6	2.3.4.4g	498	M	A	S	Q	G	T	K	R	S	Y	E	Q	M	E	T	G	G	E	R	Q	N	A	T	E	I	R	A	S	V	G	R	M	V	G	G	I	G	R	F	Y	I	Q	M	C	T	E
A/duck/Vietnam/HN5147/2018	H5N6	2.3.4.4g	498	M	A	S	Q	G	T	K	R	S	Y	E	Q	M	E	T	G	G	E	R	Q	N	A	T	E	I	R	A	S	V	G	R	M	V	G	G	I	G	R	F	Y	I	Q	M	C	T	E
A/duck/Vietnam/HN5148/2018	H5N6*	2.3.4.4g	498	M	A	S	Q	G	T	K	R	S	Y	E	Q	M	E	T	G	G	E	R	Q	N	A	T	E	I	R	A	S	V	G	R	M	V	G	G	I	G	R	F	Y	I	Q	M	C	T	E
A/duck/Vietnam/HN5149/2018	H5N6	2.3.4.4g	498	M	A	S	Q	G	T	K	R	S	Y	E	Q	M	E	T	G	G	E	R	Q	N	A	T	E	I	R	A	S	V	G	R	M	V	G	G	I	G	R	F	Y	I	Q	M	C	T	E
*Samples did not show 'mixed' HA sequences, but they did show 'mixed' N6 NA and mixed PB2, PB1, PA, and NS1 sequences.
[truncated: 452 more columns]

## Sheet: A_NA_N6
Supplemental Table 2: Consensus sequences of viral proteins isolated in this study.
			Protein Length	1	2	3	4	5	6	7	8	9	10	11	12	13	14	15	16	17	18	19	20	21	22	23	24	25	26	27	28	29	30	31	32	33	34	35	36	37	38	39	40	41	42	43	44	45	46
Virus	Subtype	Clade		1	2	3	4	5	6	7	8	9	10	11	12	13	14	15	16	17	18	19	20	21	22	23	24	25	26	27	28	29	30	31	32	33	34	35	36	37	38	39	40	41	42	43	44	45	46
A/muscovy-duck/Vietnam/HN4711/2018	H5N6	2.3.4.4h	459	M	N	P	N	Q	K	I	T	C	I	S	A	T	G	V	T	L	S	V	V	S	L	L	I	G	I	T	N	L	G	L	N	I	G	L	H	Y	K	V	S	D	S	T	N	I	N
A/muscovy-duck/Vietnam/HN4713/2018	H5N6	2.3.4.4h	459	M	N	P	N	Q	K	I	T	C	I	S	A	T	G	V	T	L	S	V	V	S	L	L	I	G	I	T	N	L	G	L	N	I	G	L	H	Y	K	V	S	D	S	T	N	I	N
A/muscovy-duck/Vietnam/HN4714/2018	H5N6	2.3.4.4h	459	M	N	P	N	Q	K	I	T	C	I	S	A	T	G	V	T	L	S	V	V	S	L	L	I	G	I	T	N	L	G	L	N	I	G	L	H	Y	K	V	S	D	S	T	N	I	N
A/muscovy-duck/Vietnam/HN4715/2018	H5N6	2.3.4.4h	459	M	N	P	N	Q	K	I	T	C	I	S	A	T	G	V	T	L	S	V	V	S	L	L	I	G	I	T	N	L	G	L	N	I	G	L	H	Y	K	V	S	D	S	T	N	I	N
A/muscovy-duck/Vietnam/HN4716/2018	H5N6	2.3.4.4h	459	M	N	P	N	Q	K	I	T	C	I	S	A	T	G	V	T	L	S	V	V	S	L	L	I	G	I	T	N	L	G	L	N	I	G	L	H	Y	K	V	S	D	S	T	N	I	N
A/muscovy-duck/Vietnam/HN4718/2018	H5N6	2.3.4.4h	459	M	N	P	N	Q	K	I	T	C	I	S	A	T	G	V	T	L	S	V	V	S	L	L	I	G	I	T	N	L	G	L	N	I	G	L	H	Y	K	V	S	D	S	T	N	I	N
A/muscovy-duck/Vietnam/HN4719/2018	H5N6	2.3.4.4h	459	M	N	P	N	Q	K	I	T	C	I	S	A	T	G	V	T	L	S	V	V	S	L	L	I	G	I	T	N	L	G	L	N	I	G	L	H	Y	K	V	S	D	S	T	N	I	N
A/muscovy-duck/Vietnam/HN4720/2018	H5N6	2.3.4.4h	459	M	N	P	N	Q	K	I	T	C	I	S	A	T	G	V	T	L	S	V	V	S	L	L	I	G	I	T	N	L	G	L	N	I	G	L	H	Y	K	V	S	D	S	T	N	I	N
A/duck/Vietnam/HN4721/2018	H5N6	2.3.4.4h	459	M	N	P	N	Q	K	I	T	C	I	S	A	T	G	V	T	L	S	V	V	S	L	L	I	G	I	T	N	L	G	L	N	I	G	L	H	Y	K	V	S	D	S	T	N	I	N
A/muscovy-duck/Vietnam/HN4856/2018	H5N6	2.3.4.4h	459	M	N	P	N	Q	K	I	T	C	I	S	A	T	G	V	T	L	S	V	V	S	L	L	I	G	I	T	N	L	G	L	N	I	G	L	H	Y	K	V	G	D	S	T	T	I	N
A/muscovy-duck/Vietnam/HN4857/2018	H5N6	2.3.4.4h	459	M	N	P	N	Q	K	I	T	C	I	S	A	T	G	V	T	L	S	V	V	S	L	L	I	G	I	T	N	L	G	L	N	I	G	L	H	Y	K	V	G	D	S	T	T	I	N
A/muscovy-duck/Vietnam/HN4858/2018	H5N6	2.3.4.4h	459	M	N	P	N	Q	K	I	T	C	I	S	A	T	G	V	T	L	S	V	V	S	L	L	I	G	I	T	N	L	G	L	N	I	G	L	H	Y	K	V	G	D	S	T	T	I	N
A/muscovy-duck/Vietnam/HN5046/2018	H5N6	2.3.4.4h	459	M	N	P	N	Q	K	I	T	C	I	S	A	T	G	V	T	L	S	V	V	S	L	L	I	G	I	T	N	L	G	L	N	I	G	L	H	Y	K	V	G	D	S	T	T	I	N
A/muscovy-duck/Vietnam/HN5047/2018	H5N6	2.3.4.4h	459	M	N	P	N	Q	K	I	T	C	I	S	A	T	G	V	T	L	S	V	V	S	L	L	I	G	I	T	N	L	G	L	N	I	G	L	H	Y	K	V	S	D	S	T	T	I	N
A/muscovy-duck/Vietnam/HN5048/2018	H5N6	2.3.4.4h	459	M	N	P	N	Q	K	I	T	C	I	S	A	T	G	V	T	L	S	V	V	S	L	L	I	G	I	T	N	L	G	L	N	I	G	L	H	Y	K	V	G	D	S	T	T	I	N
A/duck/Vietnam/HN5080/2018	H5N6	2.3.4.4h	459	M	N	P	N	Q	K	I	T	C	I	S	A	T	G	V	T	L	S	V	V	S	L	L	I	G	I	T	N	L	G	L	N	I	G	L	H	Y	K	V	G	D	S	T	T	I	N
A/muscovy-duck/Vietnam/HN5132/2018	H5N6	2.3.4.4h	459	M	N	P	N	Q	K	I	T	C	I	S	A	T	G	V	T	L	S	V	V	S	L	L	I	G	I	T	N	L	G	L	N	I	G	L	H	Y	K	V	G	D	S	T	T	I	N
A/muscovy-duck/Vietnam/HN5135/2018	H5N6	2.3.4.4h	459	M	N	P	N	Q	K	I	T	C	I	S	A	T	G	V	T	L	S	V	V	S	L	L	I	G	I	T	N	L	G	L	N	I	G	L	H	Y	K	V	G	D	S	T	T	I	N
A/muscovy-duck/Vietnam/HN5137/2018	H5N6	2.3.4.4h	459	M	N	P	N	Q	K	I	T	C	I	S	A	T	G	V	T	L	S	V	V	S	L	L	I	G	I	T	N	L	G	L	N	I	G	L	H	Y	K	V	G	D	S	T	T	I	N
A/muscovy-duck/Vietnam/HN5138/2018	H5N6	2.3.4.4h	459	M	N	P	N	Q	K	I	T	C	I	S	A	T	G	V	T	L	S	V	V	S	L	L	I	G	I	T	N	L	G	L	N	I	G	L	H	Y	K	V	G	D	S	T	T	I	N
A/muscovy-duck/Vietnam/HN5139/2018	H5N6	2.3.4.4h	459	M	N	P	N	Q	K	I	T	C	I	S	A	T	G	V	T	L	S	V	V	S	L	L	I	G	I	T	N	L	G	L	N	I	G	L	H	Y	K	V	G	D	S	T	T	I	N
A/muscovy-duck/Vietnam/HN5140/2018	H5H9N2N6	2.3.4.4h	459	M	N	P	N	Q	K	I	T	C	I	S	A	T	G	V	T	L	S	V	V	S	L	L	I	G	I	T	N	L	G	L	N	I	G	L	H	Y	K	V	G	D	S	T	T	I	N
A/muscovy-duck/Vietnam/HN5049/2018	H5N6	2.3.4.4h	459	M	N	P	N	Q	K	I	T	C	I	S	A	T	G	V	T	L	S	V	V	S	L	L	I	G	I	T	N	L	G	L	N	I	G	L	H	Y	K	V	G	D	S	T	T	I	N
A/duck/Vietnam/HN5150/2018	H5H6N6	2.3.4.4h	470	M	N	P	N	Q	K	I	T	C	I	S	A	T	G	V	T	L	S	V	V	S	L	L	T	G	I	A	N	L	G	L	N	I	G	L	H	Y	K	V	S	D	S	T	N	V	N
A/muscovy-duck/Vietnam/HN6029/2019	H5H6N6N8	2.3.4.4h	459	M	N	P	N	Q	K	I	T	C	I	S	A	T	G	V	T	L	S	V	V	S	L	L	I	G	I	T	N	L	G	L	N	I	G	L	H	Y	K	V	G	D	S	T	T	I	N
A/muscovy-duck/Vietnam/HN6111/2020	H5N6	2.3.4.4h	459	M	N	P	N	Q	K	I	T	C	I	S	A	T	G	V	T	L	S	V	V	S	L	L	I	G	I	T	N	L	G	L	N	I	G	L	H	Y	K	V	G	D	S	T	T	I	N
A/muscovy-duck/Vietnam/HN6113/2020	H5N6	2.3.4.4h	459	M	N	P	N	Q	K	I	T	C	I	S	A	T	G	V	T	L	S	V	V	S	L	L	I	G	I	T	N	L	G	L	N	I	G	L	H	Y	K	V	G	D	S	T	T	I	N
A/muscovy-duck/Vietnam/HN6114/2020	H5N6	2.3.4.4h	459	M	N	P	N	Q	K	I	T	C	I	S	A	T	G	V	T	L	S	V	V	S	L	L	I	G	I	T	N	L	G	L	N	I	G	L	H	Y	K	V	G	D	S	T	T	I	N
A/muscovy-duck/Vietnam/HN6115/2020	H5N6	2.3.4.4h	459	M	N	P	N	Q	K	I	T	C	I	S	A	T	G	V	T	L	S	V	V	S	L	L	I	G	I	T	N	L	G	L	N	I	G	L	H	Y	K	V	G	D	S	T	T	I	N
A/muscovy-duck/Vietnam/HN6119/2020	H5N6	2.3.4.4h	459	M	N	P	N	Q	K	I	T	C	I	S	A	T	G	V	T	L	S	V	V	S	L	L	I	G	I	T	N	L	G	L	N	I	G	L	H	Y	K	V	G	D	S	T	T	I	N
A/Muscovy duck/Vietnam/HN6120/2020	H5N6	2.3.4.4h	459	M	N	P	N	Q	K	I	T	C	I	S	A	T	G	V	T	L	S	V	V	S	L	L	I	G	I	T	N	L	G	L	N	I	G	L	H	Y	K	V	G	D	S	T	T	I	N
A/muscovy-duck/Vietnam/HN6606/2020	H5N6	2.3.4.4h	459	M	N	P	N	Q	R	I	T	C	I	S	A	T	G	V	T	L	S	V	V	S	L	L	I	G	I	T	N	L	G	L	N	I	G	L	H	Y	K	V	S	D	S	T	T	I	N
A/muscovy-duck/Vietnam/HN6607/2020	H5N6	2.3.4.4h	459	M	N	P	N	Q	R	I	T	C	I	S	A	T	G	V	T	L	S	V	V	S	L	L	I	G	I	T	N	L	G	L	N	I	G	L	H	Y	K	V	S	D	S	T	T	I	N
A/muscovy-duck/Vietnam/HN6608/2020	H5N6	2.3.4.4h	459	M	N	P	N	Q	R	I	T	C	I	S	A	T	G	V	T	L	S	V	V	S	L	L	I	G	I	T	N	L	G	L	N	I	G	L	H	Y	K	V	S	D	S	T	T	I	N
A/muscovy-duck/Vietnam/HN6609/2020	H5N6	2.3.4.4h	459	M	N	P	N	Q	R	I	T	C	I	S	A	T	G	V	T	L	S	V	V	S	L	L	I	G	I	T	N	L	G	L	N	I	G	L	H	Y	K	V	S	D	S	T	T	I	N
A/muscovy-duck/Vietnam/HN6610/2020	H5N6	2.3.4.4h	459	M	N	P	N	Q	R	I	T	C	I	S	A	T	G	V	T	L	S	V	V	S	L	L	I	G	I	T	N	L	G	L	N	I	G	L	H	Y	K	V	S	D	S	T	T	I	N
A/duck/Vietnam/HN6611/2020	H5N6	2.3.4.4h	459	M	N	P	N	Q	R	I	T	C	I	S	A	T	G	V	T	L	S	V	V	S	L	L	I	G	I	T	N	L	G	L	N	I	G	L	H	Y	K	V	S	D	S	T	T	I	N
A/muscovy-duck/Vietnam/HN6692/2020	H5N6	2.3.4.4h	459	M	N	P	N	Q	K	I	T	C	I	S	A	I	G	V	T	L	S	V	V	S	L	L	I	G	I	T	N	L	G	L	N	I	G	L	H	Y	K	V	G	D	S	T	T	I	N
A/muscovy-duck/Vietnam/HN6698/2020	H4H5N6	2.3.4.4h	470	M	N	P	N	Q	K	I	I	C	I	S	A	T	G	M	T	L	S	V	V	S	L	L	I	G	I	A	N	L	G	L	N	I	G	L	H	Y	K	V	G	D	T	P	D	V	N
A/muscovy-duck/Vietnam/HN6699/2020	H4H5N6	2.3.4.4h	459	M	N	P	N	Q	K	I	T	C	I	S	A	I	G	V	T	L	S	V	V	S	L	L	I	G	I	T	N	L	G	L	N	I	G	L	H	Y	K	V	G	D	S	T	T	I	N
A/muscovy-duck/Vietnam/HN6811/2020	H5H6N6	2.3.4.4h	470	M	N	P	N	Q	K	I	T	C	I	S	A	T	G	V	T	L	S	V	V	S	L	L	I	G	I	A	N	L	G	L	N	I	G	L	H	Y	K	V	S	D	S	T	N	V	N
A/muscovy-duck/Vietnam/HN6881/2021	H5N6	2.3.4.4h	459	M	N	P	N	Q	R	I	T	C	I	S	A	T	G	V	T	L	S	V	V	S	L	L	I	G	I	T	N	L	G	L	N	I	G	L	H	Y	K	V	S	D	S	T	T	I	N
A/muscovy-duck/Vietnam/HN6884/2021	H5N6	2.3.4.4h	459	M	N	P	N	Q	R	I	T	C	I	S	A	T	G	V	T	L	S	V	V	S	L	L	I	G	I	T	N	L	G	L	N	I	G	L	H	Y	K	V	S	D	S	T	T	I	N
A/muscovy-duck/Vietnam/HN6890/2021	H5N6	2.3.4.4h	459	M	N	P	N	Q	R	I	T	C	I	S	A	T	G	V	T	L	S	V	V	S	L	L	I	G	I	T	N	L	G	L	N	I	G	L	H	Y	K	V	S	D	S	T	T	I	N
A/duck/Vietnam/HN6893/2021	H5N6	2.3.4.4h	459	M	N	P	N	Q	R	I	T	C	I	S	A	T	G	V	T	L	S	V	V	S	L	L	I	G	I	T	N	L	G	L	N	I	G	L	H	Y	K	V	S	D	S	T	T	I	N
A/duck/Vietnam/HN6894/2021	H5N6	2.3.4.4h	459	M	N	P	N	Q	R	I	T	C	I	S	A	T	G	V	T	L	S	V	V	S	L	L	I	G	I	T	N	L	G	L	N	I	G	L	H	Y	K	V	S	D	S	T	T	I	N
A/duck/Vietnam/HN6896/2021	H5N6	2.3.4.4h	459	M	N	P	N	Q	R	I	T	C	I	S	A	T	G	V	T	L	S	V	V	S	L	L	I	G	I	T	N	L	G	L	N	I	G	L	H	Y	K	V	S	D	S	T	T	I	N
A/duck/Vietnam/HN6897/2021	H5N6	2.3.4.4h	459	M	N	P	N	Q	R	I	T	C	I	S	A	T	G	V	T	L	S	V	V	S	L	L	I	G	I	T	N	L	G	L	N	I	G	L	H	Y	K	V	S	D	S	T	T	I	N
A/duck/Vietnam/HN6898/2021	H5N6	2.3.4.4h	459	M	N	P	N	Q	R	I	T	C	I	S	A	T	G	V	T	L	S	V	V	S	L	L	I	G	I	T	N	L	G	L	N	I	G	L	H	Y	K	V	S	D	S	T	T	I	N
A/duck/Vietnam/QN6519/2020	H5N6	2.3.4.4h	459	M	N	P	N	Q	K	I	T	C	I	S	A	T	G	V	T	L	S	V	V	S	L	L	I	G	I	T	N	L	G	L	N	I	G	L	H	Y	K	V	G	D	P	T	T	I	N
A/duck/Vietnam/QN6658/2020	H5N6	2.3.4.4h	459	M	N	P	N	Q	K	I	T	C	I	S	A	I	G	V	T	L	S	V	V	S	L	L	I	G	I	T	N	L	G	L	N	I	G	L	H	Y	K	V	G	D	S	T	T	I	N
A/duck/Vietnam/QN6659/2020	H5N6	2.3.4.4h	459	M	N	P	N	Q	K	I	T	C	I	S	A	I	G	V	T	L	S	V	V	S	L	L	I	G	I	T	N	L	G	L	N	I	G	L	H	Y	K	V	G	D	S	T	T	I	N
A/duck/Vietnam/QN6660/2020	H5N6	2.3.4.4h	459	M	N	P	N	Q	K	I	T	C	I	S	A	I	G	V	T	L	S	V	V	S	L	L	I	G	I	T	N	L	G	L	N	I	G	L	H	Y	K	V	G	D	S	T	T	I	N
A/duck/Vietnam/QN6661/2020	H5N6	2.3.4.4h	459	M	N	P	N	Q	K	I	T	C	I	S	A	I	G	V	T	L	S	V	V	S	L	L	I	G	I	T	N	L	G	L	N	I	G	L	H	Y	K	V	G	D	S	T	T	I	N
A/duck/Vietnam/QN6730/2020	H5N6	2.3.4.4h	459	M	N	P	N	Q	K	I	T	C	I	S	A	I	G	V	T	L	S	V	V	S	L	L	I	G	I	T	N	L	G	L	N	I	G	L	H	Y	K	M	G	D	S	T	T	I	N
A/duck/Vietnam/QN6736/2020	H4H5N2N6	2.3.4.4h	459	M	N	P	N	Q	K	I	T	C	I	S	A	T	G	V	T	L	S	V	V	S	L	L	I	G	I	T	N	L	G	L	N	I	G	L	H	Y	K	V	G	D	S	E	T	I	N
A/duck/Vietnam/QN6739/2020	H5N6	2.3.4.4h	459	M	N	P	N	Q	K	I	T	C	I	S	A	I	G	V	T	L	S	V	V	S	L	L	I	G	I	T	N	L	G	L	N	I	G	L	H	Y	K	M	G	D	S	T	T	I	N
A/duck/Vietnam/QN6796/2020	H5N6	2.3.4.4h	459	M	N	P	N	Q	K	I	T	C	I	S	A	I	G	V	T	L	S	V	V	S	L	L	I	G	I	T	N	L	G	L	N	I	G	L	H	Y	K	V	G	D	S	T	T	I	N
A/duck/Vietnam/QN6798/2020	H5N6	2.3.4.4h	459	M	N	P	N	Q	K	I	T	C	I	S	A	I	G	V	T	L	S	V	V	S	L	L	I	G	I	T	N	L	G	L	N	I	G	L	H	Y	K	V	G	D	S	T	T	I	N
A/duck/Vietnam/QN6799/2020	H5N6	2.3.4.4h	459	M	N	P	N	Q	K	I	T	C	I	S	A	I	G	V	T	L	S	V	V	S	L	L	I	G	I	T	N	L	G	L	N	I	G	L	H	Y	K	V	G	D	S	T	T	I	N
A/duck/Vietnam/QN6800/2020	H5N6	2.3.4.4h	459	M	N	P	N	Q	K	I	T	C	I	S	A	I	G	V	T	L	S	V	V	S	L	L	I	G	I	T	N	L	G	L	N	I	G	L	H	Y	K	V	G	D	S	T	T	I	N
A/duck/Vietnam/QN6801/2020	H5N6	2.3.4.4h	459	M	N	P	N	Q	K	I	T	C	I	S	A	I	G	V	T	L	S	V	V	S	L	L	I	G	I	T	N	L	G	L	N	I	G	L	H	Y	K	V	G	D	S	T	T	I	N
A/duck/Vietnam/QN6803/2020	H3H5N2N6	2.3.4.4h	459	M	N	P	N	Q	K	I	T	C	I	S	A	I	G	V	T	L	S	V	V	S	L	L	I	G	I	T	N	L	G	L	N	I	G	L	H	Y	K	V	G	D	S	T	T	I	N
A/duck/Vietnam/QN6804/2020	H5N6	2.3.4.4h	459	M	N	P	N	Q	K	I	T	C	I	S	A	I	G	V	T	L	S	V	V	S	L	L	I	G	I	T	N	L	G	L	N	I	G	L	H	Y	K	V	G	D	S	T	T	I	N
A/duck/Vietnam/QN6805/2020	H5N6	2.3.4.4h	459	M	N	P	N	Q	K	I	T	C	I	S	A	I	G	V	T	L	S	V	V	S	L	L	I	G	I	T	N	L	G	L	N	I	G	L	H	Y	K	V	G	D	S	T	T	I	N
A/duck/Vietnam/QN6806/2020	H5N6	2.3.4.4h	459	M	N	P	N	Q	K	I	T	C	I	S	A	I	G	V	T	L	S	V	V	S	L	L	I	G	I	T	N	L	G	L	N	I	G	L	H	Y	K	V	G	D	S	T	T	I	N
A/duck/Vietnam/QN6807/2020	H3H5N2N6N8	2.3.4.4h	459	M	N	P	N	Q	K	I	T	C	I	S	A	I	G	V	T	L	S	V	V	S	L	L	I	G	I	T	N	L	G	L	N	I	G	L	H	Y	K	V	G	D	S	T	T	I	N
A/duck/Vietnam/QN6808/2020	H5N6	2.3.4.4h	459	M	N	P	N	Q	K	I	T	C	I	S	A	I	G	V	T	L	S	V	V	S	L	L	I	G	I	T	N	L	G	L	N	I	G	L	H	Y	K	V	G	D	S	T	T	I	N
A/duck/Vietnam/QN6809/2020	H3H5N6	2.3.4.4h	459	M	N	P	N	Q	K	I	T	C	I	S	A	I	G	V	T	L	S	V	V	S	L	L	I	G	I	T	N	L	G	L	N	I	G	L	H	Y	K	V	G	D	S	T	T	I	N
A/duck/Vietnam/HN5141/2018	H5N6	2.3.4.4g	459	M	N	P	N	Q	K	I	T	C	I	S	A	T	G	V	T	L	S	V	V	S	L	L	L	G	I	A	N	L	S	L	N	I	G	L	H	Y	K	V	S	D	P	T	T	I	N
A/duck/Vietnam/HN5142/2018	H5N6	2.3.4.4g	459	M	N	P	N	Q	K	I	T	C	I	S	A	T	G	V	T	L	S	V	V	S	L	L	L	G	I	A	N	L	S	L	N	I	G	L	H	Y	K	V	S	D	P	T	T	I	N
A/duck/Vietnam/HN5143/2018	H5N6	2.3.4.4g	459	M	N	P	N	Q	K	I	T	C	I	S	A	T	G	V	T	L	S	V	V	S	L	L	L	G	I	A	N	L	S	L	N	I	G	L	H	Y	K	V	S	D	P	T	T	I	N
A/duck/Vietnam/HN5144/2018	H5N6*	2.3.4.4g	459	M	N	P	N	Q	K	I	T	C	I	S	A	T	G	V	T	L	S	V	V	S	L	L	L	G	I	A	N	L	S	L	N	I	G	L	H	Y	K	V	S	D	P	T	T	I	N
A/duck/Vietnam/HN5145/2018	H5N6	2.3.4.4g	459	M	N	P	N	Q	K	I	T	C	I	S	A	T	G	V	T	L	S	V	V	S	L	L	V	G	I	A	N	L	S	L	N	I	G	L	H	Y	K	V	S	D	P	T	T	I	N
A/duck/Vietnam/HN5147/2018	H5N6	2.3.4.4g	459	M	N	P	N	Q	K	I	T	C	I	S	A	T	G	V	T	L	S	V	V	S	L	L	V	G	I	A	N	L	S	L	N	I	G	L	H	Y	K	V	S	D	P	T	T	I	N
A/duck/Vietnam/HN5148/2018	H5N6*	2.3.4.4g	459	M	N	P	N	Q	K	I	T	C	I	S	A	T	G	V	T	L	S	V	V	S	L	L	L	G	I	A	N	L	S	L	N	I	G	L	H	Y	K	V	S	D	P	T	T	I	N
A/duck/Vietnam/HN5149/2018	H5N6	2.3.4.4g	459	M	N	P	N	Q	K	I	T	C	I	S	A	T	G	V	T	L	S	V	V	S	L	L	V	G	I	A	N	L	S	L	N	I	G	L	H	Y	K	V	S	D	P	T	T	I	N
*Samples did not show 'mixed' HA sequences, but they did show 'mixed' N6 NA and mixed PB2, PB1, PA, and NS1 sequences.
[truncated: 424 more columns]

## Sheet: A_M1
Supplemental Table 2: Consensus sequences of viral proteins isolated in this study.
Virus	Subtype	Clade	Protein Length	1	2	3	4	5	6	7	8	9	10	11	12	13	14	15	16	17	18	19	20	21	22	23	24	25	26	27	28	29	30	31	32	33	34	35	36	37	38	39	40	41	42	43	44	45	46
A/muscovy-duck/Vietnam/HN4711/2018	H5N6	2.3.4.4h	252	M	S	L	L	T	E	V	E	T	Y	V	L	S	I	I	P	S	G	P	L	K	A	E	I	A	Q	K	L	E	D	V	F	A	G	K	N	A	D	L	E	A	L	M	E	W	L
A/muscovy-duck/Vietnam/HN4713/2018	H5N6	2.3.4.4h	252	M	S	L	L	T	E	V	E	T	Y	V	L	S	I	I	P	S	G	P	L	K	A	E	I	A	Q	K	L	E	D	V	F	A	G	K	N	A	D	L	E	A	L	M	E	W	L
A/muscovy-duck/Vietnam/HN4714/2018	H5N6	2.3.4.4h	252	M	S	L	L	T	E	V	E	T	Y	V	L	S	I	I	P	S	G	P	L	K	A	E	I	A	Q	K	L	E	D	V	F	A	G	K	N	A	D	L	E	A	L	M	E	W	L
A/muscovy-duck/Vietnam/HN4715/2018	H5N6	2.3.4.4h	252	M	S	L	L	T	E	V	E	T	Y	V	L	S	I	I	P	S	G	P	L	K	A	E	I	A	Q	K	L	E	D	V	F	A	G	K	N	A	D	L	E	A	L	M	E	W	L
A/muscovy-duck/Vietnam/HN4716/2018	H5N6	2.3.4.4h	252	M	S	L	L	T	E	V	E	T	Y	V	L	S	I	I	P	S	G	P	L	K	A	E	I	A	Q	K	L	E	D	V	F	A	G	K	N	A	D	L	E	A	L	M	E	W	L
A/muscovy-duck/Vietnam/HN4718/2018	H5N6	2.3.4.4h	252	M	S	L	L	T	E	V	E	T	Y	V	L	S	I	I	P	S	G	P	L	K	A	E	I	A	Q	K	L	E	D	V	F	A	G	K	N	A	D	L	E	A	L	M	E	W	L
A/muscovy-duck/Vietnam/HN4719/2018	H5N6	2.3.4.4h	252	M	S	L	L	T	E	V	E	T	Y	V	L	S	I	I	P	S	G	P	L	K	A	E	I	A	Q	K	L	E	D	V	F	A	G	K	N	A	D	L	E	A	L	M	E	W	L
A/muscovy-duck/Vietnam/HN4720/2018	H5N6	2.3.4.4h	252	M	S	L	L	T	E	V	E	T	Y	V	L	S	I	I	P	S	G	P	L	K	A	E	I	A	Q	K	L	E	D	V	F	A	G	K	N	A	D	L	E	A	L	M	E	W	L
A/duck/Vietnam/HN4721/2018	H5N6	2.3.4.4h	252	M	S	L	L	T	E	V	E	T	Y	V	L	S	I	I	P	S	G	P	L	K	A	E	I	A	Q	K	L	E	D	V	F	A	G	K	N	A	D	L	E	A	L	M	E	W	L
A/muscovy-duck/Vietnam/HN4856/2018	H5N6	2.3.4.4h	252	M	S	L	L	T	E	V	E	T	Y	V	L	S	I	I	P	S	G	P	L	K	A	E	I	A	Q	K	L	E	D	V	F	A	G	K	N	A	D	L	E	A	L	M	E	W	L
A/muscovy-duck/Vietnam/HN4857/2018	H5N6	2.3.4.4h	252	M	S	L	L	T	E	V	E	T	Y	V	L	S	I	I	P	S	G	P	L	K	A	E	I	A	Q	K	L	E	D	V	F	A	G	K	N	A	D	L	E	A	L	M	E	W	L
A/muscovy-duck/Vietnam/HN4858/2018	H5N6	2.3.4.4h	252	M	S	L	L	T	E	V	E	T	Y	V	L	S	I	I	P	S	G	P	L	K	A	E	I	A	Q	K	L	E	D	V	F	A	G	K	N	A	D	L	E	A	L	M	E	W	L
A/muscovy-duck/Vietnam/HN5046/2018	H5N6	2.3.4.4h	252	M	S	L	L	T	E	V	E	T	Y	V	L	S	I	I	P	S	G	P	L	K	A	E	I	A	Q	K	L	E	D	V	F	A	G	K	N	A	D	L	E	A	L	M	E	W	L
A/muscovy-duck/Vietnam/HN5047/2018	H5N6	2.3.4.4h	252	M	S	L	L	T	E	V	E	T	Y	V	L	S	I	I	P	S	G	P	L	K	A	E	I	A	Q	K	L	E	D	V	F	A	G	K	N	A	D	L	E	A	L	M	E	W	L
A/muscovy-duck/Vietnam/HN5048/2018	H5N6	2.3.4.4h	252	M	S	L	L	T	E	V	E	T	Y	V	L	S	I	I	P	S	G	P	L	K	A	E	I	A	Q	K	L	E	D	V	F	A	G	K	N	A	D	L	E	A	L	M	E	W	L
A/duck/Vietnam/HN5080/2018	H5N6	2.3.4.4h	252	M	S	L	L	T	E	V	E	T	Y	V	L	S	I	I	P	S	G	P	L	K	A	E	I	A	Q	K	L	E	D	V	F	A	G	K	N	A	D	L	E	A	L	M	E	W	L
A/muscovy-duck/Vietnam/HN5132/2018	H5N6	2.3.4.4h	252	M	S	L	L	T	E	V	E	T	Y	V	L	S	I	I	P	S	G	P	L	K	A	E	I	A	Q	K	L	E	D	V	F	A	G	K	N	A	D	L	E	A	L	M	E	W	L
A/muscovy-duck/Vietnam/HN5135/2018	H5N6	2.3.4.4h	252	M	S	L	L	T	E	V	E	T	Y	V	L	S	I	I	P	S	G	P	L	K	A	E	I	A	Q	K	L	E	D	V	F	A	G	K	N	A	D	L	E	A	L	M	E	W	L
A/muscovy-duck/Vietnam/HN5137/2018	H5N6	2.3.4.4h	252	M	S	L	L	T	E	V	E	T	Y	V	L	S	I	I	P	S	G	P	L	K	A	E	I	A	Q	K	L	E	D	V	F	A	G	K	N	A	D	L	E	A	L	M	E	W	L
A/muscovy-duck/Vietnam/HN5138/2018	H5N6	2.3.4.4h	252	M	S	L	L	T	E	V	E	T	Y	V	L	S	I	I	P	S	G	P	L	K	A	E	I	A	Q	K	L	E	D	V	F	A	G	K	N	A	D	L	E	A	L	M	E	W	L
A/muscovy-duck/Vietnam/HN5139/2018	H5N6	2.3.4.4h	252	M	S	L	L	T	E	V	E	T	Y	V	L	S	I	I	P	S	G	P	L	K	A	E	I	A	Q	K	L	E	D	V	F	A	G	K	N	A	D	L	E	A	L	M	E	W	L
A/muscovy-duck/Vietnam/HN5140/2018	H5H9N2N6	2.3.4.4h	252	M	S	L	L	T	E	V	E	T	Y	V	L	S	I	I	P	S	G	P	L	K	A	E	I	A	Q	R	L	E	D	V	F	A	G	K	N	A	D	L	E	A	L	M	E	W	L
A/muscovy-duck/Vietnam/HN5049/2018	H5N6	2.3.4.4h	252	M	S	L	L	T	E	V	E	T	Y	V	L	S	I	I	P	S	G	P	L	K	A	E	I	A	Q	K	L	E	D	V	F	A	G	K	N	A	D	L	E	A	L	M	E	W	L
A/duck/Vietnam/HN5150/2018	H5H6N6	2.3.4.4h	252	M	S	L	L	T	E	V	E	T	Y	V	L	S	I	I	P	S	G	P	L	K	A	E	I	A	Q	R	L	E	D	V	F	A	G	K	N	T	D	L	E	A	L	M	E	W	L
A/muscovy-duck/Vietnam/HN6029/2019	H5H6N6N8	2.3.4.4h	252	M	S	L	L	T	E	V	E	T	Y	V	L	S	I	V	P	S	G	P	L	K	A	E	I	A	Q	R	L	E	D	V	F	A	G	K	N	T	D	L	E	A	L	M	E	W	L
A/muscovy-duck/Vietnam/HN6111/2020	H5N6	2.3.4.4h	252	M	S	L	L	T	E	V	E	T	Y	V	L	S	I	I	P	S	G	P	L	K	A	E	I	A	Q	K	L	E	D	V	F	A	G	K	N	A	D	L	E	A	L	M	E	W	L
A/muscovy-duck/Vietnam/HN6113/2020	H5N6	2.3.4.4h	252	M	S	L	L	T	E	V	E	T	Y	V	L	S	I	I	P	S	G	P	L	K	A	E	I	A	Q	K	L	E	D	V	F	A	G	K	N	A	D	L	E	A	L	M	E	W	L
A/muscovy-duck/Vietnam/HN6114/2020	H5N6	2.3.4.4h	252	M	S	L	L	T	E	V	E	T	Y	V	L	S	I	I	P	S	G	P	L	K	A	E	I	A	Q	K	L	E	D	V	F	A	G	K	N	A	D	L	E	A	L	M	E	W	L
A/muscovy-duck/Vietnam/HN6115/2020	H5N6	2.3.4.4h	252	M	S	L	L	T	E	V	E	T	Y	V	L	S	I	I	P	S	G	P	L	K	A	E	I	A	Q	K	L	E	D	V	F	A	G	K	N	A	D	L	E	A	L	M	E	W	L
A/muscovy-duck/Vietnam/HN6119/2020	H5N6	2.3.4.4h	252	M	S	L	L	T	E	V	E	T	Y	V	L	S	I	I	P	S	G	P	L	K	A	E	I	A	Q	K	L	E	D	V	F	A	G	K	N	A	D	L	E	A	L	M	E	W	L
A/muscovy-duck/Vietnam/HN6120/2020	H5N6	2.3.4.4h	252	M	S	L	L	T	E	V	E	T	Y	V	L	S	I	I	P	S	G	P	L	K	A	E	I	A	Q	K	L	E	D	V	F	A	G	K	N	A	D	L	E	A	L	M	E	W	L
A/muscovy-duck/Vietnam/HN6606/2020	H5N6	2.3.4.4h	252	M	S	L	L	T	E	V	E	T	Y	V	L	S	I	I	P	S	G	P	L	K	A	E	I	A	Q	K	L	E	D	V	F	A	G	K	N	A	D	L	E	A	L	M	E	W	L
A/muscovy-duck/Vietnam/HN6607/2020	H5N6	2.3.4.4h	252	M	S	L	L	T	E	V	E	T	Y	V	L	S	I	I	P	S	G	P	L	K	A	E	I	A	Q	K	L	E	D	V	F	A	G	K	N	A	D	L	E	A	L	M	E	W	L
A/muscovy-duck/Vietnam/HN6608/2020	H5N6	2.3.4.4h	252	M	S	L	L	T	E	V	E	T	Y	V	L	S	I	I	P	S	G	P	L	K	A	E	I	A	Q	K	L	E	D	V	F	A	G	K	N	A	D	L	E	A	L	M	E	W	L
A/muscovy-duck/Vietnam/HN6609/2020	H5N6	2.3.4.4h	252	M	S	L	L	T	E	V	E	T	Y	V	L	S	I	I	P	S	G	P	L	K	A	E	I	A	Q	K	L	E	D	V	F	A	G	K	N	A	D	L	E	A	L	M	E	W	L
A/muscovy-duck/Vietnam/HN6610/2020	H5N6	2.3.4.4h	252	M	S	L	L	T	E	V	E	T	Y	V	L	S	I	I	P	S	G	P	L	K	A	E	I	A	Q	K	L	E	D	V	F	A	G	K	N	A	D	L	E	A	L	M	E	W	L
A/duck/Vietnam/HN6611/2020	H5N6	2.3.4.4h	252	M	S	L	L	T	E	V	E	T	Y	V	L	S	I	I	P	S	G	P	L	K	A	E	I	A	Q	K	L	E	D	V	F	A	G	K	N	A	D	L	E	A	L	M	E	W	L
A/muscovy-duck/Vietnam/HN6692/2020	H5N6	2.3.4.4h	252	M	S	L	L	T	E	V	E	T	Y	V	L	S	I	I	P	S	G	P	L	K	A	E	I	A	Q	K	L	E	D	V	F	A	G	K	N	A	D	L	E	A	L	M	E	W	L
A/muscovy-duck/Vietnam/HN6698/2020	H4H5N6	2.3.4.4h	252	M	S	L	L	T	E	V	E	T	Y	V	L	S	I	V	P	S	G	P	L	K	A	E	I	A	Q	R	L	E	D	V	F	A	G	K	N	T	D	L	E	A	L	M	E	W	L
A/muscovy-duck/Vietnam/HN6699/2020	H4H5N6	2.3.4.4h	252	M	S	L	L	T	E	V	E	T	Y	V	L	S	I	I	P	S	G	P	L	K	A	E	I	A	Q	K	L	E	D	V	F	A	G	K	N	A	D	L	E	A	L	M	E	W	L
A/muscovy-duck/Vietnam/HN6811/2020	H5H6N6	2.3.4.4h	252	M	S	L	L	T	E	V	E	T	Y	V	L	S	I	I	P	S	G	P	L	K	A	E	I	A	Q	R	L	E	D	V	F	A	G	K	N	T	D	L	E	A	L	M	E	W	L
A/muscovy-duck/Vietnam/HN6881/2021	H5N6	2.3.4.4h	252	M	S	L	L	T	E	V	E	T	Y	V	L	S	I	I	P	S	G	P	L	K	A	E	I	A	Q	K	L	E	D	V	F	A	G	K	N	A	D	L	E	A	L	M	E	W	L
A/muscovy-duck/Vietnam/HN6884/2021	H5N6	2.3.4.4h	252	M	S	L	L	T	E	V	E	T	Y	V	L	S	I	I	P	S	G	P	L	K	A	E	I	A	Q	K	L	E	D	V	F	A	G	K	N	A	D	L	E	A	L	M	E	W	L
A/muscovy-duck/Vietnam/HN6890/2021	H5N6	2.3.4.4h	252	M	S	L	L	T	E	V	E	T	Y	V	L	S	I	I	P	S	G	P	L	K	A	E	I	A	Q	K	L	E	D	V	F	A	G	K	N	A	D	L	E	A	L	M	E	W	L
A/duck/Vietnam/HN6893/2021	H5N6	2.3.4.4h	252	M	S	L	L	T	E	V	E	T	Y	V	L	S	I	I	P	S	G	P	L	K	A	E	I	A	Q	K	L	E	D	V	F	A	G	K	N	A	D	L	E	A	L	M	E	W	L
A/duck/Vietnam/HN6894/2021	H5N6	2.3.4.4h	252	M	S	L	L	T	E	V	E	T	Y	V	L	S	I	I	P	S	G	P	L	K	A	E	I	A	Q	K	L	E	D	V	F	A	G	K	N	A	D	L	E	A	L	M	E	W	L
A/duck/Vietnam/HN6896/2021	H5N6	2.3.4.4h	252	M	S	L	L	T	E	V	E	T	Y	V	L	S	I	I	P	S	G	P	L	K	A	E	I	A	Q	K	L	E	D	V	F	A	G	K	N	A	D	L	E	A	L	M	E	W	L
A/duck/Vietnam/HN6897/2021	H5N6	2.3.4.4h	252	M	S	L	L	T	E	V	E	T	Y	V	L	S	I	I	P	S	G	P	L	K	A	E	I	A	Q	K	L	E	D	V	F	A	G	K	N	A	D	L	E	A	L	M	E	W	L
A/duck/Vietnam/HN6898/2021	H5N6	2.3.4.4h	252	M	S	L	L	T	E	V	E	T	Y	V	L	S	I	I	P	S	G	P	L	K	A	E	I	A	Q	K	L	E	D	V	F	A	G	K	N	A	D	L	E	A	L	M	E	W	L
A/duck/Vietnam/QN6519/2020	H5N6	2.3.4.4h	252	M	S	L	L	T	E	V	E	T	Y	V	L	S	I	I	P	S	G	P	L	K	A	E	I	A	Q	K	L	E	D	V	F	A	G	K	N	A	D	L	E	A	L	M	E	W	L
A/duck/Vietnam/QN6658/2020	H5N6	2.3.4.4h	252	M	S	L	L	T	E	V	E	T	Y	V	L	S	I	I	P	S	G	P	L	K	A	E	I	A	Q	K	L	E	D	V	F	A	G	K	N	A	D	L	E	A	L	M	E	W	L
A/duck/Vietnam/QN6659/2020	H5N6	2.3.4.4h	252	M	S	L	L	T	E	V	E	T	Y	V	L	S	I	I	P	S	G	P	L	K	A	E	I	A	Q	K	L	E	D	V	F	A	G	K	N	A	D	L	E	A	L	M	E	W	L
A/duck/Vietnam/QN6660/2020	H5N6	2.3.4.4h	252	M	S	L	L	T	E	V	E	T	Y	V	L	S	I	I	P	S	G	P	L	K	A	E	I	A	Q	K	L	E	D	V	F	A	G	K	N	A	D	L	E	A	L	M	E	W	L
A/duck/Vietnam/QN6661/2020	H5N6	2.3.4.4h	252	M	S	L	L	T	E	V	E	T	Y	V	L	S	I	I	P	S	G	P	L	K	A	E	I	A	Q	K	L	E	D	V	F	A	G	K	N	A	D	L	E	A	L	M	E	W	L
A/duck/Vietnam/QN6730/2020	H5N6	2.3.4.4h	252	M	S	L	L	T	E	V	E	T	Y	V	L	S	I	I	P	S	G	P	L	K	A	E	I	A	Q	K	L	E	D	V	F	A	G	K	N	A	D	L	E	A	L	M	E	W	L
A/duck/Vietnam/QN6736/2020	H4H5N2N6	2.3.4.4h	252	M	S	L	L	T	E	V	E	T	Y	V	L	S	I	I	P	S	G	P	L	K	A	E	I	A	Q	K	L	E	D	V	F	A	G	K	N	A	D	L	E	A	L	M	E	W	L
A/duck/Vietnam/QN6739/2020	H5N6	2.3.4.4h	252	M	S	L	L	T	E	V	E	T	Y	V	L	S	I	I	P	S	G	P	L	K	A	E	I	A	Q	K	L	E	D	V	F	A	G	K	N	A	D	L	E	A	L	M	E	W	L
A/duck/Vietnam/QN6796/2020	H5N6	2.3.4.4h	252	M	S	L	L	T	E	V	E	T	Y	V	L	S	I	I	P	S	G	P	L	K	A	E	I	A	Q	K	L	E	D	V	F	A	G	K	N	A	D	L	E	A	L	M	E	W	L
A/duck/Vietnam/QN6798/2020	H5N6	2.3.4.4h	252	M	S	L	L	T	E	V	E	T	Y	V	L	S	I	I	P	S	G	P	L	K	A	E	I	A	Q	K	L	E	D	V	F	A	G	K	N	A	D	L	E	A	L	M	E	W	L
A/duck/Vietnam/QN6799/2020	H5N6	2.3.4.4h	252	M	S	L	L	T	E	V	E	T	Y	V	L	S	I	I	P	S	G	P	L	K	A	E	I	A	Q	K	L	E	D	V	F	A	G	K	N	A	D	L	E	A	L	M	E	W	L
A/duck/Vietnam/QN6800/2020	H5N6	2.3.4.4h	252	M	S	L	L	T	E	V	E	T	Y	V	L	S	I	I	P	S	G	P	L	K	A	E	I	A	Q	K	L	E	D	V	F	A	G	K	N	A	D	L	E	A	L	M	E	W	L
A/duck/Vietnam/QN6801/2020	H5N6	2.3.4.4h	252	M	S	L	L	T	E	V	E	T	Y	V	L	S	I	I	P	S	G	P	L	K	A	E	I	A	Q	K	L	E	D	V	F	A	G	K	N	A	D	L	E	A	L	M	E	W	L
A/duck/Vietnam/QN6803/2020	H3H5N2N6	2.3.4.4h	252	M	S	L	L	T	E	V	E	T	Y	V	L	S	I	V	P	S	G	P	L	K	A	E	I	A	Q	R	L	E	D	V	F	A	G	K	N	T	D	L	E	A	L	M	E	W	L
A/duck/Vietnam/QN6804/2020	H5N6	2.3.4.4h	252	M	S	L	L	T	E	V	E	T	Y	V	L	S	I	I	P	S	G	P	L	K	A	E	I	A	Q	K	L	E	D	V	F	A	G	K	N	A	D	L	E	A	L	M	E	W	L
A/duck/Vietnam/QN6805/2020	H5N6	2.3.4.4h	252	M	S	L	L	T	E	V	E	T	Y	V	L	S	I	I	P	S	G	P	L	K	A	E	I	A	Q	K	L	E	D	V	F	A	G	K	N	A	D	L	E	A	L	M	E	W	L
A/duck/Vietnam/QN6806/2020	H5N6	2.3.4.4h	252	M	S	L	L	T	E	V	E	T	Y	V	L	S	I	I	P	S	G	P	L	K	A	E	I	A	Q	K	L	E	D	V	F	A	G	K	N	A	D	L	E	A	L	M	E	W	L
A/duck/Vietnam/QN6807/2020	H3H5N2N6N8	2.3.4.4h	252	M	S	L	L	T	E	V	E	T	Y	V	L	S	I	V	P	S	G	P	L	K	A	E	I	A	Q	R	L	E	D	V	F	A	G	K	N	T	D	L	E	A	L	M	E	W	L
A/duck/Vietnam/QN6808/2020	H5N6	2.3.4.4h	252	M	S	L	L	T	E	V	E	T	Y	V	L	S	I	I	P	S	G	P	L	K	A	E	I	A	Q	K	L	E	D	V	F	A	G	K	N	A	D	L	E	A	L	M	E	W	L
A/duck/Vietnam/QN6809/2020	H3H5N6	2.3.4.4h	252	M	S	L	L	T	E	V	E	T	Y	V	L	S	I	I	P	S	G	P	L	K	A	E	I	A	Q	K	L	E	D	V	F	A	G	K	N	A	D	L	E	A	L	M	E	W	L
A/duck/Vietnam/HN5141/2018	H5N6	2.3.4.4g	252	M	S	L	L	T	E	V	E	T	Y	V	L	S	I	I	P	S	G	P	L	K	A	E	I	A	Q	K	L	E	D	V	F	A	G	K	N	A	D	L	E	A	L	M	E	W	L
A/duck/Vietnam/HN5142/2018	H5N6	2.3.4.4g	252	M	S	L	L	T	E	V	E	T	Y	V	L	S	I	I	P	S	G	P	L	K	A	E	I	A	Q	K	L	E	D	V	F	A	G	K	N	A	D	L	E	A	L	M	E	W	L
A/duck/Vietnam/HN5143/2018	H5N6	2.3.4.4g	252	M	S	L	L	T	E	V	E	T	Y	V	L	S	I	I	P	S	G	P	L	K	A	E	I	A	Q	K	L	E	D	V	F	A	G	K	N	A	D	L	E	A	L	M	E	W	L
A/duck/Vietnam/HN5144/2018	H5N6*	2.3.4.4g	252	M	S	L	L	T	E	V	E	T	Y	V	L	S	I	I	P	S	G	P	L	K	A	E	I	A	Q	K	L	E	D	V	F	A	G	K	N	A	D	L	E	A	L	M	E	W	L
A/duck/Vietnam/HN5145/2018	H5N6	2.3.4.4g	252	M	S	L	L	T	E	V	E	T	Y	V	L	S	I	I	P	S	G	P	L	K	A	E	I	A	Q	K	L	E	D	V	F	A	G	K	N	A	D	L	E	A	L	M	E	W	L
A/duck/Vietnam/HN5147/2018	H5N6	2.3.4.4g	252	M	S	L	L	T	E	V	E	T	Y	V	L	S	I	I	P	S	G	P	L	K	A	E	I	A	Q	K	L	E	D	V	F	A	G	K	N	A	D	L	E	A	L	M	E	W	L
A/duck/Vietnam/HN5148/2018	H5N6*	2.3.4.4g	252	M	S	L	L	T	E	V	E	T	Y	V	L	S	I	I	P	S	G	P	L	K	A	E	I	A	Q	K	L	E	D	V	F	A	G	K	N	A	D	L	E	A	L	M	E	W	L
A/duck/Vietnam/HN5149/2018	H5N6	2.3.4.4g	252	M	S	L	L	T	E	V	E	T	Y	V	L	S	I	I	P	S	G	P	L	K	A	E	I	A	Q	K	L	E	D	V	F	A	G	K	N	A	D	L	E	A	L	M	E	W	L
*Samples did not show 'mixed' HA sequences, but they did show 'mixed' N6 NA and mixed PB2, PB1, PA, and NS1 sequences.
[truncated: 206 more columns]

## Sheet: A_M2
Supplemental Table 2: Consensus sequences of viral proteins isolated in this study.
Virus	Subtype	Clade	Protein Length	1	2	3	4	5	6	7	8	9	10	11	12	13	14	15	16	17	18	19	20	21	22	23	24	25	26	27	28	29	30	31	32	33	34	35	36	37	38	39	40	41	42	43	44	45	46
A/muscovy-duck/Vietnam/HN4711/2018	H5N6	2.3.4.4h	97	M	S	L	L	T	E	V	E	T	P	T	R	N	G	W	E	C	R	C	S	D	S	S	D	P	L	V	V	A	A	S	I	I	G	I	L	H	L	I	L	W	M	L	D	R	L
A/muscovy-duck/Vietnam/HN4713/2018	H5N6	2.3.4.4h	97	M	S	L	L	T	E	V	E	T	P	T	R	N	G	W	E	C	R	C	S	D	S	S	D	P	L	V	V	A	A	S	I	I	G	I	L	H	L	I	L	W	M	L	D	R	L
A/muscovy-duck/Vietnam/HN4714/2018	H5N6	2.3.4.4h	97	M	S	L	L	T	E	V	E	T	P	T	R	N	G	W	E	C	R	C	S	D	S	S	D	P	L	V	V	A	A	S	I	I	G	I	L	H	L	I	L	W	M	L	D	R	L
A/muscovy-duck/Vietnam/HN4715/2018	H5N6	2.3.4.4h	97	M	S	L	L	T	E	V	E	T	P	T	R	N	G	W	E	C	R	C	S	D	S	S	D	P	L	V	V	A	A	S	I	I	G	I	L	H	L	I	L	W	M	L	D	R	L
A/muscovy-duck/Vietnam/HN4716/2018	H5N6	2.3.4.4h	97	M	S	L	L	T	E	V	E	T	P	T	R	N	G	W	E	C	R	C	S	D	S	S	D	P	L	V	V	A	A	S	I	I	G	I	L	H	L	I	L	W	M	L	D	R	L
A/muscovy-duck/Vietnam/HN4718/2018	H5N6	2.3.4.4h	97	M	S	L	L	T	E	V	E	T	P	T	R	N	G	W	E	C	R	C	S	D	S	S	D	P	L	V	V	A	A	S	I	I	G	I	L	H	L	I	L	W	M	L	D	R	L
A/muscovy-duck/Vietnam/HN4719/2018	H5N6	2.3.4.4h	97	M	S	L	L	T	E	V	E	T	P	T	R	N	G	W	E	C	R	C	S	D	S	S	D	P	L	V	V	A	A	S	I	I	G	I	L	H	L	I	L	W	M	L	D	R	L
A/muscovy-duck/Vietnam/HN4720/2018	H5N6	2.3.4.4h	97	M	S	L	L	T	E	V	E	T	P	T	R	N	G	W	E	C	R	C	S	D	S	S	D	P	L	V	V	A	A	S	I	I	G	I	L	H	L	I	L	W	M	L	D	R	L
A/duck/Vietnam/HN4721/2018	H5N6	2.3.4.4h	97	M	S	L	L	T	E	V	E	T	P	T	R	N	G	W	E	C	R	C	S	D	S	S	D	P	L	V	V	A	A	S	I	I	G	I	L	H	L	I	L	W	M	L	D	R	L
A/muscovy-duck/Vietnam/HN4856/2018	H5N6	2.3.4.4h	97	M	S	L	L	T	E	V	E	T	P	T	R	N	G	W	E	C	R	C	S	D	S	S	D	P	L	V	V	A	A	S	I	I	G	I	L	H	L	I	L	W	I	L	D	R	L
A/muscovy-duck/Vietnam/HN4857/2018	H5N6	2.3.4.4h	97	M	S	L	L	T	E	V	E	T	P	T	R	N	G	W	E	C	R	C	S	D	S	S	D	P	L	V	V	A	A	S	I	I	G	I	L	H	L	I	L	W	I	L	D	R	L
A/muscovy-duck/Vietnam/HN4858/2018	H5N6	2.3.4.4h	97	M	S	L	L	T	E	V	E	T	P	T	R	N	G	W	E	C	R	C	S	D	S	S	D	P	L	V	V	A	A	S	I	I	G	I	L	H	L	I	L	W	I	L	D	R	L
A/muscovy-duck/Vietnam/HN5046/2018	H5N6	2.3.4.4h	97	M	S	L	L	T	E	V	E	T	P	T	R	N	G	W	E	C	R	C	S	D	S	S	D	P	L	V	V	A	A	S	I	I	G	I	L	H	L	T	L	W	I	L	D	R	L
A/muscovy-duck/Vietnam/HN5047/2018	H5N6	2.3.4.4h	97	M	S	L	L	T	E	V	E	T	P	T	R	N	G	W	E	C	R	C	S	D	S	S	D	P	L	V	V	A	A	S	I	I	G	I	L	H	L	T	L	W	I	L	D	R	L
A/muscovy-duck/Vietnam/HN5048/2018	H5N6	2.3.4.4h	97	M	S	L	L	T	E	V	E	T	P	T	R	N	G	W	E	C	R	C	S	D	S	S	D	P	L	V	V	A	A	S	I	I	G	I	L	H	L	T	L	W	I	L	D	R	L
A/duck/Vietnam/HN5080/2018	H5N6	2.3.4.4h	97	M	S	L	L	T	E	V	E	T	P	T	R	N	G	W	E	C	R	C	S	D	S	S	D	P	L	V	V	A	A	S	I	I	G	I	L	H	L	I	L	W	I	L	D	R	L
A/muscovy-duck/Vietnam/HN5132/2018	H5N6	2.3.4.4h	97	M	S	L	L	T	E	V	E	T	P	T	R	N	G	W	E	C	R	C	S	D	S	S	D	P	L	V	V	A	A	S	I	I	G	I	L	H	L	I	L	W	I	L	D	R	L
A/muscovy-duck/Vietnam/HN5135/2018	H5N6	2.3.4.4h	97	M	S	L	L	T	E	V	E	T	P	T	R	N	G	W	E	C	R	C	S	D	S	S	D	P	L	V	V	A	A	S	I	I	G	I	L	H	L	I	L	W	I	L	D	R	L
A/muscovy-duck/Vietnam/HN5137/2018	H5N6	2.3.4.4h	97	M	S	L	L	T	E	V	E	T	P	T	R	N	G	W	E	C	R	C	S	D	S	S	D	P	L	V	V	A	A	S	I	I	G	I	L	H	L	I	L	W	I	L	D	R	L
A/muscovy-duck/Vietnam/HN5138/2018	H5N6	2.3.4.4h	97	M	S	L	L	T	E	V	E	T	P	T	R	N	G	W	E	C	R	C	S	D	S	S	D	P	L	V	V	A	A	S	I	I	G	I	L	H	L	I	L	W	I	L	D	R	L
A/muscovy-duck/Vietnam/HN5139/2018	H5N6	2.3.4.4h	97	M	S	L	L	T	E	V	E	T	P	T	R	N	G	W	E	C	R	C	S	D	S	S	D	P	L	V	V	A	A	S	I	I	G	I	L	H	L	I	L	W	I	L	D	R	L
A/muscovy-duck/Vietnam/HN5140/2018	H5H9N2N6	2.3.4.4h	97	M	S	L	L	T	E	V	E	T	L	T	K	T	G	W	E	C	N	C	S	G	S	S	D	P	L	V	V	A	A	N	I	I	G	I	L	H	L	I	L	W	I	L	D	R	L
A/muscovy-duck/Vietnam/HN5049/2018	H5N6	2.3.4.4h	97	M	S	L	L	T	E	V	E	T	P	T	R	N	G	W	E	C	R	C	S	D	S	S	D	P	L	V	V	A	A	S	I	I	G	I	L	H	L	T	L	W	I	L	D	R	L
A/duck/Vietnam/HN5150/2018	H5H6N6	2.3.4.4h	97	M	S	L	L	T	E	V	E	T	P	T	R	N	G	W	E	C	K	C	S	D	S	S	D	P	L	I	I	A	A	S	I	I	G	I	L	H	L	I	L	W	I	L	D	R	L
A/muscovy-duck/Vietnam/HN6029/2019	H5H6N6N8	2.3.4.4h	97	M	S	L	L	T	E	V	E	T	P	T	R	N	G	W	E	C	R	C	S	D	S	S	D	P	L	V	I	A	A	S	I	I	G	I	L	H	L	I	L	W	I	L	D	R	L
A/muscovy-duck/Vietnam/HN6111/2020	H5N6	2.3.4.4h	97	M	S	L	L	T	E	V	E	T	P	T	R	N	G	W	E	C	R	C	S	D	S	S	D	P	L	V	V	A	A	S	I	I	G	I	L	H	L	I	L	W	I	L	D	R	L
A/muscovy-duck/Vietnam/HN6113/2020	H5N6	2.3.4.4h	97	M	S	L	L	T	E	V	E	T	P	T	R	N	G	W	E	C	R	C	S	D	S	S	D	P	L	V	V	A	A	S	I	I	G	I	L	H	L	I	L	W	I	L	D	R	L
A/muscovy-duck/Vietnam/HN6114/2020	H5N6	2.3.4.4h	97	M	S	L	L	T	E	V	E	T	P	T	R	N	G	W	E	C	R	C	S	D	S	S	D	P	L	V	V	A	A	S	I	I	G	I	L	H	L	I	L	W	I	L	D	R	L
A/muscovy-duck/Vietnam/HN6115/2020	H5N6	2.3.4.4h	97	M	S	L	L	T	E	V	E	T	P	T	R	N	G	W	E	C	R	C	S	D	S	S	D	P	L	V	V	A	A	S	I	I	G	I	L	H	L	I	L	W	I	L	D	R	L
A/muscovy-duck/Vietnam/HN6119/2020	H5N6	2.3.4.4h	97	M	S	L	L	T	E	V	E	T	P	T	R	N	G	W	E	C	R	C	S	D	S	S	D	P	L	V	V	A	A	S	I	I	G	I	L	H	L	I	L	W	I	L	D	R	L
A/muscovy-duck/Vietnam/HN6120/2020	H5N6	2.3.4.4h	97	M	S	L	L	T	E	V	E	T	P	T	R	N	G	W	E	C	R	C	S	D	S	S	D	P	L	V	V	A	A	S	I	I	G	I	L	H	L	I	L	W	I	L	D	R	L
A/muscovy-duck/Vietnam/HN6606/2020	H5N6	2.3.4.4h	97	M	S	L	L	T	E	V	E	T	P	T	R	N	G	W	E	C	R	C	S	D	S	S	D	P	L	I	V	A	A	S	I	I	G	I	L	H	L	I	L	W	I	L	D	R	L
A/muscovy-duck/Vietnam/HN6607/2020	H5N6	2.3.4.4h	97	M	S	L	L	T	E	V	E	T	P	T	R	N	G	W	E	C	R	C	S	D	S	S	D	P	L	I	V	A	A	S	I	I	G	I	L	H	L	I	L	W	I	L	D	R	L
A/muscovy-duck/Vietnam/HN6608/2020	H5N6	2.3.4.4h	97	M	S	L	L	T	E	V	E	T	P	T	R	N	G	W	E	C	R	C	S	D	S	S	D	P	L	I	V	A	A	S	I	I	G	I	L	H	L	I	L	W	I	L	D	R	L
A/muscovy-duck/Vietnam/HN6609/2020	H5N6	2.3.4.4h	97	M	S	L	L	T	E	V	E	T	P	T	R	N	G	W	E	C	R	C	S	D	S	S	D	P	L	I	V	A	A	S	I	I	G	I	L	H	L	I	L	W	I	L	D	R	L
A/muscovy-duck/Vietnam/HN6610/2020	H5N6	2.3.4.4h	97	M	S	L	L	T	E	V	E	T	P	T	R	N	G	W	E	C	R	C	S	D	S	S	D	P	L	I	V	A	A	S	I	I	G	I	L	H	L	I	L	W	I	L	D	R	L
A/duck/Vietnam/HN6611/2020	H5N6	2.3.4.4h	97	M	S	L	L	T	E	V	E	T	P	T	R	N	G	W	E	C	R	C	S	D	S	S	D	P	L	I	V	A	A	S	I	I	G	I	L	H	L	I	L	W	I	L	D	R	L
A/muscovy-duck/Vietnam/HN6692/2020	H5N6	2.3.4.4h	97	M	S	L	L	T	E	V	E	T	P	T	R	N	G	W	E	C	R	C	S	D	S	S	D	P	L	V	V	A	A	S	I	I	G	I	L	H	L	I	L	W	I	L	D	R	L
A/muscovy-duck/Vietnam/HN6698/2020	H4H5N6	2.3.4.4h	97	M	S	L	L	T	E	V	E	T	P	T	R	N	G	W	E	C	K	C	S	D	S	S	D	P	L	V	I	A	A	S	I	I	G	I	L	H	L	I	L	W	I	L	D	R	L
A/muscovy-duck/Vietnam/HN6699/2020	H4H5N6	2.3.4.4h	97	M	S	L	L	T	E	V	E	T	P	T	R	N	G	W	E	C	R	C	S	D	S	S	D	P	L	V	V	A	A	S	I	I	G	I	L	H	L	I	L	W	I	L	D	R	L
A/muscovy-duck/Vietnam/HN6811/2020	H5H6N6	2.3.4.4h	97	M	S	L	L	T	E	V	E	T	P	T	R	N	G	W	E	C	K	C	S	D	S	S	D	P	L	I	I	A	A	S	I	I	G	I	L	H	L	I	L	W	I	L	D	R	L
A/muscovy-duck/Vietnam/HN6881/2021	H5N6	2.3.4.4h	97	M	S	L	L	T	E	V	E	T	P	T	R	N	G	W	G	C	R	C	S	D	S	S	D	P	L	I	V	A	A	S	I	I	G	I	L	H	L	I	L	W	I	L	D	R	L
A/muscovy-duck/Vietnam/HN6884/2021	H5N6	2.3.4.4h	97	M	S	L	L	T	E	V	E	T	P	T	R	N	G	W	G	C	R	C	S	D	S	S	D	P	L	I	V	A	A	S	I	I	G	I	L	H	L	I	L	W	I	L	D	R	L
A/muscovy-duck/Vietnam/HN6890/2021	H5N6	2.3.4.4h	97	M	S	L	L	T	E	V	E	T	P	T	R	N	G	W	G	C	R	C	S	D	S	S	D	P	L	I	V	A	A	S	I	I	G	I	L	H	L	I	L	W	I	L	D	R	L
A/duck/Vietnam/HN6893/2021	H5N6	2.3.4.4h	97	M	S	L	L	T	E	V	E	T	P	T	R	N	G	W	G	C	R	C	S	D	S	S	D	P	L	I	V	A	A	S	I	I	G	I	L	H	L	I	L	W	I	L	D	R	L
A/duck/Vietnam/HN6894/2021	H5N6	2.3.4.4h	97	M	S	L	L	T	E	V	E	T	P	T	R	N	G	W	G	C	R	C	S	D	S	S	D	P	L	I	V	A	A	S	I	I	G	I	L	H	L	I	L	W	I	L	D	R	L
A/duck/Vietnam/HN6896/2021	H5N6	2.3.4.4h	97	M	S	L	L	T	E	V	E	T	P	T	R	N	G	W	G	C	R	C	S	D	S	S	D	P	L	I	V	A	A	S	I	I	G	I	L	H	L	I	L	W	I	L	D	R	L
A/duck/Vietnam/HN6897/2021	H5N6	2.3.4.4h	97	M	S	L	L	T	E	V	E	T	P	T	R	N	G	W	G	C	R	C	S	D	S	S	D	P	L	I	V	A	A	S	I	I	G	I	L	H	L	I	L	W	I	L	D	R	L
A/duck/Vietnam/HN6898/2021	H5N6	2.3.4.4h	97	M	S	L	L	T	E	V	E	T	P	T	R	N	G	W	G	C	R	C	S	D	S	S	D	P	L	I	V	A	A	S	I	I	G	I	L	H	L	I	L	W	I	L	D	R	L
A/duck/Vietnam/QN6519/2020	H5N6	2.3.4.4h	97	M	S	L	L	T	E	V	E	T	H	T	R	N	G	W	E	C	R	C	S	D	S	S	D	P	L	V	V	A	A	S	I	I	G	I	L	H	L	I	L	W	I	L	D	R	L
A/duck/Vietnam/QN6658/2020	H5N6	2.3.4.4h	97	M	S	L	L	T	E	V	E	T	P	T	R	N	G	W	E	C	R	C	S	D	S	S	D	P	L	V	V	A	A	S	I	I	G	I	L	H	L	I	L	W	I	L	D	R	L
A/duck/Vietnam/QN6659/2020	H5N6	2.3.4.4h	97	M	S	L	L	T	E	V	E	T	H	T	R	N	G	W	E	C	R	C	S	D	S	S	D	P	L	V	V	A	A	S	I	I	G	I	L	H	L	I	L	W	I	L	D	R	L
A/duck/Vietnam/QN6660/2020	H5N6	2.3.4.4h	97	M	S	L	L	T	E	V	E	T	P	T	R	N	G	W	E	C	R	C	S	D	S	S	D	P	L	V	V	A	A	S	I	I	G	I	L	H	L	I	L	W	I	L	D	R	L
A/duck/Vietnam/QN6661/2020	H5N6	2.3.4.4h	97	M	S	L	L	T	E	V	E	T	P	T	R	N	G	W	E	C	R	C	S	D	S	S	D	P	L	V	V	A	A	S	I	I	G	I	L	H	L	I	L	W	I	L	D	R	L
A/duck/Vietnam/QN6730/2020	H5N6	2.3.4.4h	97	M	S	L	L	T	E	V	E	T	P	T	R	N	G	W	E	C	R	C	S	D	S	S	D	P	L	V	V	A	A	S	I	I	G	I	L	H	L	I	L	W	I	L	D	R	L
A/duck/Vietnam/QN6736/2020	H4H5N2N6	2.3.4.4h	97	M	S	L	L	T	E	V	E	T	P	T	R	N	G	W	E	C	R	C	S	D	S	S	D	P	L	V	V	A	A	S	I	I	G	I	L	H	L	I	L	W	I	L	D	R	L
A/duck/Vietnam/QN6739/2020	H5N6	2.3.4.4h	97	M	S	L	L	T	E	V	E	T	P	T	R	N	G	W	E	C	R	C	S	D	S	S	D	P	L	V	V	A	A	S	I	I	G	I	L	H	L	I	L	W	I	L	D	R	L
A/duck/Vietnam/QN6796/2020	H5N6	2.3.4.4h	97	M	S	L	L	T	E	V	E	T	P	T	R	N	G	W	E	C	R	C	S	D	S	S	D	P	L	V	V	A	A	S	I	I	G	I	L	H	L	I	L	W	I	L	D	R	L
A/duck/Vietnam/QN6798/2020	H5N6	2.3.4.4h	97	M	S	L	L	T	E	V	E	T	P	T	R	N	G	W	E	C	R	C	S	D	S	S	D	P	L	V	V	A	A	S	I	I	G	I	L	H	L	I	L	W	I	L	D	R	L
A/duck/Vietnam/QN6799/2020	H5N6	2.3.4.4h	97	M	S	L	L	T	E	V	E	T	P	T	R	N	G	W	E	C	R	C	S	D	S	S	D	P	L	V	V	A	A	S	I	I	G	I	L	H	L	I	L	W	I	L	D	R	L
A/duck/Vietnam/QN6800/2020	H5N6	2.3.4.4h	97	M	S	L	L	T	E	V	E	T	P	T	R	N	G	W	E	C	R	C	S	D	S	S	D	P	L	V	V	A	A	S	I	I	G	I	L	H	L	I	L	W	I	L	D	R	L
A/duck/Vietnam/QN6801/2020	H5N6	2.3.4.4h	97	M	S	L	L	T	E	V	E	T	P	T	R	N	G	W	E	C	R	C	S	D	S	S	D	P	L	V	V	A	A	S	I	I	G	I	L	H	L	I	L	W	I	L	D	R	L
A/duck/Vietnam/QN6803/2020	H3H5N2N6	2.3.4.4h	97	M	S	L	L	T	E	V	E	T	P	T	R	N	G	W	E	C	K	C	N	D	S	S	D	P	L	V	I	A	A	S	I	I	G	I	L	H	L	I	L	W	I	L	D	R	L
A/duck/Vietnam/QN6804/2020	H5N6	2.3.4.4h	97	M	S	L	L	T	E	V	E	T	P	T	R	N	G	W	E	C	R	C	S	D	S	S	D	P	L	V	V	A	A	S	I	I	G	I	L	H	L	I	L	W	I	L	D	R	L
A/duck/Vietnam/QN6805/2020	H5N6	2.3.4.4h	97	M	S	L	L	T	E	V	E	T	P	T	R	N	G	W	E	C	R	C	S	D	S	S	D	P	L	V	V	A	A	S	I	I	G	I	L	H	L	I	L	W	I	L	D	R	L
A/duck/Vietnam/QN6806/2020	H5N6	2.3.4.4h	97	M	S	L	L	T	E	V	E	T	P	T	R	N	G	W	E	C	R	C	S	D	S	S	D	P	L	V	V	A	A	S	I	I	G	I	L	H	L	I	L	W	I	L	D	R	L
A/duck/Vietnam/QN6807/2020	H3H5N2N6N8	2.3.4.4h	97	M	S	L	L	T	E	V	E	T	P	T	R	N	G	W	E	C	K	C	N	D	S	S	D	P	L	V	I	A	A	S	I	I	G	I	L	H	L	I	L	W	I	L	D	R	L
A/duck/Vietnam/QN6808/2020	H5N6	2.3.4.4h	97	M	S	L	L	T	E	V	E	T	P	T	R	N	G	W	E	C	R	C	S	D	S	S	D	P	L	V	V	A	A	S	I	I	G	I	L	H	L	I	L	W	I	L	D	R	L
A/duck/Vietnam/QN6809/2020	H3H5N6	2.3.4.4h	97	M	S	L	L	T	E	V	E	T	P	T	R	N	G	W	E	C	R	C	S	D	S	S	D	P	L	V	V	A	A	S	I	I	G	I	L	H	L	I	L	W	I	L	D	R	L
A/duck/Vietnam/HN5141/2018	H5N6	2.3.4.4g	97	M	S	L	L	T	E	V	E	T	P	T	R	N	E	W	E	C	R	C	S	D	S	S	D	P	L	V	V	A	A	S	I	I	G	I	L	H	L	I	L	W	I	L	D	R	L
A/duck/Vietnam/HN5142/2018	H5N6	2.3.4.4g	97	M	S	L	L	T	E	V	E	T	P	T	R	N	E	W	E	C	R	C	S	D	S	S	D	P	L	V	V	A	A	S	I	I	G	I	L	H	L	I	L	W	I	L	D	R	L
A/duck/Vietnam/HN5143/2018	H5N6	2.3.4.4g	97	M	S	L	L	T	E	V	E	T	P	T	R	N	E	W	E	C	R	C	S	D	S	S	D	P	L	V	V	A	A	S	I	I	G	I	L	H	L	I	L	W	I	L	D	R	L
A/duck/Vietnam/HN5144/2018	H5N6*	2.3.4.4g	97	M	S	L	L	T	E	V	E	T	P	T	R	N	E	W	E	C	R	C	S	D	S	S	D	P	L	V	V	A	A	S	I	I	G	I	L	H	L	I	L	W	I	L	D	R	L
A/duck/Vietnam/HN5145/2018	H5N6	2.3.4.4g	97	M	S	L	L	T	E	V	E	T	P	T	R	N	E	W	E	C	R	C	S	D	S	S	D	P	L	V	V	A	A	S	I	I	G	I	L	H	L	I	L	W	I	L	D	R	L
A/duck/Vietnam/HN5147/2018	H5N6	2.3.4.4g	97	M	S	L	L	T	E	V	E	T	P	T	R	N	E	W	E	C	R	C	S	D	S	S	D	P	L	V	V	A	A	S	I	I	G	I	L	H	L	I	L	W	I	L	D	R	L
A/duck/Vietnam/HN5148/2018	H5N6*	2.3.4.4g	97	M	S	L	L	T	E	V	E	T	P	T	R	N	E	W	E	C	R	C	S	D	S	S	D	P	L	V	V	A	A	S	I	I	G	I	L	H	L	I	L	W	I	L	D	R	L
A/duck/Vietnam/HN5149/2018	H5N6	2.3.4.4g	97	M	S	L	L	T	E	V	E	T	P	T	R	N	E	W	E	C	R	C	S	D	S	S	D	P	L	V	V	A	A	S	I	I	G	I	L	H	L	I	L	W	I	L	D	R	L
*Samples did not show 'mixed' HA sequences, but they did show 'mixed' N6 NA and mixed PB2, PB1, PA, and NS1 sequences.
[truncated: 51 more columns]

[truncated: 2 more sheets: A_NS1, A_NS2]
