# Supplementary material for: Continued Circulation of Highly Pathogenic H5 Influenza Viruses in Vietnamese Live Bird Markets in 2018–2021
Source: Viruses. 2023 Jul 21;15(7):1596. doi: 10.3390/v15071596 (PMC10384249; doi:10.3390/v15071596)
Supplement: Supplementary file 1 [file viruses-15-01596-s001.zip › Guan - Supplemental Table 3_071823.xlsx]

## Sheet: PB2_SNPs
Supplemental Table 3: Polymorphisms in the proteins of H5N6 influenza viruses isolated in Vietnam from 2018 to 2021.
Virus	Subtype	Clade	cDNA_position	AA_position*	Consensus_AA*	Minority_AA*	Consensus_NT*	Minority_NT*	Codon	Consensus_Frequency	Minority_Frequency
A/duck/Vietnam/QN6659/2020	H5N6	2.3.4.4h	241	81	T	A	A	G	Aca/Gca	0.89	0.109
A/muscovy-duck/Vietnam/HN5139/2018	H5N6	2.3.4.4h	245	82	T	N	C	A	aCt/aAt	0.687	0.313
A/duck/Vietnam/HN6898/2021	H5N6	2.3.4.4h	316	106	T	A	A	G	Aca/Gca	0.891	0.109
A/duck/Vietnam/QN6798/2020	H5N6	2.3.4.4h	317	106	I	T	T	C	aTa/aCa	0.931	0.069
A/duck/Vietnam/QN6799/2020	H5N6	2.3.4.4h	317	106	I	T	T	C	aTa/aCa	0.556	0.444
A/duck/Vietnam/QN6806/2020	H5N6	2.3.4.4h	326	109	V	A	T	C	gTc/gCc	0.955	0.045
A/duck/Vietnam/QN6661/2020	H5N6	2.3.4.4h	334	112	P	S	C	T	Cca/Tca	0.523	0.476
A/duck/Vietnam/HN6898/2021	H5N6	2.3.4.4h	362	121	K	R	A	G	aAg/aGg	0.893	0.107
A/duck/Vietnam/HN6893/2021	H5N6	2.3.4.4h	457	153	D	N	G	A	Gat/Aat	0.965	0.034
A/duck/Vietnam/QN6661/2020	H5N6	2.3.4.4h	457	153	D	N	G	A	Gat/Aat	0.542	0.458
A/duck/Vietnam/QN6805/2020	H5N6	2.3.4.4h	464	155	S	N	G	A	aGt/aAt	0.808	0.192
A/muscovy-duck/Vietnam/HN6607/2020	H5N6	2.3.4.4h	673	225	S	G	A	G	Agc/Ggc	0.938	0.062
A/muscovy-duck/Vietnam/HN4714/2018	H5N6	2.3.4.4h	757	253	D	N	G	A	Gat/Aat	0.947	0.053
A/muscovy-duck/Vietnam/HN4720/2018	H5N6	2.3.4.4h	757	253	D	N	G	A	Gat/Aat	0.955	0.045
A/muscovy-duck/Vietnam/HN5048/2018	H5N6	2.3.4.4h	874	292	V	I	G	A	Gta/Ata	0.619	0.379
A/muscovy-duck/Vietnam/HN5049/2018	H5N6	2.3.4.4h	874	292	V	I	G	A	Gta/Ata	0.815	0.181
A/duck/Vietnam/QN6798/2020	H5N6	2.3.4.4h	912	304	E	D	A	T	gaA/gaT	0.934	0.065
A/duck/Vietnam/QN6805/2020	H5N6	2.3.4.4h	912	304	E	D	A	T	gaA/gaT	0.874	0.125
A/duck/Vietnam/QN6808/2020	H5N6	2.3.4.4h	912	304	E	D	A	T	gaA/gaT	0.799	0.198
A/muscovy-duck/Vietnam/HN4711/2018	H5N6	2.3.4.4h	1028	343	E	G	A	G	gAa/gGa	0.974	0.026
A/duck/Vietnam/QN6805/2020	H5N6	2.3.4.4h	1064	355	K	R	A	G	aAa/aGa	0.783	0.217
A/duck/Vietnam/QN6739/2020	H5N6	2.3.4.4h	1079	360	Y	C	A	G	tAt/tGt	0.961	0.039
A/muscovy-duck/Vietnam/HN5048/2018	H5N6	2.3.4.4h	1367	456	N	S	A	G	aAt/aGt	0.971	0.027
A/muscovy-duck/Vietnam/HN5049/2018	H5N6	2.3.4.4h	1367	456	N	S	A	G	aAt/aGt	0.816	0.184
A/muscovy-duck/Vietnam/HN5046/2018	H5N6	2.3.4.4h	1417	473	M	V	A	G	Atg/Gtg	0.972	0.028
A/duck/Vietnam/QN6805/2020	H5N6	2.3.4.4h	1480, 1482	494	V	I	GtG	AtT	GtG/AtT	91%,91%	9%,9%
A/muscovy-duck/Vietnam/HN6609/2020	H5N6	2.3.4.4h	1558	520	E	*	G	T	Gaa/Taa	0.955	0.043
A/muscovy-duck/Vietnam/HN6606/2020	H5N6	2.3.4.4h	1969	657	N	H	A	C	Aac/Cac	0.971	0.026
A/muscovy-duck/Vietnam/HN6607/2020	H5N6	2.3.4.4h	1969	657	N	H	A	C	Aac/Cac	0.96	0.038
A/muscovy-duck/Vietnam/HN6608/2020	H5N6	2.3.4.4h	1969	657	N	H	A	C	Aac/Cac	0.94	0.06
A/muscovy-duck/Vietnam/HN6609/2020	H5N6	2.3.4.4h	1969	657	N	H	A	C	Aac/Cac	0.973	0.027
A/muscovy-duck/Vietnam/HN4715/2018	H5N6	2.3.4.4h	2023	675	L	M	C	A	Ctg/Atg	0.958	0.038
A/muscovy-duck/Vietnam/HN4715/2018	H5N6	2.3.4.4h	2054	685	G	E	G	A	gGa/gAa	0.949	0.051
A/duck/Vietnam/QN6805/2020	H5N6	2.3.4.4h	2096	699	R	K	G	A	aGa/aAa	0.788	0.205
A/duck/Vietnam/QN6661/2020	H5N6	2.3.4.4h	2174	725	L	P	T	C	cTg/cCg	0.945	0.05
A/duck/Vietnam/HN5148/2018	H5N6	2.3.4.4g	2192	731	V	A	T	C	gTg/gCg	0.81	0.19
A/duck/Vietnam/HN5149/2018	H5N6	2.3.4.4g	2192	731	V	A	T	C	gTg/gCg	0.972	0.027
*AA, amino acid; NT, nucleotide

## Sheet: PB1_SNPs
Supplemental Table 3: Polymorphisms in the proteins of H5N6 influenza viruses isolated in Vietnam from 2018 to 2021.
Virus	Subtype	Clade	cDNA_position	AA_position*	Consensus_AA*	Minority_AA*	Consensus_NT*	Minority_NT*	Codon	Consensus_Frequency	Minority_Frequency
A/duck/Vietnam/QN6805/2020	H5N6	2.3.4.4h	131	44	N	S	A	G	aAc/aGc	0.925	0.073
A/duck/Vietnam/HN5149/2018	H5N6	2.3.4.4g	161	54	G	E	G	A	gGa/gAa	0.909	0.09
A/muscovy-duck/Vietnam/HN5048/2018	H5N6	2.3.4.4h	214	72	P	S	C	T	Cca/Tca	0.71	0.29
A/duck/Vietnam/HN6893/2021	H5N6	2.3.4.4h	238	80	S	C	A	T	Agt/Tgt	0.89	0.109
A/muscovy-duck/Vietnam/HN6692/2020	H5N6	2.3.4.4h	240	80	S	R	T	G	agT/agG	0.971	0.025
A/duck/Vietnam/QN6808/2020	H5N6	2.3.4.4h	287	96	E	G	A	G	gAa/gGa	0.83	0.17
A/duck/Vietnam/QN6730/2020	H5N6	2.3.4.4h	313	105	N	D	A	G	Aac/Gac	0.549	0.451
A/muscovy-duck/Vietnam/HN6606/2020	H5N6	2.3.4.4h	337	113	V	I	G	A	Gtt/Att	0.577	0.423
A/muscovy-duck/Vietnam/HN6610/2020	H5N6	2.3.4.4h	337	113	I	V	A	G	Att/Gtt	0.774	0.226
A/duck/Vietnam/QN6798/2020	H5N6	2.3.4.4h	397	133	L	M	C	A	Ctg/Atg	0.969	0.031
A/duck/Vietnam/QN6805/2020	H5N6	2.3.4.4h	437	146	T	S	C	G	aCt/aGt	0.907	0.093
A/duck/Vietnam/QN6730/2020	H5N6	2.3.4.4h	448	150	F	L	T	C	Ttc/Ctc	0.956	0.044
A/muscovy-duck/Vietnam/HN6606/2020	H5N6	2.3.4.4h	523	175	N	D	A	G	Aat/Gat	0.546	0.454
A/muscovy-duck/Vietnam/HN6610/2020	H5N6	2.3.4.4h	523	175	D	N	G	A	Gat/Aat	0.769	0.229
A/duck/Vietnam/QN6659/2020	H5N6	2.3.4.4h	541	181	I	V	A	G	Ata/Gta	0.958	0.041
A/duck/Vietnam/HN6898/2021	H5N6	2.3.4.4h	1114	372	M	V	A	G	Atg/Gtg	0.907	0.093
A/muscovy-duck/Vietnam/HN5048/2018	H5N6	2.3.4.4h	1126	376	V	I	G	A	Gtt/Att	0.626	0.374
A/muscovy-duck/Vietnam/HN5049/2018	H5N6	2.3.4.4h	1126	376	V	I	G	A	Gtt/Att	0.781	0.219
A/duck/Vietnam/QN6805/2020	H5N6	2.3.4.4h	1136	379	K	R	A	G	aAg/aGg	0.882	0.117
A/duck/Vietnam/HN6611/2020	H5N6	2.3.4.4h	1358	453	A	V	C	T	gCc/gTc	0.97	0.03
A/duck/Vietnam/QN6519/2020	H5N6	2.3.4.4h	1358	453	A	V	C	T	gCc/gTc	0.942	0.058
A/muscovy-duck/Vietnam/HN4716/2018	H5N6	2.3.4.4h	1358	453	A	V	C	T	gCc/gTc	0.91	0.09
A/muscovy-duck/Vietnam/HN4858/2018	H5N6	2.3.4.4h	1358	453	A	V	C	T	gCc/gTc	0.963	0.037
A/muscovy-duck/Vietnam/HN5046/2018	H5N6	2.3.4.4h	1358	453	A	V	C	T	gCc/gTc	0.947	0.05
A/muscovy-duck/Vietnam/HN5048/2018	H5N6	2.3.4.4h	1358	453	A	V	C	T	gCc/gTc	0.958	0.042
A/muscovy-duck/Vietnam/HN6114/2020	H5N6	2.3.4.4h	1358	453	A	V	C	T	gCc/gTc	0.969	0.031
A/muscovy-duck/Vietnam/HN6115/2020	H5N6	2.3.4.4h	1358	453	A	V	C	T	gCc/gTc	0.922	0.078
A/muscovy-duck/Vietnam/HN6120/2020	H5N6	2.3.4.4h	1358	453	A	V	C	T	gCc/gTc	0.962	0.036
A/muscovy-duck/Vietnam/HN6606/2020	H5N6	2.3.4.4h	1358	453	A	V	C	T	gCc/gTc	0.933	0.067
A/muscovy-duck/Vietnam/HN6607/2020	H5N6	2.3.4.4h	1358	453	A	V	C	T	gCc/gTc	0.925	0.065
A/muscovy-duck/Vietnam/HN6608/2020	H5N6	2.3.4.4h	1358	453	A	V	C	T	gCc/gTc	0.948	0.048
A/muscovy-duck/Vietnam/HN6609/2020	H5N6	2.3.4.4h	1358	453	A	V	C	T	gCc/gTc	0.904	0.096
A/duck/Vietnam/QN6804/2020	H5N6	2.3.4.4h	1363	455	D	N	G	A	Gat/Aat	0.863	0.137
A/duck/Vietnam/QN6806/2020	H5N6	2.3.4.4h	1363	455	N	D	A	G	Aat/Gat	0.626	0.374
A/duck/Vietnam/QN6519/2020	H5N6	2.3.4.4h	1465	489	T	A	A	G	Aca/Gca	0.91	0.09
A/muscovy-duck/Vietnam/HN4716/2018	H5N6	2.3.4.4h	1512	504	N	K	T	A	aaT/aaA	0.95	0.046
A/muscovy-duck/Vietnam/HN4716/2018	H5N6	2.3.4.4h	1517	506	S	T	G	C	aGt/aCt	0.953	0.047
A/muscovy-duck/Vietnam/HN4857/2018	H5N6	2.3.4.4h	1534	512	L	F	C	T	Ctt/Ttt	0.817	0.182
A/muscovy-duck/Vietnam/HN4858/2018	H5N6	2.3.4.4h	1534	512	L	F	C	T	Ctt/Ttt	0.897	0.103
A/duck/Vietnam/HN6893/2021	H5N6	2.3.4.4h	1569	523	M	I	G	A	atG/atA	0.963	0.037
A/duck/Vietnam/QN6806/2020	H5N6	2.3.4.4h	1699	567	Q	K	C	A	Caa/Aaa	0.86	0.135
A/muscovy-duck/Vietnam/HN6610/2020	H5N6	2.3.4.4h	1720	574	F	L	T	C	Ttc/Ctc	0.967	0.033
A/duck/Vietnam/HN5080/2018	H5N6	2.3.4.4h	1772	591	V	D	T	A	gTt/gAt	0.956	0.044
A/duck/Vietnam/QN6519/2020	H5N6	2.3.4.4h	1772	591	V	D	T	A	gTt/gAt	0.886	0.114
A/muscovy-duck/Vietnam/HN4714/2018	H5N6	2.3.4.4h	1772	591	V	D	T	A	gTt/gAt	0.909	0.086
A/muscovy-duck/Vietnam/HN4715/2018	H5N6	2.3.4.4h	1772	591	V	D	T	A	gTt/gAt	0.676	0.318
A/muscovy-duck/Vietnam/HN4716/2018	H5N6	2.3.4.4h	1772	591	V	D	T	A	gTt/gAt	0.619	0.381
A/muscovy-duck/Vietnam/HN4719/2018	H5N6	2.3.4.4h	1772	591	V	D	T	A	gTt/gAt	0.88	0.115
A/muscovy-duck/Vietnam/HN4720/2018	H5N6	2.3.4.4h	1772	591	V	D	T	A	gTt/gAt	0.962	0.035
A/muscovy-duck/Vietnam/HN5048/2018	H5N6	2.3.4.4h	1772	591	V	D	T	A	gTt/gAt	0.97	0.025
A/muscovy-duck/Vietnam/HN6114/2020	H5N6	2.3.4.4h	1772	591	V	D	T	A	gTt/gAt	0.971	0.029
A/muscovy-duck/Vietnam/HN6115/2020	H5N6	2.3.4.4h	1772	591	V	D	T	A	gTt/gAt	0.965	0.032
A/muscovy-duck/Vietnam/HN6608/2020	H5N6	2.3.4.4h	1772	591	V	D	T	A	gTt/gAt	0.968	0.029
A/muscovy-duck/Vietnam/HN6609/2020	H5N6	2.3.4.4h	1772	591	V	D	T	A	gTt/gAt	0.929	0.071
A/muscovy-duck/Vietnam/HN6606/2020	H5N6	2.3.4.4h	1933	645	I	V	A	G	Ata/Gta	0.542	0.458
A/muscovy-duck/Vietnam/HN6610/2020	H5N6	2.3.4.4h	1933	645	I	V	A	G	Ata/Gta	0.774	0.226
A/muscovy-duck/Vietnam/HN4715/2018	H5N6	2.3.4.4h	2001	667	I	M	T	G	atT/atG	0.903	0.097
A/duck/Vietnam/HN5149/2018	H5N6	2.3.4.4g	2044	682	I	V	A	G	Atc/Gtc	0.73	0.268
A/muscovy-duck/Vietnam/HN5048/2018	H5N6	2.3.4.4h	2211	737	K	N	G	T	aaG/aaT	0.941	0.059
A/muscovy-duck/Vietnam/HN5049/2018	H5N6	2.3.4.4h	2211	737	K	N	G	T	aaG/aaT	0.667	0.333
*AA, amino acid; NT, nucleotide

## Sheet: PB1-F2_SNPs
Supplemental Table 3: Polymorphisms in the proteins of H5N6 influenza viruses isolated in Vietnam from 2018 to 2021.
Virus	Subtype	Clade	cDNA_position	AA_position*	Consensus_AA*	Minority_AA*	Consensus_NT*	Minority_NT*	Codon	Consensus_Frequency	Minority_Frequency
A/duck/Vietnam/QN6805/2020	H5N6	2.3.4.4h	37	13	T	A	A	G	Aca/Gca	0.93	0.073
A/duck/Vietnam/HN5149/2018	H5N6	2.3.4.4g	67	23	D	N	G	A	Gat/Aat	0.909	0.09
A/duck/Vietnam/QN6808/2020	H5N6	2.3.4.4h	193	65	K	E	A	G	Aag/Gag	0.83	0.17
*AA, amino acid; NT, nucleotide

## Sheet: PA_SNPs
Supplemental Table 3: Polymorphisms in the proteins of H5N6 influenza viruses isolated in Vietnam from 2018 to 2021.
Virus	Subtype	Clade	cDNA_position	AA_position*	Consensus_AA*	Minority_AA*	Consensus_NT*	Minority_NT*	Codon	Consensus_Frequency	Minority_Frequency
A/muscovy-duck/Vietnam/HN5139/2018	H5N6	2.3.4.4h	254	85	T	I	C	T	aCa/aTa	0.923	0.077
A/duck/Vietnam/QN6805/2020	H5N6	2.3.4.4h	335	112	Y	F	A	T	tAc/tTc	0.91	0.09
A/muscovy-duck/Vietnam/HN6606/2020	H5N6	2.3.4.4h	380	127	V	A	T	C	gTc/gCc	0.969	0.028
A/muscovy-duck/Vietnam/HN4711/2018	H5N6	2.3.4.4h	398	133	E	G	A	G	gAa/gGa	0.909	0.091
A/duck/Vietnam/QN6796/2020	H5N6	2.3.4.4h	781	261	L	M	C	A	Ctg/Atg	0.971	0.028
A/duck/Vietnam/QN6808/2020	H5N6	2.3.4.4h	830	277	S	Y	C	A	tCt/tAt	0.97	0.03
A/muscovy-duck/Vietnam/HN5048/2018	H5N6	2.3.4.4h	886	296	S	G	A	G	Agc/Ggc	0.642	0.358
A/duck/Vietnam/QN6808/2020	H5N6	2.3.4.4h	933	311	M	I	G	T	atG/atT	0.78	0.22
A/muscovy-duck/Vietnam/HN5132/2018	H5N6	2.3.4.4h	932	311	M	T	T	C	aTg/aCg	0.963	0.036
A/duck/Vietnam/QN6798/2020	H5N6	2.3.4.4h	956	319	E	G	A	G	gAa/gGa	0.966	0.034
A/duck/Vietnam/QN6798/2020	H5N6	2.3.4.4h	982	328	K	E	A	G	Aag/Gag	0.943	0.057
A/duck/Vietnam/HN5145/2018	H5N6	2.3.4.4g	1121	374	M	T	T	C	aTg/aCg	0.914	0.086
A/duck/Vietnam/HN5149/2018	H5N6	2.3.4.4g	1159	387	I	V	A	G	Att/Gtt	0.973	0.027
A/duck/Vietnam/QN6808/2020	H5N6	2.3.4.4h	1214	405	S	N	G	A	aGc/aAc	0.952	0.048
A/duck/Vietnam/QN6799/2020	H5N6	2.3.4.4h	1331	444	N	T	A	C	aAc/aCc	0.97	0.027
A/duck/Vietnam/QN6805/2020	H5N6	2.3.4.4h	1342	448	A	T	G	A	Gcg/Acg	0.926	0.074
A/duck/Vietnam/HN5149/2018	H5N6	2.3.4.4g	1475	492	K	R	A	G	aAa/aGa	0.972	0.027
A/duck/Vietnam/HN5149/2018	H5N6	2.3.4.4g	1613	538	A	V	C	T	gCa/gTa	0.972	0.026
A/muscovy-duck/Vietnam/HN4713/2018	H5N6	2.3.4.4h	1613	538	V	E	T	A	gTa/gAa	0.95	0.05
A/duck/Vietnam/QN6661/2020	H5N6	2.3.4.4h	1693	565	M	V	A	G	Atg/Gtg	0.597	0.403
A/muscovy-duck/Vietnam/HN6120/2020	H5N6	2.3.4.4h	1781	594	S	N	G	A	aGc/aAc	0.972	0.028
A/duck/Vietnam/HN5149/2018	H5N6	2.3.4.4g	1808	603	R	K	G	A	aGa/aAa	0.971	0.028
A/duck/Vietnam/HN5149/2018	H5N6	2.3.4.4g	1978	660	A	S	G	T	Gct/Tct	0.787	0.212
A/muscovy-duck/Vietnam/HN4714/2018	H5N6	2.3.4.4h	2005	669	V	I	G	A	Gtt/Att	0.623	0.377
A/muscovy-duck/Vietnam/HN4715/2018	H5N6	2.3.4.4h	2005	669	V	I	G	A	Gtt/Att	0.55	0.45
A/muscovy-duck/Vietnam/HN4716/2018	H5N6	2.3.4.4h	2005	669	I	V	A	G	Att/Gtt	0.7	0.3
A/muscovy-duck/Vietnam/HN4720/2018	H5N6	2.3.4.4h	2005	669	I	V	A	G	Att/Gtt	0.663	0.337
A/duck/Vietnam/QN6519/2020	H5N6	2.3.4.4h	2038	680	T	A	A	G	Acc/Gcc	0.89	0.112
A/duck/Vietnam/HN5149/2018	H5N6	2.3.4.4g	2147	716	K	R	A	G	aAa/aGa	0.974	0.026
*AA, amino acid; NT, nucleotide

## Sheet: PA-X_SNPs
Supplemental Table 3: Polymorphisms in the proteins of H5N6 influenza viruses isolated in Vietnam from 2018 to 2021.
Virus	Subtype	Clade	cDNA_position	AA_position*	Consensus_AA*	Minority_AA*	Consensus_NT*	Minority_NT*	Codon	Consensus_Frequency	Minority_Frequency
A/muscovy-duck/Vietnam/HN5139/2018	H5N6	2.3.4.4h	254	85	T	I	C	T	aCa/aTa	0.923	0.077
A/duck/Vietnam/QN6805/2020	H5N6	2.3.4.4h	335	112	Y	F	A	T	tAc/tTc	0.91	0.09
A/muscovy-duck/Vietnam/HN6606/2020	H5N6	2.3.4.4h	380	127	V	A	T	C	gTc/gCc	0.969	0.028
A/muscovy-duck/Vietnam/HN4711/2018	H5N6	2.3.4.4h	398	133	E	G	A	G	gAa/gGa	0.909	0.091
A/duck/Vietnam/QN6805/2020	H5N6	2.3.4.4h	578	193	S	N	G	A	aGt/aAt	0.934	0.066
A/muscovy-duck/Vietnam/HN5137/2018	H5N6	2.3.4.4h	617	206	K	R	A	G	aAa/aGa	0.973	0.027
A/duck/Vietnam/HN5144/2018	H5N6	2.3.4.4g	635	212	E	A	A	C	gAa/gCa	0.854	0.145
A/duck/Vietnam/HN5148/2018	H5N6	2.3.4.4g	635	212	E	A	A	C	gAa/gCa	0.853	0.147
A/duck/Vietnam/HN5149/2018	H5N6	2.3.4.4g	635	212	E	A	A	C	gAa/gCa	0.972	0.027
A/duck/Vietnam/HN5148/2018	H5N6	2.3.4.4g	719	240	A	V	C	T	gCt/gTt	0.935	0.064
A/duck/Vietnam/QN6661/2020	H5N6	2.3.4.4h	752	251	K	R	A	G	aAg/aGg	0.797	0.203
A/muscovy-duck/Vietnam/HN4713/2018	H5N6	2.3.4.4h	752	251	R	K	G	A	aGg/aAg	0.965	0.035
*AA, amino acid; NT, nucleotide

## Sheet: HA_H5_SNPs
Supplemental Table 3: Polymorphisms in the proteins of H5N6 influenza viruses isolated in Vietnam from 2018 to 2021.
Virus	Subtype	Clade	cDNA_ position	AA_position (full-length)*	AA_position (mature HA)*	Consensus_ AA*	Minority_ AA*	Consensus_ NT*	Minority_ NT*	Codon	Consensus_ Frequency	Minority_ Frequency
A/muscovy-duck/Vietnam/HN6113/2020	H5N6	2.3.4.4h	37	13	n/a	L	V	C	G	Ctt/Gtt	0.965	0.034
A/muscovy-duck/Vietnam/HN6114/2020	H5N6	2.3.4.4h	37	13	n/a	L	V	C	G	Ctt/Gtt	0.936	0.062
A/muscovy-duck/Vietnam/HN6115/2020	H5N6	2.3.4.4h	37	13	n/a	L	V	C	G	Ctt/Gtt	0.962	0.038
A/muscovy-duck/Vietnam/HN6111/2020	H5N6	2.3.4.4h	137	46	30	R	Q	G	A	cGa/cAa	0.965	0.035
A/duck/Vietnam/HN5149/2018	H5N6	2.3.4.4g	167	56	40	R	K	G	A	aGg/aAg	0.961	0.038
A/duck/Vietnam/HN5142/2018	H5N6	2.3.4.4g	199	67	51	I	L	A	C	Att/Ctt	0.927	0.072
A/duck/Vietnam/HN5143/2018	H5N6	2.3.4.4g	199	67	51	I	L	A	C	Att/Ctt	0.956	0.044
A/duck/Vietnam/HN5147/2018	H5N6	2.3.4.4g	199	67	51	I	L	A	C	Att/Ctt	0.975	0.025
A/duck/Vietnam/HN5149/2018	H5N6	2.3.4.4g	199	67	51	I	L	A	C	Att/Ctt	0.97	0.03
A/muscovy-duck/Vietnam/HN5048/2018	H5N6	2.3.4.4h	199	67	51	I	L	A	C	Att/Ctt	0.972	0.026
A/duck/Vietnam/HN5149/2018	H5N6	2.3.4.4g	208	70	54	D	N	G	A	Gat/Aat	0.971	0.028
A/duck/Vietnam/HN5142/2018	H5N6	2.3.4.4g	250	84	68	D	N	G	A	Gac/Aac	0.932	0.068
A/duck/Vietnam/HN5149/2018	H5N6	2.3.4.4g	264	88	72	R	S	A	C	agA/agC	0.974	0.025
A/duck/Vietnam/QN6519/2020	H5N6	2.3.4.4h	263	88	72	S	N	G	A	aGt/aAt	0.633	0.363
A/muscovy-duck/Vietnam/HN4714/2018	H5N6	2.3.4.4h	406	136	120	R	G	A	G	Agg/Ggg	0.67	0.329
A/muscovy-duck/Vietnam/HN4715/2018	H5N6	2.3.4.4h	406	136	120	R	G	A	G	Agg/Ggg	0.766	0.234
A/muscovy-duck/Vietnam/HN4716/2018	H5N6	2.3.4.4h	406	136	120	R	G	A	G	Agg/Ggg	0.887	0.112
A/muscovy-duck/Vietnam/HN4720/2018	H5N6	2.3.4.4h	406	136	120	R	G	A	G	Agg/Ggg	0.79	0.209
A/muscovy-duck/Vietnam/HN4713/2018	H5N6	2.3.4.4h	427	144	128	S	P	T	C	Tca/Cca	0.973	0.027
A/muscovy-duck/Vietnam/HN4715/2018	H5N6	2.3.4.4h	445	150	134	A	S	G	T	Gca/Tca	0.96	0.03
A/muscovy-duck/Vietnam/HN4856/2018	H5N6	2.3.4.4h	452	152	136	P	L	C	T	cCa/cTa	0.948	0.051
A/muscovy-duck/Vietnam/HN5048/2018	H5N6	2.3.4.4h	556	187	171	N	D	A	G	Aat/Gat	0.545	0.455
A/muscovy-duck/Vietnam/HN5049/2018	H5N6	2.3.4.4h	556	187	171	N	D	A	G	Aat/Gat	0.813	0.187
A/duck/Vietnam/HN5080/2018	H5N6	2.3.4.4h	572	192	176	W	L	G	T	tGg/tTg	0.867	0.133
A/duck/Vietnam/QN6519/2020	H5N6	2.3.4.4h	572	192	176	W	L	G	T	tGg/tTg	0.777	0.223
A/muscovy-duck/Vietnam/HN4858/2018	H5N6	2.3.4.4h	572	192	176	W	L	G	T	tGg/tTg	0.96	0.039
A/muscovy-duck/Vietnam/HN5048/2018	H5N6	2.3.4.4h	572	192	176	W	L	G	T	tGg/tTg	0.852	0.148
A/muscovy-duck/Vietnam/HN5049/2018	H5N6	2.3.4.4h	572	192	176	W	L	G	T	tGg/tTg	0.975	0.025
A/muscovy-duck/Vietnam/HN6111/2020	H5N6	2.3.4.4h	572	192	176	W	L	G	T	tGg/tTg	0.969	0.028
A/muscovy-duck/Vietnam/HN6113/2020	H5N6	2.3.4.4h	572	192	176	W	L	G	T	tGg/tTg	0.926	0.074
A/muscovy-duck/Vietnam/HN6114/2020	H5N6	2.3.4.4h	572	192	176	W	L	G	T	tGg/tTg	0.927	0.072
A/muscovy-duck/Vietnam/HN6115/2020	H5N6	2.3.4.4h	572	192	176	W	L	G	T	tGg/tTg	0.947	0.053
A/muscovy-duck/Vietnam/HN6120/2020	H5N6	2.3.4.4h	572	192	176	W	L	G	T	tGg/tTg	0.949	0.05
A/duck/Vietnam/QN6798/2020	H5N6	2.3.4.4h	621	208	192	K	N	G	T	aaG/aaT	0.96	0.039
A/duck/Vietnam/QN6659/2020	H5N6	2.3.4.4h	712	239	223	R	G	C	G	Cgt/Ggt	0.957	0.042
A/muscovy-duck/Vietnam/HN4711/2018	H5N6	2.3.4.4h	758	254	238	A	G	C	G	gCa/gGa	0.967	0.032
A/muscovy-duck/Vietnam/HN4713/2018	H5N6	2.3.4.4h	758	254	238	A	G	C	G	gCa/gGa	0.959	0.04
A/muscovy-duck/Vietnam/HN4715/2018	H5N6	2.3.4.4h	758	254	238	A	G	C	G	gCa/gGa	0.963	0.035
A/muscovy-duck/Vietnam/HN4716/2018	H5N6	2.3.4.4h	758	254	238	A	G	C	G	gCa/gGa	0.949	0.051
A/muscovy-duck/Vietnam/HN4711/2018	H5N6	2.3.4.4h	760	255	239	I	F	A	T	Atc/Ttc	0.965	0.033
A/muscovy-duck/Vietnam/HN4713/2018	H5N6	2.3.4.4h	760	255	239	I	F	A	T	Atc/Ttc	0.96	0.04
A/muscovy-duck/Vietnam/HN4715/2018	H5N6	2.3.4.4h	760	255	239	I	F	A	T	Atc/Ttc	0.964	0.035
A/muscovy-duck/Vietnam/HN4716/2018	H5N6	2.3.4.4h	760	255	239	I	F	A	T	Atc/Ttc	0.947	0.052
A/muscovy-duck/Vietnam/HN6606/2020	H5N6	2.3.4.4h	771	258	242	E	D	G	T	gaG/gaT	0.569	0.43
A/muscovy-duck/Vietnam/HN6610/2020	H5N6	2.3.4.4h	771	258	242	E	D	G	T	gaG/gaT	0.773	0.227
A/muscovy-duck/Vietnam/HN5139/2018	H5N6	2.3.4.4h	776	260	244	N	S	A	G	aAt/aGt	0.919	0.081
A/duck/Vietnam/HN5143/2018	H5N6	2.3.4.4g	847	283	267	S	G	A	G	Agt/Ggt	0.889	0.111
A/duck/Vietnam/HN4721/2018	H5N6	2.3.4.4h	869	291	275	N	S	A	G	aAc/aGc	0.952	0.047
A/duck/Vietnam/QN6806/2020	H5N6	2.3.4.4h	908	304	288	S	N	G	A	aGt/aAt	0.969	0.031
A/muscovy-duck/Vietnam/HN4716/2018	H5N6	2.3.4.4h	1069	358	342	G	*	G	T	Gga/Tga	0.969	0.031
A/muscovy-duck/Vietnam/HN6608/2020	H5N6	2.3.4.4h	1181	395	379	N	T	A	C	aAc/aCc	0.938	0.061
A/duck/Vietnam/HN5149/2018	H5N6	2.3.4.4g	1250	416	400	N	S	A	G	aAc/aGc	0.969	0.029
A/duck/Vietnam/QN6658/2020	H5N6	2.3.4.4h	1310	438	422	T	S	C	G	aCt/aGt	0.872	0.128
A/muscovy-duck/Vietnam/HN6608/2020	H5N6	2.3.4.4h	1349	451	435	R	I	G	T	aGa/aTa	0.969	0.029
A/muscovy-duck/Vietnam/HN6115/2020	H5N6	2.3.4.4h	1407	470	454	Q	H	G	T	caG/caT	0.967	0.033
A/duck/Vietnam/QN6739/2020	H5N6	2.3.4.4h	1423	476	460	K	E	A	G	Aag/Gag	0.922	0.078
A/duck/Vietnam/QN6730/2020	H5N6	2.3.4.4h	1435	480	464	N	D	A	G	Aat/Gat	0.974	0.026
A/muscovy-duck/Vietnam/HN5046/2018	H5N6	2.3.4.4h	1479	494	478	M	I	G	A	atG/atA	0.958	0.042
A/duck/Vietnam/QN6519/2020	H5N6	2.3.4.4h	1505	503	487	D	A	A	C	gAc/gCc	0.745	0.255
A/duck/Vietnam/QN6659/2020	H5N6	2.3.4.4h	1506	503	487	D	E	C	A	gaC/gaA	0.966	0.034
A/duck/Vietnam/QN6661/2020	H5N6	2.3.4.4h	1526	510	494	E	G	A	G	gAa/gGa	0.686	0.314
A/duck/Vietnam/HN5149/2018	H5N6	2.3.4.4g	1628	543	527	A	V	C	T	gCa/gTa	0.974	0.025
*AA, amino acid; NT, nucleotide

## Sheet: NP_SNPs
Supplemental Table 3: Polymorphisms in the proteins of H5N6 influenza viruses isolated in Vietnam from 2018 to 2021.
Virus	Subtype	Clade	cDNA_position	AA_position*	Consensus_AA*	Minority_AA*	Consensus_NT*	Minority_NT*	Codon	Consensus_Frequency	Minority_Frequency
A/muscovy-duck/Vietnam/HN4858/2018	H5N6	2.3.4.4h	61	21	N	D	A	G	Aat/Gat	0.966	0.034
A/muscovy-duck/Vietnam/HN4857/2018	H5N6	2.3.4.4h	185	62	T	I	C	T	aCa/aTa	0.962	0.038
A/muscovy-duck/Vietnam/HN6113/2020	H5N6	2.3.4.4h	232	78	Y	H	T	C	Tat/Cat	0.963	0.035
A/duck/Vietnam/HN5142/2018	H5N6	2.3.4.4g	350	117	R	K	G	A	aGg/aAg	0.94	0.055
A/duck/Vietnam/QN6661/2020	H5N6	2.3.4.4h	602	201	I	T	T	C	aTt/aCt	0.969	0.028
A/muscovy-duck/Vietnam/HN4718/2018	H5N6	2.3.4.4h	956	319	N	S	A	G	aAt/aGt	0.971	0.029
A/muscovy-duck/Vietnam/HN5047/2018	H5N6	2.3.4.4h	1021	341	L	I	C	A	Ctc/Atc	0.827	0.173
A/duck/Vietnam/HN5144/2018	H5N6	2.3.4.4g	1031	344	L	S	T	C	tTa/tCa	0.79	0.205
A/duck/Vietnam/HN5148/2018	H5N6	2.3.4.4g	1031	344	L	S	T	C	tTa/tCa	0.805	0.194
A/duck/Vietnam/HN5149/2018	H5N6	2.3.4.4g	1031	344	L	S	T	C	tTa/tCa	0.951	0.048
A/muscovy-duck/Vietnam/HN4713/2018	H5N6	2.3.4.4h	1054	352	V	I	G	A	Gtt/Att	0.857	0.143
A/muscovy-duck/Vietnam/HN4718/2018	H5N6	2.3.4.4h	1054	352	V	I	G	A	Gtt/Att	0.96	0.04
A/muscovy-duck/Vietnam/HN4716/2018	H5N6	2.3.4.4h	1054	352	V	I	G	A	Gtt/Att	0.97	0.025
A/duck/Vietnam/HN6893/2021	H5N6	2.3.4.4h	1117	373	T	A	A	G	Aca/Gca	0.964	0.036
*AA, amino acid; NT, nucleotide

## Sheet: NA_N6_SNPs
Supplemental Table 3: Polymorphisms in the proteins of H5N6 influenza viruses isolated in Vietnam from 2018 to 2021.
Virus	Subtype	H5_Subclade	cDNA_position	AA_position (NA∆58-68)*	AA_position (no deletion)*	Consensus_AA*	Minority_AA*	Consensus_NT*	Minority_NT*	Codon	Consensus_Frequency	Minority_Frequency
A/duck/Vietnam/HN5149/2018	H5N6	2.3.4.4g	70	24	24	V	L	G	T	Gta/Tta	0.79	0.2
A/duck/Vietnam/QN6798/2020	H5N6	2.3.4.4h	133	45	45	I	V	A	G	Ata/Gta	0.962	0.037
A/muscovy-duck/Vietnam/HN4711/2018	H5N6	2.3.4.4h	221	74	85	L	P	T	C	cTc/cCc	0.919	0.08
A/muscovy-duck/Vietnam/HN4713/2018	H5N6	2.3.4.4h	221	74	85	L	P	T	C	cTc/cCc	0.906	0.094
A/muscovy-duck/Vietnam/HN4714/2018	H5N6	2.3.4.4h	221	74	85	L	P	T	C	cTc/cCc	0.975	0.025
A/muscovy-duck/Vietnam/HN4715/2018	H5N6	2.3.4.4h	221	74	85	L	P	T	C	cTc/cCc	0.891	0.109
A/muscovy-duck/Vietnam/HN4716/2018	H5N6	2.3.4.4h	221	74	85	L	P	T	C	cTc/cCc	0.804	0.196
A/muscovy-duck/Vietnam/HN4718/2018	H5N6	2.3.4.4h	221	74	85	L	P	T	C	cTc/cCc	0.922	0.078
A/muscovy-duck/Vietnam/HN4714/2018	H5N6	2.3.4.4h	245	82	93	E	G	A	G	gAa/gGa	0.801	0.199
A/muscovy-duck/Vietnam/HN4715/2018	H5N6	2.3.4.4h	245	82	93	E	G	A	G	gAa/gGa	0.835	0.165
A/muscovy-duck/Vietnam/HN4716/2018	H5N6	2.3.4.4h	245	82	93	E	G	A	G	gAa/gGa	0.922	0.078
A/muscovy-duck/Vietnam/HN4720/2018	H5N6	2.3.4.4h	245	82	93	E	G	A	G	gAa/gGa	0.842	0.158
A/duck/Vietnam/HN5149/2018	H5N6	2.3.4.4g	272	91	102	R	K	G	A	aGa/aAa	0.973	0.027
A/duck/Vietnam/QN6661/2020	H5N6	2.3.4.4h	313	105	116	I	V	A	G	Atc/Gtc	0.636	0.364
A/duck/Vietnam/HN5149/2018	H5N6	2.3.4.4g	395	132	143	R	Q	G	A	cGa/cAa	0.971	0.028
A/duck/Vietnam/QN6739/2020	H5N6	2.3.4.4h	436	146	157	T	A	A	G	Act/Gct	0.632	0.367
A/duck/Vietnam/QN6519/2020	H5N6	2.3.4.4h	511	171	182	T	A	A	G	Acg/Gcg	0.698	0.301
A/muscovy-duck/Vietnam/HN6610/2020	H5N6	2.3.4.4h	633	211	222	N	K	C	G	aaC/aaG	0.531	0.468
A/duck/Vietnam/HN5149/2018	H5N6	2.3.4.4g	764	255	266	I	T	T	C	aTt/aCt	0.971	0.028
A/duck/Vietnam/HN5149/2018	H5N6	2.3.4.4g	839	280	291	A	V	C	T	gCa/gTa	0.954	0.045
A/duck/Vietnam/HN5149/2018	H5N6	2.3.4.4g	896	299	310	M	R	T	G	aTg/aGg	0.956	0.044
A/duck/Vietnam/HN5149/2018	H5N6	2.3.4.4g	1000, 1001	334	345	G	N	GGc	AAc	GGc/AAc	97%,97%	3%,3%
A/duck/Vietnam/QN6805/2020	H5N6	2.3.4.4h	1000	334	345	D	N	G	A	Gac/Aac	0.774	0.225
A/muscovy-duck/Vietnam/HN4857/2018	H5N6	2.3.4.4h	1038	346	357	D	E	C	A	gaC/gaA	0.972	0.028
A/duck/Vietnam/HN5149/2018	H5N6	2.3.4.4g	1121	374	385	T	I	C	T	aCc/aTc	0.967	0.033
A/duck/Vietnam/HN5149/2018	H5N6	2.3.4.4g	1125	375	386	E	D	A	C	gaA/gaC	0.968	0.031
A/muscovy-duck/Vietnam/HN6610/2020	H5N6	2.3.4.4h	1138	380	391	P	S	C	T	Cca/Tca	0.765	0.233
A/duck/Vietnam/HN5149/2018	H5N6	2.3.4.4g	1142	381	392	T	I	C	T	aCc/aTc	0.968	0.031
A/duck/Vietnam/HN5080/2018	H5N6	2.3.4.4h	1221	407	418	E	D	G	T	gaG/gaT	0.956	0.044
A/duck/Vietnam/HN5142/2018	H5N6	2.3.4.4g	1221	407	418	E	D	A	T	gaA/gaT	0.969	0.027
A/muscovy-duck/Vietnam/HN4711/2018	H5N6	2.3.4.4h	1221	407	418	E	D	G	T	gaG/gaT	0.949	0.049
A/muscovy-duck/Vietnam/HN4713/2018	H5N6	2.3.4.4h	1221	407	418	E	D	G	T	gaG/gaT	0.956	0.044
A/muscovy-duck/Vietnam/HN4714/2018	H5N6	2.3.4.4h	1221	407	418	E	D	G	T	gaG/gaT	0.955	0.044
A/muscovy-duck/Vietnam/HN4715/2018	H5N6	2.3.4.4h	1221	407	418	E	D	G	T	gaG/gaT	0.931	0.068
A/muscovy-duck/Vietnam/HN4716/2018	H5N6	2.3.4.4h	1221	407	418	E	D	G	T	gaG/gaT	0.946	0.052
A/muscovy-duck/Vietnam/HN4718/2018	H5N6	2.3.4.4h	1221	407	418	E	D	G	T	gaG/gaT	0.966	0.033
A/muscovy-duck/Vietnam/HN4719/2018	H5N6	2.3.4.4h	1221	407	418	E	D	G	T	gaG/gaT	0.962	0.036
A/muscovy-duck/Vietnam/HN4858/2018	H5N6	2.3.4.4h	1221	407	418	E	D	G	T	gaG/gaT	0.935	0.065
A/muscovy-duck/Vietnam/HN5046/2018	H5N6	2.3.4.4h	1221	407	418	E	D	G	T	gaG/gaT	0.969	0.027
A/muscovy-duck/Vietnam/HN5047/2018	H5N6	2.3.4.4h	1221	407	418	E	D	G	T	gaG/gaT	0.962	0.037
A/muscovy-duck/Vietnam/HN5048/2018	H5N6	2.3.4.4h	1221	407	418	E	D	G	T	gaG/gaT	0.928	0.072
A/muscovy-duck/Vietnam/HN6111/2020	H5N6	2.3.4.4h	1221	407	418	E	D	G	T	gaG/gaT	0.974	0.025
A/muscovy-duck/Vietnam/HN6113/2020	H5N6	2.3.4.4h	1221	407	418	E	D	G	T	gaG/gaT	0.944	0.055
A/muscovy-duck/Vietnam/HN6114/2020	H5N6	2.3.4.4h	1221	407	418	E	D	G	T	gaG/gaT	0.955	0.044
A/muscovy-duck/Vietnam/HN6115/2020	H5N6	2.3.4.4h	1221	407	418	E	D	G	T	gaG/gaT	0.955	0.043
A/muscovy-duck/Vietnam/HN6119/2020	H5N6	2.3.4.4h	1221	407	418	E	D	G	T	gaG/gaT	0.966	0.032
A/muscovy-duck/Vietnam/HN6120/2020	H5N6	2.3.4.4h	1221	407	418	E	D	G	T	gaG/gaT	0.948	0.051
A/muscovy-duck/Vietnam/HN6607/2020	H5N6	2.3.4.4h	1221	407	418	E	D	G	T	gaG/gaT	0.971	0.028
A/muscovy-duck/Vietnam/HN6609/2020	H5N6	2.3.4.4h	1221	407	418	E	D	G	T	gaG/gaT	0.969	0.028
A/duck/Vietnam/HN5080/2018	H5N6	2.3.4.4h	1224	408	419	C	*	C	A	tgC/tgA	0.954	0.045
A/duck/Vietnam/HN5142/2018	H5N6	2.3.4.4g	1224	408	419	C	*	C	A	tgC/tgA	0.972	0.028
A/muscovy-duck/Vietnam/HN4711/2018	H5N6	2.3.4.4h	1224	408	419	C	*	C	A	tgC/tgA	0.948	0.051
A/muscovy-duck/Vietnam/HN4713/2018	H5N6	2.3.4.4h	1224	408	419	C	*	C	A	tgC/tgA	0.954	0.045
A/muscovy-duck/Vietnam/HN4714/2018	H5N6	2.3.4.4h	1224	408	419	C	*	C	A	tgC/tgA	0.954	0.045
A/muscovy-duck/Vietnam/HN4715/2018	H5N6	2.3.4.4h	1224	408	419	C	*	C	A	tgC/tgA	0.928	0.072
A/muscovy-duck/Vietnam/HN4716/2018	H5N6	2.3.4.4h	1224	408	419	C	*	C	A	tgC/tgA	0.945	0.054
A/muscovy-duck/Vietnam/HN4718/2018	H5N6	2.3.4.4h	1224	408	419	C	*	C	A	tgC/tgA	0.967	0.033
A/muscovy-duck/Vietnam/HN4719/2018	H5N6	2.3.4.4h	1224	408	419	C	*	C	A	tgC/tgA	0.963	0.037
A/muscovy-duck/Vietnam/HN4858/2018	H5N6	2.3.4.4h	1224	408	419	C	*	C	A	tgC/tgA	0.934	0.065
A/muscovy-duck/Vietnam/HN5046/2018	H5N6	2.3.4.4h	1224	408	419	C	*	C	A	tgC/tgA	0.973	0.027
A/muscovy-duck/Vietnam/HN5047/2018	H5N6	2.3.4.4h	1224	408	419	C	*	C	A	tgC/tgA	0.962	0.038
A/muscovy-duck/Vietnam/HN5048/2018	H5N6	2.3.4.4h	1224	408	419	C	*	C	A	tgC/tgA	0.925	0.074
A/muscovy-duck/Vietnam/HN5049/2018	H5N6	2.3.4.4h	1224	408	419	C	*	C	A	tgC/tgA	0.974	0.025
A/muscovy-duck/Vietnam/HN6111/2020	H5N6	2.3.4.4h	1224	408	419	C	*	C	A	tgC/tgA	0.97	0.028
A/muscovy-duck/Vietnam/HN6113/2020	H5N6	2.3.4.4h	1224	408	419	C	*	C	A	tgC/tgA	0.943	0.056
A/muscovy-duck/Vietnam/HN6114/2020	H5N6	2.3.4.4h	1224	408	419	C	*	C	A	tgC/tgA	0.955	0.045
A/muscovy-duck/Vietnam/HN6115/2020	H5N6	2.3.4.4h	1224	408	419	C	*	C	A	tgC/tgA	0.954	0.045
A/muscovy-duck/Vietnam/HN6119/2020	H5N6	2.3.4.4h	1224	408	419	C	*	C	A	tgC/tgA	0.966	0.034
A/muscovy-duck/Vietnam/HN6120/2020	H5N6	2.3.4.4h	1224	408	419	C	*	C	A	tgC/tgA	0.944	0.055
A/muscovy-duck/Vietnam/HN6607/2020	H5N6	2.3.4.4h	1224	408	419	C	*	C	A	tgC/tgA	0.968	0.031
A/muscovy-duck/Vietnam/HN6609/2020	H5N6	2.3.4.4h	1224	408	419	C	*	C	A	tgC/tgA	0.972	0.028
A/duck/Vietnam/HN5080/2018	H5N6	2.3.4.4h	1225, 1226	409	420	F	S	TTc	AGc	TTc/AGc	95%,95%	5%,5%
A/duck/Vietnam/HN5142/2018	H5N6	2.3.4.4g	1225, 1226	409	420	F	S	TTc	AGc	TTc/AGc	97%,97%	3%,3%
A/duck/Vietnam/HN5143/2018	H5N6	2.3.4.4g	1225, 1226	409	420	F	S	TTc	AGc	TTc/AGc	97%,97%	3%,3%
A/muscovy-duck/Vietnam/HN4711/2018	H5N6	2.3.4.4h	1225, 1226	409	420	F	S	TTc	AGc	TTc/AGc	95%,95%	5%,5%
A/muscovy-duck/Vietnam/HN4713/2018	H5N6	2.3.4.4h	1225, 1226	409	420	F	S	TTc	AGc	TTc/AGc	95%,95%	5%,5%
A/muscovy-duck/Vietnam/HN4714/2018	H5N6	2.3.4.4h	1225, 1226	409	420	F	S	TTc	AGc	TTc/AGc	95%,95%	5%,5%
A/muscovy-duck/Vietnam/HN4715/2018	H5N6	2.3.4.4h	1225, 1226	409	420	F	S	TTc	AGc	TTc/AGc	93%,93%	7%,7%
A/muscovy-duck/Vietnam/HN4716/2018	H5N6	2.3.4.4h	1225, 1226	409	420	F	S	TTc	AGc	TTc/AGc	95%,95%	5%,5%
A/muscovy-duck/Vietnam/HN4718/2018	H5N6	2.3.4.4h	1225, 1226	409	420	F	S	TTc	AGc	TTc/AGc	97%,97%	3%,3%
A/muscovy-duck/Vietnam/HN4719/2018	H5N6	2.3.4.4h	1225, 1226	409	420	F	S	TTc	AGc	TTc/AGc	96%,96%	4%,4%
A/muscovy-duck/Vietnam/HN4858/2018	H5N6	2.3.4.4h	1225, 1226	409	420	F	S	TTc	AGc	TTc/AGc	93%,94%	7%,6%
A/muscovy-duck/Vietnam/HN5046/2018	H5N6	2.3.4.4h	1225, 1226	409	420	F	S	TTc	AGc	TTc/AGc	97%,97%	3%,3%
A/muscovy-duck/Vietnam/HN5047/2018	H5N6	2.3.4.4h	1225, 1226	409	420	F	S	TTc	AGc	TTc/AGc	96%,96%	4%,4%
A/muscovy-duck/Vietnam/HN5048/2018	H5N6	2.3.4.4h	1225, 1226	409	420	F	S	TTc	AGc	TTc/AGc	93%,93%	7%,7%
A/muscovy-duck/Vietnam/HN5049/2018	H5N6	2.3.4.4h	1225, 1226	409	420	F	S	TTc	AGc	TTc/AGc	97%,97%	3%,3%
A/muscovy-duck/Vietnam/HN6111/2020	H5N6	2.3.4.4h	1225, 1226	409	420	F	S	TTc	AGc	TTc/AGc	97%,97%	3%,3%
A/muscovy-duck/Vietnam/HN6113/2020	H5N6	2.3.4.4h	1225, 1226	409	420	F	S	TTc	AGc	TTc/AGc	95%,95%	5%,5%
A/muscovy-duck/Vietnam/HN6114/2020	H5N6	2.3.4.4h	1225, 1226	409	420	F	S	TTc	AGc	TTc/AGc	95%,95%	5%,5%
A/muscovy-duck/Vietnam/HN6115/2020	H5N6	2.3.4.4h	1225, 1226	409	420	F	S	TTc	AGc	TTc/AGc	95%,95%	5%,5%
A/muscovy-duck/Vietnam/HN6119/2020	H5N6	2.3.4.4h	1225, 1226	409	420	F	S	TTc	AGc	TTc/AGc	97%,97%	3%,3%
A/muscovy-duck/Vietnam/HN6120/2020	H5N6	2.3.4.4h	1225, 1226	409	420	F	S	TTc	AGc	TTc/AGc	95%,95%	5%,5%
A/muscovy-duck/Vietnam/HN6607/2020	H5N6	2.3.4.4h	1225, 1226	409	420	F	S	TTc	AGc	TTc/AGc	97%,97%	3%,3%
A/muscovy-duck/Vietnam/HN6609/2020	H5N6	2.3.4.4h	1225, 1226	409	420	F	S	TTc	AGc	TTc/AGc	97%,97%	3%,3%
A/duck/Vietnam/HN5080/2018	H5N6	2.3.4.4h	1229	410	421	N	T	A	C	aAt/aCt	0.955	0.044
A/duck/Vietnam/HN5142/2018	H5N6	2.3.4.4g	1229	410	421	N	I	A	T	aAt/aTt	0.972	0.027
A/muscovy-duck/Vietnam/HN4711/2018	H5N6	2.3.4.4h	1229	410	421	N	T	A	C	aAt/aCt	0.949	0.05
A/muscovy-duck/Vietnam/HN4713/2018	H5N6	2.3.4.4h	1229	410	421	N	T	A	C	aAt/aCt	0.955	0.045
A/muscovy-duck/Vietnam/HN4714/2018	H5N6	2.3.4.4h	1229	410	421	N	T	A	C	aAt/aCt	0.955	0.045
A/muscovy-duck/Vietnam/HN4715/2018	H5N6	2.3.4.4h	1229	410	421	N	T	A	C	aAt/aCt	0.93	0.07
A/muscovy-duck/Vietnam/HN4716/2018	H5N6	2.3.4.4h	1229	410	421	N	T	A	C	aAt/aCt	0.947	0.052
A/muscovy-duck/Vietnam/HN4718/2018	H5N6	2.3.4.4h	1229	410	421	N	T	A	C	aAt/aCt	0.968	0.032
A/muscovy-duck/Vietnam/HN4719/2018	H5N6	2.3.4.4h	1229	410	421	N	T	A	C	aAt/aCt	0.963	0.037
A/muscovy-duck/Vietnam/HN4858/2018	H5N6	2.3.4.4h	1229	410	421	N	T	A	C	aAt/aCt	0.934	0.065
A/muscovy-duck/Vietnam/HN5046/2018	H5N6	2.3.4.4h	1229	410	421	N	T	A	C	aAt/aCt	0.972	0.026
A/muscovy-duck/Vietnam/HN5047/2018	H5N6	2.3.4.4h	1229	410	421	N	T	A	C	aAt/aCt	0.963	0.037
A/muscovy-duck/Vietnam/HN5048/2018	H5N6	2.3.4.4h	1229	410	421	N	T	A	C	aAt/aCt	0.926	0.073
A/muscovy-duck/Vietnam/HN5049/2018	H5N6	2.3.4.4h	1229	410	421	N	T	A	C	aAt/aCt	0.975	0.025
A/muscovy-duck/Vietnam/HN6111/2020	H5N6	2.3.4.4h	1229	410	421	N	T	A	C	aAt/aCt	0.974	0.025
A/muscovy-duck/Vietnam/HN6113/2020	H5N6	2.3.4.4h	1229	410	421	N	T	A	C	aAt/aCt	0.944	0.056
A/muscovy-duck/Vietnam/HN6114/2020	H5N6	2.3.4.4h	1229	410	421	N	T	A	C	aAt/aCt	0.954	0.045
A/muscovy-duck/Vietnam/HN6115/2020	H5N6	2.3.4.4h	1229	410	421	N	T	A	C	aAt/aCt	0.954	0.045
A/muscovy-duck/Vietnam/HN6119/2020	H5N6	2.3.4.4h	1229	410	421	N	T	A	C	aAt/aCt	0.967	0.033
A/muscovy-duck/Vietnam/HN6120/2020	H5N6	2.3.4.4h	1229	410	421	N	T	A	C	aAt/aCt	0.945	0.053
A/muscovy-duck/Vietnam/HN6607/2020	H5N6	2.3.4.4h	1229	410	421	N	T	A	C	aAt/aCt	0.971	0.029
A/muscovy-duck/Vietnam/HN6609/2020	H5N6	2.3.4.4h	1229	410	421	N	T	A	C	aAt/aCt	0.97	0.028
A/duck/Vietnam/QN6805/2020	H5N6	2.3.4.4h	1274	425	436	S	N	G	A	aGt/aAt	0.799	0.2
A/duck/Vietnam/QN6798/2020	H5N6	2.3.4.4h	1360	454	465	E	K	G	A	Gaa/Aaa	0.953	0.047

## Sheet: M1_SNPs
Supplemental Table 3: Polymorphisms in the proteins of H5N6 influenza viruses isolated in Vietnam from 2018 to 2021.
Virus	Subtype	Clade	cDNA_position	AA_position*	Consensus_AA*	Minority_AA*	Consensus_NT*	Minority_NT*	Codon	Consensus_Frequency	Minority_Frequency
A/muscovy-duck/Vietnam/HN6884/2021	H5N6	2.3.4.4h	101	34	G	V	G	T	gGa/gTa	0.964	0.036
A/duck/Vietnam/QN6798/2020	H5N6	2.3.4.4h	109	37	A	T	G	A	Gct/Act	0.926	0.074
A/duck/Vietnam/QN6739/2020	H5N6	2.3.4.4h	393	131	M	I	G	A	atG/atA	0.611	0.388
A/muscovy-duck/Vietnam/HN6120/2020	H5N6	2.3.4.4h	544	182	A	T	G	A	Gcc/Acc	0.969	0.03
A/duck/Vietnam/HN5149/2018	H5N6	2.3.4.4g	583	195	S	A	T	G	Tca/Gca	0.957	0.043
A/duck/Vietnam/HN5144/2018	H5N6	2.3.4.4g	679	227	A	T	G	A	Gct/Act	0.847	0.153
A/duck/Vietnam/HN5148/2018	H5N6	2.3.4.4g	679	227	A	T	G	A	Gct/Act	0.831	0.168
A/duck/Vietnam/HN5149/2018	H5N6	2.3.4.4g	679	227	A	T	G	A	Gct/Act	0.957	0.043
*AA, amino acid; NT, nucleotide

## Sheet: M2_SNPs
Supplemental Table 3: Polymorphisms in the proteins of H5N6 influenza viruses isolated in Vietnam from 2018 to 2021.
Virus	Subtype	Clade	cDNA_position	AA_position*	Consensus_AA*	Minority_AA*	Consensus_NT*	Minority_NT*	Codon	Consensus_Frequency	Minority_Frequency
A/duck/Vietnam/HN5144/2018	H5N6	2.3.4.4g	41	14	E	G	A	G	gAa/gGa	0.836	0.163
A/duck/Vietnam/HN5148/2018	H5N6	2.3.4.4g	41	14	E	G	A	G	gAa/gGa	0.811	0.188
A/duck/Vietnam/HN5149/2018	H5N6	2.3.4.4g	41	14	E	G	A	G	gAa/gGa	0.951	0.049
A/duck/Vietnam/HN5144/2018	H5N6	2.3.4.4g	149	50	Y	C	A	G	tAc/tGc	0.823	0.175
A/duck/Vietnam/HN5148/2018	H5N6	2.3.4.4g	149	50	Y	C	A	G	tAc/tGc	0.817	0.182
A/duck/Vietnam/HN5149/2018	H5N6	2.3.4.4g	149	50	Y	C	A	G	tAc/tGc	0.951	0.045
A/duck/Vietnam/QN6798/2020	H5N6	2.3.4.4h	187	63	P	S	C	T	Cct/Tct	0.96	0.04
A/duck/Vietnam/HN5144/2018	H5N6	2.3.4.4g	262, 264	88	N	E	AaT	GaG	AaT/GaG	84%,85%	16%,15%
A/duck/Vietnam/HN5148/2018	H5N6	2.3.4.4g	262, 264	88	N	E	AaT	GaG	AaT/GaG	84%,84%	16%,16%
A/duck/Vietnam/HN5149/2018	H5N6	2.3.4.4g	262, 264	88	N	E	AaT	GaG	AaT/GaG	95%,95%	5%,5%
A/duck/Vietnam/HN5144/2018	H5N6	2.3.4.4g	266	89	D	G	A	G	gAt/gGt	0.843	0.157
A/duck/Vietnam/HN5148/2018	H5N6	2.3.4.4g	266	89	D	G	A	G	gAt/gGt	0.838	0.162
A/duck/Vietnam/HN5149/2018	H5N6	2.3.4.4g	266	89	D	G	A	G	gAt/gGt	0.952	0.048
A/muscovy-duck/Vietnam/HN4857/2018	H5N6	2.3.4.4h	282	94	I	M	A	G	atA/atG	0.944	0.056
*AA, amino acid; NT, nucleotide

[truncated: 2 more sheets: NS1_SNPs, NS2_SNPs]
